# Supplementary material for: Intragenomic Matching Reveals a Huge Potential for miRNA-Mediated Regulation in Plants
Source: PLoS Comput Biol. 2007 Nov 30;3(11):e238. doi: 10.1371/journal.pcbi.0030238 (PMC2098865; doi:10.1371/journal.pcbi.0030238)
Supplement: Dataset S1 — (606 KB TDS) [file pcbi.0030238.sd001.tds]

Locus_id Family_id	mirbase_id Location	pre-miRNA	mature miRNA svm_score JRCriteria	Genome context miSquare_with Targets copy_number
2 155 NC_003070:78924-79039:1	CATGTTGGGGGGGATGAAGCCTGGTCCGAGGATACTCTCTATGATCACTTGAATCATTAACATACACATGTATATATCTATAATATCCTCGATCCAGACAACATTCCCCTCAACTG	CCTCGATCCAGACAACATTCCCCT 0.774656 1	igr_sense, NM_113485.3,NM_122343.2,NM_113483.2,NM_112989.2,NM_202190.1,NM_129559.2,NM_102466.3,NM_122306.2, 11
3 156 NC_003070:1456732-1456855:1	GATTTGGGGCTTTGAGAATTTCTGGCCCATCCAACCCAAATCTGTTAAAGGTTGCCGACCACACCTTTCAATATTGGCCAGAGAAAGTGTGGCGATGGCCCAGAAAATCTCAAAGCCCCAAATC	CCCAGAAAATCTCAAAGCCC 0.434955 1	igr_sense, NM_100940.3,NM_128391.2,NM_119161.2,NM_104009.1, 6
4 157 NC_003070:2165558-2165703:1	AGATTCTTACATCTTGATGAAGAGGAATGGGAAGCCGAAATCTAAACTGAAACAGAGGCGTCACCCAATTATCAATTGGTAAGTGATATCTATGTTTCGATCTGTATCTCGGCCTTTCACTCCTCTTCTTCTTGATGTAAGAATTT	ACTCCTCTTCTTCTTGATGTA 0.184095 1	igr_sense, NM_123251.2,NM_101327.3,NM_116927.2,NM_114690.2,NM_117603.3,NM_127349.2,NM_101482.1,NM_123235.1,NM_100985.2,NM_116184.2,NM_125621.1,NM_103877.3,NM_123879.2,NM_117764.3,NM_120632.1,NM_122702.1,NM_122136.1,NM_120438.1,NM_121468.2,NM_105344.3,NM_125414.2,NM_104213.1,NM_122137.2,NM_121679.2,NM_112250.2,NM_122643.1,NM_111450.2,NM_117977.2,NM_127685.2,NM_113782.1,NM_102823.2,NM_115404.1,NM_1…
5 126 ath-MIR159b NC_003070:6220627-6220835:1	GGAAGAAGAAGAGGAAGAGCTCCTTGAAGTTCAATGGAGGGTTTAGCAGGGTGAAGTAAAGCTGCTAAGCTATGGATCCCATAAGCCTTATCAAATTCAATATAATTGATGATAAGGTTTTTTTTATGGATGCCATATCTCAGGAGCTTTCACTTACCCCTTTAATGGCTTCACTCTTCTTTGGATTGAAGGGAGCTCTTCATCTCTCC	TTTGGATTGAAGGGAGCTCTTC 0.0943226 1	repeat_sense,igr_sense, HASH(0x8e7ae70) NM_111977.3,NM_201666.1,NM_124884.1,NM_111520.4,NM_120692.2,NM_118867.1,NM_180448.1,NM_128805.3,NM_118827.1,NM_128252.1,NM_102642.1,NM_115910.1,NM_126230.2, 11
6 158 NC_003070:6695435-6695575:1	GAGAATGAGAATTGTTTGAATAGCCAAGGAGACTGCCTGACGACCAACCAACTCTAAGACTATCGATCGAGTGAGTCTTTGATATATATGGTCTAAAACGCAGGCAAGTCATCCTTGGCTACCACACAAGTTCTCATTCTT	TCCTTGGCTACCACACAAGT 0.218442 1	igr_sense, NM_105560.2,NM_117116.2,NM_116239.3,NM_117606.3,NM_125509.2, 3
7 159 NC_003070:7163420-7163490:1	GGAGTTAATCTTCAAACGACGTCGTTTTCAGAAGCTGGCTATTGAAAACGACGTCGTTGGTGATTTTATCT	AAACGACGTCGTTGGTGATT 0.0768759 0	igr_sense, NM_129774.2,NM_123399.2,NM_123012.2,NM_104259.1,NM_105400.2,NM_126142.2,NM_114630.3,NM_105627.1,NM_117176.2,NM_129571.2,NM_114575.3,NM_106389.3,NM_201860.1,NM_179880.1,NM_121050.1,NM_201917.1, 10
8 160 NC_003070:7221060-7221163:1	GCATAGGCATAGGCATAGGCATAGGCATAGCCATGGCGATGGGCATAGGCATAGGCATGGCCATGGGCATAGGCATGTGCATGTGCATGTGCATGTGCATGGGC	GTGCATGTGCATGTGCATGT 0.167691 1	cds_antisense,exon_antisense, NM_124922.1,NM_101931.2,NM_121894.1,NM_122742.1,NM_100972.3,NM_179834.1,NM_116540.3, 10
9 161 NC_003070:7843014-7843163:1	ATTGAGACTGACACAAGGCAGAAAGGTAACATTTGACTATTCACGAAAGCTGTTTATTAATACATGGCGTTTAGTTGATTATTGTAAATTTGTAATGTATAAGCCAGAAGGTTAAATGATGATACCTTTCTGTCTTGTGTCAGTCTTTAT	TACCTTTCTGTCTTGTGTCA 0.825619 0	intron_sense, NM_117686.2,NM_112543.1,NM_100901.2,NM_102071.1, 4
10 162 NC_003070:8014913-8014993:1	GAGAAGTGTCTCCGGTGGATTTTGTGTAGGCTCTAAGGAGAATGATCCACCAGAAACCTGAGTCCACCGGAGCCACTCTTC	GAGTCCACCGGAGCCACTCT 0.054892 1	cds_antisense,exon_antisense, NM_105858.1,NM_117019.3,NM_123500.2,NM_102112.2,NM_202796.1, 2
11 68 ath-MIR395b NC_003070:9364457-9364558:1	AATGTCCCCATGAGTTCCCTTTAACGCTTCATTGTTAAATACTCAAAGCCACATTGGTTTGTATACAACACTGAAGTGTTTGGGGGGACTCTTGGTGTCATT	CTGAAGTGTTTGGGGGGACTCT 0.582091 1	igr_sense, HASH(0x8ec827c) NM_123745.3,NM_121056.2,NM_117550.2,NM_113189.2,NM_128437.2, 12
12 68 ath-MIR395c NC_003070:9367066-9367167:1	AATGTCCACATGAGTTCCCTTTAACGCTTCATTGTTGAATACTCAAAGCCACATTGGTTTGTATATAACACTGAAGTGTTTGGGGGGACTCTTGGTGTCATT	CTGAAGTGTTTGGGGGGACTCT 0.610828 1	igr_sense, HASH(0x8ed098c) NM_123745.3,NM_121056.2,NM_117550.2,NM_113189.2,NM_128437.2, 12
13 163 NC_003070:10149817-10149907:1	GGAGACCGGAGAAACAAAGGAACTGGGTTTGGAGATAAGAAGTGGGAACTTGAATGGCTTCCTTATCCACTTCCGTTGTAGCTTCGGCTTC	TCCACTTCCGTTGTAGCTTCGG 0.0667886 1	exon_sense,cds_sense, NM_202269.1,NM_128015.2,NM_121980.2,NM_101617.1,NM_127754.2,NM_125588.1,NM_123792.2,NM_106331.3,NM_103882.2,NM_102573.2,NM_115311.2,NM_179458.1,NM_126576.1, 2
14 66 ath-MIR399a NC_003070:10227067-10227173:1	TACAGGGTAAGATCTCTATTGGCAGGAAACCATTACTTAGATCTTTGCATCTCTTTATGCATTGCTTTTAATTAGTGAGTTATCTGCCAAAGGAGATTTGCCCTGTA	CTGCCAAAGGAGATTTGCCCTG 0.367925 1	igr_sense, HASH(0x8ee4618) NM_179887.1,NM_106497.1,NM_111526.3,NM_123353.2,NM_121010.2, 11
15 164 NC_003070:10923706-10923792:1	TCATCCAGATGATTCATCCAAATGCTTGTTAAATTGTCATAAACAAACATCATTTTCCATCTCCATTTGGATGGATCATTTGGATGG	TTTGGATGGATCATTTGGAT 0.593189 0	repeat_sense,igr_sense, NM_123486.2,NM_125078.1,NM_117187.1,NM_112951.2,NM_115984.1,NM_112952.3,NM_106638.1,NM_122170.2,NM_104019.2,NM_125972.3, 56
16 165 NC_003070:11230467-11230568:1	GCGGTTGCGGCAGCGGCTGCGGCAGCGTCTGCGGCAACAAAACGAACAACAACCTGCGGTAGTGTTTGCCGCCACCGCTACCGCAGCCGCTGCCGCAACCGC	GCTACCGCAGCCGCTGCCGCA 0.0588703 1	igr_sense, NM_101509.3,NM_128349.2,NM_129032.3,NM_126101.1,NM_104229.2,NM_127563.1,NM_105977.2,NM_115741.3,NM_114478.3,NM_103863.2,NM_117235.3, 10
17 166 NC_003070:11609765-11609880:1	TTCGAATCCGGATCCGTGATCCGATCCAGAAAACCGAATAACCGGGTGCGACGGATCCGGATACGGGTAAAGCATTTACGAATCCGGCGGATCCGGATACGGATCCGGATTATGAA	CGGATCCGGATACGGATCCGG 0.0395047 1	igr_sense, NM_114861.2,NM_115600.4,NM_120967.2,NM_111258.3,NM_128279.3,NM_111107.1,NM_111813.2,NM_111488.1,NM_180177.1,NM_124558.1,NM_125891.2,NM_122605.1,NM_106399.3,NM_121914.2,NM_124961.1,NM_125388.2,NM_113022.3,NM_127392.1,NM_202244.1,NM_147888.2,NM_125365.2,NM_180898.1,NM_122402.2,NM_129624.4,NM_120297.2,NM_113763.2,NM_128037.1,NM_180520.1,NM_115413.3,NM_124629.2,NM_123505.2,NM_127539.2,NM_1…
18 167 NC_003070:11716084-11716330:1	GGGATTTTGAAATCTGAGACAGAGGTATTCATTGCAGCGCCTTGCTCCACAAAGAGAGAGGCCATTTGAGTGAAGACGACTGAGTAGATTATAGTGCAGAGCCAAATTGGCATCAGTCTAAGAATACACTTGACTTCCTCGACTTGTGTCACTGGACAGAGCCTCCATGGGTTCACTGAGTCTTGTTTCTTGTCATCTAGATCTCTAGCTGTGATGTACGCTGCTTTGTCCAAGAACCTGAAATTCC	TGCTTTGTCCAAGAACCTGAAA 0.0329521 0	cds_antisense,exon_antisense, NM_112572.1,NM_119005.2,NM_180925.1,NM_104896.2,NM_105654.1,NM_119985.2,NM_106132.2,NM_103078.1,NM_102470.1,NM_122730.1,NM_128653.2,NM_118288.2,NM_105872.3,NM_111029.2,NM_106715.3,NM_129607.3,NM_102980.2,NM_104667.2,NM_105312.2, 10
19 154 NC_003070:12994621-12994774:1	TGTTCGTTTGCCTGTCGTTGGTTCAGCGACCAAAAGTAGCGACAGTTGCCAGCGACCGCAATTTTTGGTCGCTGAAAATTTTAGCGATCATTCGCTGGTTTCAGCGTTTAGTCGCTGTTTTTGGTCGCTGAATCCAGCGACATGTAAACGAACA	TTGGTCGCTGAATCCAGCGACATG 0.36179 1	igr_sense, NM_117911.2,NM_179071.1,NM_202257.1,NM_128095.2,NM_105878.2, 56
20 2 NC_003070:13574764-13574899:1	GCAATTCCCTCGCAAAATTTGCGACGGAATAATTGTCTTGCTAAACTCTCGCAATTTGCAAGGGATATTAAATATCACAAATTCACTGCAAATGAGTTGTCACGCTAATTCCTCGCAAAAGTTGCGAGGGATTTGC	CCTCGCAAAAGTTGCGAGGGAT 0.621576 1	repeat_sense,igr_sense, NM_179750.2,NM_179749.1,NM_111328.2,NM_104162.1,NM_100450.1,NM_122762.1,NM_119331.4, 114
21 28 NC_003070:13654721-13654818:1	GTGGTCGAGTGTTAAGCTGGAGTCTTCTTTTCTTCCTTGTGCTCGAGTGTCTGGTTGAGTGCGGAATGGAGAAGACTCTGAAGCTGGCAGTCGAGTAT	AGAAGACTCTGAAGCTGGCA 0.284584 1	repeat_sense,igr_sense, NM_148526.1,NM_179950.1,NM_147956.1,NM_126430.1,NM_201705.1,NM_201713.1,NM_128183.2,NM_123958.2,NM_126793.1,NM_126833.1,NM_126773.1,NM_121699.3, 99
22 24 NC_003070:13799150-13799227:1	GAGGACACTCAACCTCGTGGTCGAGTGGTGAGGCGAAGTGGTGATTTCTTTTACTCGACCTGGGGGTCGAGTGGTCTC	TTACTCGACCTGGGGGTCGAGTGGT 0.635828 1	repeat_sense,igr_sense, NM_148526.1,NM_202235.1,NM_116794.1,NM_147956.1,NM_126781.1,NM_126888.1,NM_113972.1,NM_122822.1,NM_201705.1,NM_201713.1,NM_148798.1,NM_148247.1,NM_148782.1,NM_113973.1,NM_179432.1,NM_179436.1,NM_126793.1,NM_116802.1,NM_122819.1,NM_103339.1,NM_122830.1,NM_126833.1,NM_122821.1,NM_147987.1,NM_103342.1,NM_103391.1,NM_103358.1,NM_120741.2,NM_126773.1,NM_147965.1,NM_180584.1, 11…
23 24 NC_003070:13865522-13865628:1	TGATGATACTTGACCAGGGGGTCGAGTAACTTGGTAGAGTGAATGGTCGAGTGATGGTGATGGTGTGGCGAAGTGATACTCGACCAGGGGGTCGAGTAGTGTCATCG	TACTCGACCAGGGGGTCGAGTAGT 0.71656 0	repeat_sense,cds_antisense,exon_antisense, NM_148526.1,NM_202235.1,NM_116794.1,NM_147956.1,NM_126781.1,NM_126888.1,NM_113972.1,NM_122905.1,NM_122822.1,NM_201705.1,NM_148798.1,NM_122889.1,NM_201713.1,NM_148247.1,NM_148782.1,NM_113973.1,NM_180576.1,NM_179432.1,NM_179436.1,NM_122815.1,NM_126793.1,NM_116802.1,NM_147959.1,NM_103339.1,NM_122890.1,NM_126833.1,NM_122821.1,NM_147987.1,NM_103342.1,NM_11984…
24 24 NC_003070:13922473-13922668:1	GGTGATACTCGACTTCCAGGTGGAGTGATGAGGTCGAGTAGTGGTCTGGCAATGGGATGAAGACACTCGACCTCGGGGTCGAGTGATGTGATTGAGTGGTGGTCAGGAGATGGAGATGAAGACACTCGACCTGGTGGTCGAGTGGTGAGGTGAATTGGTGATGTCTTCTACTCGACCTGGGGGTCGAGTGGTCTCT	TACTCGACCTGGGGGTCGAGTGG 0.217384 1	repeat_sense,cds_antisense,exon_antisense, NM_148526.1,NM_202235.1,NM_116794.1,NM_147956.1,NM_126781.1,NM_126888.1,NM_113972.1,NM_122822.1,NM_201705.1,NM_201713.1,NM_148798.1,NM_148247.1,NM_148782.1,NM_113973.1,NM_179432.1,NM_179436.1,NM_126793.1,NM_116802.1,NM_122819.1,NM_103339.1,NM_122830.1,NM_126833.1,NM_122821.1,NM_147987.1,NM_103342.1,NM_103391.1,NM_103358.1,NM_120741.2,NM_126773.1,NM_14796…
25 92 NC_003070:14033324-14033438:1	GTCGCTGGTTCAGCGATCAAAAGTAGCGACAGTCGCCAGGGACCAGCGACCGTAATTTTTTGTCGTTAAAATTTTTAGCGATTAGTCGCTGCTTTTGGTCGCTGAATCCAGCGAC	GTCGCTGCTTTTGGTCGCTGAA 0.318214 1	igr_sense, NM_117673.3,NM_127408.1,NM_202257.1,NM_128095.2, 23
26 24 NC_003070:14094963-14095150:1	ATACTCGACCCCCAGGTCGAGTGACTTTGGAGCCATTCTTCCCATCCACTCGACCACCAGGTCGAGTAACCTCAGCTCAGGCCACTCGATGACAATACTCGACCCCCTGGTCGAGTATCACTTCGCCACACCATCACCATCACTCGACCATTCGCTCTACCAAGTTACTCGACCCCCTGGTCGAGTAT	TACTCGACCCCCTGGTCGAGT 0.424425 0	repeat_sense,igr_sense, NM_202235.1,NM_116794.1,NM_122820.1,NM_126781.1,NM_114067.1,NM_126888.1,NM_113972.1,NM_201705.1,NM_122822.1,NM_148798.1,NM_122889.1,NM_103402.1,NM_148782.1,NM_113973.1,NM_180576.1,NM_179432.1,NM_116802.1,NM_122819.1,NM_147959.1,NM_103339.1,NM_126833.1,NM_122890.1,NM_122821.1,NM_147987.1,NM_114100.1,NM_103342.1,NM_103391.1,NM_103358.1,NM_147971.1,NM_180578.1,NM_126773.1,NM_…
27 24 NC_003070:14181804-14181988:1	GTGAAGACACTCGACCTCGGGGTCGAGTGATGTGATCGAGTGATGGTCAGGTGATGGGATGAAGACACTCGACCTCGGGGTCGAGTGATGTGGTGAAGTAATGATGTCCTCTACTCGACCAGGGGGTCGAGTCATCTGTTGAGATCTTGAAGCTCCTACTCGACCTCGGGGTCGAGTGGTTTGAC	CTACTCGACCTCGGGGTCGAGTGG 0.167213 1	repeat_sense,igr_sense, NM_148526.1,NM_202235.1,NM_116794.1,NM_122820.1,NM_147956.1,NM_126781.1,NM_114067.1,NM_126888.1,NM_113972.1,NM_122822.1,NM_201705.1,NM_148798.1,NM_122889.1,NM_148247.1,NM_148782.1,NM_180576.1,NM_113973.1,NM_179432.1,NM_201718.1,NM_179436.1,NM_126793.1,NM_116802.1,NM_122819.1,NM_147959.1,NM_103339.1,NM_122890.1,NM_126833.1,NM_122821.1,NM_147987.1,NM_103342.1,NM_103391.1,NM_…
28 24 NC_003070:14249235-14249313:1	GCAGACCACTCGACCCCCTGGTCGAGTAGAGGACACCACCACTTCACCTCACCACTCGACCCCGAGGTCGAGTGTCTTC	CACTCGACCCCGAGGTCGAGTGTCTT 0.743742 0	repeat_sense,igr_sense, NM_148526.1,NM_202235.1,NM_116794.1,NM_122820.1,NM_126781.1,NM_147956.1,NM_114067.1,NM_126888.1,NM_113972.1,NM_122822.1,NM_201705.1,NM_122889.1,NM_148798.1,NM_148247.1,NM_103402.1,NM_148782.1,NM_113973.1,NM_180576.1,NM_179432.1,NM_179436.1,NM_100205.3,NM_126793.1,NM_116802.1,NM_122819.1,NM_147959.1,NM_103339.1,NM_114441.1,NM_122890.1,NM_126833.1,NM_122821.1,NM_147987.1,NM_…
29 132 NC_003070:14491984-14492074:1	CTGTACTCGACCCATGTGGTCGAGTGGGAGGTCGAGTGAATAGCTGGACTCTTCTTTTCTTCCTTGTGCTCGAGTGTCTGGTTGAGTGCAG	TGCTCGAGTGTCTGGTTGAGTGC 0.251768 1	repeat_sense,igr_sense, NM_202235.1,NM_116794.1,NM_147956.1,NM_126781.1,NM_126888.1,NM_113972.1,NM_201705.1,NM_106235.2,NM_148798.1,NM_201713.1,NM_148247.1,NM_122828.1,NM_113973.1,NM_179432.1,NM_179436.1,NM_126793.1,NM_147289.1,NM_116802.1,NM_103339.1,NM_179005.1,NM_126833.1,NM_147987.1,NM_103342.1,NM_103358.1,NM_179006.1,NM_126773.1,NM_147965.1, 347
30 24 NC_003070:14494090-14494293:1	TCAAGGAGATACTCGACTTCCAGGTTGAGTGATGAGGTCGAGTAGTGGTCTGGTAATGAAAGTGAAGACACTCGACTTCGGGGTCGAGTGATGTGATCGAGTGATGGTCAGGTGATGGAGATGAAGATGCTCGACCTCGTGGTCGAGTGGTGAGGTGAAGTTGTGATGTCTTCTACTCGACCTGGGGGTCGAGTGGTCTCTTGA	TACTCGACCTGGGGGTCGAGTGGT 0.688018 1	repeat_sense,igr_sense, NM_148526.1,NM_202235.1,NM_116794.1,NM_126781.1,NM_147956.1,NM_126888.1,NM_113972.1,NM_122822.1,NM_201705.1,NM_201713.1,NM_148798.1,NM_148247.1,NM_148782.1,NM_113973.1,NM_179432.1,NM_179436.1,NM_126793.1,NM_116802.1,NM_122819.1,NM_103339.1,NM_122830.1,NM_126833.1,NM_122821.1,NM_147987.1,NM_103342.1,NM_103391.1,NM_103358.1,NM_120741.2,NM_126773.1,NM_147965.1,NM_180584.1, 11…
31 8 NC_003070:15063728-15063821:1	GGTCGAGTGAATAGCTGGAGTCTTCTTTTCTTCCTTGTGCTCGAGTGTCTAGTTGAGTGCGGAATGAAGAAGACTCTGAAGCTTGTCATCGAGT	AAGAAGACTCTGAAGCTTGT 0.0115651 1	repeat_sense,igr_sense, NM_123893.1,NM_119549.2,NM_202235.1,NM_116794.1,NM_114828.3,NM_179950.1,NM_128031.2,NM_147956.1,NM_126781.1,NM_126888.1,NM_113972.1,NM_201705.1,NM_201713.1,NM_148798.1,NM_122828.1,NM_113973.1,NM_179432.1,NM_127531.2,NM_118787.2,NM_126833.1,NM_147987.1,NM_111173.2,NM_103342.1,NM_120153.2,NM_126773.1,NM_147965.1, 133
32 24 NC_003070:15063887-15064072:1	GTGAAGACACTCGACCTCGTGGTCGAGTGATGTGATCGAGTGATGGTCAAGTGATGGGGATGAAGACACTCGACCTCGTGGTCGAGTGATGTGATGAAATCGAGAAGCCCTCTACTCGACCTGGGGGTCGAGTGGTCTCTTGAGATCTTGAAGATCCTACTCGACCTCGGGGTCGAGTGGTTTGAC	ACTCGACCTCGGGGTCGAGTGGT 0.204033 1	repeat_sense,igr_sense, NM_148526.1,NM_202235.1,NM_116794.1,NM_122820.1,NM_147956.1,NM_126781.1,NM_114067.1,NM_126888.1,NM_113972.1,NM_122822.1,NM_201705.1,NM_148798.1,NM_122889.1,NM_148247.1,NM_148782.1,NM_180576.1,NM_113973.1,NM_179432.1,NM_201718.1,NM_179436.1,NM_126793.1,NM_116802.1,NM_122819.1,NM_147959.1,NM_103339.1,NM_122890.1,NM_126833.1,NM_122821.1,NM_147987.1,NM_103342.1,NM_103391.1,NM_…
33 24 NC_003070:15067478-15067556:1	GGAGACGCTCGACCTCGTGGTCGAGTGGTGAGGTGAAGTGGTGATGTCTTCTACTCGACCTCGGGGTCGAGTGGTCTCT	TACTCGACCTCGGGGTCGAGT 0.478051 1	repeat_sense,igr_sense, NM_148526.1,NM_202235.1,NM_116794.1,NM_122820.1,NM_147956.1,NM_126781.1,NM_114067.1,NM_126888.1,NM_113972.1,NM_122822.1,NM_201705.1,NM_122889.1,NM_148798.1,NM_148247.1,NM_148782.1,NM_180576.1,NM_113973.1,NM_179432.1,NM_201718.1,NM_179436.1,NM_126793.1,NM_116802.1,NM_122819.1,NM_147959.1,NM_103339.1,NM_122890.1,NM_126833.1,NM_122821.1,NM_147987.1,NM_103342.1,NM_103391.1,NM_…
34 24 NC_003070:15067420-15067604:1	GTGGTGAAAACACTCGACCTCGGGGTCGAGTGATGTGATCGAGTGATGGTCAGGTGATGGAGACGCTCGACCTCGTGGTCGAGTGGTGAGGTGAAGTGGTGATGTCTTCTACTCGACCTCGGGGTCGAGTGGTCTCTTGAGATCTTGAAGCTTCTACTCGACCTCTGGGTCGAGTGGTTTGTCAT	TACTCGACCTCTGGGTCGAGTG 0.0302153 1	repeat_sense,igr_sense, NM_148526.1,NM_202235.1,NM_116794.1,NM_122820.1,NM_126781.1,NM_147956.1,NM_114067.1,NM_126888.1,NM_113972.1,NM_122822.1,NM_122889.1,NM_201713.1,NM_148798.1,NM_148247.1,NM_103402.1,NM_148782.1,NM_113973.1,NM_180576.1,NM_179432.1,NM_179436.1,NM_126793.1,NM_116802.1,NM_111050.1,NM_122819.1,NM_147959.1,NM_103339.1,NM_122890.1,NM_126833.1,NM_122821.1,NM_147987.1,NM_103342.1,NM_…
35 24 NC_003070:15078237-15078323:1	GTGATGTCTTCTACTCGACCTGGGGGTCGAGTGGTGTCTTGAGATCTTGAAGCTTCTACTCGACCTCTGGGTCGAATGGTTTGTCAT	CTACTCGACCTCTGGGTCGAATG 0.164555 0	repeat_sense,igr_sense, NM_148526.1,NM_202235.1,NM_116794.1,NM_126781.1,NM_147956.1,NM_126888.1,NM_113972.1,NM_148798.1,NM_148247.1,NM_119749.3,NM_113973.1,NM_179432.1,NM_179436.1,NM_126793.1,NM_116802.1,NM_126833.1,NM_147987.1,NM_103342.1,NM_103391.1,NM_103358.1,NM_126773.1,NM_147965.1,NM_180584.1, 297
36 78 NC_003070:15296992-15297085:1	GCGAGAACAACTGCTTGTGGCTGCAAAGTATCATGTCTGTCATTGTGTAAGTTTAGTTCTAGATGATACTTTGCAGCCACAATCTATGTTCTGC	GATACTTTGCAGCCACAATCT 0.235311 1	repeat_sense,igr_sense, NM_120645.2,NM_101466.1,NM_100271.1,NM_106398.1,NM_100777.2,NM_126994.2,NM_202069.1,NM_113866.2,NM_201725.1,NM_117282.2,NM_103440.1,NM_111676.3,NM_123648.2,NM_102819.2,NM_105818.2, 43
37 78 NC_003070:15395095-15395188:1	GCGAGAACAACTGCTTGTGGCTGCAAAGTATCATGTCTGTCATTGTGTAAGTTTAGTTCTAGATGATACTTTGCAGCCACAATCTATGTTCTGC	GATACTTTGCAGCCACAATCT 0.235311 1	repeat_sense,igr_sense, NM_120645.2,NM_101466.1,NM_100271.1,NM_106398.1,NM_100777.2,NM_126994.2,NM_202069.1,NM_113866.2,NM_201725.1,NM_117282.2,NM_103440.1,NM_111676.3,NM_123648.2,NM_102819.2,NM_105818.2, 43
38 24 NC_003070:15435121-15435198:1	GAGGACACTCGACCTCGTGGTCGAGTGGTGAGGTGAAGTGGTGATTTCTTCTACTCGACCTGGGGGTCGAGTGGTCTC	CTACTCGACCTGGGGGTCGAGTGGT 0.553523 0	repeat_sense,cds_antisense,exon_antisense, NM_148526.1,NM_202235.1,NM_116794.1,NM_126781.1,NM_147956.1,NM_126888.1,NM_113972.1,NM_122822.1,NM_201705.1,NM_201713.1,NM_148798.1,NM_148247.1,NM_148782.1,NM_113973.1,NM_179432.1,NM_179436.1,NM_126793.1,NM_116802.1,NM_122819.1,NM_103339.1,NM_122830.1,NM_126833.1,NM_122821.1,NM_147987.1,NM_103342.1,NM_103391.1,NM_103358.1,NM_120741.2,NM_126773.1,NM_14796…
39 24 NC_003070:15435059-15435245:1	GGTGAAGACACTCGACCACGGGGTCGAGTGGTTTGATCGAGTGATGGTCAGGTGATGGAGATGAGGACACTCGACCTCGTGGTCGAGTGGTGAGGTGAAGTGGTGATTTCTTCTACTCGACCTGGGGGTCGAGTGGTCTCTTGAGATCTTGAAGCTCCTAGTCGACCTCGGGGTCGAGTGCTTTGAC	CTAGTCGACCTCGGGGTCGAGTG 0.00044438 1	repeat_sense,cds_antisense,exon_antisense, NM_148526.1,NM_202235.1,NM_116794.1,NM_147956.1,NM_126781.1,NM_126888.1,NM_113972.1,NM_148798.1,NM_148247.1,NM_148782.1,NM_113973.1,NM_179432.1,NM_179436.1,NM_118264.2,NM_126793.1,NM_116802.1,NM_103339.1,NM_126833.1,NM_147987.1,NM_103342.1,NM_103391.1,NM_103358.1,NM_126773.1,NM_147965.1,NM_180584.1, 452
40 24 NC_003070:15449057-15449153:1	GATGAAGTCACTCGACCTGGGGGTCGAGTGATGTGATCGAGTGATGGTCAGAAGATGGAGATGAAGTCACTCGACCTGGGGGTCGAGTGAGGTGATC	AAGTCACTCGACCTGGGGGTCGAGTG 0.622479 1	repeat_sense,igr_sense, NM_148526.1,NM_202235.1,NM_116794.1,NM_126781.1,NM_147956.1,NM_126888.1,NM_113972.1,NM_122822.1,NM_201705.1,NM_148798.1,NM_201713.1,NM_148247.1,NM_148782.1,NM_113973.1,NM_179432.1,NM_179436.1,NM_126793.1,NM_116802.1,NM_122819.1,NM_103339.1,NM_122830.1,NM_126833.1,NM_122821.1,NM_147987.1,NM_103342.1,NM_103391.1,NM_103358.1,NM_126773.1,NM_147965.1,NM_180584.1, 1101
41 24 NC_003070:15456238-15456394:1	TGATGGTGATACTCGAGTTCCAGGTAGAGTGACGAGGTCGTGTAGATGTCTGGCAATGGGATGAAGTCACTCGACCTGGGGGTCAAGTGATGTGATCGAGTGATGGTCAGAAGATGGAGATGAAGTCACTCGACCTGGGGGTCGAGTGAGGTGATCG	ACTCGACCTGGGGGTCGAGTGA 0.0551255 1	repeat_sense,igr_sense, NM_148526.1,NM_202235.1,NM_116794.1,NM_126781.1,NM_147956.1,NM_126888.1,NM_113972.1,NM_122822.1,NM_201705.1,NM_201713.1,NM_148798.1,NM_148247.1,NM_148782.1,NM_113973.1,NM_179432.1,NM_179436.1,NM_126793.1,NM_116802.1,NM_122819.1,NM_103339.1,NM_122830.1,NM_126833.1,NM_122821.1,NM_147987.1,NM_103342.1,NM_103391.1,NM_103358.1,NM_126773.1,NM_147965.1,NM_180584.1, 1099
42 24 NC_003070:15456297-15456542:1	GATGAAGTCACTCGACCTGGGGGTCAAGTGATGTGATCGAGTGATGGTCAGAAGATGGAGATGAAGTCACTCGACCTGGGGGTCGAGTGAGGTGATCGAGTGGTGGTCAAGAGATGGAGATGAAGAAACTCGACTTGGGGGTCGAGTGATGTGATAGAGTGGTGGTGTCTTCTACTCGACCTGGGGGTCGAGTGGTCTCTTGAGATCTTGAAGCTCCTACTTGACCTCTAGGTCGAGTGGTTTGTC	ACTTGACCTCTAGGTCGAGTG 0.219619 1	repeat_sense,igr_sense, NM_122441.1,NM_202235.1,NM_116794.1,NM_104482.1,NM_147956.1,NM_126781.1,NM_126888.1,NM_104275.1,NM_113972.1,NM_122889.1,NM_148798.1,NM_148782.1,NM_113973.1,NM_180576.1,NM_179432.1,NM_120435.1,NM_126793.1,NM_122819.1,NM_147959.1,NM_122890.1,NM_147987.1,NM_103342.1,NM_103391.1,NM_147971.1,NM_180578.1,NM_126773.1,NM_147965.1, 138
43 24 NC_003070:15485994-15486182:1	ATACTCGACCCCCAGGTCGAGTGACTTTGTAGCCATTCTTCCCATCCACTCGACCACCGGGTCGAGTAACCTCAGCTCAGGCGACTCGATGACACTACTCGACCCCCTGGTCGAGTATCACTTCGCCACACCACCTGACAACACTCGACCAATCACTCTACCAAGTTACTCGACCCCCTGGTCGAGTAT	TACTCGACCCCCTGGTCGAGT 0.275874 0	repeat_sense,igr_sense, NM_202235.1,NM_116794.1,NM_122820.1,NM_126781.1,NM_114067.1,NM_126888.1,NM_113972.1,NM_122822.1,NM_201705.1,NM_122889.1,NM_148798.1,NM_103402.1,NM_148782.1,NM_113973.1,NM_180576.1,NM_179432.1,NM_116802.1,NM_122819.1,NM_147959.1,NM_103339.1,NM_122890.1,NM_126833.1,NM_122821.1,NM_147987.1,NM_114100.1,NM_103342.1,NM_103391.1,NM_103358.1,NM_147971.1,NM_180578.1,NM_126773.1,NM_…
44 24 NC_003070:15494540-15494614:1	AGATCACTTGACCCCGCGGTCGAGTAGAGGACATCACTACTTCACCACATCACTCGACCCCGAGGTCGAGTGTCT	CACTCGACCCCGAGGTCGAGTGT 0.165373 0	repeat_sense,igr_sense, NM_148526.1,NM_202235.1,NM_116794.1,NM_122820.1,NM_147956.1,NM_126781.1,NM_114067.1,NM_126888.1,NM_113972.1,NM_122822.1,NM_201705.1,NM_122889.1,NM_148798.1,NM_148247.1,NM_148782.1,NM_113973.1,NM_180576.1,NM_179432.1,NM_179436.1,NM_100205.3,NM_126793.1,NM_116802.1,NM_147959.1,NM_122819.1,NM_103339.1,NM_114441.1,NM_122890.1,NM_126833.1,NM_122821.1,NM_147987.1,NM_130345.2,NM_…
45 24 NC_003070:15521464-15521562:1	TGATGAAGGTACTCGACCATGTGGTCGAGTAGGGTGATCGAGTGAAGGTGATGTGGTGGACGTGATGATACTCGACCAGGGGGTCGAGTGATGTGATCG	GATACTCGACCAGGGGGTCGAGTG 0.281027 1	repeat_sense,igr_sense, NM_148526.1,NM_202235.1,NM_116794.1,NM_147956.1,NM_126781.1,NM_126888.1,NM_113972.1,NM_122822.1,NM_201705.1,NM_148798.1,NM_122889.1,NM_201713.1,NM_148247.1,NM_148782.1,NM_113973.1,NM_180576.1,NM_179432.1,NM_179436.1,NM_122815.1,NM_126793.1,NM_116802.1,NM_147959.1,NM_103339.1,NM_126833.1,NM_122890.1,NM_122821.1,NM_147987.1,NM_103342.1,NM_103391.1,NM_119847.2,NM_103358.1,NM_…
46 24 NC_003070:15717108-15717230:1	AGACACTCGACCAGGTGGTCGAGTGAAGTGATCGAATGACTCTCGTGGTGGTACTCGGCCAGAGGGTCGAGTGATGAGGCGAAGTGGTGAAGTCCTATACTCGACCAGGGGGTCGAGTGGTCT	ATACTCGACCAGGGGGTCGAGTGGT 0.891658 1	repeat_sense,igr_sense, NM_148526.1,NM_202235.1,NM_116794.1,NM_126781.1,NM_147956.1,NM_126888.1,NM_113972.1,NM_122822.1,NM_201705.1,NM_122889.1,NM_201713.1,NM_148798.1,NM_148247.1,NM_148782.1,NM_180576.1,NM_113973.1,NM_179432.1,NM_179436.1,NM_122815.1,NM_126793.1,NM_116802.1,NM_147959.1,NM_103339.1,NM_122890.1,NM_126833.1,NM_122821.1,NM_147987.1,NM_103342.1,NM_119847.2,NM_103391.1,NM_103358.1,NM_…
47 24 NC_003070:15717108-15717230:1	AGACACTCGACCAGGTGGTCGAGTGAAGTGATCGAATGACTCTCGTGGTGGTACTCGGCCAGAGGGTCGAGTGATGAGGCGAAGTGGTGAAGTCCTATACTCGACCAGGGGGTCGAGTGGTCT	TCGACCAGGGGGTCGAGTGGT 0.592273 0	repeat_sense,igr_sense, NM_148526.1,NM_202235.1,NM_116794.1,NM_126781.1,NM_147956.1,NM_126888.1,NM_113972.1,NM_201705.1,NM_122822.1,NM_201713.1,NM_148798.1,NM_148247.1,NM_148782.1,NM_113973.1,NM_179432.1,NM_179436.1,NM_122815.1,NM_126793.1,NM_116802.1,NM_103339.1,NM_126833.1,NM_122821.1,NM_147987.1,NM_103342.1,NM_103391.1,NM_103358.1,NM_122817.1,NM_126773.1,NM_147965.1,NM_180584.1, 670
48 24 NC_003070:15794057-15794149:1	GTGGTGATGTCCTCTACTCGACCTGGTGGTCGAGTGGTTTCTTGAGATCTTGAAGCTCCTACTCGACCTCTGGGTCGAGTGGTTTGTCATGAT	CTACTCGACCTCTGGGTCGAGTGGT 0.353379 1	repeat_sense,igr_sense, NM_148526.1,NM_202235.1,NM_116794.1,NM_122820.1,NM_126781.1,NM_147956.1,NM_114067.1,NM_126888.1,NM_113972.1,NM_122822.1,NM_201713.1,NM_148798.1,NM_122889.1,NM_148247.1,NM_103402.1,NM_148782.1,NM_113973.1,NM_180576.1,NM_179432.1,NM_179436.1,NM_126793.1,NM_116802.1,NM_111050.1,NM_147959.1,NM_122819.1,NM_103339.1,NM_122890.1,NM_126833.1,NM_122821.1,NM_147987.1,NM_103342.1,NM_…
49 24 NC_003070:15794058-15794151:1	TGGTGATGTCCTCTACTCGACCTGGTGGTCGAGTGGTTTCTTGAGATCTTGAAGCTCCTACTCGACCTCTGGGTCGAGTGGTTTGTCATGATCA	TCGACCTCTGGGTCGAGTGGTTTG 0.0319874 0	repeat_sense,igr_sense, NM_202235.1,NM_116794.1,NM_122820.1,NM_147956.1,NM_126781.1,NM_126888.1,NM_113972.1,NM_148798.1,NM_148782.1,NM_113973.1,NM_179432.1,NM_126793.1,NM_116802.1,NM_103339.1,NM_126833.1,NM_147987.1,NM_103342.1,NM_103391.1,NM_103358.1,NM_126773.1,NM_147965.1,NM_180584.1, 334
50 86 NC_003070:15794049-15794161:1	GAAGTGAAGTGGTGATGTCCTCTACTCGACCTGGTGGTCGAGTGGTTTCTTGAGATCTTGAAGCTCCTACTCGACCTCTGGGTCGAGTGGTTTGTCATGATCAGGTCCGCTTC	GGTCGAGTGGTTTGTCATGATCA 0.125356 1	repeat_sense,igr_sense, NM_202235.1,NM_126888.1,NM_113972.1,NM_100838.4,NM_102530.2,NM_113973.1,NM_125106.2,NM_202071.1,NM_147987.1,NM_104681.3,NM_103391.1,NM_147965.1, 187
51 24 NC_003070:15837439-15837522:1	ATGATGGCACTCGACCTCGGGGTCGAGTGGTGAGGTGAAGTGGTGATGTCTTCTACTCGACCTGGTGGTCGAGTGGTTTGTCAT	TCTACTCGACCTGGTGGTCGAGTGGT 0.79319 1	repeat_sense,cds_antisense,exon_antisense, NM_148526.1,NM_202235.1,NM_116794.1,NM_122820.1,NM_126781.1,NM_147956.1,NM_114067.1,NM_126888.1,NM_113972.1,NM_113967.1,NM_201705.1,NM_122822.1,NM_201713.1,NM_148798.1,NM_148247.1,NM_148782.1,NM_113973.1,NM_179432.1,NM_179436.1,NM_122815.1,NM_126793.1,NM_116802.1,NM_122819.1,NM_103339.1,NM_179005.1,NM_122830.1,NM_126833.1,NM_122821.1,NM_147987.1,NM_10334…
52 24 NC_003070:15837439-15837522:1	ATGATGGCACTCGACCTCGGGGTCGAGTGGTGAGGTGAAGTGGTGATGTCTTCTACTCGACCTGGTGGTCGAGTGGTTTGTCAT	CTCGACCTGGTGGTCGAGTGGT 0.504126 0	repeat_sense,cds_antisense,exon_antisense, NM_148526.1,NM_202235.1,NM_116794.1,NM_126781.1,NM_147956.1,NM_114067.1,NM_126888.1,NM_113972.1,NM_113967.1,NM_201705.1,NM_122822.1,NM_148798.1,NM_201713.1,NM_148247.1,NM_148782.1,NM_113973.1,NM_179432.1,NM_179436.1,NM_122815.1,NM_126793.1,NM_116802.1,NM_103339.1,NM_179005.1,NM_126833.1,NM_122821.1,NM_147987.1,NM_103342.1,NM_103391.1,NM_103358.1,NM_12281…
53 38 NC_003070:15852507-15852597:1	GTGGGGTGTCGATCGACACTGGTGGTGGTGTCAATCGACACTGGTGGTGGTGTCGATTGATACTGGTGGTGGTGTCGATCGACACCATCGC	GGTGGTGTCGATCGACACCATC 0.243832 0	repeat_sense,igr_sense, NM_114016.1,NM_114102.1,NM_147252.1,NM_126896.1,NM_114074.1,NM_148519.1,NM_126950.1,NM_114079.1,NM_148522.1,NM_148282.1,NM_103410.1,NM_122848.1,NM_148529.1,NM_126918.1,NM_111421.2,NM_114097.1, 922
54 168 NC_003070:16195991-16196089:1	GCTCGGGATCGATCGATCCCAGGAGGGGACCGATCGATCCAGGTCGTCTGCCAGATGAAGGTTCAGACCCGCCAGGATGGGATCGATCGATCCCAGGGC	ATGGGATCGATCGATCCCAGG 1.13647 0	igr_sense, NM_104391.1,NM_113998.2, 46
55 169 NC_003070:16609962-16610074:1	TGCGAGGGAAGGCATTCCTCGCAGTTTTTGCGAGGGTATTGCGAGTAACGTGCTACACATCGGACGCGCGTAGCAATTCCGTCGCAAAACTTGCGAGGGAAGGCTTCCTCGCA	CTTGCGAGGGAAGGCTTCCTCG 0.517965 1	repeat_sense,igr_sense, NM_105930.2,NM_117511.3,NM_123698.2,NM_118743.2,NM_148142.2,NM_202891.1,NM_119030.3,NM_100324.2, 10
56 170 NC_003070:16768712-16768863:1	GATCAACGGTTGAAATGACAAGGCCAAGATACGGCAAGAAAATATTATTCTAAAAGATAAATGTTAAACTTTCTAAACTTCAATATTAACATTTATCTTCTAGAATAATATCTTTTTGTTATATCTTGGCCTTGTCATCTCAACCGTCGATC	ATCTTGGCCTTGTCATCTCA 0.0792115 1	intron_antisense, NM_112035.2,NM_124619.2,NM_103454.1,NM_124051.2,NM_104293.2,NM_148767.1, 7
57 78 NC_003070:18164889-18164982:1	GCGAGAACAACTGCTTGTGGCTGCAAAGTATCGTGTCTGTCATTGTGTAAGTTTAGTTCTAGATGATACTTTGCAGCCACAATCTATGTTCTGC	GATACTTTGCAGCCACAATCT 0.214587 1	repeat_sense,igr_sense, NM_120645.2,NM_101466.1,NM_100271.1,NM_106398.1,NM_100777.2,NM_126994.2,NM_202069.1,NM_113866.2,NM_201725.1,NM_117282.2,NM_103440.1,NM_111676.3,NM_123648.2,NM_102819.2,NM_105818.2, 43
58 171 NC_003070:19163177-19163266:1	GCCTAAATATATTGTTGAACCAACAACATTATTTGGTCATGATCAAACAATGTCCGTTTTGTAGTTGTTGGTTCAACAACATATTTTGGC	AGTTGTTGGTTCAACAACAT 0.383953 1	utr_antisense,exon_antisense, NM_111600.3,NM_119306.1,NM_128143.2,NM_114996.2,NM_102390.2,NM_101483.1,NM_105314.3,NM_104451.3,NM_202682.1,NM_202184.1,NM_105700.1,NM_101478.2,NM_129754.2,NM_103076.3,NM_119504.2,NM_114759.2,NM_106539.3,NM_179462.1, 10
59 172 NC_003070:20091710-20091813:1	ATGAAACTATCTCAGTGGTGAGTGGCAGTCCTGAGCGTACGACAGGCTTAGATTCTGCTTCTATTGGCGACAGCTACCATTCACCAACTGCAGACAGTTCTCAT	CCATTCACCAACTGCAGACA 0.342016 1	repeat_sense,igr_sense, NM_115361.2,NM_115336.3,NM_100649.1,NM_127618.2, 2
60 98 NC_003070:20626233-20626358:1	GTTAACACTCCTTAACAGCGCTCCTAACAGCCCTTACAAAACATGGCCTAACAGCCGTTATCGTTGGTTTAAGGACGAAAACAGTTGTTAGTTACGCTGTTAGGAGAGCTGTTAAGAAGTGTTAAC	GTTAGGAGAGCTGTTAAGAAG 0.218192 1	repeat_sense,igr_sense, NM_114951.2,NM_128849.1,NM_124625.2,NM_102048.1, 26
61 50 ath-MIR158b NC_003070:20775884-20775968:1	ATCTCTGTGCTTCTTTGTCTACACTTTTGGAAAAGGTGATGATATCATTGCTTTTCCCCAAATGTAGACAAAGCAATACCGTGAT	CCCCAAATGTAGACAAAGCA 1	igr_sense, NM_105083.1,NM_125494.2,NM_126373.2,NM_111619.3,NM_126372.1, 4
62 173 NC_003070:22153598-22153702:1	GATTCATTTCAGATGGCTGTTTGGGTAACTAATATTTAAGATTTTGGTCAATTTAAGTTACCAATTTATATATTGGTTACCCATATGGCCATCTCAAATTTAATC	TGGTTACCCATATGGCCATCTC 0.955401 1	igr_sense, NM_202318.1,NM_112879.1,NM_121910.3,NM_114897.2,NM_105412.1,NM_113171.1,NM_112629.1,NM_113169.1, 2
63 174 NC_003070:22580779-22580883:1	AGCGGGATGATGAATCCGACCATGATGGTGTTGCAGAAATTTATGTATGATGTAGTTATTGTCCAGGGATCGAAACACCATCATGGTCAGATCCGTCATCCCACT	ACACCATCATGGTCAGATCCG 0.889083 1	igr_sense, NM_104554.2,NM_128476.1,NM_100735.2,NM_104091.2,NM_201890.1,NM_104093.1,NM_104081.2,NM_104094.1,NM_118971.2,NM_201891.1,NM_179949.2,NM_104704.1,NM_123216.2, 8
64 175 NC_003070:22580768-22580894:1	GAGAGGCTATAAGCGGGATGATGAATCCGACCATGATGGTGTTGCAGAAATTTATGTATGATGTAGTTATTGTCCAGGGATCGAAACACCATCATGGTCAGATCCGTCATCCCACTTATGTTTTCTT	TCATGGTCAGATCCGTCATCCCACTTA 0.860439 1	igr_sense, NM_116205.3,NM_130154.2,NM_128157.3,NM_104703.1,NM_104554.2,NM_101814.2,NM_104088.2,NM_104091.2,NM_201890.1,NM_104093.1,NM_124365.1,NM_124363.2,NM_121007.1,NM_125184.2,NM_104094.1,NM_122735.1,NM_201891.1,NM_180409.1,NM_104514.2,NM_121385.2,NM_179949.2,NM_104704.1,NM_123216.2,NM_104952.2, 15
65 176 NC_003070:23097480-23097562:1	AAACATGTGGGAGGACTCCAAGTGTGGTTATATCCTCGGTATTATCTCGATGTGAACCACACTTGGAGTCCTCCCACATGTTT	GTGAACCACACTTGGAGTCCTC 0.499374 1	exon_sense,cds_sense, NM_128553.1,NM_119471.1,NM_115693.1,NM_116295.3,NM_147891.2,NM_179374.1,NM_126404.1,NM_148068.1,NM_114787.1,NM_104921.1, 16
66 22 NC_003070:23097480-23097562:1	AAACATGTGGGAGGACTCCAAGTGTGGTTATATCCTCGGTATTATCTCGATGTGAACCACACTTGGAGTCCTCCCACATGTTT	ACCACACTTGGAGTCCTCCCACA 0.833641 1	igr_sense, NM_103695.1,NM_117515.1,NM_129220.2,NM_179374.1,NM_148068.1,NM_114787.1,NM_104921.1, 11
67 177 NC_003070:24280731-24280849:1	CCAAATGGAGGGTGGACTCCTTTTGGATGTTGTAATCAGCGAGTGTGCGACCGTCTTCAAGCTGCTTACCGGCAAAGATAAGCCTCTGCTGATCCGGAGGGATTCCTTCCTTATCCTGG	TCCGGAGGGATTCCTTCCTT 0.7485 0	cds_antisense,exon_antisense, NM_116090.2,NM_120402.2,NM_115119.2,NM_130278.1,NM_178968.1,NM_105209.1,NM_180698.1,NM_116523.2,NM_116744.2,NM_202787.1,NM_125390.2,NM_123123.1,NM_112991.1,NM_102190.2,NM_178970.2,NM_178969.1,NM_122069.2,NM_178961.1,NM_178960.1,NM_116771.2,NM_129175.1,NM_111814.1, 15
68 178 ath-MIR163 NC_003070:24887729-24888059:1	ACCCGGTGGATAAAATCGAGTTCCAACCTCTTCAACGACAACGATTTCAACACTCTCTTCCAGGAACAACTTCCTCCAGGCAGATGATACTAAAGTGCTGGAGTTCCCGGTTCCTGAGAGTGAGTCCATATCAAAATGCGCATTCGTTATCACTTGGTTGAACCCATTTGGGGATTTAAATTTGGAGGTGAAATGGAACGCGTAATTGATGACTCCTACGTGGAACCTCTTCTTAGGAAGAGCACGGTCGAAGAAGTAACTGCGCAGTGCTTAAATCGTAGATGCTAAAGTCGTTGAAGAGGACTTGGAACTTCGATATTATCCCCCGTGT	TTGAAGAGGACTTGGAACTTCGAT 0	igr_sense, NM_123272.2,NM_105340.1,NM_105158.2,NM_202367.1,NM_113406.1,NM_121969.1,NM_118548.2,NM_123274.1,NM_113722.2,NM_105342.1,NM_129022.2,NM_112446.1,NM_121586.2,NM_129402.2,NM_123280.2,NM_148466.1,NM_101560.1,NM_123277.1,NM_202876.1,NM_111291.3,NM_113405.1,NM_105341.3, 14
69 179 NC_003070:25184259-25184340:1	AAAGATTTACAAGGGATTTTAAAAGGGTTTTAAAAAATTTACAAGTAATTTAAAAAGGTGTTAAAATCCCTTGTAAATTTTT	AAGGTGTTAAAATCCCTTGT 0.113842 0	repeat_sense,igr_sense, NM_102884.1,NM_148153.1,NM_100459.2, 226
70 98 NC_003070:25617114-25617245:1	ACCATTAACACTCCTTAACAGCGCTCCTAACAGCCGTTACAAAACGTGGCCTAACAATCGTTATCGTTGGTTTAAGGACGAAAACAGTTGTTAGTTACGCTGTTAGGAGAGCTGTTAAGAAGTGTTAACGGT	GTTAGGAGAGCTGTTAAGAAG 0.265474 1	repeat_sense,igr_sense, NM_114951.2,NM_128849.1,NM_124625.2,NM_102048.1, 26
71 68 ath-MIR395f NC_003070:26277521-26277632:1	ATGTCCCCTTGAGTTCCCTTAAACGCTTCATTGTTCATACTTTGTTATCATCTATCGATCGATCAATCAATCTGATGAACACTGAAGTGTTTGGGGGGACTCTAGGTGACAT	CTGAAGTGTTTGGGGGGACTCT 0.76552 1	igr_sense, HASH(0x9805d10) NM_123745.3,NM_121056.2,NM_117550.2,NM_113189.2,NM_128437.2, 12
72 180 NC_003070:27817987-27818080:1	GAAGTCAATAGAGAGAAAGAGTTTCTGGTGAAGAACTTTAGCTCCAGTGTTCTCTGAAGTCTTCGCGCCAGGAGCTTCCTCGTTCTTCGGCTTT	CCAGGAGCTTCCTCGTTCTT 0.0370255 1	cds_antisense,exon_antisense, NM_112807.1,NM_119944.2,NM_128981.2,NM_106082.1,NM_102165.1,NM_130187.2,NM_122537.2,NM_106055.3,NM_117327.2, 2
73 52 NC_003071:442904-443081:1	TCCGATCTCCGGTGGGATTTCTCCGGCGATGTTGTTGTACCAAGCTATGAATTGCTCGAGTTTCTGGAGGTTTCCGATCTCCGGTGGGATTGTACCGTTGAGATAATTGAGACTGAGATCAATCGTTCGTAGCTCAGAGCATTGAGATATCGCCGGTGGAATCTCTCCGGTGACGAGA	ATCGCCGGTGGAATCTCTCCGGTGA 0.448026 1	cds_antisense,exon_antisense, NM_117970.3,NM_124986.3,NM_112183.2,NM_125456.2,NM_122494.2,NM_127655.2,NM_102612.3,NM_104833.2,NM_113329.1,NM_121626.3,NM_119888.2,NM_106232.3,NM_180611.1,NM_102259.1,NM_128066.3,NM_148696.2,NM_123419.2,NM_102969.3,NM_180414.2,NM_129841.3,NM_100871.3,NM_105511.2,NM_114827.3,NM_129791.2,NM_103686.1,NM_119007.2,NM_112096.2,NM_126256.3,NM_111041.3,NM_124271.1,NM_127894…
74 52 NC_003071:442904-443081:1	TCCGATCTCCGGTGGGATTTCTCCGGCGATGTTGTTGTACCAAGCTATGAATTGCTCGAGTTTCTGGAGGTTTCCGATCTCCGGTGGGATTGTACCGTTGAGATAATTGAGACTGAGATCAATCGTTCGTAGCTCAGAGCATTGAGATATCGCCGGTGGAATCTCTCCGGTGACGAGA	CCGGTGGAATCTCTCCGGTGA 0.15697 1	cds_antisense,exon_antisense, NM_124986.3,NM_112183.2,NM_122494.2,NM_127655.2,NM_102612.3,NM_119888.2,NM_113329.1,NM_106232.3,NM_180611.1,NM_102259.1,NM_123419.2,NM_102969.3,NM_100871.3,NM_105511.2,NM_114827.3,NM_103686.1,NM_129791.2,NM_119007.2,NM_112096.2,NM_126256.3,NM_111041.3,NM_124271.1,NM_127894.1,NM_118146.3,NM_120100.2,NM_124003.2,NM_125967.3,NM_116535.1,NM_122076.1,NM_116755.4,NM_125968…
75 181 NC_003071:752518-752630:1	GCGTTTGGTATTCCTCGAACCCAAGACCTCACCCTTTAGATTAATTGGTAACAGTTTGTCCTGTGGGAAGGTTGTTAAAGGGTGAGGTCTTGGGTTCGAGGAACGCCAAGCGC	AGGTCTTGGGTTCGAGGAAC 0.523998 1	igr_sense, NM_120819.2,NM_112899.2,NM_117623.2,NM_180455.1,NM_180456.1,NM_202614.1,NM_202615.1, 16
76 138 NC_003071:752516-752632:1	GTGCGTTTGGTATTCCTCGAACCCAAGACCTCACCCTTTAGATTAATTGGTAACAGTTTGTCCTGTGGGAAGGTTGTTAAAGGGTGAGGTCTTGGGTTCGAGGAACGCCAAGCGCAC	TGGGTTCGAGGAACGCCAAG 0.0864484 1	igr_sense, NM_102771.2,NM_118625.2, 16
77 182 NC_003071:1039463-1039572:1	GGACTTCTCATCTTCTTTCTTAGCCGCCGGTGCTCCAGCTCCACCACCGTGTCCTCCAACATTACCGTGGCTTCCAGTTCCACCGGTGGAGGAGTGAGAGTGGGAAGTTT	CACCGGTGGAGGAGTGAGAG 0.36573 1	cds_antisense,exon_antisense, NM_129877.1,NM_112788.2,NM_114522.2,NM_130077.2,NM_126395.2,NM_118778.1,NM_129662.3,NM_103823.1, 2
78 144 ath-MIR398a NC_003071:1040941-1041033:1	TTCAAAGGAGTGGCATGTGAACACATATCCTATGGTTTCTTCAAATTTCCATTGAAACCATTGAGTTTTGTGTTCTCAGGTCACCCCTTTGAA	TGTGTTCTCAGGTCACCCCTT 0	igr_sense, HASH(0x98566a0) NM_112434.2,NM_100757.2, 4
79 24 NC_003071:2577815-2577921:1	GTGATGATACTCGACCAGGGGGTCGAGTAACTTGGTAGAGTGAATGGCCGAGTGTGGTCAGGTGGTGTGGCGAAGTGATACTCGACCAGGGGGTCGAGTGGCGTCAT	TGATACTCGACCAGGGGGTCGAGTGG 0.622547 0	repeat_sense,igr_sense, NM_148526.1,NM_202235.1,NM_116794.1,NM_126781.1,NM_147956.1,NM_126888.1,NM_113972.1,NM_201705.1,NM_122822.1,NM_148798.1,NM_122889.1,NM_201713.1,NM_148247.1,NM_148782.1,NM_180576.1,NM_113973.1,NM_179432.1,NM_179436.1,NM_122815.1,NM_126793.1,NM_116802.1,NM_147959.1,NM_103339.1,NM_122890.1,NM_126833.1,NM_122821.1,NM_147987.1,NM_103342.1,NM_119847.2,NM_103391.1,NM_103358.1,NM_…
80 24 NC_003071:2577815-2577921:1	GTGATGATACTCGACCAGGGGGTCGAGTAACTTGGTAGAGTGAATGGCCGAGTGTGGTCAGGTGGTGTGGCGAAGTGATACTCGACCAGGGGGTCGAGTGGCGTCAT	ACTCGACCAGGGGGTCGAGTGG 0.522646 0	repeat_sense,igr_sense, NM_148526.1,NM_202235.1,NM_116794.1,NM_126781.1,NM_147956.1,NM_126888.1,NM_113972.1,NM_122822.1,NM_201705.1,NM_122889.1,NM_201713.1,NM_148798.1,NM_148247.1,NM_148782.1,NM_180576.1,NM_113973.1,NM_179432.1,NM_179436.1,NM_122815.1,NM_126793.1,NM_116802.1,NM_147959.1,NM_103339.1,NM_122890.1,NM_126833.1,NM_122821.1,NM_147987.1,NM_103342.1,NM_119847.2,NM_103391.1,NM_103358.1,NM_…
81 24 NC_003071:2787690-2787769:1	GTCTTCTACTCGACCAGGGGGTCGAGTGGTCTATTGAGGTTGTGAAGGATCTACTCGACCAAAGGGTCGAGTGGTTTGAT	TACTCGACCAAAGGGTCGAGTGGT 0.152669 0	repeat_sense,igr_sense, NM_148526.1,NM_202235.1,NM_116794.1,NM_126781.1,NM_147956.1,NM_114067.1,NM_126888.1,NM_113972.1,NM_122822.1,NM_201705.1,NM_122889.1,NM_148798.1,NM_148247.1,NM_148782.1,NM_113973.1,NM_180576.1,NM_179432.1,NM_179436.1,NM_126793.1,NM_116802.1,NM_147959.1,NM_103339.1,NM_148698.2,NM_122890.1,NM_126833.1,NM_122821.1,NM_147987.1,NM_103342.1,NM_119847.2,NM_103391.1,NM_103358.1,NM_…
82 24 NC_003071:3092026-3092173:1	CGGTACTCGACCCAGGTGGTCGAGTAGTGGGTCGAGTGACAAGTCGGAGTCTTCTTCTCTTTCTCATGCTCGAATGTCTGGTTGAGTGCGGAATCGAGAAGAATCTAAAGCGATGATGCTTTCTACTCGACCAGGGGGTCGAGTGGTG	TCTACTCGACCAGGGGGTCGAGTGG 0.975235 1	repeat_sense,igr_sense, NM_148526.1,NM_202235.1,NM_116794.1,NM_147956.1,NM_126781.1,NM_126888.1,NM_113972.1,NM_122822.1,NM_201705.1,NM_148798.1,NM_122889.1,NM_201713.1,NM_148247.1,NM_148782.1,NM_113973.1,NM_180576.1,NM_179432.1,NM_179436.1,NM_122815.1,NM_126793.1,NM_116802.1,NM_147959.1,NM_103339.1,NM_122890.1,NM_126833.1,NM_122821.1,NM_147987.1,NM_103342.1,NM_103391.1,NM_119847.2,NM_103358.1,NM_…
83 24 NC_003071:3092026-3092173:1	CGGTACTCGACCCAGGTGGTCGAGTAGTGGGTCGAGTGACAAGTCGGAGTCTTCTTCTCTTTCTCATGCTCGAATGTCTGGTTGAGTGCGGAATCGAGAAGAATCTAAAGCGATGATGCTTTCTACTCGACCAGGGGGTCGAGTGGTG	CTCGACCAGGGGGTCGAGTG 0.648179 0	repeat_sense,igr_sense, NM_148526.1,NM_202235.1,NM_116794.1,NM_126781.1,NM_147956.1,NM_126888.1,NM_113972.1,NM_122822.1,NM_201705.1,NM_201713.1,NM_148798.1,NM_148247.1,NM_148782.1,NM_113973.1,NM_179432.1,NM_179436.1,NM_122815.1,NM_126793.1,NM_116802.1,NM_103339.1,NM_126833.1,NM_122821.1,NM_147987.1,NM_103342.1,NM_103391.1,NM_103358.1,NM_122817.1,NM_126773.1,NM_147965.1,NM_180584.1, 983
84 24 NC_003071:3644791-3644897:1	GTGATGATACTCGACCCACTGGTCGAGTAACGTGGTAGAGTGAACGGCCGAGTGTGGTCAGGTGGTTTGGCGAAGTGATACTCGACCAGGGGGTCGAGTGGCGTCAT	TGATACTCGACCAGGGGGTCGAGTGG 0.715556 1	repeat_sense,igr_sense, NM_148526.1,NM_202235.1,NM_116794.1,NM_126781.1,NM_147956.1,NM_126888.1,NM_113972.1,NM_122822.1,NM_201705.1,NM_148798.1,NM_122889.1,NM_201713.1,NM_148247.1,NM_148782.1,NM_113973.1,NM_180576.1,NM_179432.1,NM_179436.1,NM_122815.1,NM_126793.1,NM_116802.1,NM_147959.1,NM_103339.1,NM_126833.1,NM_122890.1,NM_122821.1,NM_147987.1,NM_103342.1,NM_103391.1,NM_119847.2,NM_103358.1,NM_…
85 24 NC_003071:3644791-3644897:1	GTGATGATACTCGACCCACTGGTCGAGTAACGTGGTAGAGTGAACGGCCGAGTGTGGTCAGGTGGTTTGGCGAAGTGATACTCGACCAGGGGGTCGAGTGGCGTCAT	ACTCGACCAGGGGGTCGAGTGG 0.696332 1	repeat_sense,igr_sense, NM_148526.1,NM_202235.1,NM_116794.1,NM_126781.1,NM_147956.1,NM_126888.1,NM_113972.1,NM_122822.1,NM_201705.1,NM_148798.1,NM_122889.1,NM_201713.1,NM_148247.1,NM_148782.1,NM_180576.1,NM_113973.1,NM_179432.1,NM_179436.1,NM_122815.1,NM_126793.1,NM_116802.1,NM_147959.1,NM_103339.1,NM_122890.1,NM_126833.1,NM_122821.1,NM_147987.1,NM_103342.1,NM_119847.2,NM_103391.1,NM_103358.1,NM_…
86 24 NC_003071:3690872-3690992:1	GATACTCGACCAGGTGGTCGAGTGAAGTGATCGAGTGACTCTCATGGTGGTACTCGGCCAGGAGGTCGAGTGGTGAGGTGAATTGATGAAGTCTTCTACTCGACCAAGGGGTCGAGTGGTC	CTACTCGACCAAGGGGTCGAGTG 0.919137 0	repeat_sense,igr_sense, NM_148526.1,NM_202235.1,NM_116794.1,NM_126781.1,NM_147956.1,NM_126888.1,NM_113972.1,NM_122822.1,NM_201705.1,NM_148798.1,NM_122889.1,NM_201713.1,NM_148247.1,NM_148782.1,NM_180576.1,NM_113973.1,NM_104588.2,NM_179432.1,NM_123420.1,NM_179436.1,NM_126793.1,NM_116802.1,NM_147959.1,NM_122819.1,NM_103339.1,NM_148698.2,NM_122890.1,NM_126833.1,NM_122821.1,NM_147987.1,NM_103342.1,NM_…
87 24 NC_003071:3690956-3691047:1	GATGAAGTCTTCTACTCGACCAAGGGGTCGAGTGGTCTGTTGAGGTCGTGAAGCTTCTACTCGACCAGGGGGTCGAGTGGTTTGACATGATC	TCTACTCGACCAGGGGGTCGAGTGGTT 0.380726 0	repeat_sense,igr_sense, NM_148526.1,NM_202235.1,NM_116794.1,NM_126781.1,NM_147956.1,NM_126888.1,NM_113972.1,NM_122822.1,NM_201705.1,NM_122889.1,NM_201713.1,NM_148798.1,NM_148247.1,NM_148782.1,NM_113973.1,NM_180576.1,NM_179432.1,NM_179436.1,NM_122815.1,NM_126793.1,NM_116802.1,NM_147959.1,NM_103339.1,NM_126833.1,NM_122890.1,NM_122821.1,NM_147987.1,NM_103342.1,NM_103391.1,NM_119847.2,NM_103358.1,NM_…
88 24 NC_003071:3758821-3758898:1	GAGGGCACTCGACCTCGTGGTCGAGTGGTGAAGTGAAGTGGTGATGTCCTCTACTCGACCTGGGGGTCGAGTGGTCTC	TACTCGACCTGGGGGTCGAGTGG 0.214947 0	repeat_sense,cds_antisense,exon_antisense, NM_148526.1,NM_202235.1,NM_116794.1,NM_126781.1,NM_147956.1,NM_126888.1,NM_113972.1,NM_122822.1,NM_201705.1,NM_201713.1,NM_148798.1,NM_148247.1,NM_148782.1,NM_113973.1,NM_179432.1,NM_179436.1,NM_126793.1,NM_116802.1,NM_122819.1,NM_103339.1,NM_122830.1,NM_126833.1,NM_122821.1,NM_147987.1,NM_103342.1,NM_103391.1,NM_103358.1,NM_120741.2,NM_126773.1,NM_14796…
89 24 NC_003071:3780032-3780227:1	TGTCAGGAGATACTCGACTTCCAGGTTGAGTGACGAGGTCGAGTGGTTGTCTGATGATGGAGGTGAAGACACTCGACCTCATGGTCGAGTGATGTGATCGAGTGATGGAGATGAGGGCACCCGACCTCGTGGTCGAGTGGTGAAGTGAAGTGGTGATGTCCTCTACTCGACCTGGGGGTCGAGTGGTCTCTTGAGA	TACTCGACCTGGGGGTCGAGTGGT 0.282539 1	repeat_sense,igr_sense, NM_148526.1,NM_202235.1,NM_116794.1,NM_147956.1,NM_126781.1,NM_126888.1,NM_113972.1,NM_201705.1,NM_122822.1,NM_201713.1,NM_148798.1,NM_148247.1,NM_148782.1,NM_113973.1,NM_179432.1,NM_179436.1,NM_126793.1,NM_116802.1,NM_122819.1,NM_103339.1,NM_122830.1,NM_126833.1,NM_122821.1,NM_147987.1,NM_103342.1,NM_103391.1,NM_103358.1,NM_120741.2,NM_126773.1,NM_147965.1,NM_180584.1, 11…
90 24 NC_003071:3837609-3837680:1	ACCACTCGACCACGAGGTCGAGTAGATGACTTCACCACTTCACAACACCACTCGACCCCCTGGTCGAGTAGT	CACTCGACCCCCTGGTCGAGTA 0.295408 0	exon_sense,repeat_sense,cds_sense, NM_202235.1,NM_116794.1,NM_122820.1,NM_126781.1,NM_114067.1,NM_126888.1,NM_113972.1,NM_201705.1,NM_122822.1,NM_148798.1,NM_122889.1,NM_103402.1,NM_148782.1,NM_113973.1,NM_180576.1,NM_179432.1,NM_116802.1,NM_122819.1,NM_147959.1,NM_103339.1,NM_126833.1,NM_122890.1,NM_122821.1,NM_147987.1,NM_114100.1,NM_103342.1,NM_103391.1,NM_103358.1,NM_147971.1,NM_180578.1,NM_1…
91 24 NC_003071:3979959-3980043:1	GGCACTCGACCTCGTGGTCGAGTGATGTGATCGAGTGATGGTTTGGTGATGGAGATGAGGGCAGTCGACCTCGTGGTCGAGTGGT	TCGACCTCGTGGTCGAGTGG 0.429469 0	repeat_sense,igr_sense, NM_202235.1,NM_116794.1,NM_122820.1,NM_147956.1,NM_126781.1,NM_114067.1,NM_126888.1,NM_113972.1,NM_201705.1,NM_148798.1,NM_148247.1,NM_148782.1,NM_113973.1,NM_179432.1,NM_126793.1,NM_116802.1,NM_103339.1,NM_126833.1,NM_147987.1,NM_103342.1,NM_103391.1,NM_103358.1,NM_126773.1,NM_147965.1,NM_180584.1, 460
92 24 NC_003071:3980015-3980091:1	GAGGGCAGTCGACCTCGTGGTCGAGTGGTGAAGTGAAGTGGTGATGTCTTCTACTCGACCTGGGGTCGAGTGGTCTC	ACTCGACCTGGGGTCGAGTGGT 0.0828074 0	repeat_sense,igr_sense, NM_148526.1,NM_180575.1,NM_202235.1,NM_116794.1,NM_147956.1,NM_126781.1,NM_126888.1,NM_113972.1,NM_201705.1,NM_122822.1,NM_148798.1,NM_148247.1,NM_103143.2,NM_148782.1,NM_113973.1,NM_179432.1,NM_179436.1,NM_126793.1,NM_116802.1,NM_179407.2,NM_103339.1,NM_126833.1,NM_102953.3,NM_122821.1,NM_147987.1,NM_103342.1,NM_103391.1,NM_103358.1,NM_126773.1,NM_147965.1,NM_180584.1, 802
93 24 NC_003071:4140769-4140848:1	AGTGTTACTCGACCAGGTGGTCGAGTGGTGTCATCGAGTGGGCTAGACTGTGGTTACTCGACCATGGGGTCGAGTATATT	GTTACTCGACCATGGGGTCGAGTAT 0.795755 0	repeat_sense,igr_sense, NM_148526.1,NM_119977.3,NM_202235.1,NM_116794.1,NM_202974.1,NM_117637.3,NM_147956.1,NM_126781.1,NM_114067.1,NM_126888.1,NM_122822.1,NM_201705.1,NM_148798.1,NM_122889.1,NM_201713.1,NM_148247.1,NM_122828.1,NM_148782.1,NM_113973.1,NM_180576.1,NM_179432.1,NM_179436.1,NM_126793.1,NM_116802.1,NM_147959.1,NM_103339.1,NM_122890.1,NM_126833.1,NM_122821.1,NM_147987.1,NM_103342.1,NM_…
94 24 NC_003071:4225601-4225786:1	GTGAAGACACTCGACCTCGGGGTCGAGTGATGTGATCGAATGATGGTCAGGTGATGGGGATGAAGACACTCGACCTCGGGGTCGAGTGGTGAGGTGAAGTGGTGATGTCCTCTACTCGACCAGGGGGTCGAGTGGTCTGGTGAGGTTGTGAAGCGTCTACTCGACCTGGGGGTCGAGTGGTTTTGC	TACTCGACCTGGGGGTCGAGTGGT 0.141093 1	repeat_sense,igr_sense, NM_148526.1,NM_202235.1,NM_116794.1,NM_147956.1,NM_126781.1,NM_126888.1,NM_113972.1,NM_122822.1,NM_201705.1,NM_148798.1,NM_201713.1,NM_148247.1,NM_148782.1,NM_113973.1,NM_179432.1,NM_179436.1,NM_126793.1,NM_116802.1,NM_122819.1,NM_103339.1,NM_122830.1,NM_126833.1,NM_122821.1,NM_147987.1,NM_103342.1,NM_103391.1,NM_103358.1,NM_120741.2,NM_126773.1,NM_147965.1,NM_180584.1, 11…
95 24 NC_003071:4292564-4292737:1	CAGCTACTCGACCAGGGGGTCGAGTGGTGTTGTGAAGTGGGGAAGTCGTCTACTCGACCTTGTGGTTGAGTGGTGGATAGAATGTCGCAGTCGAGTGATTTGCTGTAGAGGTTGTGGCCGAGTACTTCCGGAACTTCAGGATGACTGTACTCGAGCTCGTGGTCGAGTATGTTG	TACTCGAGCTCGTGGTCGAGT 0.757119 1	repeat_sense,igr_sense, NM_148526.1,NM_202235.1,NM_116794.1,NM_122820.1,NM_147956.1,NM_126781.1,NM_114067.1,NM_101667.1,NM_126888.1,NM_113972.1,NM_111001.1,NM_201705.1,NM_148798.1,NM_148247.1,NM_113973.1,NM_179432.1,NM_179436.1,NM_116802.1,NM_103339.1,NM_126833.1,NM_147987.1,NM_114100.1,NM_103342.1,NM_103391.1,NM_103358.1,NM_113671.2,NM_180578.1,NM_126773.1,NM_147965.1,NM_180584.1, 325
96 132 NC_003071:4299447-4299531:1	TACTCAACTCAGGTGGTCGAGTGAATGGTCGAGTGATAAGCTGGAGTCTTCTTCTCTTCCTTGTGCTCGATTGTCTGGTTGAGTG	TGCTCGATTGTCTGGTTGAG 0.163022 0	repeat_sense,igr_sense, NM_202235.1,NM_116794.1,NM_147956.1,NM_126781.1,NM_126888.1,NM_113972.1,NM_201705.1,NM_106235.2,NM_201713.1,NM_148798.1,NM_148247.1,NM_122828.1,NM_113973.1,NM_179432.1,NM_147289.1,NM_126793.1,NM_116802.1,NM_126833.1,NM_147987.1,NM_103342.1,NM_124010.2,NM_126773.1,NM_147965.1,NM_180584.1, 349
97 28 NC_003071:4299472-4299567:1	TGGTCGAGTGATAAGCTGGAGTCTTCTTCTCTTCCTTGTGCTCGATTGTCTGGTTGAGTGCGGAATGGAGAAGACTCTGAAGCTGGCAGTCGAGTA	AGAAGACTCTGAAGCTGGCA 0.202134 1	repeat_sense,igr_sense, NM_148526.1,NM_179950.1,NM_147956.1,NM_126430.1,NM_201705.1,NM_201713.1,NM_128183.2,NM_123958.2,NM_126793.1,NM_126833.1,NM_126773.1,NM_121699.3, 99
98 24 NC_003071:4406734-4406876:1	ATGAAGGTACTCGACCACGTGGTTGAGTAGTGTGATCGAGTGAAGGTGATGTGGTGGACGTGATGATACTCGACCAGGGGGTCGAGTAATGTGATCGAGTGGTTGTCCAGGTGGTACTCGACCATGGGGTCGAGTGGTGACGT	TACTCGACCATGGGGTCGAGTGGTG 0.538192 1	repeat_sense,cds_antisense,exon_antisense, NM_148526.1,NM_119977.3,NM_202235.1,NM_116794.1,NM_202974.1,NM_147956.1,NM_126781.1,NM_114067.1,NM_126888.1,NM_113972.1,NM_122822.1,NM_201705.1,NM_201713.1,NM_122889.1,NM_148798.1,NM_148247.1,NM_122828.1,NM_148782.1,NM_180576.1,NM_113973.1,NM_179432.1,NM_179436.1,NM_126793.1,NM_116802.1,NM_147959.1,NM_103339.1,NM_122890.1,NM_126833.1,NM_122821.1,NM_14798…
99 88 NC_003071:4406719-4406890:1	GATCGAGTGAAGGTGATGAAGGTACTCGACCACGTGGTTGAGTAGTGTGATCGAGTGAAGGTGATGTGGTGGACGTGATGATACTCGACCAGGGGGTCGAGTAATGTGATCGAGTGGTTGTCCAGGTGGTACTCGACCATGGGGTCGAGTGGTGACGTGAAGTGCTGAGGTC	GGTCGAGTGGTGACGTGAAGTG 0.0788275 0	repeat_sense,cds_antisense,exon_antisense, NM_202235.1,NM_126781.1,NM_126888.1,NM_113972.1,NM_113973.1,NM_179432.1,NM_126793.1,NM_126833.1,NM_147987.1,NM_103342.1,NM_103391.1,NM_147965.1, 127
100 38 NC_003071:4407811-4407911:1	AGAGATGGTGTCGATCGACACCTTCCACTGTCGATCTGACACCCTACGGGACGCTCTTCTCTGAGACGAGCCAGTACGAAGGTGTCGATCGATACCCCTCT	CGAAGGTGTCGATCGATACCCCT 1.23805 0	repeat_sense,igr_sense, NM_114074.1,NM_126950.1,NM_114110.1,NM_122848.1,NM_148529.1,NM_126918.1, 152
101 24 NC_003071:4522201-4522275:1	AGACACTCGACCTCGCGGTCGAGTGGTGAGGTGAAGTGGTGATGTCCTCTAGTCGACCAGGGGGTCGAGTGGTCT	CTAGTCGACCAGGGGGTCGAGTGGT 0.268731 0	repeat_sense,igr_sense, NM_148526.1,NM_202235.1,NM_116794.1,NM_147956.1,NM_126781.1,NM_126888.1,NM_113972.1,NM_201705.1,NM_122822.1,NM_201713.1,NM_148798.1,NM_148247.1,NM_148782.1,NM_113973.1,NM_179432.1,NM_179436.1,NM_180713.1,NM_122815.1,NM_126793.1,NM_116802.1,NM_103339.1,NM_126833.1,NM_122821.1,NM_147987.1,NM_103342.1,NM_103391.1,NM_103358.1,NM_147281.1,NM_122817.1,NM_122032.2,NM_126773.1,NM_…
102 24 NC_003071:4522195-4522278:1	GGATGAAGACACTCGACCTCGCGGTCGAGTGGTGAGGTGAAGTGGTGATGTCCTCTAGTCGACCAGGGGGTCGAGTGGTCTGCT	TCGACCAGGGGGTCGAGTGGTCT 0.23809 0	repeat_sense,igr_sense, NM_148526.1,NM_202235.1,NM_116794.1,NM_126781.1,NM_147956.1,NM_126888.1,NM_113972.1,NM_201705.1,NM_201713.1,NM_148798.1,NM_148247.1,NM_148782.1,NM_113973.1,NM_179432.1,NM_124806.1,NM_179436.1,NM_122815.1,NM_126793.1,NM_116802.1,NM_103339.1,NM_126833.1,NM_147987.1,NM_103342.1,NM_103391.1,NM_103358.1,NM_122817.1,NM_126773.1,NM_147965.1,NM_180584.1, 672
103 24 NC_003071:4522138-4522323:1	GTGAAGACACTCGACCTTGGGGTCGAGTGATGTGATCGAGTGATGGTCATGTGATGGGGATGAAGACACTCGACCTCGCGGTCGAGTGGTGAGGTGAAGTGGTGATGTCCTCTAGTCGACCAGGGGGTCGAGTGGTCTGCTGAGGTTGTGAAGCTTCTACTCGACCAGGGGGTCGAGTGGTTTTGC	TACTCGACCAGGGGGTCGAGTG 0.455375 1	repeat_sense,igr_sense, NM_148526.1,NM_202235.1,NM_116794.1,NM_126781.1,NM_147956.1,NM_126888.1,NM_113972.1,NM_122822.1,NM_201705.1,NM_148798.1,NM_122889.1,NM_201713.1,NM_148247.1,NM_148782.1,NM_113973.1,NM_180576.1,NM_179432.1,NM_179436.1,NM_122815.1,NM_126793.1,NM_116802.1,NM_147959.1,NM_103339.1,NM_122890.1,NM_126833.1,NM_122821.1,NM_147987.1,NM_103342.1,NM_103391.1,NM_119847.2,NM_103358.1,NM_…
104 183 NC_003071:4529247-4529364:1	TCTGGTAATGGAGGTGAAGATACTCGACCTCGGGGTCGAGTGATGTGATCGAGTGATGGTCAGGTGATGGGAATGAAGACACTCGACCGCGAGGTCGAGTGTCTTCTACTCGACCAGG	GAGGTCGAGTGTCTTCTACT 0.133226 0	repeat_sense,igr_sense, NM_122822.1,NM_103402.1,NM_122821.1,NM_115776.2, 67
105 24 NC_003071:4529203-4529381:1	GGTGATACTCGACTTCAAGGTAGAGTGGTGAGATCGAGTAGTGGTCTGGTAATGGAGGTGAAGATACTCGACCTCGGGGTCGAGTGATGTGATCGAGTGATGGTCAGGTGATGGGAATGAAGACACTCGACCGCGAGGTCGAGTGTCTTCTACTCGACCAGGGGGTCGAGTGGTCTGCT	TACTCGACCAGGGGGTCGAGTGGT 0.240451 1	repeat_sense,igr_sense, NM_148526.1,NM_202235.1,NM_116794.1,NM_126781.1,NM_147956.1,NM_126888.1,NM_113972.1,NM_201705.1,NM_122822.1,NM_122889.1,NM_148798.1,NM_201713.1,NM_148247.1,NM_148782.1,NM_180576.1,NM_113973.1,NM_179432.1,NM_179436.1,NM_122815.1,NM_126793.1,NM_116802.1,NM_147959.1,NM_103339.1,NM_122890.1,NM_126833.1,NM_122821.1,NM_147987.1,NM_103342.1,NM_119847.2,NM_103391.1,NM_103358.1,NM_…
106 24 NC_003071:4602130-4602204:1	GTTACTCGACCCAGTGGTCGAGTGGTGTCATCGAGTAGCATGGAGTGTGGTTACTCGACCAGGGGGTCGAGTGAT	GTTACTCGACCAGGGGGTCGAGTG 0.606645 0	repeat_sense,igr_sense, NM_148526.1,NM_202235.1,NM_116794.1,NM_126781.1,NM_147956.1,NM_126888.1,NM_113972.1,NM_122822.1,NM_201705.1,NM_148798.1,NM_122889.1,NM_201713.1,NM_148247.1,NM_148782.1,NM_113973.1,NM_180576.1,NM_179432.1,NM_179436.1,NM_122815.1,NM_126793.1,NM_116802.1,NM_147959.1,NM_103339.1,NM_122890.1,NM_126833.1,NM_122821.1,NM_147987.1,NM_103342.1,NM_103391.1,NM_119847.2,NM_103358.1,NM_…
107 24 NC_003071:4602130-4602204:1	GTTACTCGACCCAGTGGTCGAGTGGTGTCATCGAGTAGCATGGAGTGTGGTTACTCGACCAGGGGGTCGAGTGAT	CTCGACCAGGGGGTCGAGTG 0.214645 0	repeat_sense,igr_sense, NM_148526.1,NM_202235.1,NM_116794.1,NM_147956.1,NM_126781.1,NM_126888.1,NM_113972.1,NM_122822.1,NM_201705.1,NM_148798.1,NM_201713.1,NM_148247.1,NM_148782.1,NM_113973.1,NM_179432.1,NM_179436.1,NM_122815.1,NM_126793.1,NM_116802.1,NM_103339.1,NM_126833.1,NM_122821.1,NM_147987.1,NM_103342.1,NM_103391.1,NM_103358.1,NM_122817.1,NM_126773.1,NM_147965.1,NM_180584.1, 983
108 38 NC_003071:4847918-4848057:1	GATCGATACACCAGGGTGTCGATCGACACCAGTTACTCTTGACGCCTCTGTTTTTCCTTTGTCGAGTGGAATTGACAATTTTGCGGAGGAGGAGGAAACTATTCATGATGGTGTCGATCGACACCCAAGTCCTGTCGATC	TGGTGTCGATCGACACCCAAGT 1.16143 1	repeat_sense,igr_sense, NM_147943.1,NM_114016.1,NM_114102.1,NM_147252.1,NM_126896.1,NM_148519.1,NM_126950.1,NM_114079.1,NM_148282.1,NM_103410.1,NM_122848.1,NM_148529.1,NM_126918.1, 474
109 24 NC_003071:5195480-5195561:1	TGATGATACTTGACCACAGGGTCGAGTGGTGGTGTGAAGTGATGAGGCCTTCTACTCGACCAGGGGGTCGAGTGGTTTGTTA	TCTACTCGACCAGGGGGTCGAGTGGT 0.82367 0	repeat_sense,igr_sense, NM_148526.1,NM_202235.1,NM_116794.1,NM_147956.1,NM_126781.1,NM_126888.1,NM_113972.1,NM_122822.1,NM_201705.1,NM_122889.1,NM_148798.1,NM_201713.1,NM_148247.1,NM_148782.1,NM_180576.1,NM_113973.1,NM_179432.1,NM_179436.1,NM_122815.1,NM_126793.1,NM_116802.1,NM_147959.1,NM_103339.1,NM_122890.1,NM_126833.1,NM_122821.1,NM_147987.1,NM_103342.1,NM_119847.2,NM_103391.1,NM_103358.1,NM_…
110 24 NC_003071:5195478-5195560:1	GATGATGATACTTGACCACAGGGTCGAGTGGTGGTGTGAAGTGATGAGGCCTTCTACTCGACCAGGGGGTCGAGTGGTTTGTT	CTCGACCAGGGGGTCGAGTGGT 0.37028 1	repeat_sense,igr_sense, NM_148526.1,NM_202235.1,NM_116794.1,NM_147956.1,NM_126781.1,NM_126888.1,NM_113972.1,NM_122822.1,NM_201705.1,NM_148798.1,NM_201713.1,NM_148247.1,NM_148782.1,NM_113973.1,NM_179432.1,NM_179436.1,NM_122815.1,NM_126793.1,NM_116802.1,NM_103339.1,NM_126833.1,NM_122821.1,NM_147987.1,NM_103342.1,NM_103391.1,NM_103358.1,NM_122817.1,NM_126773.1,NM_147965.1,NM_180584.1, 996
111 24 NC_003071:5195485-5195600:1	ATACTTGACCACAGGGTCGAGTGGTGGTGTGAAGTGATGAGGCCTTCTACTCGACCAGGGGGTCGAGTGGTTTGTTAAAGTCGTGAAGCCATCTACTCGGCCATGGGGTCGAGTGT	CTACTCGGCCATGGGGTCGA 0.136083 0	repeat_sense,igr_sense, NM_148526.1,NM_116794.1,NM_126781.1,NM_147956.1,NM_148798.1,NM_148247.1,NM_179436.1,NM_126793.1,NM_116802.1,NM_103339.1,NM_126833.1,NM_147987.1,NM_103342.1,NM_202830.1,NM_103391.1,NM_103358.1,NM_126773.1,NM_180584.1, 118
112 2 NC_003071:5451436-5451531:1	TCGCAAATCCGTCGCAGTTATTGCGAGGGAAGTACTAGGCAAGCGTGTGATTTGCGAGGAAAACAGTTCCTCGCAAAAATTGCGAGGGAATTGCGA	CCTCGCAAAAATTGCGAGGGAA 1.17458 1	repeat_sense,igr_sense, NM_104162.1,NM_122762.1, 126
113 184 NC_003071:5541217-5541357:1	TCGGTGGTCGTTCGAGAGGTCGCTTTGGGCAACCGGTGTATTCTGGCTCGGGACATGCTGGATGACTCTTCATTGAAATTGGTTGACTATCTCCCGAGGCGATACAAGCGGTTCCCAAAGCGTTTTCTCGATCGGCTCGGA	GGTTCCCAAAGCGTTTTCTCGAT 0.581312 1	igr_sense, NM_116537.3,NM_122766.1,NM_118744.1,NM_115242.1,NM_118886.1,NM_113246.3,NM_102530.2,NM_180567.1,NM_148098.1,NM_102836.2,NM_100951.3,NM_116299.2,NM_118249.3,NM_105028.2,NM_101040.2,NM_114571.1, 8
114 24 NC_003071:5572426-5572503:1	GAGACCACTCGACAACCAGGTCGAGTAGAGCACATCACCACTTCACCTCACCACTCGACCCCGAGGTCGAGTGCCATC	CCACTCGACCCCGAGGTCGAGTG 0.256324 0	repeat_sense,igr_sense, NM_148526.1,NM_202235.1,NM_116794.1,NM_122820.1,NM_147956.1,NM_126781.1,NM_114067.1,NM_126888.1,NM_113972.1,NM_122822.1,NM_201705.1,NM_122889.1,NM_148798.1,NM_148247.1,NM_148782.1,NM_113973.1,NM_180576.1,NM_179432.1,NM_179436.1,NM_100205.3,NM_126793.1,NM_116802.1,NM_122819.1,NM_147959.1,NM_103339.1,NM_114441.1,NM_122890.1,NM_126833.1,NM_122821.1,NM_147987.1,NM_130345.2,NM_…
115 185 NC_003071:6397472-6397579:1	CTTCACTACCGAACGATTCTTCACCAATTTTTTTTTTTCCCATCTTTTCATCATTTAATGTGCAATTTCTTAGATTGTGAATTGGTGGAGAATCGTTCGGTAGTGAAG	TTGGTGGAGAATCGTTCGGT 1.2613 1	igr_sense, NM_120795.2,NM_125336.2,NM_111483.2,NM_104072.1,NM_118674.3,NM_202506.1, 5
116 186 NC_003071:7228488-7228604:1	TTCCGACGTCTTTAGCGACAGAGAGGTTGTTGAGCTCGAGCTGGTTGAGATTCATGAGAGACTTAAGAGCACCGGAGTAGTTTGAAAAAGTGTAGTTGTTGCCGGAGATGGATTGAA	AGTGTAGTTGTTGCCGGAGA 0.0542806 0	cds_antisense,exon_antisense, NM_125273.2,NM_115600.4,NM_126453.2,NM_125299.2,NM_120267.2,NM_114552.2,NM_112184.2,NM_125302.3,NM_129745.2,NM_101743.2,NM_127218.3,NM_124629.2,NM_123185.1,NM_106162.1,NM_123186.1,NM_102593.3,NM_119661.2, 9
117 187 NC_003071:10725178-10725274:1	GTAGTTTTCCAATAGGTCGAGCATGTGCTGAAACTGTGTGTACAGAGTTCTCATAAACACACAGTTTCAGCATATGCTGGATCTACTTGAAGACTAC	TCAGCATATGCTGGATCTACT 0.0769521 1	intron_sense, NM_117185.3,NM_106025.3,NM_179668.1,NM_122611.2,NM_124634.2,NM_103090.3,NM_114287.2, 4
118 188 NC_003071:11419341-11419504:1	TATGCATGCAGGCACTACAGGCACTGAAAATGTTGCTCCGGAACATAATGTAGCTCCAGGAAATATATCCTTGAAAATGAAGCTCATGTCTGGTTTCTGTCGTTCTATCGCAGCTGCAAATAGTTTTCCTGCAACATTGCAGTGCATATTTGGCTGCATGTATG	TGCAGTGCATATTTGGCTGCA 0.0589737 0	exon_sense,cds_sense, NM_125899.2, 4
119 189 NC_003071:12860607-12860746:1	GCTTCCTTTGGGTTCTTAGTCCACTCAGGTATCGGGATCCCAAATGTCTCTGCTCGTAAAATAGCAGTCGCTGTGATAAAGTTAAGGAGACTTGGGTCGGACGACGAGTACTGGAGTGGACGAGGGAATCTTTTTGGAGC	TGGAGTGGACGAGGGAATCT 0.290659 0	cds_antisense,exon_antisense, NM_120729.2,NM_128566.3,NM_112583.1,NM_114124.1, 2
120 190 NC_003071:13668215-13668307:1	CTGCGGTTGCGACAGCGGCTGCGGCAACGTTGGCGGCGACGAAACGAACAACAACCTGCGGCAGTGTTACCGTTGCCGCTGCCGCAACCGCAG	TGTTACCGTTGCCGCTGCCGC 0.0628895 1	igr_sense, NM_121825.1,NM_180125.1,NM_105285.2,NM_121833.2,NM_125446.2,NM_117158.2,NM_120133.2,NM_125817.2,NM_117448.2, 6
121 66 ath-MIR399e NC_003071:14450583-14450690:1	GAAAGCATTACAGGGCGAATCCTCTATTGGCAGTGGAAGTTGATGACCCTTATATGTTATTTTCTCATCATTTTCCTCTGCCAAAGGAGATTTGCCTCGCAATGCTTC	CTCTGCCAAAGGAGATTTGCCTCG 0.48044 1	igr_sense, HASH(0xa167648) NM_179887.1,NM_123694.2,NM_111416.2,NM_116428.2,NM_123353.2,NM_102822.1,NM_116561.1,NM_101674.3,NM_126801.1, 14
122 66 ath-MIR399f NC_003071:14452084-14452185:1	TACAGGGCAAGATCACCATTGGCAGAGATCTATTACTTCATTCTTGCATCATATGCATAAATGTTTGTGGTGAGCTCTCTGCCAAAGGAGATTTGCCCGGTA	CTCTGCCAAAGGAGATTTGCCCGG 0.807865 1	igr_sense, HASH(0xa17c920) NM_179887.1,NM_111526.3,NM_116428.2,NM_123353.2,NM_102822.1,NM_116561.1,NM_121010.2,NM_126801.1, 12
123 191 NC_003071:16069049-16069119:1	AAGCTCAGGAGGGATAGCGCCATGATGATCACATTCGTTATCTATTTTTTGGCGCTATCCATCCTGAGTTT	TTTGGCGCTATCCATCCTGA 0.826158 0	igr_sense, NM_104587.1, 3
124 192 NC_003071:16069032-16069138:1	GTAGAGAAGAATCTGTAAAGCTCAGGAGGGATAGCGCCATGATGATCACATTCGTTATCTATTTTTTGGCGCTATCCATCCTGAGTTTCATTGGCTCTTCTTACTAC	TCCTGAGTTTCATTGGCTCT 0.0931048 1	igr_sense, NM_115592.3,NM_119608.3,NM_179233.1,NM_202953.1,NM_179232.1,NM_103993.2,NM_114689.2, 3
125 193 NC_003071:16347357-16347441:1	GTATGCCTGGCTCCCTGTATGCCATATGCTGAGCCCATCGAGTATCGATGACCTCCGTGGATGGCGTATGAGGAGCCATGCATAT	GATGGCGTATGAGGAGCCAT 0.384468 1	igr_sense, NM_148437.1,NM_119895.2,NM_114568.3,NM_116311.2, 2
126 80 NC_003071:16659180-16659310:1	GAGGAAGGATCCAAAGGGATCGCATTGATCCTAATTAAGGTGAATTCTCCCCATATTTTCTTTATAATTGGCAAATAAATCACAAAAATTTGCTTGGTTTTGGATCATGCTATCTCTTTGGATTCATCCTT	GATCATGCTATCTCTTTGGA 0.0150235 1	igr_sense, NM_120085.3,NM_116554.2,NM_127474.2, 4
127 126 ath-MIR319c NC_003071:17036779-17036977:1	TAGATATAGAAGGAGATTCTTTCAGTCCAGTCATGGATAGAAAAAGAAGAGGGTAGAAATATCTGCCGACTCATCCATCCAAACACTCGTGGTAGAGAAACGATAAATTTAAACCGCAGTGACTGTGTGAATGATGCGGGAGATATTTTTGATCCTTCTTTATCTGTGTTTGGACTGAAGGGAGCTCCTTCTTTTTCTA	TTTGGACTGAAGGGAGCTCCT 0.14047 1	igr_sense, HASH(0xa18eee8) NM_111977.3,NM_124884.1,NM_111520.4,NM_179399.1,NM_120692.2,NM_180448.1,NM_117950.4,NM_128252.1,NM_115910.1,NM_102760.1, 14
128 126 ath-MIR159c NC_003071:19001712-19001922:1	AGAAGGAGCTCCCTTCCTCCAAAACGAAGAGGACAAGATTTGAGGAACTAAAATGCAGAATCTAAGAGTTCATGTCTTCCTCATAGAGAGTGCGCGGTGTTAAAAGCTTGAAGAAAGCACACTTTAAGGGGATTGCACGACCTCTTAGATTCTCCCTCTTTCTCTACATATCATTCTCTTCTCTTCGTTTGGATTGAAGGGAGCTCCTTTT	TTTGGATTGAAGGGAGCTCCT 0.507632 0	igr_sense, HASH(0xa1a5fc0) NM_111977.3,NM_124884.1,NM_120692.2,NM_102864.2,NM_118867.1,NM_180448.1,NM_128805.3,NM_118827.1,NM_128252.1,NM_115910.1, 17
129 122 ath-MIR166a NC_003071:19183189-19183338:1	CTTTTGAGGGGACTGTTGTCTGGCTCGAGGACTCTGGCTCGCTCTATTCATGTTGGATCTCTTTCGATCTAACAATCGAATTGAACCTTCAGATTTCAGATTTGATTAGGGTTTTAGCGTCTTCGGACCAGGCTTCATTCCCCCCAATTG	TCGGACCAGGCTTCATTCCCC 1	igr_sense, HASH(0xa1a1388) NM_104096.2,NM_179464.1,NM_124302.1,NM_125462.2,NM_119441.3,NM_106374.2,NM_129025.2,NM_102785.3, 11
130 194 ath-MIR408 NC_003071:19326937-19327021:1	CAGGGAACAAGCAGAGCATGGATTGAGTTTACTAAAACATTAAACGACTCTGTTTTGTCTCTACCCATGCACTGCCTCTTCCCTG	ATGCACTGCCTCTTCCCTGGCT 0.214322 1	utr_antisense,exon_antisense, HASH(0xa1b77ac) NM_201977.1,NM_120795.2,NM_126340.1,NM_124373.2,NM_128574.1,NM_130043.2,NM_130270.3,NM_120621.1,NM_180663.1,NM_111087.3,NM_101159.1,NM_117272.2, 4
131 195 ath-MIR403 NC_003071:19422133-19422256:1	AGAGTCGTATTACATGTTTTGTGCTTGAATCTAATTCAACAGGCTTTATGTAAGAGATTCTTTAACAATTCCTATAATCTTTGTTGTTGGATTAGATTCACGCACAAACTCGTAATCTGTCTTT	TTAGATTCACGCACAAACTCG 1	igr_sense, NM_118271.1,NM_101257.2,NM_102309.3, 5
132 196 NC_003071:19577140-19577239:1	TTGACAATGGCTGAAGATGAAATAGTAGTCGAAGAAGAGCAATCACAGCCACAGGAGATTACTCCAGTTCCACCATCTTCTTCGTCTTCGCCTTCGTTAG	ACCATCTTCTTCGTCTTCGCC 0.0225472 0	exon_sense,cds_sense, NM_179519.1,NM_126078.1,NM_113544.2,NM_115371.2,NM_179503.1,NM_125988.1,NM_104602.1,NM_126226.3,NM_180551.1,NM_100153.2,NM_105724.2,NM_101894.3,NM_120430.1,NM_118153.1,NM_100146.2,NM_116099.1,NM_100626.2,NM_103946.2,NM_124739.2,NM_112691.1,NM_179340.1,NM_104588.2,NM_121937.2,NM_103693.2,NM_119974.2,NM_117386.3,NM_117764.3,NM_105577.2,NM_130323.2,NM_104867.1,NM_101479.1,NM_11…
133 197 NC_003074:73000-73063:1	GCACAGCTGCTGTAGCCGCAGCCACCATTACAGGGAAAGTGGCTGCAGCTGCAGCGACTAGTGT	AGTGGCTGCAGCTGCAGCGACT 0.287703 0	exon_sense,cds_sense, NM_202725.1,NM_121818.2,NM_123208.1,NM_105008.2,NM_113188.2,NM_110987.2,NM_118642.2,NM_116485.2,NM_124389.1,NM_101258.1,NM_115665.4,NM_122927.2,NM_120524.2,NM_114561.2,NM_125676.3,NM_111610.3,NM_129125.1,NM_118408.2,NM_202724.1,NM_179110.1,NM_116124.1,NM_101718.3,NM_100843.2,NM_179109.1,NM_113603.3,NM_122380.2, 9
134 198 NC_003074:575067-575201:1	ATTTCTTGTGGAGAGGAAGCAAGAGGATGTGCTTGGTTGTGGAAATATAGGGCCCTTAAAATATATTCATCGTATTCACTCACATAACAAAAATTCCACAAGTAAGCACATCATCTTGCTTCCTCCACAAGAAAT	GCACATCATCTTGCTTCCTC 0.683742 1	igr_sense, NM_120478.1,NM_106336.3,NM_101165.2,NM_121750.2,NM_147858.1,NM_125221.1,NM_116386.2,NM_124956.1,NM_114050.1, 5
135 199 NC_003074:575062-575206:1	TTGTAATTTCTTGTGGAGAGGAAGCAAGAGGATGTGCTTGGTTGTGGAAATATAGGGCCCTTAAAATATATTCATCGTATTCACTCACATAACAAAAATTCCACAAGTAAGCACATCATCTTGCTTCCTCCACAAGAAATTACAA	ATCATCTTGCTTCCTCCACAA 0.278073 1	igr_sense, NM_118853.1,NM_120151.2,NM_100361.3,NM_121661.2,NM_130151.2,NM_202457.1,NM_112229.2,NM_119171.1,NM_180177.1,NM_114860.2,NM_119162.2,NM_179692.1,NM_119375.1,NM_121067.3,NM_103879.1,NM_130015.2,NM_120666.1,NM_105786.2,NM_101989.3,NM_128210.3,NM_111258.3,NM_114815.1,NM_148707.1,NM_112498.1,NM_202148.1,NM_100150.2,NM_122200.2,NM_128264.2,NM_106646.2, 8
136 200 NC_003074:690671-690901:1	TCTTGTTGGTACGAGGATAAAACCGAGTGGGGATCTCGGATCGGTTGGATTTATGGATCTGTCACGGAAGATGTGGTCACAGGTTATAGAATGCATAACCGAGGCTGGAAATCGGTTTACTGTGTGACCAAAAGGGATGCTTTCCGTGGCACAGCTCCAATCAACTTGACGGATAGGCTTCACCAGGTTCTCCGATGGGCTACTGGCTCGGTAGAGATCTTCTTCTCAAGA	CTCGGTAGAGATCTTCTTCTC 0.0558543 0	exon_sense,cds_sense, NM_128614.3,NM_125982.1,NM_105507.1,NM_179816.1,NM_124610.2,NM_127615.2,NM_115283.1,NM_179132.1,NM_118955.2,NM_114385.2, 9
137 201 NC_003074:2079510-2079606:1	GCGAGAAGGTCTAAGAAGAGAGATCCAATGGCTCCATCGACGTTGAGTACCAGGTTGTTGGCTTTAGACAGTGTGTATGTCTCTACTTGGACTGCGT	GTGTGTATGTCTCTACTTGGAC 0.127612 0	cds_antisense,exon_antisense, NM_115110.2,NM_111541.2,NM_102235.2,NM_111869.3, 6
138 202 NC_003074:5649368-5649481:1	ATGGGCCTTACAGCACCGCCAATGGTAAGAAGATCTTCCAAGGTTTCTACACTGTGCTATATTCATGGACATCATGTACGTGCTCTTACCATTGGAAAGTGCTCTAAGGCCCAT	ACCATTGGAAAGTGCTCTAA 0.0959286 1	igr_sense, NM_112183.2,NM_122954.2, 5
139 203 ath-MIR418 NC_003074:6516224-6516296:1	TTTAAATTTAGAATCTAGCGTAAAAAGAAAATCCGAATCAGGAACTCTAATGTGATGATGAACTGACCTTAGA	TAATGTGATGATGAACTGACC 0	igr_sense, NM_104221.2,NM_118007.3,NM_102420.3,NM_101389.2,NM_111970.2,NM_115677.1, 2
140 204 NC_003074:11275556-11275779:1	GTTTTTAATATTTGGTGTGGCAGAAGGAGCATGTGGTTACGGAGATCTATTCAAACAAGGTTACGGCTTAGAGACAGCTGCACTAAGCACTGCTCTTTTCAACAATGGCCAGACTTGTGGTGCTTGTTTCGAGCTCATGTGTGTTAGCTCAAAGTGGTGCAAACCAAACGCTGGTTCAATCAAAATCACAGCCACTAATTTTTGCCCACCAAATTATCAAGAAC	TGCCCACCAAATTATCAAGA 0.0391275 0	igr_sense, NM_129366.1, 3
141 205 NC_003074:11416884-11417034:1	CTCGTGTTCGGTTTTGGGTCGGATTCGGTTCAGGTTCGGGTTCGAGTTTGGGTTTATTTATATATAGAACGGGTCTTAAATTTCTAAACCCGAAAAACTCGAACCCAAAATACCTGACCCAAACCCGACCCGAATACCCGAACGCCTAGAG	CCGACCCGAATACCCGAACG 0.189381 1	repeat_sense,igr_sense, NM_128448.3,NM_128727.1,NM_106247.2,NM_123347.1,NM_128265.1,NM_118409.1, 59
142 38 NC_003074:11496030-11496140:1	GGTGTTGGTGTCGATCGACACCTCTGTTGTGTCGTTCGACACCTATTGCATTTGCGTGCTGCTCCCGATGGTGTCGATCGACACCCAGTTGGTGTCGCTCGACACCGAGCC	AGTTGGTGTCGCTCGACACC 0.0950849 1	repeat_sense,igr_sense, NM_126896.1,NM_126950.1,NM_111421.2,NM_147252.1,NM_148529.1,NM_103410.1,NM_122848.1,NM_126918.1, 202
143 206 NC_003074:11515664-11515770:1	GACCAAGTGGTCGATTGCGTGGTCGATTGCGTGGTCGATTGGTCAGGACCAGAGCTACGAAGAAAATTTAAATCTACCAAAGTGGTCGATTGCGTGGTCGATTGGTC	GTGGTCGATTGCGTGGTCGA 0.187898 0	repeat_sense,igr_sense, NM_113972.1,NM_148798.1,NM_147956.1,NM_201713.1,NM_126833.1,NM_147987.1,NM_103342.1,NM_126781.1,NM_113973.1,NM_147965.1, 47
144 24 NC_003074:11555941-11556015:1	AGACACTCGACCTCGTGGTCGAGTGGTGAGGTGAAGTGGTGATGTCCTCTACTCGACCAGGGGGTCGAGTGGTCT	CTACTCGACCAGGGGGTCGAGTG 0.640833 0	repeat_sense,igr_sense, NM_126793.1,NM_103358.1,NM_122817.1,NM_180584.1,NM_116794.1,NM_113972.1,NM_201705.1,NM_148798.1,NM_148247.1,NM_103339.1,NM_122890.1,NM_119847.2,NM_103391.1,NM_148526.1,NM_147956.1,NM_126888.1,NM_201713.1,NM_148782.1,NM_180576.1,NM_179436.1,NM_122815.1,NM_116802.1,NM_126833.1,NM_147987.1,NM_103342.1,NM_147971.1,NM_202235.1,NM_126781.1,NM_122822.1,NM_122889.1,NM_113973.1,NM_…
145 24 NC_003074:11555878-11556063:1	GTGAAGACACTCGACCTCGGGGTCGAGTGATGTGATCGAGTGGTGGTAAGGTGATGGAGATGAAGACACTCGACCTCGTGGTCGAGTGGTGAGGTGAAGTGGTGATGTCCTCTACTCGACCAGGGGGTCGAGTGGTCTGCTGAGGTTGTGAATCGTCTACTCGACCTAGGGGTCGAGTGGTTTTGC	CTACTCGACCTAGGGGTCGAGTGGT 0.194927 1	repeat_sense,igr_sense, NM_126793.1,NM_103358.1,NM_180584.1,NM_116794.1,NM_113972.1,NM_201705.1,NM_148798.1,NM_148247.1,NM_122819.1,NM_103339.1,NM_103391.1,NM_148526.1,NM_147956.1,NM_126888.1,NM_201713.1,NM_148782.1,NM_179436.1,NM_116802.1,NM_126833.1,NM_147987.1,NM_103342.1,NM_202235.1,NM_126781.1,NM_122822.1,NM_113973.1,NM_179432.1,NM_122821.1,NM_126773.1,NM_147965.1, 1133
146 54 NC_003074:11714054-11714135:1	CCCTCGCAAATTTGCGACGTTTTTGCGGGGAATCATGACTTCCACGCAGTTTCCTCGCAATTGTCTCGCAAATTTGCGAGGG	CCTCGCAATTGTCTCGCAAATTTG 0.600228 1	exon_sense,repeat_sense,cds_sense, NM_121049.3,NM_104162.1,NM_147313.1,NM_103854.2, 46
147 24 NC_003074:12051638-12051795:1	GATGGTGATACTCGACTTCCGGGTAGAGTGATGAGGTCGAGTAGTGGTCTGGCAATGGGATGAAGATCGAGTGGTGTGATGGTGATACTCGACGTGATCGAGTGGTGGTCAGAAGATGGAGATGAAGTCACTCGACCTGGGGGTCGAGTGATGTGATC	AAGTCACTCGACCTGGGGGTCGAGT 0.0986938 1	repeat_sense,igr_sense, NM_126793.1,NM_122830.1,NM_103358.1,NM_180584.1,NM_116794.1,NM_113972.1,NM_201705.1,NM_148798.1,NM_148247.1,NM_122819.1,NM_103339.1,NM_103391.1,NM_148526.1,NM_147956.1,NM_126888.1,NM_201713.1,NM_148782.1,NM_179436.1,NM_116802.1,NM_126833.1,NM_147987.1,NM_103342.1,NM_202235.1,NM_126781.1,NM_122822.1,NM_113973.1,NM_179432.1,NM_122821.1,NM_126773.1,NM_147965.1, 1071
148 24 NC_003074:12051637-12051796:1	TGATGGTGATACTCGACTTCCGGGTAGAGTGATGAGGTCGAGTAGTGGTCTGGCAATGGGATGAAGATCGAGTGGTGTGATGGTGATACTCGACGTGATCGAGTGGTGGTCAGAAGATGGAGATGAAGTCACTCGACCTGGGGGTCGAGTGATGTGATCG	CACTCGACCTGGGGGTCGAGTGAT 0.0807121 1	repeat_sense,igr_sense, NM_126793.1,NM_122830.1,NM_103358.1,NM_180584.1,NM_116794.1,NM_113972.1,NM_201705.1,NM_148798.1,NM_148247.1,NM_122819.1,NM_103339.1,NM_103391.1,NM_148526.1,NM_147956.1,NM_126888.1,NM_201713.1,NM_148782.1,NM_179436.1,NM_116802.1,NM_126833.1,NM_147987.1,NM_103342.1,NM_202235.1,NM_126781.1,NM_122822.1,NM_113973.1,NM_179432.1,NM_122821.1,NM_126773.1,NM_147965.1, 1100
149 24 NC_003074:12051860-12051949:1	GTGGTGTCTTCTACTCGGCCTAGGGGTCGAGTGGTCTCTTGAGATCTTGAAGCTCCTACTCGACCTCTAGGTCGAGTGGTTTGTCATGAT	TACTCGACCTCTAGGTCGAGTGGT 0.580103 0	repeat_sense,igr_sense, NM_122820.1,NM_103358.1,NM_180584.1,NM_116794.1,NM_113972.1,NM_148798.1,NM_148247.1,NM_122819.1,NM_103339.1,NM_122890.1,NM_103391.1,NM_148526.1,NM_147956.1,NM_114067.1,NM_126888.1,NM_201713.1,NM_148782.1,NM_180576.1,NM_179436.1,NM_116802.1,NM_126833.1,NM_147987.1,NM_103342.1,NM_147971.1,NM_202235.1,NM_102413.1,NM_126781.1,NM_122822.1,NM_122889.1,NM_122828.1,NM_113973.1,NM_…
150 24 NC_003074:12051858-12051951:1	TGGTGGTGTCTTCTACTCGGCCTAGGGGTCGAGTGGTCTCTTGAGATCTTGAAGCTCCTACTCGACCTCTAGGTCGAGTGGTTTGTCATGATCA	ACCTCTAGGTCGAGTGGTTTG 0.17208 1	repeat_sense,igr_sense, NM_116794.1,NM_104275.1,NM_113972.1,NM_148798.1,NM_122819.1,NM_103391.1,NM_147956.1,NM_115870.2,NM_126888.1,NM_147987.1,NM_103342.1,NM_202235.1,NM_113973.1,NM_179432.1,NM_147965.1, 106
151 24 NC_003074:12215633-12215827:1	GGAGGTACTCGACCTCTAGGTAGAGTGAGGAGGTCGAGTGGTTGTCTGATGATGGAGGTGAAGACACTCGTCCTCATGGTCGAGTGAAGTGATCGAGTGACTGTCTGGTGATGAGATGATGGCACTCGACCTCGGGGTCGAGTGGTGGTTGAATTGGTGATGTCCTCTACTCGACCTGTTGGTCGAGTGGTCTCT	TACTCGACCTGTTGGTCGAGTGG 0.238752 1	repeat_sense,igr_sense, NM_122820.1,NM_126793.1,NM_103358.1,NM_180584.1,NM_116794.1,NM_113972.1,NM_201705.1,NM_148798.1,NM_148247.1,NM_103339.1,NM_103391.1,NM_148526.1,NM_147956.1,NM_114067.1,NM_126888.1,NM_201713.1,NM_148782.1,NM_179436.1,NM_116802.1,NM_126833.1,NM_147987.1,NM_103342.1,NM_105009.2,NM_202235.1,NM_126781.1,NM_113973.1,NM_179432.1,NM_180578.1,NM_126773.1,NM_147965.1, 512
152 24 NC_003074:12215748-12215875:1	ATGATGGCACTCGACCTCGGGGTCGAGTGGTGGTTGAATTGGTGATGTCCTCTACTCGACCTGTTGGTCGAGTGGTCTCTTGAGATCTTGAAGCTCCTACTCGACCTCTGGGTCGAGTGGTTTGTCAT	CTACTCGACCTCTGGGTCGAGTGGT 0.551704 1	repeat_sense,igr_sense, NM_122820.1,NM_126793.1,NM_103358.1,NM_180584.1,NM_116794.1,NM_113972.1,NM_148798.1,NM_148247.1,NM_111050.1,NM_122819.1,NM_103339.1,NM_122890.1,NM_103391.1,NM_148526.1,NM_147956.1,NM_114067.1,NM_126888.1,NM_201713.1,NM_148782.1,NM_180576.1,NM_179436.1,NM_116802.1,NM_126833.1,NM_147987.1,NM_103342.1,NM_147971.1,NM_202235.1,NM_126781.1,NM_122822.1,NM_122889.1,NM_103402.1,NM_…
153 24 NC_003074:12215748-12215875:1	ATGATGGCACTCGACCTCGGGGTCGAGTGGTGGTTGAATTGGTGATGTCCTCTACTCGACCTGTTGGTCGAGTGGTCTCTTGAGATCTTGAAGCTCCTACTCGACCTCTGGGTCGAGTGGTTTGTCAT	TCGACCTCTGGGTCGAGTGGT 0.267127 1	repeat_sense,igr_sense, NM_122820.1,NM_126793.1,NM_103358.1,NM_180584.1,NM_116794.1,NM_113972.1,NM_148798.1,NM_103339.1,NM_103391.1,NM_147956.1,NM_126888.1,NM_148782.1,NM_116802.1,NM_126833.1,NM_147987.1,NM_103342.1,NM_202235.1,NM_126781.1,NM_113973.1,NM_179432.1,NM_126773.1,NM_147965.1, 331
154 24 NC_003074:12227867-12228061:1	GGAGGTACTCGACCTCTAGGTAGAGTGAGGAGGTCGAGTGGTTGTCTGATGATGGAGGTGAAGACACTCGTCCTCATGGTCGAGTGAAGTGATCGAGTGACTGTCTGGTGATGAGATGATGGCACTCGACCTCGGGGTCGAGTGGTGGTTGAATTGGTGATGTCCTCTACTCGACCTGTTGGTCGAGTGGTCTCT	TACTCGACCTGTTGGTCGAGTGG 0.238752 1	repeat_sense,igr_sense, NM_122820.1,NM_126793.1,NM_103358.1,NM_180584.1,NM_116794.1,NM_113972.1,NM_201705.1,NM_148798.1,NM_148247.1,NM_103339.1,NM_103391.1,NM_148526.1,NM_147956.1,NM_114067.1,NM_126888.1,NM_201713.1,NM_148782.1,NM_179436.1,NM_116802.1,NM_126833.1,NM_147987.1,NM_103342.1,NM_105009.2,NM_202235.1,NM_126781.1,NM_113973.1,NM_179432.1,NM_180578.1,NM_126773.1,NM_147965.1, 512
155 24 NC_003074:12227982-12228109:1	ATGATGGCACTCGACCTCGGGGTCGAGTGGTGGTTGAATTGGTGATGTCCTCTACTCGACCTGTTGGTCGAGTGGTCTCTTGAGATCTTGAAGCTCCTACTCGACCTCTGGGTCGAGTGGTTTGTCAT	CTACTCGACCTCTGGGTCGAGTGGT 0.551704 1	repeat_sense,igr_sense, NM_122820.1,NM_126793.1,NM_103358.1,NM_180584.1,NM_116794.1,NM_113972.1,NM_148798.1,NM_148247.1,NM_111050.1,NM_122819.1,NM_103339.1,NM_122890.1,NM_103391.1,NM_148526.1,NM_147956.1,NM_114067.1,NM_126888.1,NM_201713.1,NM_148782.1,NM_180576.1,NM_179436.1,NM_116802.1,NM_126833.1,NM_147987.1,NM_103342.1,NM_147971.1,NM_202235.1,NM_126781.1,NM_122822.1,NM_122889.1,NM_103402.1,NM_…
156 24 NC_003074:12227982-12228109:1	ATGATGGCACTCGACCTCGGGGTCGAGTGGTGGTTGAATTGGTGATGTCCTCTACTCGACCTGTTGGTCGAGTGGTCTCTTGAGATCTTGAAGCTCCTACTCGACCTCTGGGTCGAGTGGTTTGTCAT	TCGACCTCTGGGTCGAGTGGT 0.267127 1	repeat_sense,igr_sense, NM_122820.1,NM_126793.1,NM_103358.1,NM_180584.1,NM_116794.1,NM_113972.1,NM_148798.1,NM_103339.1,NM_103391.1,NM_147956.1,NM_126888.1,NM_148782.1,NM_116802.1,NM_126833.1,NM_147987.1,NM_103342.1,NM_202235.1,NM_126781.1,NM_113973.1,NM_179432.1,NM_126773.1,NM_147965.1, 331
157 24 NC_003074:12247758-12247835:1	GAGGGCACTCGATCTCGTGGTCGAGTGGTGAAGTGAAGTGGTGATGTCCTCTGCTCGACCTGTGGGTCGAGTGGTCTC	CTGCTCGACCTGTGGGTCGAGTGGT 0.315614 1	repeat_sense,cds_antisense,exon_antisense, NM_126793.1,NM_103358.1,NM_180584.1,NM_116794.1,NM_113972.1,NM_201705.1,NM_148798.1,NM_148247.1,NM_103339.1,NM_103391.1,NM_148526.1,NM_147956.1,NM_126888.1,NM_201713.1,NM_148782.1,NM_179436.1,NM_116802.1,NM_126833.1,NM_147987.1,NM_103342.1,NM_202235.1,NM_126781.1,NM_113973.1,NM_179432.1,NM_126773.1,NM_147965.1, 655
158 24 NC_003074:12257437-12257514:1	GAGGGCACTCGACCTCGTGGTCGAGTGGTGAAGTGAAGTGGTGATGTCCTCTGCTCGACCTGTGGGTCGAGTGGTCTC	CTGCTCGACCTGTGGGTCGAGTGGT 0.359252 1	repeat_sense,cds_antisense,exon_antisense, NM_126793.1,NM_103358.1,NM_180584.1,NM_116794.1,NM_113972.1,NM_201705.1,NM_148798.1,NM_148247.1,NM_103339.1,NM_103391.1,NM_148526.1,NM_147956.1,NM_126888.1,NM_201713.1,NM_148782.1,NM_179436.1,NM_116802.1,NM_126833.1,NM_147987.1,NM_103342.1,NM_202235.1,NM_126781.1,NM_113973.1,NM_179432.1,NM_126773.1,NM_147965.1, 655
159 24 NC_003074:12316732-12316917:1	GTGAAGATACTCGACCTCGGGGTCGAGTGGAGTGATCGAGTGATGGTCAGGTGGTGGAGGTGAAGACACTCGACCAGGGGGTCGAGTGATATGATGAAATCGTGAAATTCCCTACTTGACATGGGGGTCGAGTGGTCTCTTGAGGTCTTGAAGCTTCTACTCTACCTCATGGTCGAGTGGTTTGAC	ACTCTACCTCATGGTCGAGTG 0.221562 1	repeat_sense,igr_sense, NM_122820.1,NM_103358.1,NM_180584.1,NM_116794.1,NM_113972.1,NM_148798.1,NM_148247.1,NM_122819.1,NM_103339.1,NM_103391.1,NM_147956.1,NM_114067.1,NM_126888.1,NM_148782.1,NM_116802.1,NM_147987.1,NM_114100.1,NM_103342.1,NM_202235.1,NM_126781.1,NM_123409.2,NM_101418.3,NM_113973.1,NM_179432.1,NM_180578.1,NM_126773.1,NM_147965.1, 170
160 132 NC_003074:12384864-12384954:1	CGGTACTCGACCCTGGTGGTCGAGTAATGGGTCGAGTGATGAGCCAAAGTCTTCTTCTCTTCCTGATGCTCGAATGTCTGGTTGAGTGCGG	ATGCTCGAATGTCTGGTTGAGTGC 0.193311 1	repeat_sense,igr_sense, NM_122905.1,NM_126793.1,NM_179005.1,NM_112247.2,NM_104751.3,NM_116794.1,NM_130028.3,NM_113972.1,NM_201705.1,NM_148798.1,NM_113526.1,NM_179006.1,NM_147956.1,NM_126888.1,NM_106235.2,NM_201713.1,NM_104752.1,NM_126833.1,NM_147987.1,NM_103342.1,NM_129052.2,NM_202235.1,NM_126781.1,NM_202327.1,NM_122828.1,NM_103813.2,NM_113973.1,NM_179432.1,NM_147289.1,NM_104756.2,NM_126773.1,NM_…
161 24 NC_003074:12385111-12385247:1	GGCGATGGTGTTGCTCGATCAGGGGCTCGAGTGAATGGCGAGGGATTGTGATGGATGTGCTCGACCAATTGGTCGAGTGGTGGTGAGAAACGGTGATGTCAGCTACTCGAGCTCGTGGTCGAGTGGTGGATAGAGTC	CTACTCGAGCTCGTGGTCGAGTGGT 0.7731 1	repeat_sense,igr_sense, NM_122820.1,NM_101667.1,NM_103358.1,NM_113671.2,NM_180584.1,NM_116794.1,NM_113972.1,NM_201705.1,NM_148798.1,NM_148247.1,NM_103339.1,NM_103391.1,NM_148526.1,NM_147956.1,NM_114067.1,NM_126888.1,NM_111001.1,NM_179436.1,NM_116802.1,NM_126833.1,NM_147987.1,NM_114100.1,NM_103342.1,NM_202235.1,NM_126781.1,NM_113973.1,NM_179432.1,NM_180578.1,NM_126773.1,NM_147965.1, 338
162 24 NC_003074:12385111-12385247:1	GGCGATGGTGTTGCTCGATCAGGGGCTCGAGTGAATGGCGAGGGATTGTGATGGATGTGCTCGACCAATTGGTCGAGTGGTGGTGAGAAACGGTGATGTCAGCTACTCGAGCTCGTGGTCGAGTGGTGGATAGAGTC	TCGAGCTCGTGGTCGAGTGGTG 0.722841 1	repeat_sense,igr_sense, NM_103358.1,NM_180584.1,NM_116794.1,NM_113972.1,NM_201705.1,NM_148798.1,NM_148247.1,NM_103339.1,NM_103391.1,NM_147956.1,NM_126888.1,NM_111001.1,NM_116802.1,NM_126833.1,NM_147987.1,NM_103342.1,NM_202235.1,NM_126781.1,NM_113973.1,NM_179432.1,NM_126773.1,NM_147965.1, 179
163 24 NC_003074:12403950-12404070:1	GACCACTCGACCCCCTGGTCGAGTAGAAGACTTCACTACTTCACTTCACCACTCGACCGCCTGGCCGAGTACCACCATGAGAGTCACTCGATCACTTCACTCGACCACCTGGTCGAGTATC	CACTCGACCACCTGGTCGAGT 0.547699 1	repeat_sense,igr_sense, NM_122820.1,NM_126793.1,NM_103358.1,NM_180584.1,NM_116794.1,NM_113972.1,NM_201705.1,NM_148798.1,NM_148247.1,NM_122819.1,NM_103339.1,NM_122890.1,NM_103391.1,NM_148526.1,NM_147956.1,NM_114067.1,NM_126888.1,NM_201713.1,NM_117794.1,NM_148782.1,NM_180576.1,NM_179436.1,NM_116802.1,NM_126833.1,NM_147987.1,NM_114100.1,NM_103342.1,NM_147971.1,NM_202235.1,NM_126781.1,NM_122822.1,NM_…
164 132 NC_003074:12584694-12584784:1	CTGTACTCGACCCATGTGGTCGAGTGGGAGGTCGAGTGAATAGCTGGAGTCTTCTTTTCTTCCTTGTGCTCGAGTGTATGGTTGAGTGCGG	TGCTCGAGTGTATGGTTGAGTGC 0.356436 1	repeat_sense,igr_sense, NM_126793.1,NM_116794.1,NM_113972.1,NM_201705.1,NM_148798.1,NM_147956.1,NM_126888.1,NM_201713.1,NM_126833.1,NM_147987.1,NM_103342.1,NM_124550.1,NM_202235.1,NM_126781.1,NM_122828.1,NM_113973.1,NM_179432.1,NM_126773.1,NM_147965.1, 209
165 8 NC_003074:12584723-12584816:1	GGTCGAGTGAATAGCTGGAGTCTTCTTTTCTTCCTTGTGCTCGAGTGTATGGTTGAGTGCGGAATGAAGAAGGCTCTGAAGCTTTTCATCGAGT	GAAGAAGGCTCTGAAGCTTTTC 0.0844112 1	repeat_sense,igr_sense, NM_106190.1,NM_180794.1,NM_124738.2,NM_100861.3,NM_113122.1,NM_104892.2,NM_118311.2,NM_104199.3,NM_116794.1,NM_129638.2,NM_113972.1,NM_180292.2,NM_148798.1,NM_179954.2,NM_113020.2,NM_120775.2,NM_114563.1,NM_123893.1,NM_126495.2,NM_147956.1,NM_126888.1,NM_147987.1,NM_111173.2,NM_103342.1,NM_103064.2,NM_202235.1,NM_179950.1,NM_126781.1,NM_122828.1,NM_115253.2,NM_113973.1,NM_…
166 207 NC_003074:12787917-12788014:1	TAGGGAATATCTTGATCTTTCCACCATCTACAAAGAATAAAAAAAAAGCTTCCAATATTACTAGGTATTTGGTGGTGGAAAGATCAAGATATTCCTTA	GGTGGTGGAAAGATCAAGAT 1.35233 0	igr_sense, NM_118212.2,NM_128139.2,NM_106680.3,NM_111702.2,NM_105809.3,NM_100068.1,NM_106079.1,NM_202528.1,NM_120262.2,NM_124003.2, 8
167 2 NC_003074:13216939-13217050:1	TCCATCGCAAACATTGCGAGGGATTTGCTACTACGAACGCTGGAACTTGCAACTCCCTCGCAGGTTTGCTACAGAAATATTCATTGCAAATCCCTCGCAAATTTTGCGAGGA	ATCCCTCGCAAATTTTGCGA 0.672145 1	repeat_sense,igr_sense, NM_104162.1,NM_147313.1,NM_124125.2,NM_113908.1,NM_122762.1, 146
168 24 NC_003074:13383817-13384002:1	GTGAAGACACTCGACCTCGGGGTCGAGTGATGTGATCGAGTGAAGGTCAGGTGGTGGAGGTGGAGACACTCGACCTCGGGGTCGAGTGATGAGGTGAAGTGGTGATGTCCTCTACTCGACCAGGGGGTCGAGTGGTCTGCTGAGGTTGTGAAGCGTCTACTCGACCTGGGGGTCGAGTGGTTTGGC	TACTCGACCTGGGGGTCGAGTGGT 0.103505 1	repeat_sense,igr_sense, NM_126793.1,NM_122830.1,NM_103358.1,NM_180584.1,NM_116794.1,NM_113972.1,NM_201705.1,NM_148798.1,NM_148247.1,NM_122819.1,NM_103339.1,NM_103391.1,NM_148526.1,NM_147956.1,NM_126888.1,NM_201713.1,NM_148782.1,NM_179436.1,NM_116802.1,NM_126833.1,NM_147987.1,NM_103342.1,NM_202235.1,NM_126781.1,NM_122822.1,NM_113973.1,NM_179432.1,NM_122821.1,NM_120741.2,NM_126773.1,NM_147965.1, 11…
169 24 NC_003074:13616094-13616173:1	GTCCTCTACTCGACCAGGGGGTCGAGTGGTCTGTTGAGGTCGTGAAGCATCTACTCGACCTGGGGGTCGAGTGGTTTGAC	TCTACTCGACCTGGGGGTCGAGTGGT 0.812435 1	repeat_sense,igr_sense, NM_126793.1,NM_122830.1,NM_103358.1,NM_180584.1,NM_116794.1,NM_113972.1,NM_201705.1,NM_148798.1,NM_148247.1,NM_122819.1,NM_103339.1,NM_103391.1,NM_148526.1,NM_147956.1,NM_126888.1,NM_201713.1,NM_148782.1,NM_179436.1,NM_116802.1,NM_126833.1,NM_147987.1,NM_103342.1,NM_202235.1,NM_126781.1,NM_122822.1,NM_113973.1,NM_179432.1,NM_122821.1,NM_120741.2,NM_126773.1,NM_147965.1, 11…
170 24 NC_003074:13616047-13616173:1	GTTATGAGACTCGACCAGGGGGTCGAGTGGTGAGGTGAAGTGGTGAAGTCCTCTACTCGACCAGGGGGTCGAGTGGTCTGTTGAGGTCGTGAAGCATCTACTCGACCTGGGGGTCGAGTGGTTTGAC	CTCGACCTGGGGGTCGAGTG 0.361072 1	repeat_sense,igr_sense, NM_126793.1,NM_103358.1,NM_180584.1,NM_116794.1,NM_113972.1,NM_201705.1,NM_148798.1,NM_148247.1,NM_103339.1,NM_103391.1,NM_148526.1,NM_147956.1,NM_126888.1,NM_201713.1,NM_148782.1,NM_179436.1,NM_116802.1,NM_126833.1,NM_147987.1,NM_103342.1,NM_202235.1,NM_126781.1,NM_122822.1,NM_113973.1,NM_179432.1,NM_122821.1,NM_126773.1,NM_147965.1, 957
171 132 NC_003074:13623950-13624040:1	CTGTACTCGACCCTGATGGTCGAGTGAGAGGTCGAGTGATATGCTGGAGTCTTCTATTCTTCCTTGTGCTCGAGTGTCTAGTTGAGTGCAG	TGCTCGAGTGTCTAGTTGAGTGC 0.244697 1	exon_sense,repeat_sense,cds_sense, NM_126793.1,NM_116794.1,NM_113972.1,NM_201705.1,NM_148798.1,NM_147956.1,NM_126888.1,NM_201713.1,NM_126833.1,NM_147987.1,NM_103342.1,NM_202235.1,NM_126781.1,NM_122828.1,NM_113973.1,NM_179432.1,NM_126773.1,NM_147965.1, 216
172 24 NC_003074:13625937-13626043:1	GTGATGATACTCGACCAGGGGGTCGAGTAACTTGGTAGAGTGAATGGCTGAGTGTGGTCAGGTTGTGTGGCGAAGTGATATTCGACCAGGGGGTCGAGTGGCGTCAT	TATTCGACCAGGGGGTCGAGTGG 1.01732 0	repeat_sense,igr_sense, NM_126793.1,NM_103358.1,NM_122817.1,NM_180584.1,NM_116794.1,NM_113972.1,NM_201705.1,NM_148798.1,NM_148247.1,NM_103339.1,NM_103391.1,NM_148526.1,NM_147956.1,NM_126888.1,NM_201713.1,NM_148782.1,NM_179436.1,NM_122815.1,NM_116802.1,NM_126833.1,NM_147987.1,NM_103342.1,NM_202235.1,NM_126781.1,NM_122822.1,NM_113973.1,NM_179432.1,NM_122821.1,NM_126773.1,NM_147965.1, 774
173 24 NC_003074:13633516-13633622:1	GTGATGATACTCGACCAGGGGGTCGAGTAACTTGGTAGAGTGAATGGCCGAGTGTGGTCAGGTGGTGTGGCGAAGTGATACTCGACCAGGGGGTTGAGTGGCATCAT	TGATACTCGACCAGGGGGTTGAGTGG 0.789059 0	repeat_sense,igr_sense, NM_202974.1,NM_126793.1,NM_103358.1,NM_180584.1,NM_116794.1,NM_113972.1,NM_201705.1,NM_148798.1,NM_148247.1,NM_103339.1,NM_103391.1,NM_148526.1,NM_119977.3,NM_147956.1,NM_201713.1,NM_148782.1,NM_179436.1,NM_116802.1,NM_126833.1,NM_147987.1,NM_103342.1,NM_202235.1,NM_126781.1,NM_122822.1,NM_113973.1,NM_179432.1,NM_122821.1,NM_126773.1,NM_147965.1, 641
174 24 NC_003074:13633516-13633622:1	GTGATGATACTCGACCAGGGGGTCGAGTAACTTGGTAGAGTGAATGGCCGAGTGTGGTCAGGTGGTGTGGCGAAGTGATACTCGACCAGGGGGTTGAGTGGCATCAT	ACTCGACCAGGGGGTTGAGTGG 0.61055 0	repeat_sense,igr_sense, NM_202974.1,NM_126793.1,NM_103358.1,NM_180584.1,NM_116794.1,NM_113972.1,NM_201705.1,NM_148798.1,NM_148247.1,NM_103339.1,NM_103391.1,NM_148526.1,NM_119977.3,NM_147956.1,NM_201713.1,NM_148782.1,NM_179436.1,NM_116802.1,NM_126833.1,NM_147987.1,NM_103342.1,NM_202235.1,NM_126781.1,NM_122822.1,NM_113973.1,NM_179432.1,NM_122821.1,NM_126773.1,NM_147965.1, 617
175 24 NC_003074:13662824-13662898:1	AGACACTCGACCTCGTGGTCGAGTGATGTGGTGAAGTAGTGATGTCCTCTACTCGACCAGGGGGTCGAGTGATCT	CTACTCGACCAGGGGGTCGAGTGAT 0.759327 0	repeat_sense,igr_sense, NM_126793.1,NM_103358.1,NM_147281.1,NM_122817.1,NM_180584.1,NM_116794.1,NM_113972.1,NM_201705.1,NM_148798.1,NM_148247.1,NM_103339.1,NM_122890.1,NM_119847.2,NM_103391.1,NM_148526.1,NM_147956.1,NM_126888.1,NM_201713.1,NM_148782.1,NM_180576.1,NM_179436.1,NM_122815.1,NM_116802.1,NM_126833.1,NM_147987.1,NM_103342.1,NM_147971.1,NM_202235.1,NM_126781.1,NM_122822.1,NM_122889.1,NM_…
176 24 NC_003074:13662824-13662898:1	AGACACTCGACCTCGTGGTCGAGTGATGTGGTGAAGTAGTGATGTCCTCTACTCGACCAGGGGGTCGAGTGATCT	TCGACCAGGGGGTCGAGTGAT 0.369798 0	repeat_sense,igr_sense, NM_126793.1,NM_103358.1,NM_147281.1,NM_180584.1,NM_116794.1,NM_113972.1,NM_201705.1,NM_148798.1,NM_148247.1,NM_103339.1,NM_103391.1,NM_148526.1,NM_147956.1,NM_201713.1,NM_148782.1,NM_179436.1,NM_116802.1,NM_126833.1,NM_147987.1,NM_103342.1,NM_202235.1,NM_126781.1,NM_122822.1,NM_113973.1,NM_179432.1,NM_122821.1,NM_126773.1,NM_147965.1, 770
177 24 NC_003074:13742032-13742194:1	GAAGACATACTCGACCACCAGGTCGTGTGCATCCAGCACCATACTCGACCCCCTGGTCGAGTGACTTTGGAGCCATTCTTCCCATCTACTCGACCCCCTAGTCGAGTATCCTCAGCTCAGGCTACTCGATGACGCCATCGACCCCCTGGTCGAGTATCACTTC	TCGACCCCCTGGTCGAGTAT 0.129008 1	repeat_sense,igr_sense, NM_122820.1,NM_122890.1,NM_114067.1,NM_180576.1,NM_114100.1,NM_147971.1,NM_122822.1,NM_122889.1,NM_103402.1,NM_147959.1,NM_122821.1,NM_180578.1, 551
178 24 NC_003074:14006081-14006204:1	GTGATATTCGACCAGCGGGTCGAGTGGCGTCATCGAGTGGCCTGAGCTGAGGTTACTCGACCTGGGGGTCCAGTAGATGGGAAGAATGGCTCCAAAGTCACTCGACCAGGGGGTCGAGTATGAT	ACTCGACCAGGGGGTCGAGTATG 0.366388 0	repeat_sense,igr_sense, NM_126793.1,NM_103358.1,NM_122817.1,NM_180584.1,NM_116794.1,NM_113972.1,NM_201705.1,NM_148798.1,NM_148247.1,NM_103339.1,NM_122890.1,NM_103391.1,NM_119847.2,NM_148526.1,NM_147956.1,NM_126888.1,NM_201713.1,NM_148782.1,NM_180576.1,NM_179436.1,NM_122815.1,NM_116802.1,NM_126833.1,NM_147987.1,NM_103342.1,NM_147971.1,NM_202235.1,NM_126781.1,NM_122822.1,NM_122889.1,NM_113973.1,NM_…
179 24 NC_003074:14110945-14111051:1	GTGATGATACTCGACCAGGGGGTCGAGTAATTTGGTAGAGTGAATGGCCGAGTGTGGTCAGGTGGTGTGGCGAAGTGATACTCGACCAGGGGGTCGAGTGGCATCAT	TGATACTCGACCAGGGGGTCGAGTGG 0.65376 0	repeat_sense,igr_sense, NM_126793.1,NM_103358.1,NM_122817.1,NM_180584.1,NM_116794.1,NM_113972.1,NM_201705.1,NM_148798.1,NM_148247.1,NM_103339.1,NM_122890.1,NM_119847.2,NM_103391.1,NM_148526.1,NM_147956.1,NM_126888.1,NM_201713.1,NM_148782.1,NM_180576.1,NM_179436.1,NM_122815.1,NM_116802.1,NM_126833.1,NM_147987.1,NM_103342.1,NM_147971.1,NM_202235.1,NM_126781.1,NM_122822.1,NM_122889.1,NM_113973.1,NM_…
180 24 NC_003074:14110945-14111051:1	GTGATGATACTCGACCAGGGGGTCGAGTAATTTGGTAGAGTGAATGGCCGAGTGTGGTCAGGTGGTGTGGCGAAGTGATACTCGACCAGGGGGTCGAGTGGCATCAT	ACTCGACCAGGGGGTCGAGTGG 0.552612 0	repeat_sense,igr_sense, NM_126793.1,NM_103358.1,NM_122817.1,NM_180584.1,NM_116794.1,NM_113972.1,NM_201705.1,NM_148798.1,NM_148247.1,NM_103339.1,NM_122890.1,NM_119847.2,NM_103391.1,NM_148526.1,NM_147956.1,NM_126888.1,NM_201713.1,NM_148782.1,NM_180576.1,NM_179436.1,NM_122815.1,NM_116802.1,NM_126833.1,NM_147987.1,NM_103342.1,NM_147971.1,NM_202235.1,NM_126781.1,NM_122822.1,NM_122889.1,NM_113973.1,NM_…
181 24 NC_003074:14420968-14421073:1	GATGACGCCACTCGACCCCCTGGTCGAGTATCACTTCGCCACACCACCTGACCACACTCGACAATTCACTCTACCAAGTTACTCGACCCCCTGGTCGAGTATCATC	TACTCGACCCCCTGGTCGAGTA 0.293128 0	repeat_sense,igr_sense, NM_122820.1,NM_103358.1,NM_180584.1,NM_116794.1,NM_113972.1,NM_201705.1,NM_148798.1,NM_122819.1,NM_103339.1,NM_122890.1,NM_103391.1,NM_114067.1,NM_126888.1,NM_148782.1,NM_180576.1,NM_116802.1,NM_126833.1,NM_147987.1,NM_114100.1,NM_103342.1,NM_147971.1,NM_202235.1,NM_126781.1,NM_122822.1,NM_122889.1,NM_103402.1,NM_113973.1,NM_179432.1,NM_147959.1,NM_122821.1,NM_180578.1,NM_…
182 24 NC_003074:14432491-14432628:1	GAAGACACTCGACCTCGGGGTCGAGTGAAGTGAACGAGTGATTGTTAGGTGGTAGAGGTGAAGACACTCGACCAGGGGGACGAGTGATGAGATGAAATCGAGAAGTCCCCTACTCGACCTGGGGGTCGAGTGGTCTTT	TACTCGACCTGGGGGTCGAGTGGT 0.867055 1	repeat_sense,igr_sense, NM_126793.1,NM_122830.1,NM_103358.1,NM_180584.1,NM_116794.1,NM_113972.1,NM_201705.1,NM_148798.1,NM_148247.1,NM_122819.1,NM_103339.1,NM_103391.1,NM_148526.1,NM_147956.1,NM_126888.1,NM_201713.1,NM_148782.1,NM_179436.1,NM_116802.1,NM_126833.1,NM_147987.1,NM_103342.1,NM_202235.1,NM_126781.1,NM_122822.1,NM_113973.1,NM_179432.1,NM_122821.1,NM_120741.2,NM_126773.1,NM_147965.1, 11…
183 24 NC_003074:14432437-14432667:1	TACTCGACTTCCAGGTAGAGTGGTGTGATCGAGTGATGATCAGGTAATGGAGGTGAAGACACTCGACCTCGGGGTCGAGTGAAGTGAACGAGTGATTGTTAGGTGGTAGAGGTGAAGACACTCGACCAGGGGGACGAGTGATGAGATGAAATCGAGAAGTCCCCTACTCGACCTGGGGGTCGAGTGGTCTTTGAAGGTCTTGAAGCTTCTACTCGACCTTGGGGTCGAGTG	TACTCGACCTTGGGGTCGAGTGGT 0.264427 1	repeat_sense,igr_sense, NM_122905.1,NM_126793.1,NM_103358.1,NM_180584.1,NM_116794.1,NM_113972.1,NM_201705.1,NM_148798.1,NM_148247.1,NM_122819.1,NM_103339.1,NM_103391.1,NM_148526.1,NM_147956.1,NM_126888.1,NM_201713.1,NM_148782.1,NM_201718.1,NM_179436.1,NM_116802.1,NM_126833.1,NM_147987.1,NM_103342.1,NM_202235.1,NM_126781.1,NM_122822.1,NM_113973.1,NM_179432.1,NM_122821.1,NM_126773.1,NM_147965.1, 10…
184 24 NC_003074:14432489-14432674:1	GTGAAGACACTCGACCTCGGGGTCGAGTGAAGTGAACGAGTGATTGTTAGGTGGTAGAGGTGAAGACACTCGACCAGGGGGACGAGTGATGAGATGAAATCGAGAAGTCCCCTACTCGACCTGGGGGTCGAGTGGTCTTTGAAGGTCTTGAAGCTTCTACTCGACCTTGGGGTCGAGTGGTTTGAC	CGACCTTGGGGTCGAGTGGT 0.233477 1	repeat_sense,igr_sense, NM_126793.1,NM_103358.1,NM_180584.1,NM_116794.1,NM_113972.1,NM_201705.1,NM_148798.1,NM_148247.1,NM_103339.1,NM_103391.1,NM_148526.1,NM_147956.1,NM_126888.1,NM_179436.1,NM_116802.1,NM_126833.1,NM_147987.1,NM_103342.1,NM_202235.1,NM_126781.1,NM_113973.1,NM_179432.1,NM_126773.1,NM_147965.1, 455
185 38 NC_003074:14452939-14453049:1	GGGCTTGGTGTCGACCGACACATCAGAGGTGTAGATCGACACCTTCGGGATTAGAATGAAGACACGATTGGTGTCGAACGACACAACAGAGGTGTCGATCGACACCAACCT	AGAGGTGTCGATCGACACCAAC 0.869805 1	repeat_sense,igr_sense, NM_114016.1,NM_126896.1,NM_126950.1,NM_147252.1,NM_148529.1,NM_114074.1,NM_114079.1,NM_201961.1,NM_114102.1,NM_148522.1,NM_122848.1,NM_126918.1, 656
186 24 NC_003074:14590258-14590400:1	ATGAAGGTACTCGACCATGTGGTCGAGTAGTGTGATCGAGTGAAGGTGATTTGGTGGACGTGATGATACTTGACCAGGGGGTCGAGTGATGTGATCGAGTGATTGTCTTGGCGGTACTCGACCAGTGGGTCGAGTGGTGTTGT	GCGGTACTCGACCAGTGGGTCGAGT 0.896798 1	repeat_sense,igr_sense, NM_122820.1,NM_126793.1,NM_103358.1,NM_180584.1,NM_116794.1,NM_113972.1,NM_201705.1,NM_148798.1,NM_148247.1,NM_103339.1,NM_122890.1,NM_119847.2,NM_103391.1,NM_148526.1,NM_147956.1,NM_126888.1,NM_201713.1,NM_148782.1,NM_180576.1,NM_179436.1,NM_116802.1,NM_102902.1,NM_126833.1,NM_147987.1,NM_103342.1,NM_147971.1,NM_202235.1,NM_126781.1,NM_122822.1,NM_122889.1,NM_103402.1,NM_…
187 24 NC_003074:14590140-14590392:1	GCTTGAGTGTCTGGTTGAGTGCGAAATGGAGATGATGCTGAAGCTAGCATCCGAGTATGTAGTCGAGTGATAGAGATGGTGGTACTCGGCTTGGTGGTAGAGTGATCGAGTGAAGGTGATGAAGGTACTCGACCATGTGGTCGAGTAGTGTGATCGAGTGAAGGTGATTTGGTGGACGTGATGATACTTGACCAGGGGGTCGAGTGATGTGATCGAGTGATTGTCTTGGCGGTACTCGACCAGTGGGTCGAGT	TACTCGACCAGTGGGTCGAGTGGT 0.920422 1	repeat_sense,igr_sense, NM_122820.1,NM_124806.1,NM_126793.1,NM_103358.1,NM_180584.1,NM_116794.1,NM_113972.1,NM_201705.1,NM_148798.1,NM_148247.1,NM_103339.1,NM_122890.1,NM_119847.2,NM_103391.1,NM_148526.1,NM_147956.1,NM_126888.1,NM_201713.1,NM_148782.1,NM_180576.1,NM_179436.1,NM_116802.1,NM_126833.1,NM_147987.1,NM_103342.1,NM_147971.1,NM_202235.1,NM_126781.1,NM_122822.1,NM_122889.1,NM_103402.1,NM_…
188 24 NC_003074:14590261-14590443:1	AAGGTACTCGACCATGTGGTCGAGTAGTGTGATCGAGTGAAGGTGATTTGGTGGACGTGATGATACTTGACCAGGGGGTCGAGTGATGTGATCGAGTGATTGTCTTGGCGGTACTCGACCAGTGGGTCGAGTGGTGTTGTGAAGTGATGAGGCCATCTACTCGACCAGGGGGTCGAGTAGTTT	CTACTCGACCAGGGGGTCGAGTAGT 0.669098 1	repeat_sense,igr_sense, NM_122905.1,NM_126793.1,NM_103358.1,NM_122817.1,NM_180584.1,NM_116794.1,NM_113972.1,NM_201705.1,NM_148798.1,NM_148247.1,NM_103339.1,NM_122890.1,NM_119847.2,NM_103391.1,NM_148526.1,NM_147956.1,NM_126888.1,NM_201713.1,NM_148782.1,NM_180576.1,NM_179436.1,NM_122815.1,NM_116802.1,NM_126833.1,NM_147987.1,NM_103342.1,NM_147971.1,NM_202235.1,NM_126781.1,NM_122822.1,NM_122889.1,NM_…
189 24 NC_003074:14594636-14594778:1	ATGAAGGTACTCGACCATGTGGTTGAGTAGTGTGATCGAGTGAAGGTGATTTGGTGGACGTGATGATACTCGACCAGGAGGTCGAGTGATGTGATCAAATGATTGTCTTGGCGGTACTCGACCAGGGGGTCGAGTGGTGTTGT	GCGGTACTCGACCAGGGGGTCGAGT 0.786134 1	repeat_sense,igr_sense, NM_126793.1,NM_103358.1,NM_123660.2,NM_122817.1,NM_180584.1,NM_116794.1,NM_113972.1,NM_201705.1,NM_148798.1,NM_148247.1,NM_103339.1,NM_122890.1,NM_119847.2,NM_103391.1,NM_148526.1,NM_147956.1,NM_126888.1,NM_201713.1,NM_148782.1,NM_180576.1,NM_123420.1,NM_179436.1,NM_122815.1,NM_116802.1,NM_126833.1,NM_147987.1,NM_103342.1,NM_147971.1,NM_202235.1,NM_126781.1,NM_122822.1,NM_…
190 24 NC_003074:14594636-14594778:1	ATGAAGGTACTCGACCATGTGGTTGAGTAGTGTGATCGAGTGAAGGTGATTTGGTGGACGTGATGATACTCGACCAGGAGGTCGAGTGATGTGATCAAATGATTGTCTTGGCGGTACTCGACCAGGGGGTCGAGTGGTGTTGT	TACTCGACCAGGGGGTCGAGTGG 0.945805 1	repeat_sense,igr_sense, NM_126793.1,NM_103358.1,NM_122817.1,NM_180584.1,NM_116794.1,NM_113972.1,NM_201705.1,NM_148798.1,NM_148247.1,NM_103339.1,NM_122890.1,NM_119847.2,NM_103391.1,NM_148526.1,NM_147956.1,NM_126888.1,NM_201713.1,NM_148782.1,NM_180576.1,NM_179436.1,NM_122815.1,NM_116802.1,NM_126833.1,NM_147987.1,NM_103342.1,NM_147971.1,NM_202235.1,NM_126781.1,NM_122822.1,NM_122889.1,NM_113973.1,NM_…
191 24 NC_003074:14805141-14805222:1	GGATCACCACTCGACCCCCTGGTCGAGTAGATGGCATCACCTCTTCTCACCACCACTCGACCCCCTGGTCGAGTAGACGACC	CCACTCGACCCCCTGGTCGAGTA 0.368308 0	repeat_sense,igr_sense, NM_122820.1,NM_103358.1,NM_180584.1,NM_116794.1,NM_113972.1,NM_201705.1,NM_148798.1,NM_122819.1,NM_103339.1,NM_122890.1,NM_103391.1,NM_114067.1,NM_126888.1,NM_148782.1,NM_180576.1,NM_116802.1,NM_126833.1,NM_147987.1,NM_114100.1,NM_103342.1,NM_147971.1,NM_148010.1,NM_202235.1,NM_126781.1,NM_122822.1,NM_122889.1,NM_103402.1,NM_113973.1,NM_179432.1,NM_147959.1,NM_122821.1,NM_…
192 208 NC_003074:15315647-15315810:1	CAAGATTTGATTGGTGGGGCCGAGTAAATTTGAATTCAAATTCGAATTTGAATTGTGTTGACCTCGCACGTGTGAACTCGGCCGACATACTCGACGCGCGTGTCGAGTACAGTTTTGGGCCTGATGGGCTCTTTTTCTTACTCGGCTTCAGCTCTTCCATCTTG	TCGGCTTCAGCTCTTCCATC 0.461807 1	repeat_sense,igr_sense, NM_125179.2,NM_121373.2,NM_106177.3,NM_180878.1,NM_101417.2,NM_116621.1,NM_119297.2,NM_101524.2,NM_118015.1,NM_180751.1,NM_179460.1,NM_180752.1,NM_124769.3,NM_122576.2,NM_180855.1,NM_103631.1, 3
193 24 NC_003074:15723834-15723920:1	AGGCACTCGACCTCGAGGTCGAGTGAAGTGATCGAGTGACCGTCTGGTGATGGAGATGATGGCACTCGACCACGGGGTCGAGTGGTT	GGCACTCGACCACGGGGTCGAGTG 0.344913 0	repeat_sense,igr_sense, NM_122820.1,NM_126793.1,NM_103358.1,NM_180584.1,NM_116794.1,NM_113972.1,NM_201705.1,NM_148798.1,NM_148247.1,NM_122819.1,NM_103339.1,NM_122890.1,NM_103391.1,NM_148526.1,NM_147956.1,NM_114067.1,NM_126888.1,NM_201713.1,NM_148782.1,NM_180576.1,NM_179436.1,NM_116802.1,NM_126833.1,NM_147987.1,NM_103342.1,NM_147971.1,NM_202235.1,NM_126781.1,NM_122822.1,NM_122889.1,NM_103402.1,NM_…
194 24 NC_003074:15723834-15723920:1	AGGCACTCGACCTCGAGGTCGAGTGAAGTGATCGAGTGACCGTCTGGTGATGGAGATGATGGCACTCGACCACGGGGTCGAGTGGTT	CTCGACCACGGGGTCGAGTG 0.14445 0	repeat_sense,igr_sense, NM_122820.1,NM_126793.1,NM_103358.1,NM_180584.1,NM_116794.1,NM_113972.1,NM_201705.1,NM_148798.1,NM_148247.1,NM_122819.1,NM_103339.1,NM_122890.1,NM_103391.1,NM_148526.1,NM_147956.1,NM_114067.1,NM_126888.1,NM_201713.1,NM_148782.1,NM_180576.1,NM_179436.1,NM_116802.1,NM_126833.1,NM_147987.1,NM_103342.1,NM_147971.1,NM_202235.1,NM_126781.1,NM_122822.1,NM_122889.1,NM_103402.1,NM_…
195 24 NC_003074:15733298-15733384:1	AGGCACTCGACCTCGAGGTCGAGTGAAGTGATCGAGTGACCGTCTGGTGATGGAGATGATGGCACTCGACCACGGGGTCGAGTGGTT	GGCACTCGACCACGGGGTCGAGTG 0.45546 0	repeat_sense,igr_sense, NM_122820.1,NM_126793.1,NM_103358.1,NM_180584.1,NM_116794.1,NM_113972.1,NM_201705.1,NM_148798.1,NM_148247.1,NM_122819.1,NM_103339.1,NM_122890.1,NM_103391.1,NM_148526.1,NM_147956.1,NM_114067.1,NM_126888.1,NM_201713.1,NM_148782.1,NM_180576.1,NM_179436.1,NM_116802.1,NM_126833.1,NM_147987.1,NM_103342.1,NM_147971.1,NM_202235.1,NM_126781.1,NM_122822.1,NM_122889.1,NM_103402.1,NM_…
196 24 NC_003074:15733298-15733384:1	AGGCACTCGACCTCGAGGTCGAGTGAAGTGATCGAGTGACCGTCTGGTGATGGAGATGATGGCACTCGACCACGGGGTCGAGTGGTT	CTCGACCACGGGGTCGAGTG 0.231179 0	repeat_sense,igr_sense, NM_122820.1,NM_126793.1,NM_103358.1,NM_180584.1,NM_116794.1,NM_113972.1,NM_201705.1,NM_148798.1,NM_148247.1,NM_122819.1,NM_103339.1,NM_122890.1,NM_103391.1,NM_148526.1,NM_147956.1,NM_114067.1,NM_126888.1,NM_201713.1,NM_148782.1,NM_180576.1,NM_179436.1,NM_116802.1,NM_126833.1,NM_147987.1,NM_103342.1,NM_147971.1,NM_202235.1,NM_126781.1,NM_122822.1,NM_122889.1,NM_103402.1,NM_…
197 209 NC_003074:16173659-16173830:1	GAGTGTTGGATCGATCGATCCCGAGCTGGCGGACATTTTACTTCGGTGGATGAGTGGTGGATAGATCGATCTCCACCTAGGATCGATTGATCCCGAGCTGGCGGATGATTTGTCTTCGACGATGAGTTTTGGATCGATCGATCTAGTGGTGGGATCGATCGATCCAATGTTT	AGTGGTGGGATCGATCGATCC 0.275656 1	repeat_sense,igr_sense, NM_113998.2, 48
198 210 NC_003074:16818616-16818783:1	GATGGCTTTTGACGGTGGTGACATAATGGTGGAGAATGATTTGATACAGAGTGTTGGTGTTTCGCCGCGTCGGATTGACCTGAAATTCGCCGTCGATGAGAATTTTAGAGCTCGGCCGACGACTGACTCCATCAACGCCGCCATATCTCTCCGCCGTCAAACTCTCTC	GCCGCCATATCTCTCCGCCGTC 0.134976 1	cds_antisense,exon_antisense, NM_128889.2,NM_103010.1,NM_179162.2,NM_180657.1,NM_202659.1,NM_115857.1,NM_180658.1,NM_114446.2,NM_119585.1,NM_101662.2,NM_127387.1,NM_102483.1,NM_119492.2,NM_126460.3,NM_180656.1,NM_101663.1, 5
199 211 NC_003074:17332497-17332572:1	ATCCATGGCACTGACGCCGTTCACGGCAACTGCCGTAGACGTTGTTGTTGCCGTGAACGGCGTGAGTGCCGTAGAT	GTTGTTGCCGTGAACGGCGTGAG 0.447601 1	igr_sense, NM_106068.2,NM_114572.2,NM_115989.3,NM_101715.3,NM_128137.2,NM_201828.1,NM_114571.1,NM_114568.3,NM_128464.2,NM_179769.1,NM_114567.2,NM_115431.2,NM_112232.2,NM_118643.3, 8
200 212 NC_003074:17332489-17332580:1	AGATCATCATCCATGGCACTGACGCCGTTCACGGCAACTGCCGTAGACGTTGTTGTTGCCGTGAACGGCGTGAGTGCCGTAGATTATTGGCT	AACGGCGTGAGTGCCGTAGA 0.698894 1	igr_sense, NM_113499.1,NM_114568.3, 3
201 213 NC_003074:17753137-17753233:1	GTCGAGCTTCATTGGAACCAAATGGTGGCTCATCCATCTATTACTAAAGCTATACAGCAGGTGGACAAGCCATCATCATGTTCCTGTGAAGCTCGAT	AGCCATCATCATGTTCCTGT 0.31018 1	igr_sense, NM_106011.2,NM_179269.1,NM_101725.1,NM_116235.1,NM_118336.2,NM_122432.1,NM_111199.1,NM_130015.2,NM_100503.2,NM_112725.1,NM_104626.1,NM_123997.2, 6
202 6 NC_003074:18058676-18058786:1	AAATTTAAACCCTAAATCCCCAAATCGATTTATTATCTGCGATTTTGAGGTCAAGGTGGGTCTGTGATTTTGAGATAATGAAATCGATTTGGGGATTTAGGGTTTAAATTT	AAATCGATTTGGGGATTTAGG 0.0937857 1	repeat_sense,intron_sense, NM_202367.1,NM_122292.2,NM_124328.1,NM_105341.3,NM_100447.2,NM_120980.1,NM_125438.2,NM_122494.2, 47
203 214 NC_003074:18126593-18126759:1	TTTCTGCAGAGGCTGAGCCAGCGAGGTAAATCAAGGTCTTGTATTTAGCTGCGTATTCTGGTCCAACAATGTCTGAGTAGTATTTCTTGGCGTACTCATAGAGACCGTATTTAAAAGCTCCTTGGGCACTGTAACCAAGAAGCGTTGGTGACCAGCCTCTGGTGAAA	GCGTTGGTGACCAGCCTCTG 0.521382 0	cds_antisense,exon_antisense, NM_114744.2,NM_102424.1, 2
204 70 NC_003074:18938776-18938931:1	CCGCTACCGCCCGCAACCGCAAACGCTTGCGGGAAGGAGCTTTTGAAAACTGGCGATTTCGAGCGGTTTAAAGCGATATCTAGCGGTTTCTATGATTGATGTTAATCGCTAACAACCGCTACCAACCGCAAACGCTGCGTTTGCGGGTGGTAGAGG	CTGCGTTTGCGGGTGGTAGA 0.706336 0	igr_sense, NM_125712.1,NM_111039.2,NM_179277.1,NM_100680.3, 51
205 82 ath-MIR171a NC_003074:19084415-19084533:1	GAGAGAGTCCCTTTGATATTGGCCTGGTTCACTCAGATCTTACCTGACCACACACGTAGATATACATTATTCTCTCTAGATTATCTGATTGAGCCGCGCCAATATCTCAGTACTCTCTC	TGATTGAGCCGCGCCAATATC 0.152409 1	igr_sense, HASH(0xafcf3bc) NM_130079.2,NM_115927.4,NM_127772.1,NM_116232.4, 8
206 30 ath-MIR172d NC_003074:20598883-20599006:1	AGTCATTGTTTGCTATTGCAACATCTTCAAGATTCAGAAATCAGATTCTCTTATGGGTTTTCTTTTGAGCCTTTATTTTTTGGTTTGAGAATCTTGATGATGCTGCAGCGGCAATTAAATGGCT	AGAATCTTGATGATGCTGCAG 1	igr_sense, HASH(0xafd6e74) NM_179982.1,NM_201823.1,NM_112759.3,NM_101959.1,NM_111656.2,NM_126801.1,NM_124799.2,NM_121293.2,NM_201824.1,NM_119856.2,NM_128415.2,NM_125504.1,NM_126118.2,NM_119670.2,NM_180132.1,NM_102967.2,NM_121961.1,NM_114829.2,NM_125405.3, 27
207 80 NC_003074:20702625-20702786:1	TAGAGAAAGGATCCAAAGGGATCGCATTGATCCTAATTAAGCTGATTTATTCCCCAATAATTGTTTTTTTTTTCCTTCTCAATCGAAAGATGGAAGAAAAACAAATTCCAAACATTTTGCTTACTTTTCCGGATCATGCGATCTCTTTGGATTCATTCTTTG	GATCATGCGATCTCTTTGGAT 0.209802 1	igr_sense, NM_127474.2,NM_115836.2,NM_105752.3,NM_116554.2,NM_114709.2, 8
208 122 ath-MIR166b NC_003074:22933182-22933299:1	TGAGGGGACTGTTGTCTGGCTCGAGGACTCTTATTCTAATACAATCTCATTTGAATACATTCAGATCTGATGATTGATTAGGGTTTTAGTGTCGTCGGACCAGGCTTCATTCCCCCCA	TCGGACCAGGCTTCATTCCCC 1	igr_sense, HASH(0xafed0d8) NM_104096.2,NM_124302.1,NM_179464.1,NM_119441.3,NM_129025.2,NM_102785.3,NM_125462.2,NM_106374.2, 11
209 215 NC_003074:23243901-23244045:1	GTTGGATCGCATCTCGTGGATCGTTTGATGGCTAGAGGAGATACTGTGATTGTTGTTGATAATTTCTTCACTGGAAGGAAAGAGAACGTTATGCACCATTTCAGTAACCCTAACTTTGAGATGATCCGTCACGATGTGGTTGAGC	GATGATCCGTCACGATGTGGT 0.328338 1	exon_sense,cds_sense, NM_202904.1,NM_119234.1,NM_118061.3,NM_122017.1,NM_119020.2,NM_147295.1,NM_111965.1, 4
210 216 NC_003075:809098-809222:1	CCAGTGTTCTCTAGAGTGAGAATCTTCACATCACATGGAAGATCTTCTTTATCAGCGGTGAGATCTGATGGATCGAACTTGATTCGAGCTATCTGAACCGCGATTCTCGCCGGAGAGAAGATTGG	GATTCTCGCCGGAGAGAAGA 0.0995637 0	cds_antisense,exon_antisense, NM_102759.2,NM_106190.1,NM_180934.1,NM_106274.2,NM_125832.2,NM_105897.2,NM_202211.1,NM_103350.1,NM_126256.3,NM_111582.2,NM_121450.1,NM_101214.2,NM_116417.2,NM_180933.1,NM_130363.3,NM_125805.2, 9
211 24 NC_003075:1686414-1686492:1	GAAGACACTCGACCTCGTGGTCGAGTGGTGAGGTGAATTTGTGATGTCCTCTACTCGACCAGGGGGTCGAGTGGTCTTC	CTACTCGACCAGGGGGTCGAGTGGTCT 0.589792 1	repeat_sense,igr_sense, NM_124806.1,NM_126793.1,NM_103358.1,NM_122817.1,NM_180584.1,NM_116794.1,NM_113972.1,NM_201705.1,NM_148798.1,NM_148247.1,NM_103339.1,NM_122890.1,NM_103391.1,NM_119847.2,NM_148526.1,NM_147956.1,NM_126888.1,NM_201713.1,NM_148782.1,NM_180576.1,NM_179436.1,NM_122815.1,NM_116802.1,NM_126833.1,NM_147987.1,NM_103342.1,NM_147971.1,NM_202235.1,NM_126781.1,NM_122822.1,NM_122889.1,NM_…
212 24 NC_003075:1695530-1695715:1	GTGAAGACACTCGACCTCGGGGTCGAGTGAGGTGATCGAGTGATGGTCAGGTGATGGAGATGAAGACATTCTACCTCGTGGTCGAGTGGTGAGGTGAAGTGGTGATGTCCTCTACTCGACCAGGGGGTCGAGTGGTCTGCTGAGGTTGTGAAGCGTCTACTCGACCTGGGGGTCGAGTGGTTTTGC	TCTACTCGACCTGGGGGTCGAGTGGT 0.194894 1	repeat_sense,igr_sense, NM_126793.1,NM_122830.1,NM_103358.1,NM_180584.1,NM_116794.1,NM_113972.1,NM_201705.1,NM_148798.1,NM_148247.1,NM_122819.1,NM_103339.1,NM_103391.1,NM_148526.1,NM_147956.1,NM_126888.1,NM_201713.1,NM_148782.1,NM_179436.1,NM_116802.1,NM_126833.1,NM_147987.1,NM_103342.1,NM_202235.1,NM_126781.1,NM_122822.1,NM_113973.1,NM_179432.1,NM_122821.1,NM_120741.2,NM_126773.1,NM_147965.1, 11…
213 24 NC_003075:1695530-1695715:1	GTGAAGACACTCGACCTCGGGGTCGAGTGAGGTGATCGAGTGATGGTCAGGTGATGGAGATGAAGACATTCTACCTCGTGGTCGAGTGGTGAGGTGAAGTGGTGATGTCCTCTACTCGACCAGGGGGTCGAGTGGTCTGCTGAGGTTGTGAAGCGTCTACTCGACCTGGGGGTCGAGTGGTTTTGC	CTCGACCTGGGGGTCGAGTGGT 0.148215 1	repeat_sense,igr_sense, NM_126793.1,NM_103358.1,NM_180584.1,NM_116794.1,NM_113972.1,NM_201705.1,NM_148798.1,NM_148247.1,NM_103339.1,NM_103391.1,NM_148526.1,NM_147956.1,NM_126888.1,NM_201713.1,NM_148782.1,NM_179436.1,NM_116802.1,NM_126833.1,NM_147987.1,NM_103342.1,NM_202235.1,NM_126781.1,NM_122822.1,NM_113973.1,NM_179432.1,NM_122821.1,NM_120741.2,NM_126773.1,NM_147965.1, 971
214 24 NC_003075:1765263-1765367:1	GTGTGATGGAGGTACTCGACCAAGGGGTCGAGTGGTGTGATCGAGTGATGGTCAGGTGGTGGAGATGAAGATACTCGACCATGGGGTCGAGTGGTGGTGTGATGT	GATACTCGACCATGGGGTCGAGTGGTG 1.07901 0	repeat_sense,igr_sense, NM_202974.1,NM_126793.1,NM_103358.1,NM_180584.1,NM_116794.1,NM_113972.1,NM_201705.1,NM_148798.1,NM_148247.1,NM_103339.1,NM_122890.1,NM_120797.1,NM_103391.1,NM_202830.1,NM_148526.1,NM_119977.3,NM_147956.1,NM_114067.1,NM_126888.1,NM_201713.1,NM_148782.1,NM_180576.1,NM_179436.1,NM_116802.1,NM_126833.1,NM_147987.1,NM_103342.1,NM_147971.1,NM_202235.1,NM_126781.1,NM_122822.1,NM_…
215 24 NC_003075:1765265-1765365:1	GTGATGGAGGTACTCGACCAAGGGGTCGAGTGGTGTGATCGAGTGATGGTCAGGTGGTGGAGATGAAGATACTCGACCATGGGGTCGAGTGGTGGTGTGAT	CTCGACCATGGGGTCGAGTGGT 0.722595 0	repeat_sense,igr_sense, NM_126793.1,NM_103358.1,NM_180584.1,NM_116794.1,NM_113972.1,NM_201705.1,NM_148798.1,NM_148247.1,NM_103339.1,NM_202830.1,NM_103391.1,NM_148526.1,NM_147956.1,NM_114067.1,NM_126888.1,NM_201713.1,NM_148782.1,NM_179436.1,NM_116802.1,NM_126833.1,NM_147987.1,NM_103342.1,NM_202235.1,NM_126781.1,NM_122822.1,NM_122828.1,NM_113973.1,NM_179432.1,NM_122821.1,NM_126773.1,NM_147965.1, 873
216 24 NC_003075:1765322-1765410:1	TGGAGATGAAGATACTCGACCATGGGGTCGAGTGGTGGTGTGATGTGATGAGGCCATCTACTCGACTAGGGGGTCGAGTGTTGTCTTGA	TCTACTCGACTAGGGGGTCGAGTGT 0.464753 0	repeat_sense,igr_sense, NM_126793.1,NM_103358.1,NM_180584.1,NM_116794.1,NM_113972.1,NM_201705.1,NM_148798.1,NM_148247.1,NM_103339.1,NM_103391.1,NM_148526.1,NM_147956.1,NM_201713.1,NM_148782.1,NM_179436.1,NM_116802.1,NM_126833.1,NM_147987.1,NM_103342.1,NM_202235.1,NM_126781.1,NM_122822.1,NM_113973.1,NM_179432.1,NM_122821.1,NM_126773.1,NM_147965.1, 679
217 217 NC_003075:2837995-2838096:1	GACCTGGTCATGTCAAATCACTCGACCCCGAGGTCGAGTAGGAGCTTCAAGATCTCAACAGATCACTCGACCCCCAGGTCGAGTAGAGGACATCACTACTTC	GGTCGAGTAGAGGACATCAC 0.108939 1	exon_sense,repeat_sense,cds_sense, NM_122820.1,NM_114100.1, 133
218 24 NC_003075:3088408-3088505:1	GGTGAAGACACTCGACCTCGTGGTCGAGTGATGTGATCGAGTGGTGGTCAGAAGATGGAGATGAAGTCACTCGACCAAGGGGGTCGAGTGATGTGATC	CACTCGACCAAGGGGGTCGAGTGA 0.770072 1	repeat_sense,igr_sense, NM_122820.1,NM_125310.1,NM_126793.1,NM_103358.1,NM_180584.1,NM_116794.1,NM_113972.1,NM_201705.1,NM_148798.1,NM_148247.1,NM_103339.1,NM_103391.1,NM_148526.1,NM_147956.1,NM_114067.1,NM_126888.1,NM_201713.1,NM_148782.1,NM_179436.1,NM_116802.1,NM_126833.1,NM_147987.1,NM_103342.1,NM_202235.1,NM_126781.1,NM_122822.1,NM_122828.1,NM_103402.1,NM_113973.1,NM_179432.1,NM_122821.1,NM_…
219 24 NC_003075:3088406-3088551:1	GAGGTGAAGACACTCGACCTCGTGGTCGAGTGATGTGATCGAGTGGTGGTCAGAAGATGGAGATGAAGTCACTCGACCAAGGGGGTCGAGTGATGTGATCGAGTGGTGGTGTCTTCTACTCGACCTGGGGGTCGAGTGGTCTCTTC	TACTCGACCTGGGGGTCGAGT 0.567649 1	repeat_sense,igr_sense, NM_126793.1,NM_122830.1,NM_103358.1,NM_180584.1,NM_116794.1,NM_113972.1,NM_201705.1,NM_148798.1,NM_148247.1,NM_122819.1,NM_103339.1,NM_103391.1,NM_148526.1,NM_147956.1,NM_126888.1,NM_201713.1,NM_148782.1,NM_179436.1,NM_116802.1,NM_126833.1,NM_147987.1,NM_103342.1,NM_202235.1,NM_126781.1,NM_122822.1,NM_113973.1,NM_179432.1,NM_122821.1,NM_126773.1,NM_147965.1, 1080
220 24 NC_003075:3088521-3088589:1	CTACTCGACCTGGGGGTCGAGTGGTCTCTTCAGATCTTGAAGCTCCTACTCGACCTCTAGGTCGAGTGG	ACTCGACCTCTAGGTCGAGT 0.246702 0	repeat_sense,igr_sense, NM_122820.1,NM_103358.1,NM_180584.1,NM_116794.1,NM_113972.1,NM_148798.1,NM_148247.1,NM_122819.1,NM_103339.1,NM_122890.1,NM_103391.1,NM_148526.1,NM_147956.1,NM_114067.1,NM_126888.1,NM_201713.1,NM_148782.1,NM_180576.1,NM_179436.1,NM_116802.1,NM_126833.1,NM_147987.1,NM_103342.1,NM_147971.1,NM_202235.1,NM_126781.1,NM_122822.1,NM_122889.1,NM_122828.1,NM_113973.1,NM_179432.1,NM_…
221 24 NC_003075:3097498-3097684:1	GATGAAGTCACTCGACCTGGGGGTCGAGTGATGTGATCGAGTGGTGGTCAGAAGATGGAGATGAAGTCACTCGATCTGGGGGTCAAGTGATGTGATCGAGTGGTGGTGTCTTCTACTCGACCTGGGGGTCGAGTGGTCTCTTGAGATCTTGAAGCTCCTACTCGACCTCAGGGTCGAGTGGTTTGTC	TACTCGACCTCAGGGTCGAGTG 0.629783 1	repeat_sense,igr_sense, NM_122820.1,NM_126793.1,NM_103358.1,NM_180584.1,NM_116794.1,NM_113972.1,NM_148798.1,NM_148247.1,NM_122819.1,NM_103339.1,NM_122890.1,NM_103391.1,NM_148526.1,NM_147956.1,NM_114067.1,NM_126888.1,NM_148782.1,NM_180576.1,NM_179436.1,NM_116802.1,NM_126833.1,NM_147987.1,NM_103342.1,NM_147971.1,NM_123689.1,NM_202235.1,NM_126781.1,NM_122889.1,NM_113973.1,NM_179432.1,NM_147959.1,NM_…
222 24 NC_003075:3174655-3174732:1	GAGGGCACTCGACCTCGGGGTCGAGTGGTGAAGTGAAGTGGTGATGTCCTCTACTCGACCTGGTGGTCGAGTGGTCTC	CTACTCGACCTGGTGGTCGAGTGGT 0.596997 0	repeat_sense,igr_sense, NM_122820.1,NM_126793.1,NM_179005.1,NM_122830.1,NM_103358.1,NM_122817.1,NM_180584.1,NM_116794.1,NM_113967.1,NM_113972.1,NM_201705.1,NM_148798.1,NM_148247.1,NM_122819.1,NM_103339.1,NM_103391.1,NM_148526.1,NM_147956.1,NM_114067.1,NM_126888.1,NM_201713.1,NM_148782.1,NM_179436.1,NM_122815.1,NM_116802.1,NM_126833.1,NM_147987.1,NM_103342.1,NM_202235.1,NM_126781.1,NM_122822.1,NM_…
223 24 NC_003075:3174655-3174732:1	GAGGGCACTCGACCTCGGGGTCGAGTGGTGAAGTGAAGTGGTGATGTCCTCTACTCGACCTGGTGGTCGAGTGGTCTC	TCGACCTGGTGGTCGAGTGGT 0.00589679 0	repeat_sense,igr_sense, NM_126793.1,NM_179005.1,NM_103358.1,NM_122817.1,NM_180584.1,NM_116794.1,NM_113967.1,NM_113972.1,NM_201705.1,NM_148798.1,NM_148247.1,NM_103339.1,NM_103391.1,NM_147956.1,NM_126888.1,NM_201713.1,NM_148782.1,NM_179436.1,NM_122815.1,NM_116802.1,NM_126833.1,NM_147987.1,NM_103342.1,NM_202235.1,NM_126781.1,NM_113973.1,NM_179432.1,NM_126773.1,NM_147965.1, 505
224 86 NC_003075:3174684-3174796:1	GAAGTGAAGTGGTGATGTCCTCTACTCGACCTGGTGGTCGAGTGGTCTCTTGAGATCTTGAAGCTCCTACTCGACCTCTGGGTCGAGTGGTTTGGCATGATCAGGTCCGCTTC	GGTCGAGTGGTTTGGCATGATCA 0.146866 1	repeat_sense,igr_sense, NM_148265.1,NM_113972.1,NM_103391.1,NM_126888.1,NM_102530.2,NM_147987.1,NM_202235.1,NM_113973.1,NM_127570.2,NM_147965.1, 179
225 218 NC_003075:3183660-3183791:1	GAACAGTACTCGACCCACGTGGTCGAGTGAATAGCTGGAGTCTTCTTATCTTCCTTGTGCTCGTGTGTCTGGTTGAGTGCGGAATGAAGAAGGCTCTGAAGCTTGTCATCGAGTATGCAGTCGAGTGGTGTC	TCGAGTATGCAGTCGAGTGGTG 0.36767 1	repeat_sense,igr_sense, NM_126793.1,NM_180575.1,NM_113972.1,NM_201705.1,NM_147956.1,NM_126888.1,NM_126833.1,NM_103342.1,NM_202235.1,NM_126781.1,NM_122828.1,NM_113973.1,NM_179432.1,NM_128242.3,NM_126773.1,NM_147965.1, 190
226 24 NC_003075:3183790-3183992:1	TCAAAAGATACTCGACTTCCAGGTTGAGTGACGAGGTCGAGTGGTGGTCTGATGATGGAGGTGAAGACACTCGACCTCATGGTCGAGTAAAGTGATCGAGTGATGGTCTGGTGATGGAGATGAGGGCACTCGACCTCGGGGTCGAGTGGTGAAGTGAAGTGGTGATGTCCTCTACTCGACCTGGTGGTCGAGTGGTCTCTTGA	TACTCGACCTGGTGGTCGAGTGGT 0.688317 1	repeat_sense,igr_sense, NM_122820.1,NM_126793.1,NM_179005.1,NM_122830.1,NM_103358.1,NM_122817.1,NM_180584.1,NM_116794.1,NM_113972.1,NM_113967.1,NM_201705.1,NM_148798.1,NM_148247.1,NM_122819.1,NM_103339.1,NM_103391.1,NM_148526.1,NM_147956.1,NM_114067.1,NM_126888.1,NM_201713.1,NM_148782.1,NM_179436.1,NM_122815.1,NM_116802.1,NM_126833.1,NM_147987.1,NM_103342.1,NM_202235.1,NM_126781.1,NM_122822.1,NM_…
227 24 NC_003075:3183849-3184035:1	GGTGAAGACACTCGACCTCATGGTCGAGTAAAGTGATCGAGTGATGGTCTGGTGATGGAGATGAGGGCACTCGACCTCGGGGTCGAGTGGTGAAGTGAAGTGGTGATGTCCTCTACTCGACCTGGTGGTCGAGTGGTCTCTTGAGATCTTGAAGCTCCTACTCGACCTCTGGGTCGAGTGGTTTGTC	CTACTCGACCTCTGGGTCGAGTGGT 0.134155 1	repeat_sense,igr_sense, NM_122820.1,NM_126793.1,NM_103358.1,NM_180584.1,NM_116794.1,NM_113972.1,NM_148798.1,NM_148247.1,NM_111050.1,NM_122819.1,NM_103339.1,NM_122890.1,NM_103391.1,NM_148526.1,NM_147956.1,NM_114067.1,NM_126888.1,NM_201713.1,NM_148782.1,NM_180576.1,NM_179436.1,NM_116802.1,NM_126833.1,NM_147987.1,NM_103342.1,NM_147971.1,NM_202235.1,NM_126781.1,NM_122822.1,NM_122889.1,NM_103402.1,NM_…
228 24 NC_003075:3269741-3269918:1	CGGTACTCGATCCAGGTGGTCGAGTATCTAGTCGAGTGATTGAGATGGTGGTACTCGGCTTGGTGGTAGAGTGATCGAGTGAAGGTGATGTGGTGGAGGTGATGATACTCGACCACATGGTCGAGTATTAACATCGAGTGGTTGTCTTGGTGGTACTCGACCACAGGGTCGAGTGGTG	GGTACTCGACCACAGGGTCGAGTG 0.906104 1	repeat_sense,igr_sense, NM_122820.1,NM_126793.1,NM_103358.1,NM_180584.1,NM_116794.1,NM_113972.1,NM_201705.1,NM_148798.1,NM_148247.1,NM_122819.1,NM_103339.1,NM_122890.1,NM_103391.1,NM_119847.2,NM_148526.1,NM_147956.1,NM_114067.1,NM_126888.1,NM_148782.1,NM_180576.1,NM_179436.1,NM_116802.1,NM_126833.1,NM_147987.1,NM_114100.1,NM_103342.1,NM_147971.1,NM_202235.1,NM_126781.1,NM_122822.1,NM_122889.1,NM_…
229 24 NC_003075:3269741-3269918:1	CGGTACTCGATCCAGGTGGTCGAGTATCTAGTCGAGTGATTGAGATGGTGGTACTCGGCTTGGTGGTAGAGTGATCGAGTGAAGGTGATGTGGTGGAGGTGATGATACTCGACCACATGGTCGAGTATTAACATCGAGTGGTTGTCTTGGTGGTACTCGACCACAGGGTCGAGTGGTG	CTCGACCACAGGGTCGAGTG 0.818675 0	repeat_sense,igr_sense, NM_122820.1,NM_126793.1,NM_103358.1,NM_180584.1,NM_116794.1,NM_113972.1,NM_201705.1,NM_148798.1,NM_148247.1,NM_122819.1,NM_103339.1,NM_122890.1,NM_103391.1,NM_148526.1,NM_147956.1,NM_114067.1,NM_126888.1,NM_148782.1,NM_180576.1,NM_179436.1,NM_116802.1,NM_126833.1,NM_147987.1,NM_103342.1,NM_147971.1,NM_202235.1,NM_126781.1,NM_122822.1,NM_122889.1,NM_103402.1,NM_113973.1,NM_…
230 219 NC_003075:3314401-3314529:1	TCCTCGACTTCCTGGTAGAGTGGTGTGATCGAGTGATGGTCAGGTGTGGAGGTGATGATACTCGACCAGGTGGTCAAGTGAAGTGATCAAGTGACTCTCATGGTGGTACTCGGCCAGGTGGTCGAGTGG	ATGGTGGTACTCGGCCAGGTGGT 0.0504684 1	repeat_sense,igr_sense, NM_126793.1,NM_103358.1,NM_113468.3,NM_180584.1,NM_201705.1,NM_148247.1,NM_103339.1,NM_201713.1,NM_179436.1,NM_126833.1,NM_123927.1, 73
231 24 NC_003075:3314497-3314584:1	CTCATGGTGGTACTCGGCCAGGTGGTCGAGTGGTGAGGTGAATTGATGAAGTCTTCTTCTCGACCAAGGGGTCGAGTGGTCTCTTGAG	CTCGACCAAGGGGTCGAGTGGT 0.404899 0	repeat_sense,igr_sense, NM_126793.1,NM_103358.1,NM_180584.1,NM_116794.1,NM_113972.1,NM_201705.1,NM_148798.1,NM_148247.1,NM_103339.1,NM_103391.1,NM_148526.1,NM_147956.1,NM_126888.1,NM_201713.1,NM_148782.1,NM_123420.1,NM_179436.1,NM_116802.1,NM_126833.1,NM_147987.1,NM_103342.1,NM_202235.1,NM_126781.1,NM_122822.1,NM_113973.1,NM_179432.1,NM_122821.1,NM_126773.1,NM_147965.1, 810
232 24 NC_003075:3391725-3391812:1	TGATGTAGGTACTCGACCATGTGGTCGAGTGATGTGATCGAGTGACTCTCATGGTGGTACTCGACCAGGTGGTCTAGTGGTAACGTGA	GGTACTCGACCAGGTGGTCTAGTGGT 0.524138 0	repeat_sense,igr_sense, NM_126793.1,NM_103358.1,NM_122817.1,NM_180584.1,NM_116794.1,NM_113972.1,NM_201705.1,NM_148798.1,NM_148247.1,NM_103339.1,NM_103391.1,NM_148526.1,NM_147956.1,NM_201713.1,NM_148782.1,NM_123420.1,NM_179436.1,NM_122815.1,NM_116802.1,NM_126833.1,NM_122143.1,NM_147987.1,NM_103342.1,NM_123927.1,NM_202235.1,NM_126781.1,NM_122822.1,NM_113973.1,NM_179432.1,NM_122821.1,NM_126773.1,NM_…
233 24 NC_003075:3391725-3391812:1	TGATGTAGGTACTCGACCATGTGGTCGAGTGATGTGATCGAGTGACTCTCATGGTGGTACTCGACCAGGTGGTCTAGTGGTAACGTGA	CTCGACCAGGTGGTCTAGTGGT 0.288702 0	repeat_sense,igr_sense, NM_126793.1,NM_103358.1,NM_122817.1,NM_180584.1,NM_116794.1,NM_113972.1,NM_201705.1,NM_148798.1,NM_148247.1,NM_103339.1,NM_103391.1,NM_148526.1,NM_147956.1,NM_201713.1,NM_148782.1,NM_179436.1,NM_122815.1,NM_116802.1,NM_126833.1,NM_147987.1,NM_103342.1,NM_202235.1,NM_126781.1,NM_122822.1,NM_113973.1,NM_179432.1,NM_122821.1,NM_126773.1,NM_147965.1, 330
234 24 NC_003075:3497569-3497657:1	CTCCAAAGATGTGATCGAGTGCTTGGTCGAGTGATGGTATTGGTGGTGAGTGATGATACTCGACCAGGGGGTCGAGTAATATGGTGGAG	TACTCGACCAGGGGGTCGAGTAAT 0.0640795 1	repeat_sense,igr_sense, NM_126793.1,NM_103358.1,NM_122817.1,NM_180584.1,NM_116794.1,NM_113972.1,NM_201705.1,NM_148798.1,NM_148247.1,NM_103339.1,NM_122890.1,NM_119847.2,NM_103391.1,NM_148526.1,NM_147956.1,NM_126888.1,NM_201713.1,NM_148782.1,NM_180576.1,NM_179436.1,NM_122815.1,NM_116802.1,NM_126833.1,NM_147987.1,NM_103342.1,NM_147971.1,NM_202235.1,NM_126781.1,NM_122822.1,NM_122889.1,NM_113973.1,NM_…
235 24 NC_003075:3537301-3537567:1	GGTGGTGATGGTGATACTCGACTTCCAGGTACAGTGATGAGGTCGTGTAGTGGTCTGGCAATGAAGGTGAAGACACTCGACCTCGTGGTCGAGTGATGTGATCGAGTGATGGTCAGGTGATGGAGATGAAGACGCTCGACCTCGTGGTCGAGTGGTGAGGTGAAGTTGTGATGTCTTCTACTCGACCTGGGGGTCGAGTGGTCGAGTGGTGAGGTGAAGTTGTGATGTCTTCTACTCGACCTGGGGGTCGAGTGGTCTCTTGAGATC	ACCTGGGGGTCGAGTGGTCT 0.00717265 0	repeat_sense,igr_sense, NM_126793.1,NM_103358.1,NM_180584.1,NM_116794.1,NM_113972.1,NM_201705.1,NM_148798.1,NM_148247.1,NM_103339.1,NM_103391.1,NM_147956.1,NM_126888.1,NM_179436.1,NM_116802.1,NM_126833.1,NM_147987.1,NM_103342.1,NM_202235.1,NM_126781.1,NM_113973.1,NM_179432.1,NM_147965.1, 278
236 24 NC_003075:3537468-3537609:1	GTGATGTCTTCTACTCGACCTGGGGGTCGAGTGGTCGAGTGGTGAGGTGAAGTTGTGATGTCTTCTACTCGACCTGGGGGTCGAGTGGTCTCTTGAGATCTTGAAGCTCCTACTCGACCTCTGGGTCGAGTGGTTTTGTCAT	TACTCGACCTCTGGGTCGAGTG 0.291332 0	repeat_sense,igr_sense, NM_122820.1,NM_126793.1,NM_103358.1,NM_180584.1,NM_116794.1,NM_113972.1,NM_148798.1,NM_148247.1,NM_111050.1,NM_122819.1,NM_103339.1,NM_122890.1,NM_103391.1,NM_148526.1,NM_147956.1,NM_114067.1,NM_126888.1,NM_201713.1,NM_148782.1,NM_180576.1,NM_179436.1,NM_116802.1,NM_126833.1,NM_147987.1,NM_103342.1,NM_147971.1,NM_202235.1,NM_126781.1,NM_122822.1,NM_122889.1,NM_103402.1,NM_…
237 24 NC_003075:3546736-3546932:1	GGTGATACTCGACTTCCAGGTAGAGTGATGAGGTCGTGTACTGGTCTGGCAATGAAGGTGAAGACACTCGACCTCGTGGTCGAGTGATGTGATCGAGTGATGGTCAGGTGATGGAGATGAAGACGCTCGACCTCGTGGTCGAGTCGTGAGGTGAAGTTGTGATGTCTTCTACTCGACCTGGGGGTCGAGTGGTCTCT	TACTCGACCTGGGGGTCGAGTGGT 0.169642 1	repeat_sense,igr_sense, NM_126793.1,NM_122830.1,NM_103358.1,NM_180584.1,NM_116794.1,NM_113972.1,NM_201705.1,NM_148798.1,NM_148247.1,NM_122819.1,NM_103339.1,NM_103391.1,NM_148526.1,NM_147956.1,NM_126888.1,NM_201713.1,NM_148782.1,NM_179436.1,NM_116802.1,NM_126833.1,NM_147987.1,NM_103342.1,NM_202235.1,NM_126781.1,NM_122822.1,NM_113973.1,NM_179432.1,NM_122821.1,NM_120741.2,NM_126773.1,NM_147965.1, 11…
238 24 NC_003075:3546792-3546979:1	GGTGAAGACACTCGACCTCGTGGTCGAGTGATGTGATCGAGTGATGGTCAGGTGATGGAGATGAAGACGCTCGACCTCGTGGTCGAGTCGTGAGGTGAAGTTGTGATGTCTTCTACTCGACCTGGGGGTCGAGTGGTCTCTTGAGATCTTGAAGCTCCTACTCGACCGCTGGGTCGAGTGGTTTTGTC	CTACTCGACCGCTGGGTCGAGTGGT 0.0611738 1	repeat_sense,igr_sense, NM_122820.1,NM_126793.1,NM_103358.1,NM_180584.1,NM_116794.1,NM_113972.1,NM_148798.1,NM_148247.1,NM_122819.1,NM_103339.1,NM_122890.1,NM_103391.1,NM_148526.1,NM_147956.1,NM_114067.1,NM_126888.1,NM_148782.1,NM_180576.1,NM_179436.1,NM_116802.1,NM_126833.1,NM_147987.1,NM_103342.1,NM_147971.1,NM_202235.1,NM_126781.1,NM_122822.1,NM_122889.1,NM_103402.1,NM_113973.1,NM_179432.1,NM_…
239 24 NC_003075:3904963-3905106:1	TGATGGAAGTACTCGACCTGGGGGTCGAGTGGTGTGATCGAGTGATGGTCGGGTGGTGGAGATGATGATACTCGACCATGGGGTCGAGTGGTGGTGTGAAGTGATAAGGCCTTCTACTCGACCAGGAGGTCGAGTGGTTTGTTA	CTCGACCAGGAGGTCGAGTG 0.160233 1	repeat_sense,igr_sense, NM_126793.1,NM_103358.1,NM_122817.1,NM_180584.1,NM_116794.1,NM_113972.1,NM_201705.1,NM_148798.1,NM_148247.1,NM_122819.1,NM_103339.1,NM_122890.1,NM_103391.1,NM_148526.1,NM_147956.1,NM_126888.1,NM_201713.1,NM_148782.1,NM_180576.1,NM_179436.1,NM_122815.1,NM_116802.1,NM_126833.1,NM_147987.1,NM_103342.1,NM_147971.1,NM_202235.1,NM_126781.1,NM_122822.1,NM_122889.1,NM_113973.1,NM_…
240 24 NC_003075:3905030-3905145:1	ATACTCGACCATGGGGTCGAGTGGTGGTGTGAAGTGATAAGGCCTTCTACTCGACCAGGAGGTCGAGTGGTTTGTTAAAATCGCGGAGCCATCTACTCGACCATGGGGTCGAGTGT	TACTCGACCATGGGGTCGAGT 0.612121 0	repeat_sense,igr_sense, NM_202974.1,NM_126793.1,NM_103358.1,NM_180584.1,NM_116794.1,NM_201705.1,NM_148798.1,NM_148247.1,NM_103339.1,NM_122890.1,NM_103391.1,NM_148526.1,NM_119977.3,NM_147956.1,NM_114067.1,NM_126888.1,NM_201713.1,NM_148782.1,NM_180576.1,NM_179436.1,NM_116802.1,NM_126833.1,NM_147987.1,NM_103342.1,NM_147971.1,NM_202235.1,NM_126781.1,NM_122822.1,NM_122889.1,NM_122828.1,NM_113973.1,NM_…
241 24 NC_003075:3957564-3957707:1	GGTGAAGGCACTCGACCACGGGGTCGAGTGACGTGATCGAGTGTTGGTCAGGAGATACTCGACTTCCAGGTTGAGTGAAGAGGTCGAGTGGTTGTCTGATGATGGAGGTGAAGACACTCGACCTCATGGTCGAGTGAAGTGATC	CACTCGACCTCATGGTCGAGTGA 0.746447 1	repeat_sense,igr_sense, NM_122820.1,NM_103358.1,NM_180584.1,NM_116794.1,NM_113972.1,NM_201705.1,NM_148798.1,NM_148247.1,NM_122819.1,NM_103339.1,NM_122890.1,NM_103391.1,NM_148526.1,NM_147956.1,NM_114067.1,NM_126888.1,NM_112543.1,NM_201713.1,NM_118849.2,NM_148782.1,NM_180576.1,NM_179436.1,NM_116802.1,NM_126833.1,NM_147987.1,NM_114100.1,NM_103342.1,NM_147971.1,NM_118850.3,NM_202235.1,NM_126781.1,NM_…
242 24 NC_003075:4017479-4017585:1	GTGATGATACTCGACCAGGGGGTTGAGTAACATGGTAGAGTAAATGGCCGAGTGTGGTCAGGTGGTGTGGCGAAGTGATACTCGACCAGGGGGTCGAGTGGCGTCAT	GATACTCGACCAGGGGGTCGAGTGG 0.641042 0	repeat_sense,igr_sense, NM_126793.1,NM_103358.1,NM_122817.1,NM_180584.1,NM_116794.1,NM_113972.1,NM_201705.1,NM_148798.1,NM_148247.1,NM_103339.1,NM_122890.1,NM_119847.2,NM_103391.1,NM_148526.1,NM_147956.1,NM_126888.1,NM_201713.1,NM_148782.1,NM_180576.1,NM_179436.1,NM_122815.1,NM_116802.1,NM_126833.1,NM_147987.1,NM_103342.1,NM_147971.1,NM_202235.1,NM_126781.1,NM_122822.1,NM_122889.1,NM_113973.1,NM_…
243 24 NC_003075:4017479-4017585:1	GTGATGATACTCGACCAGGGGGTTGAGTAACATGGTAGAGTAAATGGCCGAGTGTGGTCAGGTGGTGTGGCGAAGTGATACTCGACCAGGGGGTCGAGTGGCGTCAT	CTCGACCAGGGGGTCGAGTGG 0.250029 0	repeat_sense,igr_sense, NM_126793.1,NM_103358.1,NM_122817.1,NM_180584.1,NM_116794.1,NM_113972.1,NM_201705.1,NM_148798.1,NM_148247.1,NM_103339.1,NM_103391.1,NM_148526.1,NM_147956.1,NM_126888.1,NM_201713.1,NM_148782.1,NM_179436.1,NM_122815.1,NM_116802.1,NM_126833.1,NM_147987.1,NM_103342.1,NM_202235.1,NM_126781.1,NM_122822.1,NM_113973.1,NM_179432.1,NM_122821.1,NM_126773.1,NM_147965.1, 990
244 24 NC_003075:4017605-4017673:1	ATACTCGACCAGGGGGTCGAGTAGATGGGAAGAATGGCTCCAAAGTCACTCGACCTGGGGGTCGAGTAT	CACTCGACCTGGGGGTCGAGT 0.0549158 0	repeat_sense,igr_sense, NM_126793.1,NM_122830.1,NM_103358.1,NM_180584.1,NM_116794.1,NM_113972.1,NM_201705.1,NM_148798.1,NM_148247.1,NM_122819.1,NM_103339.1,NM_103391.1,NM_148526.1,NM_147956.1,NM_126888.1,NM_201713.1,NM_148782.1,NM_179436.1,NM_116802.1,NM_126833.1,NM_147987.1,NM_103342.1,NM_202235.1,NM_126781.1,NM_122822.1,NM_113973.1,NM_179432.1,NM_122821.1,NM_126773.1,NM_147965.1, 1068
245 38 NC_003075:4124219-4124325:1	ATCCAGATCCAGTGTCGATCGACACTAGAGGGGTATCGGTCGACACCGTCGTATTGAGTCGTCTCTGAGAAAAGGGTCCCGTATGGTGTCGATCGACACTGGAGGGT	GTATGGTGTCGATCGACACTGGAG 0.782817 1	repeat_sense,igr_sense, NM_114016.1,NM_126896.1,NM_114263.1,NM_126950.1,NM_116818.1,NM_147252.1,NM_114110.1,NM_148529.1,NM_114074.1,NM_114079.1,NM_122848.1,NM_126918.1, 381
246 132 NC_003075:4185499-4185582:1	CTGTACTCAACCCACGTAGTCGAGTGGGAGGTCGAGTGAATAGCTTCTTTTCTTCCTTGTGCTCGAGTGTCTGGTTGAGTGCGG	TGCTCGAGTGTCTGGTTGAGTGC 0.195723 1	repeat_sense,igr_sense, NM_126793.1,NM_179005.1,NM_103358.1,NM_116794.1,NM_113972.1,NM_201705.1,NM_148798.1,NM_148247.1,NM_103339.1,NM_179006.1,NM_147956.1,NM_126888.1,NM_106235.2,NM_201713.1,NM_179436.1,NM_116802.1,NM_126833.1,NM_147987.1,NM_103342.1,NM_202235.1,NM_126781.1,NM_122828.1,NM_113973.1,NM_179432.1,NM_147289.1,NM_126773.1,NM_147965.1, 347
247 34 NC_003075:4193090-4193270:1	GGTGCTGCAGCGCATCAACCCTAACCTCTCTCATGTGGGCCCTTCTAGCCCACCATGTAAATTATTGTTGCGCTTGACGTTTCTCAAACCCAAGACCTCACCCTTTAACAATCTTCCCATAGGACAAGTTGTTACCAATTAACCCACATGAGAGAGATTAGGGTTGATGCGCTGCAGCGCC	AGATTAGGGTTGATGCGCTG 0.351501 1	igr_sense, NM_114305.1, 14
248 24 NC_003075:4425218-4425301:1	ATGTCAAACCACTTGACCCAGAGGTCGAGTAGGAGCTTCAAGATCTCAACAGATCACTCGACCCCCTGGTCGAGTGGAGGACAT	ACTCGACCCCCTGGTCGAGTG 0.395443 0	repeat_sense,igr_sense, NM_122820.1,NM_103358.1,NM_180584.1,NM_116794.1,NM_113972.1,NM_201705.1,NM_148798.1,NM_122819.1,NM_103339.1,NM_122890.1,NM_103391.1,NM_114067.1,NM_126888.1,NM_148782.1,NM_180576.1,NM_116802.1,NM_126833.1,NM_147987.1,NM_114100.1,NM_103342.1,NM_147971.1,NM_202235.1,NM_126781.1,NM_122822.1,NM_122889.1,NM_103402.1,NM_113973.1,NM_179432.1,NM_147959.1,NM_122821.1,NM_180578.1,NM_…
249 24 NC_003075:4530753-4530859:1	GATGACACCACTCGACCACTGGGTCGAGTAACACTTTGTCACACCACCTGACCACCACTCTGACGTTCACTCGGCCACGTTACTCGACCACGAAGTCGAGTATCATC	ACTCGACCACGAAGTCGAGT 0.273708 0	repeat_sense,igr_sense, NM_117528.1,NM_126793.1,NM_122830.1,NM_103358.1,NM_180584.1,NM_116794.1,NM_201705.1,NM_148798.1,NM_148247.1,NM_122819.1,NM_103339.1,NM_122890.1,NM_103391.1,NM_126651.1,NM_148526.1,NM_147956.1,NM_126888.1,NM_148782.1,NM_180576.1,NM_179436.1,NM_116802.1,NM_126833.1,NM_147987.1,NM_114100.1,NM_147971.1,NM_202235.1,NM_126781.1,NM_122822.1,NM_122889.1,NM_113973.1,NM_179432.1,NM_…
250 24 NC_003075:4558959-4559036:1	GAGACCACTCGACCCCCAGGTCGAGCAGAGGACATCACCACTTCACTTCACCACTCGACCACGAGGTCGAGTGCCCTC	CCACTCGACCACGAGGTCGAGTGC 0.399664 0	repeat_sense,igr_sense, NM_122820.1,NM_117954.1,NM_126793.1,NM_103358.1,NM_113671.2,NM_180584.1,NM_116794.1,NM_113972.1,NM_201705.1,NM_148798.1,NM_148247.1,NM_122819.1,NM_103339.1,NM_122890.1,NM_103391.1,NM_148526.1,NM_147956.1,NM_114067.1,NM_126888.1,NM_201713.1,NM_148782.1,NM_180576.1,NM_179436.1,NM_100205.3,NM_116802.1,NM_126833.1,NM_147987.1,NM_114100.1,NM_103342.1,NM_147971.1,NM_202235.1,NM_…
251 38 NC_003075:4740774-4740885:1	GGGGTTGGTGTCGATCGACACCTCTGTTGTGTTGTTCGACACCAATCGCATCTGCGTTCTGGTCATGAAGGTGTCGATCGACACCCAGTTGGTGTCGCTCGACACCGAGCCC	AGTTGGTGTCGCTCGACACCGAG 0.516072 1	repeat_sense,igr_sense, NM_114016.1,NM_121001.2,NM_126896.1,NM_126950.1,NM_111421.2,NM_116818.1,NM_114110.1,NM_148529.1,NM_114079.1,NM_114102.1,NM_103410.1,NM_122848.1,NM_126918.1, 423
252 24 NC_003075:4968040-4968117:1	GAGACCACTCGACCCCCAGGTCGAGCAGAGGACATCACCACTTCACTTCACCACTCGACCACGTGGTCGAGTGCCCTC	CACTCGACCACGTGGTCGAGTG 0.314199 0	repeat_sense,igr_sense, NM_122820.1,NM_126793.1,NM_103358.1,NM_122817.1,NM_180584.1,NM_116794.1,NM_113972.1,NM_201705.1,NM_148798.1,NM_148247.1,NM_122819.1,NM_103339.1,NM_122890.1,NM_103391.1,NM_148526.1,NM_147956.1,NM_114067.1,NM_126888.1,NM_201713.1,NM_148782.1,NM_180576.1,NM_123420.1,NM_179436.1,NM_122815.1,NM_116802.1,NM_126833.1,NM_147987.1,NM_114100.1,NM_103342.1,NM_147971.1,NM_202235.1,NM_…
253 24 NC_003075:5009723-5009851:1	TACTCGACCCTGGGGTCGAGTGGCAGTGATCGAGTGAATGGCGAAAAGTGGAGATGGTGTTACTCGACCAGGCGGTCGAGTGGTGGTGAGAAACTGTGATGACTGCTACTCGACCAAGGGGTCGTGGTG	ACTGCTACTCGACCAAGGGGTCG 0.839772 1	repeat_sense,igr_sense, NM_104588.2,NM_126793.1,NM_103358.1,NM_180584.1,NM_116794.1,NM_201705.1,NM_148798.1,NM_148247.1,NM_103339.1,NM_103391.1,NM_148526.1,NM_147956.1,NM_148782.1,NM_179436.1,NM_116802.1,NM_126833.1,NM_147987.1,NM_103342.1,NM_126781.1,NM_126773.1, 283
254 24 NC_003075:5009723-5009851:1	TACTCGACCCTGGGGTCGAGTGGCAGTGATCGAGTGAATGGCGAAAAGTGGAGATGGTGTTACTCGACCAGGCGGTCGAGTGGTGGTGAGAAACTGTGATGACTGCTACTCGACCAAGGGGTCGTGGTG	CTACTCGACCAAGGGGTCGTG 0.888192 0	repeat_sense,igr_sense, NM_126793.1,NM_103358.1,NM_180584.1,NM_116794.1,NM_201705.1,NM_148798.1,NM_148247.1,NM_103339.1,NM_103391.1,NM_148526.1,NM_147956.1,NM_148782.1,NM_179436.1,NM_116802.1,NM_126833.1,NM_147987.1,NM_103342.1,NM_126781.1,NM_126773.1, 272
255 220 NC_003075:5292672-5292768:1	TGTCAGATCGTTAGTGCATTGGAAAGCTGGTAAAGAGTACTACAAGATGGTATACTCATACGGTTTGCCAGCTTTCCATTGCACTAACCACCTGACA	CCAGCTTTCCATTGCACTAA 1.04569 1	repeat_sense,igr_sense, NM_114689.2,NM_106189.2, 14
256 221 NC_003075:5347900-5348006:1	TGTACCATTGACTTGATCCTCATAATGCTCCCTGAATTTGAAGCACCTATAATCCGGTTGAAACTGTTTATAGTCTTTGAGCATTGTGGAGATCAAATCTTGGTCCA	GAGCATTGTGGAGATCAAAT 0.101293 1	cds_antisense,exon_antisense, NM_116912.1,NM_103271.2,NM_105403.1,NM_120595.2,NM_202324.1,NM_147924.1,NM_114185.1,NM_130020.1,NM_123925.1,NM_117025.4, 10
257 222 NC_003075:6972564-6972679:1	GCTTCGATAGCCGCTTCACCGCAACTTTGGTTTCATTCGTCAGTAATTGTAATATTGTATATTTGTAGGGAATGTTACCAAACGAAACAGAAGTTGCGGTGAAGCGGCTATCGAGT	GAAGTTGCGGTGAAGCGGCT 1.04558 1	exon_sense,cds_sense, NM_127883.1,NM_118406.3,NM_147317.1, 12
258 223 NC_003075:8307494-8307622:1	CTTTCCGTGACCGGTAGTGATGAGGACGGATCCTTTTGTGGATTGAGACTTTGCTTGTTCAAGAAGCGAGAGAACAGAGGCGATCGTGTCGGGGTGGAATCTGTGCTCGTCTTCGCCGGTTAGGGTTAG	TGCTCGTCTTCGCCGGTTAG 0.247315 1	cds_antisense,exon_antisense, NM_114850.1,NM_114521.2,NM_117523.3, 2
259 224 NC_003075:9888995-9889083:1	GTCGTGCCTGGCTCCCTGTATGCCACAAGAAAACATCGATTTAGTTTCAAAATCGATCACTAGTGGCGTACAGAGTAGTCAAGCATGAC	GCGTACAGAGTAGTCAAGCAT 0.0767261 0	igr_sense, NM_117823.2,NM_202178.1,NM_124151.2,NM_202836.1,NM_102295.3, 5
260 225 NC_003075:10578651-10578779:1	TCGGGCTCGGATTCGCTTGGTGCAGGTCGGGAACCAATTCGGCTGACACAGCCTCGTGACTTTTAAACCTTTATTGGTTTGTGAGCAGGGATTGGATCCCGCCTTGCATCAACTGAATCGGATCCTCGA	CGCCTTGCATCAACTGAATC 0.0596043 1	igr_sense, NM_121784.1, 3
261 126 ath-MIR319a NC_003075:12352967-12353140:1	GAGAGAGCTTCCTTGAGTCCATTCACAGGTCGTGATATGATTCAATTAGCTTCCGACTCATTCATCCAAATACCGAGTCGCCAAAATTCAAACTAGACTCGTTAAATGAATGAATGATGCGGTAGACAAATTGGATCATTGATTCTCTTTGATTGGACTGAAGGGAGCTCCCTC	ATTGGACTGAAGGGAGCTCCC 0.687749 1	igr_sense, HASH(0xbad7338) NM_111977.3,NM_101286.2,NM_128253.1,NM_180448.1,NM_128252.1,NM_179399.1,NM_120692.2,NM_117950.4,NM_102760.1, 7
262 226 NC_003075:12605905-12605979:1	GATTTCTCGTCCTCCGGCAATCCTTCGAACTCATCTTCATCCCAGTAATCGAAGGAGATGGAGGACGAAGGCTTC	ATCGAAGGAGATGGAGGACG 0.0872811 0	cds_antisense,exon_antisense, NM_118566.3,NM_115892.2,NM_123338.2,NM_106122.2,NM_129887.2,NM_129016.2,NM_104952.2, 5
263 227 NC_003075:13161546-13161666:1	GGTGGTTGCAGTAGTAGCCACGGCCATCGAGCATCGTCGCAATGAGAGGACTAAAGGCGTCAATGGTCTTGACAAGATCATCATCCGCGACCGTCGTGGCCGATCTGCTGAGGTACTCACT	TCGTGGCCGATCTGCTGAGG 0.510594 0	exon_sense,cds_sense, NM_100993.2,NM_111695.2, 2
264 98 NC_003075:13316784-13316915:1	ACCGTTAACACTCCTTAACAGCGCTCCTAACAGCCGTTACAAAACATGGCCTAACAGCTGTTATCGTTGGTTTAAGGACGAAAACAGTTGTTAGTTATGCTGTTAGGAGAGCTGTTAAGAAGTTTTAACGGT	GTTAGGAGAGCTGTTAAGAAG 0.20322 1	repeat_sense,igr_sense, NM_114951.2,NM_124625.2,NM_128849.1,NM_102048.1, 26
265 228 NC_003075:13543159-13543302:1	GCGAGACAGCTTCGGTTTCGGCTCCATCTGCGTCGTCGCTTCGCAATCAGACGAACCGATCTAAGAGTTTCTCCTCGGCTCTCCGCTCCTTTCGAGTTTGCTCTGCTTCCACGCGGTGGAGCCATGGTGGGAGCTGGGGATCGC	TGGAGCCATGGTGGGAGCTG 0.841556 1	exon_sense,cds_sense, NM_122418.1,NM_123920.1,NM_121442.2, 2
266 229 NC_003075:15681182-15681298:1	GGTGGAGTGATTAAGGAGGCGGAGGATGTGGCGGCGGAACATATATCGAGAGAAGGTACAATGAGTCATTACAGTTTTAGCAAAGGTCTTCTTCCGCCGCTTGGAGTCGGAGCCACC	TTCTTCCGCCGCTTGGAGTC 0.241679 0	exon_sense,cds_sense, NM_112691.1,NM_112954.2,NM_113282.1, 3
267 230 NC_003075:18017243-18017363:1	CCGTGGCCGTCGTAGACGCCAACAAAGGTGCCAAAGGGACCAGAGTCGTGGGAGCTAAGAGAGCCAGACTCGAGCTGGCTCTGGTCCTCTAGCAAGCTGTTGGCTTGAACGACGGCCATGG	TGTTGGCTTGAACGACGGCCAT 0.705603 0	cds_antisense,exon_antisense, NM_104267.1,NM_126006.3,NM_119551.2,NM_127603.2,NM_202682.1,NM_120013.4,NM_112585.2,NM_202292.1,NM_113798.1,NM_202979.1,NM_202709.1,NM_114996.2,NM_104264.1,NM_115363.3, 3
268 231 NC_003075:18511372-18511455:1	GCCCAATTTTTCTTAATGGGTCGTATCAGACTTTATATTTATTCCATCATACTGACTGATACGGCCCATTAAGAACAATTGGGC	ACTGATACGGCCCATTAAGA 0.674075 1	igr_sense, NM_130230.1, 5
269 232 NC_003076:287578-287736:1	CAAGATGGAGAAGCAGGGCACGTGCATTACTAGCTCATATATACACTCTCACCACAAATGCGTGTATATATGCGGAATTTTGTGATATAGATGTGTGTGTGTGTTGAGTGTGATGATATGGATGAGTTAGTTCTTCATGTGCCCATCTTCACCATCATG	ATGTGCCCATCTTCACCATC 0.422331 0	igr_sense, NM_179558.2,NM_124111.1,NM_106174.2,NM_121481.1,NM_117002.2,NM_122585.2,NM_202417.1,NM_111440.2,NM_111713.1,NM_105552.2,NM_113830.2,NM_129293.2,NM_103668.2,NM_114959.1,NM_114687.1, 4
270 122 ath-MIR166c NC_003076:2838636-2838774:1	GCGATTTAGTGTTGAGAGGATTGTTGTCTGGCTCGAGGTCATGAAGAAGAGAATCACTCGAATTAATTTGGAAGAACAAATTAAGAAAACCCTAGATGATTCTCGGACCAGGCTTCATTCCCCCTAACCTACTTATCGC	TCGGACCAGGCTTCATTCCCC 1	igr_sense, HASH(0xbaf3ddc) NM_104096.2,NM_124302.1,NM_179464.1,NM_119441.3,NM_129025.2,NM_102785.3,NM_125462.2,NM_106374.2, 11
271 122 ath-MIR166d NC_003076:2840623-2840735:1	GGTTGAGAGGAATATTGTCTGGCTCGAGGTCATGAAGAAGATCGGTAGATTGATTCATTTTAAAGAGTGAAATCCCTAAATGATTCTCGGACCAGGCTTCATTCCCCCCAACC	CTCGGACCAGGCTTCATTCCCC 0.207996 1	igr_sense, HASH(0xbb14864) NM_104096.2,NM_124302.1,NM_106309.2,NM_179464.1,NM_119441.3,NM_129025.2,NM_102785.3,NM_116563.1,NM_125462.2,NM_106374.2, 11
272 72 NC_003076:3311972-3312062:1	CAATACATTCGTAATCAGACCAAATCCAAGAGCTATACACATGGCAACAATCCGTATAGCTCTTGGATTTGGTCTGATTACGAATGTATTG	CTTGGATTTGGTCTGATTAC 0.27083 1	igr_sense, NM_202635.1,NM_113524.3,NM_180949.1,NM_113525.3,NM_115577.2,NM_126019.2, 7
273 233 NC_003076:4475129-4475222:1	CGGGAAATCGGACGCGGTCAGTGCAATAGTTGTAGATGGTGTATCTCTTACGAACCCATTTGAGACGCTTGTACTGGTTAGCGTCCAAGTCCTG	CTTGTACTGGTTAGCGTCCA 0.162723 0	cds_antisense,exon_antisense, NM_121390.2,NM_127975.1,NM_125168.1,NM_119230.2, 2
274 234 NC_003076:4534019-4534151:1	TCTCTGGGTCTGAGTACATTGCAAGGCTGAGGGCTCATCATGCTAAGCTAAACCCGGGGACTGATTGGGCTCGGCCAGATTCTCAAATAGTTGATGGAGAGTCTTCAGATGATGATGATACTCAGGATGGAGG	GATGATGATGATACTCAGGA 0.0256678 0	exon_sense,cds_sense, NM_104201.3,NM_114632.3,NM_125915.2,NM_115919.1,NM_112870.3,NM_111151.3,NM_115397.1,NM_113636.3,NM_126375.2,NM_116321.3,NM_113028.2,NM_121662.2,NM_114227.4,NM_104198.3,NM_147903.2,NM_121606.1,NM_124287.2,NM_128662.2,NM_124596.1,NM_123427.2,NM_116533.2,NM_130265.2,NM_122640.1,NM_105321.3,NM_124262.2,NM_129245.2,NM_104384.3,NM_105593.2,NM_127969.2,NM_119851.2,NM_130370.2, 18
275 144 ath-MIR398b NC_003076:4691026-4691139:1	GGATCTCGACAGGGTTGATATGAGAACACACGAGTAATCAACGGCTGTAATGACGCTACGTCATTGTTACAGCTCTCGTTTTCATGTGTTCTCAGGTCACCCCTGCTGAGCTCT	TGTGTTCTCAGGTCACCCCTG 1	igr_sense, HASH(0xbb5560c) NM_111512.3,NM_100757.2,NM_112434.2, 4
276 144 ath-MIR398c NC_003076:4694698-4694810:1	GGATCTCGACAGGGTTGATATGAGAACACACGAGCAATCAACGGCTATAACGACGCTACGTCATTGTTACAGCTCTCGTTTCATGTGTTCTCAGGTCACCCCTGCTGAGCTCT	TGTGTTCTCAGGTCACCCCTG 0	igr_sense, HASH(0xbb3d66c) NM_111512.3,NM_100757.2,NM_112434.2, 4
277 235 NC_003076:5078383-5078493:1	GGCGGCGGAATATTCTCGCCGGAAAATGGGGAAAGCTAGAGGAGTTAACAGCGGCGGCGGAGAGAGCTCTCTCGGTTATCTTTTTGGTTCCGGCGAGTCTGTTCCCAAACC	GTTCCGGCGAGTCTGTTCCC 0.467507 0	exon_sense,cds_sense, NM_102699.1,NM_148101.1,NM_118787.2, 2
278 236 NC_003076:6097777-6097960:1	GGGTATGTGAAGCAGAGACAGTTTCAACCTCAGAGACATTGAGTACTTGGTACGAGAAATCAAACAACTCAAAGTGAAGTTGCTGGCCGAGCAAGTAAATAATGGTGCAACCACCCCAAGCTATTGAATCACCGAGGACTTCATGTTGAGCTGACTGTGGAGCTGTTATCTCCTCTAGATATCC	GGAGCTGTTATCTCCTCTAGA 0.221958 1	cds_antisense,exon_antisense, NM_126110.1,NM_119109.1,NM_121564.2,NM_121846.2, 3
279 237 NC_003076:6351237-6351326:1	ATCGATCCTCGCAAACTCGTCGCAATTTGCGAGGGATTTTGGTTACTCGTAAATCCCTCGCAATTTTGCGATGAGTTTGCGAGGATTGAT	TTTGCGATGAGTTTGCGAGGAT 0.277999 1	repeat_sense,igr_sense, NM_104162.1,NM_147313.1,NM_125387.1,NM_100931.2, 42
280 238 NC_003076:7740599-7740713:1	AAGAGCAAGCAGCGCTGGATGCAGAGGTTTATCGATCGATTCTTGCTTTTGTAAACAAAAATAAATATTCACAGGAATTGATCGATGAACCGCTGCCTCCAGCGACTTCACTCTT	TGAACCGCTGCCTCCAGCGA 0.0572549 1	igr_sense, NM_105957.1,NM_113866.2, 3
281 239 NC_003076:7802318-7802409:1	GTAAGTAAGCTCTTGGATGCGCAGTTCTAAGTTGCTCTACCATATAATTGTGCTTTTTCCTGAGGACTGCACATTTAAGAGCCAAAACTTAT	GGACTGCACATTTAAGAGCC 0.102872 1	igr_sense, NM_122326.1,NM_127999.1,NM_120105.2, 2
282 240 NC_003076:9136127-9136220:1	GGTGACAGAAGAGAGTGAGCACACATGGTGGCTTTCTTGCATATTTGAAGGTTCCATGCTTGAAGCTATGTGTGCTCACTCTCTATCCGTCACC	GCTATGTGTGCTCACTCTCT 1.13824 0	igr_sense, NM_202928.1, 10
283 241 NC_003076:9136127-9136220:1	GGTGACAGAAGAGAGTGAGCACACATGGTGGCTTTCTTGCATATTTGAAGGTTCCATGCTTGAAGCTATGTGTGCTCACTCTCTATCCGTCACC	GTGTGCTCACTCTCTATCCG 0.508206 0	igr_sense, NM_101541.1,NM_202928.1,NM_127899.2, 2
284 242 NC_003076:9366743-9366870:1	GACTCAGAGACACGAGAGGCATGGAACTTGGCGATGAAGGCAGAAGCTTTACGGTCAATACCTGGCTCAGCTACCCAATAACGCTTGTCCTCGTCGCTGGCCCATGCCTTTCTTGTGTAAATGACGTC	CCCATGCCTTTCTTGTGTAA 0.0850902 1	cds_antisense,exon_antisense, NM_148342.2,NM_112596.1,NM_180552.1, 2
285 243 NC_003076:10164310-10164434:1	CAAGCAGTTGCAGTTGCAAAGATAAAGAACTTAAACAGATCTACGTGTACAACTTTCTATGGAGACCAAACAGCTTTATACATGTCTAATAAATGAGAATATATCTCTGCAACTGCAACTGCTTG	TATCTCTGCAACTGCAACTGC 0.407137 0	igr_sense, NM_116737.1,NM_124607.2,NM_105835.1,NM_119789.2,NM_112470.2,NM_127498.1,NM_129393.3,NM_126238.1,NM_103938.2,NM_105181.1,NM_115025.2,NM_111456.3,NM_102988.4,NM_116202.1,NM_180073.2,NM_124554.2,NM_180777.1,NM_179174.2,NM_128841.3,NM_100406.3,NM_123422.2,NM_121866.1,NM_125945.3,NM_119437.2,NM_120950.2, 7
286 38 NC_003076:10584053-10584143:1	GGGCTCGGTGTCGATCGACACCTTCGGGAGCAGAACGCGGATGCAATCGGTATTGAATGACACAACAGAGGTGTCGATCGACACCAACACC	GAGGTGTCGATCGACACCAAC 0.567196 0	repeat_sense,igr_sense, NM_114016.1,NM_126896.1,NM_126950.1,NM_147252.1,NM_148529.1,NM_114074.1,NM_114079.1,NM_201961.1,NM_114102.1,NM_148522.1,NM_122848.1,NM_126918.1, 555
287 2 NC_003076:10816756-10816869:1	TATGCAACGAGCATTTCCCTCGCAAATTTGCGAGACGTTTGCGAGGAAACTGCGTGGAAAGCACGATTCTTCGCAAAAACATCGCAAATTTGCGAGGGAGTTGCGAGTAACATA	TCGCAAATTTGCGAGGGAGTTGCG 0.142172 1	repeat_sense,igr_sense, NM_119518.2,NM_104162.1,NM_104476.1,NM_111118.3,NM_113908.1, 194
288 244 NC_003076:10817696-10817798:1	GGATTTACGACAACGCCTCGCAAATCCCTCGCAGAAGAAGTCGCAAAATCCTAATTGAGTAACCCTACTTTTGCGAGGAATTTGTGAGGGTCGTTGCAATTCC	GCGAGGAATTTGTGAGGGTCG 0.249223 1	repeat_sense,intron_sense, NM_129823.2, 14
289 38 NC_003076:11137827-11137910:1	GTAGAGGGGTATCGATCGACACCGTCGTATTGAGTCGTCTCTGAGAAAAGGGTCCCGTATGGTGTCGATCGACACCATCTCTGC	CGTATGGTGTCGATCGACACCAT 0.702771 1	repeat_sense,igr_sense, NM_114016.1,NM_126896.1,NM_126950.1,NM_126178.3,NM_116818.1,NM_147252.1,NM_114110.1,NM_201658.1,NM_148529.1,NM_114097.1,NM_114074.1,NM_114079.1,NM_148282.1,NM_114102.1,NM_148522.1,NM_103410.1,NM_122848.1,NM_126918.1, 994
290 38 NC_003076:11137827-11137910:1	GTAGAGGGGTATCGATCGACACCGTCGTATTGAGTCGTCTCTGAGAAAAGGGTCCCGTATGGTGTCGATCGACACCATCTCTGC	TGGTGTCGATCGACACCATC 0.485591 0	repeat_sense,igr_sense, NM_114016.1,NM_126896.1,NM_126950.1,NM_147252.1,NM_148529.1,NM_114097.1,NM_114074.1,NM_114079.1,NM_148282.1,NM_114102.1,NM_148519.1,NM_148522.1,NM_103410.1,NM_122848.1,NM_126918.1, 725
291 84 NC_003076:11366002-11366154:1	GCGTCTCCCAACTCGTCACCAGCCAGTTCCAGGTTAATTCAAACGATTCGAACTGTTGGGTCAAGGTTTTGACCAGTTCGAGGTACGCTTCTATGCGCTCGTCTTTAGCTTCGTATTCCCCGTGGAACTGGCTGGTGACGAGTTGGGAGTCGT	GGAACTGGCTGGTGACGAGT 0.228882 1	repeat_sense,igr_sense, NM_105252.1,NM_120945.2, 23
292 245 NC_003076:11377364-11377464:1	GGAAATCGATAGACGGGAGGTTCAGGCGCTGCAGCTGGTGGTTGAGGTTGGGAAGGGCGGAGGCCGGCGGCGGTGGAGAAGCTCCTGCGGTGTTGAGCACC	GCGGCGGTGGAGAAGCTCCTGCGGT 0.0322477 1	repeat_sense,igr_sense, NM_147277.1,NM_118673.2,NM_148012.1,NM_124559.2,NM_127497.1,NM_120857.1,NM_128780.2,NM_100256.1,NM_105249.1,NM_115065.2,NM_104202.2,NM_180781.1,NM_127695.1,NM_179310.1,NM_125334.2,NM_116822.1,NM_120351.1,NM_180890.1,NM_123475.2,NM_101037.2,NM_124558.1,NM_100413.2,NM_128778.3,NM_201773.1,NM_121250.2,NM_112567.3,NM_112974.2,NM_105546.2,NM_147878.1,NM_120232.2,NM_115049.2,NM_…
293 60 NC_003076:11825032-11825115:1	GATGAAGTCACTCGGCTTGGGGGTCGAGTGATGTGATCGAGTGGTGTCAGAAGATACTCGACTTCCAGATTGAGTGACGAGGTC	GATACTCGACTTCCAGATTGAGTGA 0.0457596 0	repeat_sense,igr_sense, NM_202755.1,NM_122820.1,NM_180882.1,NM_122885.2,NM_116194.3,NM_102923.2,NM_105416.4,NM_116794.1,NM_100750.2,NM_113972.1,NM_148798.1,NM_123224.2,NM_102785.3,NM_112716.2,NM_147956.1,NM_126888.1,NM_147987.1,NM_103342.1,NM_126781.1,NM_125217.2,NM_122828.1,NM_113973.1,NM_105935.1, 77
294 24 NC_003076:11825032-11825174:1	GATGAAGTCACTCGGCTTGGGGGTCGAGTGATGTGATCGAGTGGTGTCAGAAGATACTCGACTTCCAGATTGAGTGACGAGGTCGAGTGGTGGTCTTATGATGGAGTTACAGACACTCAACCTCATGGTCGAGTGATGTGATC	GACACTCAACCTCATGGTCGAGTG 0.408345 1	repeat_sense,igr_sense, NM_122820.1,NM_129493.2,NM_103358.1,NM_180584.1,NM_116794.1,NM_117124.1,NM_113972.1,NM_148798.1,NM_148247.1,NM_103339.1,NM_103391.1,NM_147956.1,NM_114067.1,NM_126888.1,NM_148782.1,NM_116802.1,NM_147987.1,NM_103342.1,NM_100420.2,NM_202235.1,NM_126781.1,NM_113973.1,NM_179432.1,NM_180578.1,NM_126773.1,NM_147965.1, 185
295 132 NC_003076:11922086-11922176:1	CTGTACTCGACCCATGTGGTCGAGTGGGAGGTCGAGTGAATAACTGGAGTCTTCTTTTCTTCCTTGTGCTCGAGTGTCTGGTTGAGTGCGG	TGCTCGAGTGTCTGGTTGAGTGC 0.197536 1	repeat_sense,igr_sense, NM_126793.1,NM_179005.1,NM_103358.1,NM_116794.1,NM_113972.1,NM_201705.1,NM_148798.1,NM_148247.1,NM_103339.1,NM_179006.1,NM_147956.1,NM_126888.1,NM_106235.2,NM_201713.1,NM_179436.1,NM_116802.1,NM_126833.1,NM_147987.1,NM_103342.1,NM_202235.1,NM_126781.1,NM_122828.1,NM_113973.1,NM_179432.1,NM_147289.1,NM_126773.1,NM_147965.1, 347
296 24 NC_003076:12047941-12048018:1	GAGGGCACTCGACCTCGTGGTCGAGTGGTGAAGTGAAGTGGTGATGTCCTCTGCTCGACCTGGGGGTCGAGTGGTCTC	CTGCTCGACCTGGGGGTCGAGTGGT 0.330711 0	repeat_sense,igr_sense, NM_126793.1,NM_103358.1,NM_180584.1,NM_116794.1,NM_113972.1,NM_201705.1,NM_148798.1,NM_148247.1,NM_103339.1,NM_103391.1,NM_148526.1,NM_147956.1,NM_126888.1,NM_201713.1,NM_148782.1,NM_179436.1,NM_116802.1,NM_126833.1,NM_147987.1,NM_103342.1,NM_202235.1,NM_126781.1,NM_122822.1,NM_113973.1,NM_179432.1,NM_122821.1,NM_120741.2,NM_126773.1,NM_147965.1, 984
297 24 NC_003076:12047978-12048070:1	GTGGTGATGTCCTCTGCTCGACCTGGGGGTCGAGTGGTCTCTTGAGGTCTTGAAGCTCCTACTCGACCTCTGGGTCGAGTGGTTTGTCACGAT	CTACTCGACCTCTGGGTCGAGTGGT 0.126908 0	repeat_sense,igr_sense, NM_122820.1,NM_126793.1,NM_103358.1,NM_180584.1,NM_116794.1,NM_113972.1,NM_148798.1,NM_148247.1,NM_111050.1,NM_122819.1,NM_103339.1,NM_122890.1,NM_103391.1,NM_148526.1,NM_147956.1,NM_114067.1,NM_126888.1,NM_201713.1,NM_148782.1,NM_180576.1,NM_179436.1,NM_116802.1,NM_126833.1,NM_147987.1,NM_103342.1,NM_147971.1,NM_202235.1,NM_126781.1,NM_122822.1,NM_122889.1,NM_103402.1,NM_…
298 132 NC_003076:12059960-12060050:1	CTGTACTCGACCCAGGTGGTCGAGTGAGAGGTCGAGTGAATAGCTGGAGTCTTCTTTTCCTCCTTGTGCTCGAGTGTCTGGTTGAGTGCAG	TGCTCGAGTGTCTGGTTGAGTGC 0.29943 1	exon_sense,repeat_sense,cds_sense, NM_126793.1,NM_179005.1,NM_103358.1,NM_116794.1,NM_113972.1,NM_201705.1,NM_148798.1,NM_148247.1,NM_103339.1,NM_179006.1,NM_147956.1,NM_126888.1,NM_106235.2,NM_201713.1,NM_179436.1,NM_116802.1,NM_126833.1,NM_147987.1,NM_103342.1,NM_202235.1,NM_126781.1,NM_122828.1,NM_113973.1,NM_179432.1,NM_147289.1,NM_126773.1,NM_147965.1, 347
299 24 NC_003076:12060247-12060339:1	GTGGTGATGTCCTCTGCTCGACCTGGGGGTCGAGTGGTCTCTTGAGGTCTTGAAGCTCCTACTCGACCTCTGGGTCGAGTGGTTTGTCACGAT	CTACTCGACCTCTGGGTCGAGTGGT 0.189824 0	repeat_sense,igr_sense, NM_122820.1,NM_126793.1,NM_103358.1,NM_180584.1,NM_116794.1,NM_113972.1,NM_148798.1,NM_148247.1,NM_111050.1,NM_122819.1,NM_103339.1,NM_122890.1,NM_103391.1,NM_148526.1,NM_147956.1,NM_114067.1,NM_126888.1,NM_201713.1,NM_148782.1,NM_180576.1,NM_179436.1,NM_116802.1,NM_126833.1,NM_147987.1,NM_103342.1,NM_147971.1,NM_202235.1,NM_126781.1,NM_122822.1,NM_122889.1,NM_103402.1,NM_…
300 60 NC_003076:12129525-12129607:1	GATGAAGTCACTCGGCCTGGGGTCGAGTGATGTGATCGAGTGGTGTCAGAAGATACTCGACTTCCAGGTTGAGTGACGAGGTC	GATACTCGACTTCCAGGTTGAGTG 0.201308 0	repeat_sense,igr_sense, NM_122820.1,NM_105416.4,NM_116794.1,NM_113972.1,NM_148798.1,NM_123224.2,NM_122819.1,NM_122890.1,NM_147956.1,NM_126888.1,NM_180576.1,NM_147987.1,NM_103342.1,NM_147971.1,NM_126781.1,NM_122889.1,NM_122828.1,NM_113973.1,NM_147959.1,NM_180578.1,NM_147965.1, 135
301 24 NC_003076:12143278-12143464:1	GATGAAGTCACTCGACCTGGGGGTCGAGTGATGTGATCGAGTGGTGGTCATGAGATGGAGATGAAGACACTCGACCTGGGGGTCGAGTGTTGTGGTAGAGTGGCGGTGTCTTCTACTCGACCTGGGGGTCGAGTGGTCTCTTGAGATCTTGAAGCTCCTACTCGACCTCTGGGTCGAGTGGTTTGTC	CTACTCGACCTCTGGGTCGAGTGGT 0.428901 1	repeat_sense,igr_sense, NM_122820.1,NM_126793.1,NM_103358.1,NM_180584.1,NM_116794.1,NM_113972.1,NM_148798.1,NM_148247.1,NM_111050.1,NM_122819.1,NM_103339.1,NM_122890.1,NM_103391.1,NM_148526.1,NM_147956.1,NM_114067.1,NM_126888.1,NM_201713.1,NM_148782.1,NM_180576.1,NM_179436.1,NM_116802.1,NM_126833.1,NM_147987.1,NM_103342.1,NM_147971.1,NM_202235.1,NM_126781.1,NM_122822.1,NM_122889.1,NM_103402.1,NM_…
302 60 NC_003076:12147037-12147120:1	GATGAAGTCACTCGGCCTGGGGGTCGGGTGATGTGACCGAGTGGTGTCAGAAGATACTCGACTTCCAGGTTGAGTGACGAGATC	GATACTCGACTTCCAGGTTGAGTGA 0.24195 0	repeat_sense,cds_antisense,exon_antisense, NM_122820.1,NM_105416.4,NM_116794.1,NM_113972.1,NM_148798.1,NM_123224.2,NM_122819.1,NM_122890.1,NM_147956.1,NM_126888.1,NM_180576.1,NM_147987.1,NM_103342.1,NM_147971.1,NM_126781.1,NM_122889.1,NM_122828.1,NM_113973.1,NM_147959.1,NM_180578.1,NM_147965.1, 140
303 60 NC_003076:12147037-12147120:1	GATGAAGTCACTCGGCCTGGGGGTCGGGTGATGTGACCGAGTGGTGTCAGAAGATACTCGACTTCCAGGTTGAGTGACGAGATC	CTCGACTTCCAGGTTGAGTG 0.800599 0	repeat_sense,cds_antisense,exon_antisense, NM_105416.4,NM_116794.1,NM_113972.1,NM_148798.1,NM_122819.1,NM_147956.1,NM_126888.1,NM_180576.1,NM_147987.1,NM_103342.1,NM_147971.1,NM_126781.1,NM_122828.1,NM_113973.1,NM_147959.1,NM_180578.1,NM_147965.1, 122
304 24 NC_003076:12147189-12147270:1	AGGAGGGCACTTGACCTCGTGGTCGAGTGGTGAAGTGAAGTGGTGATGTCCTCTGCTCGACCTGGGGGTCGAGTGGTCTCTT	CTGCTCGACCTGGGGGTCGAGTG 0.127363 0	repeat_sense,igr_sense, NM_126793.1,NM_103358.1,NM_180584.1,NM_116794.1,NM_113972.1,NM_201705.1,NM_148798.1,NM_148247.1,NM_103339.1,NM_103391.1,NM_148526.1,NM_147956.1,NM_126888.1,NM_201713.1,NM_148782.1,NM_179436.1,NM_116802.1,NM_126833.1,NM_147987.1,NM_103342.1,NM_202235.1,NM_126781.1,NM_122822.1,NM_113973.1,NM_179432.1,NM_122821.1,NM_126773.1,NM_147965.1, 970
305 24 NC_003076:12156246-12156343:1	TGATGGTGATACTCGACATCCAGGTAGAGTGATGAGGTCGAGTAGAGGTCTGGCAATGGGATGAAGTCACTCAGCCTGGGGGTCGAGTGATGTGATCG	ACTCAGCCTGGGGGTCGAGTGAT 0.0196444 0	repeat_sense,intron_sense, NM_126793.1,NM_122830.1,NM_103358.1,NM_180584.1,NM_116794.1,NM_113972.1,NM_148798.1,NM_148247.1,NM_103339.1,NM_103391.1,NM_148526.1,NM_147956.1,NM_126888.1,NM_148782.1,NM_179436.1,NM_116802.1,NM_126833.1,NM_147987.1,NM_103342.1,NM_202235.1,NM_126781.1,NM_113973.1,NM_179432.1,NM_122821.1,NM_126773.1,NM_147965.1, 220
306 60 NC_003076:12156311-12156382:1	GTCACTCAGCCTGGGGGTCGAGTGATGTGATCGAGTGGTGTCAGAAGATACTCGACTTCCAGGTTGAGTGAT	GATACTCGACTTCCAGGTTGAGTG 0.194889 0	exon_sense,repeat_sense,cds_sense, NM_122820.1,NM_105416.4,NM_116794.1,NM_113972.1,NM_148798.1,NM_123224.2,NM_122819.1,NM_122890.1,NM_147956.1,NM_126888.1,NM_180576.1,NM_147987.1,NM_103342.1,NM_147971.1,NM_126781.1,NM_122889.1,NM_122828.1,NM_113973.1,NM_147959.1,NM_180578.1,NM_147965.1, 135
307 60 NC_003076:12156305-12156388:1	GATGAAGTCACTCAGCCTGGGGGTCGAGTGATGTGATCGAGTGGTGTCAGAAGATACTCGACTTCCAGGTTGAGTGATGAGGTC	CTCGACTTCCAGGTTGAGTG 0.76596 0	exon_sense,repeat_sense,cds_sense, NM_105416.4,NM_116794.1,NM_113972.1,NM_148798.1,NM_122819.1,NM_147956.1,NM_126888.1,NM_180576.1,NM_147987.1,NM_103342.1,NM_147971.1,NM_126781.1,NM_122828.1,NM_113973.1,NM_147959.1,NM_180578.1,NM_147965.1, 122
308 24 NC_003076:12157902-12158008:1	GATGATACTCGACCAGGGGGTCGAGTAACGTGGTAGAGTGAATGGTCGAGTGTGGTCAGGTGGTGTGGCGAATTGATTACTCGACCCCTGGGTCGAGTAATGTCGTC	ATTACTCGACCCCTGGGTCGAGTA 0.70865 1	repeat_sense,igr_sense, NM_122820.1,NM_126793.1,NM_103358.1,NM_180584.1,NM_116794.1,NM_113972.1,NM_148798.1,NM_148247.1,NM_122819.1,NM_103339.1,NM_122890.1,NM_103391.1,NM_148526.1,NM_147956.1,NM_114067.1,NM_126888.1,NM_148782.1,NM_180576.1,NM_179436.1,NM_116802.1,NM_126833.1,NM_147987.1,NM_114100.1,NM_103342.1,NM_147971.1,NM_202235.1,NM_126781.1,NM_122822.1,NM_122889.1,NM_122828.1,NM_103402.1,NM_…
309 24 NC_003076:12168071-12168139:1	CTGCTCAACCTGGGGGTCGAGTGGTCTCTTGAGATCTTGAAGCTCCTACTCGACCTCTTGGTCGAGTGG	TACTCGACCTCTTGGTCGAGTG 0.255726 0	repeat_sense,igr_sense, NM_122820.1,NM_126793.1,NM_103358.1,NM_180584.1,NM_116794.1,NM_113972.1,NM_201705.1,NM_148798.1,NM_148247.1,NM_122819.1,NM_103339.1,NM_122890.1,NM_103391.1,NM_148526.1,NM_147956.1,NM_114067.1,NM_126888.1,NM_201713.1,NM_148782.1,NM_180576.1,NM_179436.1,NM_116802.1,NM_126833.1,NM_147987.1,NM_114100.1,NM_103342.1,NM_105009.2,NM_147971.1,NM_202235.1,NM_126781.1,NM_122889.1,NM_…
310 24 NC_003076:12229154-12229290:1	AAGGTACTCGACCATATGATCGAGTAGAGAGATCGAGTGATGTGGCCGAGTGATTGTCTTGGTGGTACTCGACCAGGGGGTCGAGTGATTTTGTGAAGTGATGAGGCCATCTACTCGACCAGGGGGTCGAGTGGTTT	ATCTACTCGACCAGGGGGTCGAGT 0.749026 1	repeat_sense,igr_sense, NM_126793.1,NM_103358.1,NM_122817.1,NM_180584.1,NM_116794.1,NM_113972.1,NM_201705.1,NM_148798.1,NM_148247.1,NM_103339.1,NM_122890.1,NM_119847.2,NM_103391.1,NM_148526.1,NM_147956.1,NM_126888.1,NM_201713.1,NM_148782.1,NM_180576.1,NM_179436.1,NM_122815.1,NM_116802.1,NM_126833.1,NM_147987.1,NM_103342.1,NM_147971.1,NM_202235.1,NM_126781.1,NM_122822.1,NM_122889.1,NM_113973.1,NM_…
311 24 NC_003076:12229152-12229339:1	TGAAGGTACTCGACCATATGATCGAGTAGAGAGATCGAGTGATGTGGCCGAGTGATTGTCTTGGTGGTACTCGACCAGGGGGTCGAGTGATTTTGTGAAGTGATGAGGCCATCTACTCGACCAGGGGGTCGAGTGGTTTGTTGAAGTCATGGAACCATCTACTCGACCAGGGGGTCGAGTGTTTTGCA	ATCTACTCGACCAGGGGGTCGAGTGT 0.498457 1	repeat_sense,igr_sense, NM_126793.1,NM_103358.1,NM_122817.1,NM_180584.1,NM_116794.1,NM_113972.1,NM_201705.1,NM_148798.1,NM_148247.1,NM_103339.1,NM_122890.1,NM_103391.1,NM_119847.2,NM_148526.1,NM_147956.1,NM_126888.1,NM_201713.1,NM_148782.1,NM_180576.1,NM_179436.1,NM_122815.1,NM_116802.1,NM_126833.1,NM_147987.1,NM_103342.1,NM_147971.1,NM_202235.1,NM_126781.1,NM_122822.1,NM_122889.1,NM_113973.1,NM_…
312 24 NC_003076:12229152-12229339:1	TGAAGGTACTCGACCATATGATCGAGTAGAGAGATCGAGTGATGTGGCCGAGTGATTGTCTTGGTGGTACTCGACCAGGGGGTCGAGTGATTTTGTGAAGTGATGAGGCCATCTACTCGACCAGGGGGTCGAGTGGTTTGTTGAAGTCATGGAACCATCTACTCGACCAGGGGGTCGAGTGTTTTGCA	ACTCGACCAGGGGGTCGAGTGT 0.140356 1	repeat_sense,igr_sense, NM_126793.1,NM_103358.1,NM_122817.1,NM_180584.1,NM_116794.1,NM_113972.1,NM_201705.1,NM_148798.1,NM_148247.1,NM_103339.1,NM_122890.1,NM_119847.2,NM_103391.1,NM_148526.1,NM_147956.1,NM_126888.1,NM_201713.1,NM_148782.1,NM_180576.1,NM_179436.1,NM_122815.1,NM_116802.1,NM_126833.1,NM_147987.1,NM_103342.1,NM_147971.1,NM_202235.1,NM_126781.1,NM_122822.1,NM_122889.1,NM_113973.1,NM_…
313 100 NC_003076:12285764-12285905:1	AACGATCGGGAATGAGAGAGAACACTGCAAATTAGAGATCCAAATTCAATGGATGGAGAGTAATCGATTCAGCTTGGATCGTAATTGGTAAGAGCATTGATAAGGGGTTAATTTGCAGTGTTCTCTCTCATTCCCGATCGTT	GTTCTCTCTCATTCCCGATCG 1.01193 0	igr_sense, NM_116381.2,NM_105567.1,NM_120551.2,NM_100876.3,NM_100470.3,NM_112558.3,NM_120385.2, 7
314 38 NC_003076:12336722-12336817:1	TCCAGTGTCGATCGACACTAGAGGGGTATCGATCGACACCGTCATATTGAGTCGTCTCTGAGAAAAGAGTCCCGTATGGTGTCGATCGACACTGGA	TATGGTGTCGATCGACACTG 0.297399 0	repeat_sense,igr_sense, NM_114016.1,NM_116818.1,NM_114110.1,NM_148529.1,NM_114074.1,NM_114079.1,NM_122848.1,NM_126918.1, 154
315 24 NC_003076:12367253-12367350:1	TGATGGTGATACTCGACATCCAGGTAGAGTGATAAGGTCGAGTAGAGGTCTGGCAATGGGATGAAGTCACTCGGCCTGGGGGTCGAGTGATGTGATCG	ACTCGGCCTGGGGGTCGAGTGAT 0.0183443 0	repeat_sense,cds_antisense,exon_antisense, NM_126793.1,NM_103358.1,NM_180584.1,NM_116794.1,NM_113972.1,NM_201705.1,NM_148798.1,NM_148247.1,NM_103339.1,NM_103391.1,NM_148526.1,NM_147956.1,NM_126888.1,NM_148782.1,NM_179436.1,NM_116802.1,NM_126833.1,NM_147987.1,NM_103342.1,NM_115572.1,NM_202235.1,NM_126781.1,NM_113973.1,NM_179432.1,NM_122821.1,NM_126773.1,NM_147965.1, 677
316 60 NC_003076:12367318-12367389:1	GTCACTCGGCCTGGGGGTCGAGTGATGTGATCGAGTGGTGTCAGAAGATACTCGACTTCCAGGTTGAGTGAC	GATACTCGACTTCCAGGTTGAGTG 0.2222 0	repeat_sense,cds_antisense,exon_antisense, NM_122820.1,NM_105416.4,NM_116794.1,NM_113972.1,NM_148798.1,NM_123224.2,NM_122819.1,NM_122890.1,NM_147956.1,NM_126888.1,NM_180576.1,NM_147987.1,NM_103342.1,NM_147971.1,NM_126781.1,NM_122889.1,NM_122828.1,NM_113973.1,NM_147959.1,NM_180578.1,NM_147965.1, 135
317 60 NC_003076:12367312-12367395:1	GATGAAGTCACTCGGCCTGGGGGTCGAGTGATGTGATCGAGTGGTGTCAGAAGATACTCGACTTCCAGGTTGAGTGACGAGGTC	CTCGACTTCCAGGTTGAGTG 0.833405 0	repeat_sense,cds_antisense,exon_antisense, NM_105416.4,NM_116794.1,NM_113972.1,NM_148798.1,NM_122819.1,NM_147956.1,NM_126888.1,NM_180576.1,NM_147987.1,NM_103342.1,NM_147971.1,NM_126781.1,NM_122828.1,NM_113973.1,NM_147959.1,NM_180578.1,NM_147965.1, 122
318 24 NC_003076:12487572-12487668:1	GATGAAGTCACTCGGCCTGGGGGTCGAGTGATGTGATCGAGTGGTGGTCAGAAGATGGAGATGAAGTCACTCGACCTGGGGGTCGAGTGATGTGATC	AAGTCACTCGACCTGGGGGTCGAGTG 0.70055 1	repeat_sense,igr_sense, NM_126793.1,NM_122830.1,NM_103358.1,NM_180584.1,NM_116794.1,NM_113972.1,NM_201705.1,NM_148798.1,NM_148247.1,NM_122819.1,NM_103339.1,NM_103391.1,NM_148526.1,NM_147956.1,NM_126888.1,NM_201713.1,NM_148782.1,NM_179436.1,NM_116802.1,NM_126833.1,NM_147987.1,NM_103342.1,NM_202235.1,NM_126781.1,NM_122822.1,NM_113973.1,NM_179432.1,NM_122821.1,NM_126773.1,NM_147965.1, 1101
319 24 NC_003076:12487572-12487668:1	GATGAAGTCACTCGGCCTGGGGGTCGAGTGATGTGATCGAGTGGTGGTCAGAAGATGGAGATGAAGTCACTCGACCTGGGGGTCGAGTGATGTGATC	CACTCGACCTGGGGGTCGAGTGAT 0.913848 0	repeat_sense,igr_sense, NM_126793.1,NM_122830.1,NM_103358.1,NM_180584.1,NM_116794.1,NM_113972.1,NM_201705.1,NM_148798.1,NM_148247.1,NM_122819.1,NM_103339.1,NM_103391.1,NM_148526.1,NM_147956.1,NM_126888.1,NM_201713.1,NM_148782.1,NM_179436.1,NM_116802.1,NM_126833.1,NM_147987.1,NM_103342.1,NM_202235.1,NM_126781.1,NM_122822.1,NM_113973.1,NM_179432.1,NM_122821.1,NM_126773.1,NM_147965.1, 1100
320 24 NC_003076:12487572-12487758:1	GATGAAGTCACTCGGCCTGGGGGTCGAGTGATGTGATCGAGTGGTGGTCAGAAGATGGAGATGAAGTCACTCGACCTGGGGGTCGAGTGATGTGATCGAGTGGTGGTGTCTTCTACTCGACCTGAGGGTCGAGTGGTCTCTTGAGATCCTGAAGCTCCTACTCGACCTCTGGGTCGAGTGGTTTGTC	CTACTCGACCTCTGGGTCGAGTGGT 0.492771 1	repeat_sense,igr_sense, NM_122820.1,NM_126793.1,NM_103358.1,NM_180584.1,NM_116794.1,NM_113972.1,NM_148798.1,NM_148247.1,NM_111050.1,NM_122819.1,NM_103339.1,NM_122890.1,NM_103391.1,NM_148526.1,NM_147956.1,NM_114067.1,NM_126888.1,NM_201713.1,NM_148782.1,NM_180576.1,NM_179436.1,NM_116802.1,NM_126833.1,NM_147987.1,NM_103342.1,NM_147971.1,NM_202235.1,NM_126781.1,NM_122822.1,NM_122889.1,NM_103402.1,NM_…
321 246 NC_003076:12512432-12512528:1	AATGTCCGCCAGCTCGGGATCGATCGTTCCCGTTCTAGCAGACGATTTTACTTCGTGGATGAGTTTTGGATCGATCGATCCCGAACTGGGGAACATT	GGATCGATCGATCCCGAACTGG 0.911381 0	igr_sense, NM_113998.2, 39
322 24 NC_003076:12548178-12548260:1	GATGATGATACTCGACCACGAGGTCGAGTGGTTGTGTGAAGTGGTGAGGCCTTCTACTCGACCAGGGGGTCGAGTGGTTTGTT	TACTCGACCAGGGGGTCGAGT 0.716108 0	repeat_sense,igr_sense, NM_126793.1,NM_103358.1,NM_122817.1,NM_180584.1,NM_116794.1,NM_113972.1,NM_201705.1,NM_148798.1,NM_148247.1,NM_103339.1,NM_122890.1,NM_119847.2,NM_103391.1,NM_148526.1,NM_147956.1,NM_126888.1,NM_201713.1,NM_148782.1,NM_180576.1,NM_179436.1,NM_122815.1,NM_116802.1,NM_126833.1,NM_147987.1,NM_103342.1,NM_147971.1,NM_202235.1,NM_126781.1,NM_122822.1,NM_122889.1,NM_113973.1,NM_…
323 24 NC_003076:13152421-13152517:1	GATGAAGTTACTCGACCTGGGGGTCGAGTGATGTGATCGGGTGGTGGTCAGAAGATGGAGATGAAGTCACTCGACCTGGGGGTCGAGTGATGTGATC	GTCACTCGACCTGGGGGTCGAGTGA 0.80423 0	repeat_sense,igr_sense, NM_126793.1,NM_122830.1,NM_103358.1,NM_180584.1,NM_116794.1,NM_113972.1,NM_201705.1,NM_148798.1,NM_148247.1,NM_122819.1,NM_103339.1,NM_103391.1,NM_148526.1,NM_147956.1,NM_126888.1,NM_201713.1,NM_148782.1,NM_179436.1,NM_116802.1,NM_126833.1,NM_147987.1,NM_103342.1,NM_202235.1,NM_126781.1,NM_122822.1,NM_113973.1,NM_179432.1,NM_122821.1,NM_126773.1,NM_147965.1, 1101
324 24 NC_003076:13152421-13152517:1	GATGAAGTTACTCGACCTGGGGGTCGAGTGATGTGATCGGGTGGTGGTCAGAAGATGGAGATGAAGTCACTCGACCTGGGGGTCGAGTGATGTGATC	CTCGACCTGGGGGTCGAGTGA 0.624928 0	repeat_sense,igr_sense, NM_126793.1,NM_103358.1,NM_180584.1,NM_116794.1,NM_113972.1,NM_201705.1,NM_148798.1,NM_148247.1,NM_103339.1,NM_103391.1,NM_148526.1,NM_147956.1,NM_126888.1,NM_201713.1,NM_148782.1,NM_179436.1,NM_116802.1,NM_126833.1,NM_147987.1,NM_103342.1,NM_202235.1,NM_126781.1,NM_122822.1,NM_113973.1,NM_179432.1,NM_122821.1,NM_126773.1,NM_147965.1, 975
325 24 NC_003076:13152539-13152666:1	GATGAAGACACTCGACCTGGGGGTCGAGTGATGTGGTAGAGTGGCGGTGTCTTCTACTCGACCTGGGGGTCGAGTGGTCTCTTGAGATCTTGAAGCTCCTACTCGACCTCTGGGTCGAGTGGTTTGTC	CTACTCGACCTCTGGGTCGAGTGGT 0.194087 0	repeat_sense,igr_sense, NM_122820.1,NM_126793.1,NM_103358.1,NM_180584.1,NM_116794.1,NM_113972.1,NM_148798.1,NM_148247.1,NM_111050.1,NM_122819.1,NM_103339.1,NM_122890.1,NM_103391.1,NM_148526.1,NM_147956.1,NM_114067.1,NM_126888.1,NM_201713.1,NM_148782.1,NM_180576.1,NM_179436.1,NM_116802.1,NM_126833.1,NM_147987.1,NM_103342.1,NM_147971.1,NM_202235.1,NM_126781.1,NM_122822.1,NM_122889.1,NM_103402.1,NM_…
326 247 NC_003076:14312867-14312987:1	GACTGGTTTGGTGTCGATCGACACATTATTGGTGTCGGTCGATACTGTCTGTTTCTGCAGTATCTGTGTTCACTGGTATCGATCGACACCAAGTAGTGTCGGTCGACACTGATATCTGGTC	GTAGTGTCGGTCGACACTGA 0.0446292 0	repeat_sense,igr_sense, NM_114016.1,NM_116818.1,NM_147943.1,NM_148529.1,NM_114079.1,NM_126918.1, 35
327 110 NC_003076:14318447-14318602:1	AAGTTGTTCGTTTGCCTGTCGCTGGTTCAACGACCAAAAGTAGCGAGAGTCGCCAGCGACCAGCGATCGCAATTTTTGATCGCTAAAATTTTTAGCGATCAGTCGCTAGTTTCAGCGATTAGTCGCTGAATCCAGCGACATGCAAACGAACAACTT	TCCAGCGACATGCAAACGAACAA 0.17232 1	igr_sense, NM_100444.1,NM_122608.1,NM_202257.1,NM_128095.2, 73
328 248 NC_003076:15775333-15775420:1	CTTAGAAGAAGCAAAATGACGACTCGGACAACAATAATACAAAACTAATACTTATTGTTGTCGGAGTCGTCATTTTGCATCTTCTAAG	TTGTCGGAGTCGTCATTTTGC 0.518712 0	igr_sense, NM_120977.2,NM_116500.2,NM_128005.2, 4
329 249 NC_003076:16312465-16312601:1	CTGTAAATTTCGTGTAGAAGAATGTCTGTATCACTTTAGGGTTTGTAATCGATTTGGCTTACTTGGGATTTACTTAGAATTCTAGATTTTGTTCAAATTTTGAAGCTTTGTGGTTGTTGTTCTACAGGGTTTTAAAG	GTGGTTGTTGTTCTACAGGG 0.00292347 0	exon_sense,cds_sense, NM_124506.1,NM_180197.1,NM_111573.3,NM_100767.3,NM_125773.2,NM_124554.2,NM_121655.1, 2
330 250 NC_003076:16626187-16626269:1	AACGTAAAAAAGAAACCCAACAGCATCATCATTTGAAAAGAAACCATACGTATGATGATGCTGTTGGGTTTCTCTTTTACGTT	ATGATGCTGTTGGGTTTCTC 0.812501 1	igr_sense, NM_120575.2,NM_179121.1,NM_180789.1,NM_116041.2,NM_120353.2,NM_105942.2,NM_123573.3,NM_102563.2,NM_124604.2,NM_118825.2,NM_111300.1,NM_179122.1, 4
331 251 NC_003076:16733799-16733923:1	GGTTCCGAGTTGTTGAAACTTATTTGGGGATGTGATGTGAAATTGGCTTGTTCTATCTTAAGTAAGTTATACTCAACAACAGATTTCACATCATATCTCCAAATCAGTTTTAACAACTCAGAACC	TCTCCAAATCAGTTTTAACA 0.293315 1	cds_antisense,exon_antisense, NM_119017.3,NM_115320.2,NM_102265.2,NM_118309.2,NM_124178.1,NM_129257.2,NM_111027.2,NM_148069.1,NM_147861.1,NM_127448.2,NM_100462.4,NM_179652.1, 10
332 252 NC_003076:16993708-16993808:1	GGCAGACTTCTCGTCTTGCGATGGAGGTGATTAATCTCAAGTTCGTCGATACCTCATCGAAGGGGGGACATGGTCACTTCCAGACCAGCGAGGAAAAGGCC	GTCACTTCCAGACCAGCGAG 0.192852 0	igr_sense, NM_127446.2,NM_124293.2,NM_116968.1,NM_123449.2,NM_180779.1, 4
333 122 ath-MIR166f NC_003076:17533528-17533632:1	AAGTTCAGGTGAATGATGCCTGGCTCGAGACCATTCAATCTCATGATCTCATGATTATAACGATGATGATGATGATGTCGGACCAGGCTTCATTCCCCTCAACTT	GTCGGACCAGGCTTCATTCCCC 0.0294855 1	igr_sense, HASH(0xc321edc) NM_104096.2,NM_124302.1,NM_179464.1,NM_118388.1,NM_119441.3,NM_129025.2,NM_102785.3,NM_125462.2,NM_106374.2, 11
334 253 NC_003076:17608463-17608617:1	GGAACCGTCTCCGCCTCGTGTTTCATCACGCGCCGCCGTGATTCTTCGACTACGAGGTTCATGAGTTTTCCTCCGTCTGGCTCGATCAACCCCGATTTAACGGAGAGGCCACGGCGGGAAACTTGACGGGGGAGAGATACGACGGAGATGGATCC	AGAGATACGACGGAGATGGA 0.0473004 1	cds_antisense,exon_antisense, NM_202774.1,NM_127118.2,NM_128106.2,NM_115402.2,NM_104261.2,NM_105934.2,NM_123080.1,NM_123745.3,NM_123443.3,NM_180778.1,NM_114635.2,NM_103528.1, 5
335 254 NC_003076:20009039-20009132:1	CAACAGGAAGTGGAACTTGGTTCTCTAACAGGAAGTGGAACTTGATTCCAATATGATGAGTAGCTGTTAGAGAACCAAGTTCCACTTCCTGTTG	GCTGTTAGAGAACCAAGTTCCA 0.509013 1	igr_sense, NM_111408.2,NM_179663.1,NM_119503.1,NM_117738.2,NM_112713.2,NM_127926.2,NM_101212.2,NM_106570.2, 6
336 255 NC_003076:20366252-20366342:1	CATTCCCTTACTTTGTCCGCCAAATTATTTAAGACTTCGTTTGGATACTCTGTTTTGGGAGAAGGAATCAGTTGGGGAGAAAGTAGTTATG	GAATCAGTTGGGGAGAAAGTA 0.00348547 0	igr_sense, NM_100548.1,NM_120376.1,NM_118272.3,NM_112139.1,NM_128118.2,NM_125591.1,NM_124094.2, 5
337 36 ath-MIR405b NC_003076:20649773-20649836:1	AATGAGTTATGGGTTAGACCCAACTCATTTAACAAAATGAGTTGGGTCTAACCCATAACTCATT	ATGAGTTGGGTCTAACCCATAACT 1	repeat_sense,igr_sense, NM_113768.2,NM_180674.2,NM_113585.2,NM_106502.1,NM_111609.1,NM_112601.3,NM_124203.1, 98
338 256 NC_003076:21865582-21865756:1	TTCCGGCTCTGAATCTGGTTTGGAAAGTGGAAGCGAATCGGAGAAGGAAGAGAGACGTAGAAGTAGAAAGGATAGAGGGAAGAGGAAATCAGATCGGAAATCATCTAGGAGTAGGAGAAGACGTCGTGATTATTCGAGTAGTAGCTCAGATTCCGAATCAGAATCGGAGTCGGAA	TCCGAATCAGAATCGGAGTC 0.184432 1	exon_sense,cds_sense, NM_127912.1,NM_102259.1,NM_101024.1,NM_104473.1,NM_104596.1,NM_116263.1,NM_128450.1,NM_116205.3,NM_202438.1,NM_104393.3,NM_116306.2,NM_106456.1,NM_124828.1,NM_180409.1,NM_105998.2,NM_148043.1,NM_118286.2,NM_106222.2,NM_105589.2,NM_122341.1,NM_120648.2,NM_125062.1,NM_125168.1,NM_128426.2,NM_202407.1,NM_179534.1,NM_111614.2, 10
339 257 NC_003076:23372835-23372906:1	GGCGGATGGGGCGCGGCGGCGCGTTCCTGTGACGCTTGTAAATCAGTTACCGCCGCCGTGTTCTGTCGAGTT	ACCGCCGCCGTGTTCTGTCGA 0.286204 0	exon_sense,cds_sense, NM_112122.2,NM_115121.3,NM_124976.1, 6
340 30 ath-MIR172e NC_003076:24005707-24005813:1	GATGCAGCACCATTAAGATTCACAAGAGATGTGGTTCCCTTTGCTTTCGCCTCTCGATCCGCAGAAAAGGGTTCCTTATCGAGTGGGAATCTTGATGATGCTGCATC	GTGGGAATCTTGATGATGCTGCAT 0.297813 1	igr_sense, HASH(0xc367888) NM_111990.2,NM_106248.2,NM_179982.1,NM_201823.1,NM_123087.1,NM_111159.1,NM_122733.2,NM_122958.2,NM_104294.2,NM_180038.1,NM_101311.3,NM_127684.2,NM_121293.2,NM_129800.2,NM_201824.1,NM_119856.2,NM_128415.2,NM_126118.2,NM_103052.3,NM_111737.3,NM_202097.1,NM_125405.3, 29
341 116 NC_003076:24220545-24220703:1	AAAGTTTCTGCTAGAACCATTAGCAGGAAAATCACGAAGAGCATACAGCTTATACTCAGATAACAATCTTATCAAGATAGATACAAATGTCTCATAGCCATCAGAAATCTCTAGATATCACAAACGGATCTTCCTGCTAATGGTTCTAGCAGAAACTTT	TCCTGCTAATGGTTCTAGCAGAA 0.751364 1	igr_sense, NM_120341.2,NM_102664.3,NM_106594.2,NM_119923.2,NM_125249.2,NM_105839.2,NM_112178.2,NM_128089.2,NM_101806.2,NM_180142.1, 6
342 258 NC_003076:24310377-24310464:1	AAGATTTGCTTCGCAGGAGAGATAGCGCCATCACCTCTTCTAAGAAGTTAACTAGTGGTGACGGTATCTCTCCTACGTAGCAATCCTT	TATCTCTCCTACGTAGCAATC 0.254952 0	igr_sense, NM_112036.2,NM_127902.1,NM_100381.2,NM_103658.2, 2
343 66 ath-MIR399c NC_003076:24979711-24979824:1	GGAGCAGTAATAGGGCATCTTTCTATTGGCAGGCGACTTGGCTATTTGTATCTTTTGTGTTCTTGACTATTGGCTATGTCACTTGCCAAAGGAGAGTTGCCCTGTCACTGCTTC	TTGCCAAAGGAGAGTTGCCCTG 0.481699 1	igr_sense, HASH(0xc389168) NM_116234.2,NM_179017.1,NM_113146.1,NM_179887.1,NM_111526.3,NM_115327.2, 9
344 122 ath-MIR166g NC_003076:25522032-25522135:1	GGGTTTAGAGGAATGTTGTTTGGCTCGAGGTCATGGAGAGTAATTCGTTAACCCAACTCAAAACTCTAAATGATTCTCGGACCAGGCTTCATTCCCCTCAACCT	CTCGGACCAGGCTTCATTCCCC 0.254681 1	igr_sense, HASH(0xc38a79c) NM_104096.2,NM_124302.1,NM_106309.2,NM_179464.1,NM_119441.3,NM_129025.2,NM_102785.3,NM_116563.1,NM_125462.2,NM_106374.2, 11
345 259 NC_003076:25542367-25542468:1	GTTTTCTTTTTCGGGCTTGATGGGTAAAGAGAATCAGTTGGAGACAACAAATTGTGGAGTCAATGATCACGATTGTCCACCCGTCAAGAACGAGGAACTAGC	CACCCGTCAAGAACGAGGAA 0.166897 0	exon_sense,cds_sense, NM_128320.1,NM_202484.1,NM_111250.2,NM_119012.1, 2
346 122 ath-MIR165a NC_003070:78927-79037:-1	GTTGAGGGGAATGTTGTCTGGATCGAGGATATTATAGATATATACATGTGTATGTTAATGATTCAAGTGATCATAGAGAGTATCCTCGGACCAGGCTTCATCCCCCCCAAC	TCGGACCAGGCTTCATCCCCC 1	igr_sense, HASH(0xc3ac97c) NM_104096.2,NM_179464.1,NM_119441.3,NM_129025.2,NM_102785.3,NM_125462.2, 9
347 260 NC_003070:234010-234155:-1	GAAATGATGCGCAAATGCGGATATCAATGTAAATCAGGACAACAAACCAATAGAGGTGCTCAGCGAAAACAACAAAATGTGAAAAGGGTTTATCAGAAACATTGGGGTCATGATATACCTTTATATCCGCATTTGCGCATCATCTC	ACCTTTATATCCGCATTTGCG 0.26462 1	intron_sense, NM_122176.2,NM_127912.1,NM_101511.4,NM_127329.1,NM_113893.1,NM_111874.1,NM_122172.1,NM_126466.1,NM_148043.1,NM_125905.2,NM_179344.1,NM_116302.3,NM_100862.1, 5
348 261 NC_003070:1456727-1456860:-1	CATTGGATTTGGGGCTTTGAGATTTTCTGGGCCATCGCCACACTTTCTCTGGCCAATATTGAAAGGTGTGGTCGGCAACCTTTAACAGATTTGGGTTGGATGGGCCAGAAATTCTCAAAGCCCCAAATCAAATG	CCAGAAATTCTCAAAGCCCC 0.393297 1	igr_sense, NM_104009.1, 12
349 262 NC_003070:2824720-2824866:-1	CCGGCTAGTCGAAAGCGCGTTGCCCAAAAAATTGTGTCGGTCGGATCGCTGAGAAAAAACGAGCGCATTAAGGTAAAATATAGTCACGTTTGAGTCTTCGGGCGAGTTCGTATCGTCAGATTTGAGAACGCGTCGTCGACGAGTTAG	GAGAACGCGTCGTCGACGAGT 0.0971944 1	intron_sense, NM_102612.3,NM_129125.1,NM_117777.1, 2
350 263 NC_003070:2946786-2946920:-1	TAGCTTTTGAGAACTCAAAACCTTCTACTTTGAAGAAAATATAACAACCAATATGCCCATACCAAGGCTACTCTAAGCAATCAAATTAACAATGTGGTCGACAACAAGTAGAAGGGAGTGAGTTCTCGATAGTTA	TAGAAGGGAGTGAGTTCTCG 0.375574 1	intron_antisense, NM_148234.1,NM_104908.3,NM_111515.3,NM_100765.3,NM_101036.2, 3
351 82 ath-MIR171b NC_003070:3961358-3961459:-1	GGTAACGCGAGATATTAGTGCGGTTCAATCAAATAGTCGTCCTCTTAACTCATGGAGAACGGTGTTGTTCGATTGAGCCGTGCCAATATCACGCGGTAAACC	GATTGAGCCGTGCCAATATCACG 0.405334 1	igr_sense, HASH(0xc3c5f24) NM_130079.2,NM_122231.2,NM_125541.1,NM_114584.2,NM_115927.4,NM_116232.4, 9
352 98 NC_003070:4209304-4209435:-1	ACCGTTAACATTTCTTAATAGCGCTCCTAACAGCCATTACAAAACATGGCCTAACAGCCGTTGTCGTTGGTTTAAGGACGAAAACAATTGTTAGTTACGCTGTTAGGAGAGCTGTTAAGAAGTGTTAACGGT	GTTAGGAGAGCTGTTAAGAAG 0.320669 1	repeat_sense,igr_sense, NM_114951.2,NM_124625.2,NM_128849.1,NM_102048.1, 26
353 264 NC_003070:5157726-5157833:-1	GGGAGTTAGACGACCAGAAGATGGCGGTGACGTTTAGAGGGCTGGATGGTCATGTGATGGAGCAGCTTAAGGTGTATGACGTCATCTTCCAATTCGTCCCTAAGTCTC	CGTCATCTTCCAATTCGTCC 0.101711 0	exon_sense,cds_sense, NM_104428.2,NM_122039.2,NM_122726.1,NM_128707.2,NM_119943.2,NM_112724.3,NM_120382.2, 6
354 265 NC_003070:7065535-7065705:-1	AGCTGGCTCTTCTGGGCGAGCTGGCTGATCTTCGACGAGCAGACTTCTCTCGACGAGCTGACTTGTATCGATGAGCTGGCTCTTCTGGGCGAGCTGGATGATCTTGACGAGCAGACTTCTCTCGACGAGCTGACTTGTATCGATGAGCTGGCTCTTCCGGGCGAACTGGCT	AGCTGGCTCTTCCGGGCGAA 0.0956759 1	igr_sense, NM_118848.2,NM_121546.2,NM_118849.2,NM_118850.3,NM_118851.1, 13
355 266 NC_003070:8044259-8044397:-1	GCAATAAAAAAAGCTCGACTAGGAGACAGTAGCCAAGTAGAGCACTTCATCAACGAAGTGCTCATACTCTCTCAAATTAATCACATGAACGTAATCAAGATTTTGGGCTGCTGTCTGGAGATCGAGCTTTTTTTATTGC	TGCTGTCTGGAGATCGAGCTT 0.0953567 1	exon_sense,cds_sense, NM_112688.3,NM_180797.1,NM_116621.1,NM_127808.2,NM_123779.3,NM_103129.1,NM_100331.2,NM_180796.1, 2
356 36 NC_003070:8276549-8276616:-1	TTAAATGAGTTATGGGTTGACCCAACCCATTTAACAAAATGAGTTGGGTCATCCCATAACTCATTTAA	AGTTGGGTCATCCCATAACT 0.806156 0	repeat_sense,igr_sense, NM_119898.2,NM_129765.2, 91
357 267 NC_003070:8294977-8295091:-1	TCACCAGGCTCTCAATCACTTCCACAATCCGCATATCCCGTCACCGGTTTAGGCGACCTAATGCTCAATGCCTCCATGTTCGTCTCGGATTGTGGAATGTTTCAGTGCTTGGTGA	CGGATTGTGGAATGTTTCAG 0.213482 1	igr_sense, NM_113158.2,NM_102959.2,NM_179834.1, 4
358 68 ath-MIR395a NC_003070:9363182-9363276:-1	GATGTCTCCTAGAGTTCCTCTGAGCACTTCATTGGGGATACAATTTTTCTAAATGATTATCCACTGAAGTGTTTGGGGGAACTCCCGGACCCATT	CTGAAGTGTTTGGGGGAACTCC 0.791721 1	igr_sense, HASH(0xc3ef96c) NM_117550.2,NM_113189.2,NM_111756.2,NM_127695.1,NM_201773.1,NM_128437.2,NM_123745.3,NM_121056.2,NM_118515.3, 15
359 2 NC_003070:13574873-13574984:-1	TCCATCGCAAACATTGCGAGGGATTTGCTACTACGATCGCTGGAACTTGCAACTCCCTCGCAGGTTTGCTATAGAAATATTCATTGCAAATCCCTCGCAACTTTTGCGAGGA	ATCCCTCGCAACTTTTGCGA 0.667071 1	repeat_sense,igr_sense, NM_112129.1,NM_104162.1,NM_147313.1,NM_122762.1, 78
360 24 NC_003070:13777878-13777955:-1	GAGGACACTCGACCTCGTGGTCGAGTGGTGAGGTGAAGTGGTGATTTCTTCTACTCGATCTTGGGGTCGAGTGGTCTC	TCTACTCGATCTTGGGGTCGAGTGGT 0.710179 0	repeat_sense,igr_sense, NM_122905.1,NM_126793.1,NM_103358.1,NM_180584.1,NM_116794.1,NM_113972.1,NM_201705.1,NM_148798.1,NM_148247.1,NM_103339.1,NM_103391.1,NM_148526.1,NM_147956.1,NM_126888.1,NM_148782.1,NM_179436.1,NM_116802.1,NM_126833.1,NM_147987.1,NM_103342.1,NM_105958.1,NM_202235.1,NM_126781.1,NM_122822.1,NM_113973.1,NM_179432.1,NM_122821.1,NM_103410.1,NM_126773.1,NM_147965.1, 505
361 24 NC_003070:13788236-13788342:-1	GTGATGATACTCGACCAGGGGGTCGAGTAACTTGGTAGAGTGAATGGCCGAGTGTGGTCAGGTGGTATGGCAAAGTGATACTCGACCAGGGGGTCGAGTGGCATCAT	TGATACTCGACCAGGGGGTCGAGTGG 0.695145 0	repeat_sense,igr_sense, NM_126793.1,NM_103358.1,NM_122817.1,NM_180584.1,NM_116794.1,NM_113972.1,NM_201705.1,NM_148798.1,NM_148247.1,NM_103339.1,NM_122890.1,NM_103391.1,NM_119847.2,NM_148526.1,NM_147956.1,NM_126888.1,NM_201713.1,NM_148782.1,NM_180576.1,NM_179436.1,NM_122815.1,NM_116802.1,NM_126833.1,NM_147987.1,NM_103342.1,NM_147971.1,NM_202235.1,NM_126781.1,NM_122822.1,NM_122889.1,NM_113973.1,NM_…
362 268 NC_003070:14061529-14061613:-1	TTACTCGGCCTGTTGGTAGAGTGATTGGTCGAGTGAATGATGATGGTGTTACTCGGCCATGTTGGTAGAGTGATAGGTCGAGTGA	TGTTGGTAGAGTGATAGGTC 0.0808072 0	repeat_sense,igr_sense, NM_126793.1,NM_201713.1,NM_179436.1,NM_202235.1, 70
363 24 NC_003070:14085332-14085438:-1	TGATGATACTCGACCAGGGGGTCGAGTAACTTGGTAGAGCGAATGGTCGAGTGATGGTGATGGTGTGGCGAAGTGATACTCGACCAGGGGGTCGAGTAGTGTCATCG	TACTCGACCAGGGGGTCGAGTAGTG 0.825876 0	repeat_sense,cds_antisense,exon_antisense, NM_122905.1,NM_126793.1,NM_103358.1,NM_122817.1,NM_180584.1,NM_116794.1,NM_113972.1,NM_201705.1,NM_148798.1,NM_148247.1,NM_103339.1,NM_122890.1,NM_119847.2,NM_103391.1,NM_148526.1,NM_147956.1,NM_126888.1,NM_201713.1,NM_148782.1,NM_180576.1,NM_179436.1,NM_122815.1,NM_116802.1,NM_126833.1,NM_147987.1,NM_103342.1,NM_147971.1,NM_202235.1,NM_126781.1,NM_12282…
364 24 NC_003070:14085333-14085437:-1	GATGATACTCGACCAGGGGGTCGAGTAACTTGGTAGAGCGAATGGTCGAGTGATGGTGATGGTGTGGCGAAGTGATACTCGACCAGGGGGTCGAGTAGTGTCATC	TACTCGACCAGGGGGTCGAGT 0.86202 0	repeat_sense,cds_antisense,exon_antisense, NM_126793.1,NM_103358.1,NM_122817.1,NM_180584.1,NM_116794.1,NM_113972.1,NM_201705.1,NM_148798.1,NM_148247.1,NM_103339.1,NM_122890.1,NM_119847.2,NM_103391.1,NM_148526.1,NM_147956.1,NM_126888.1,NM_201713.1,NM_148782.1,NM_180576.1,NM_179436.1,NM_122815.1,NM_116802.1,NM_126833.1,NM_147987.1,NM_103342.1,NM_147971.1,NM_202235.1,NM_126781.1,NM_122822.1,NM_12288…
365 38 NC_003070:14212853-14212950:-1	GATCGACACTAGAGGTGTATCGATCGACACCCTCGTGAGGAAGTGTTTTTGAAAATAATGTTCGATACGGTGTCGATCGACACTGGTTGGTGTCGGTC	GGTGTCGATCGACACTGGTT 0.316924 0	repeat_sense,igr_sense, NM_114016.1,NM_116818.1,NM_114110.1,NM_148529.1,NM_114074.1,NM_114079.1,NM_128028.1,NM_122848.1,NM_126918.1, 179
366 24 NC_003070:14229341-14229469:-1	ATGTAGACACTCGACCTCGGGGTCGAGTGGTGAGGTGAAGTGGTGGTGTCTTCTACTCGACCAGGGGGTCGAGTGGTCTGCTGAGGTTGTGAATCGTCTACTCGACCTGGGGGTCGAGTGGTTTTGCAT	ACTCGACCTGGGGGTCGAGT 0.276042 1	repeat_sense,igr_sense, NM_126793.1,NM_122830.1,NM_103358.1,NM_180584.1,NM_116794.1,NM_113972.1,NM_201705.1,NM_148798.1,NM_148247.1,NM_122819.1,NM_103339.1,NM_103391.1,NM_148526.1,NM_147956.1,NM_126888.1,NM_201713.1,NM_148782.1,NM_179436.1,NM_116802.1,NM_126833.1,NM_147987.1,NM_103342.1,NM_202235.1,NM_126781.1,NM_122822.1,NM_113973.1,NM_179432.1,NM_122821.1,NM_126773.1,NM_147965.1, 1064
367 24 NC_003070:14249189-14249374:-1	GTGAAGACACTCGACCTCGGGGTCGAGTGATCTGATCGAGTGATGGTCAGGTGGTGGGGATGAAGACACTCGACCTCGGGGTCGAGTGGTGAGGTGAAGTGGTGGTGTCCTCTACTCGACCAGGGGGTCGAGTGGTCTGCTGAGGTTGTGAATCGTCTACTCGACCTGGAGGTCGAGTGGTTTTGC	ACTCGACCTGGAGGTCGAGT 0.261259 1	repeat_sense,igr_sense, NM_126793.1,NM_122830.1,NM_103358.1,NM_180584.1,NM_116794.1,NM_113972.1,NM_201705.1,NM_148798.1,NM_148247.1,NM_122819.1,NM_103339.1,NM_122890.1,NM_103391.1,NM_126651.1,NM_148526.1,NM_147956.1,NM_126888.1,NM_201713.1,NM_148782.1,NM_180576.1,NM_179436.1,NM_116802.1,NM_126833.1,NM_147987.1,NM_103342.1,NM_147971.1,NM_202235.1,NM_126781.1,NM_122822.1,NM_122889.1,NM_103143.2,NM_…
368 24 NC_003070:14317767-14318000:-1	GTGAAGACACTCGGCCTCGGGGTCGAGTGATGTGGTCGAGTGATTGTCAGGTGGTGGAGATGAAGACATTCGACCTCGGGGTCGAGTGATGTGGTCGAGTGTCTCTCCTGATGGTACTCGGCCAGGCGGTCGAGTGGTGAGGTGAAGTGGTGCTGTCTTCTACTCGACCTGGTGGTCGAATGGTCTGTTGAGGTCTTGAAGCTTCTACTCGACCTCAGGGTCGAGTGGTTTGAC	TCTACTCGACCTCAGGGTCGAGTG 0.156552 1	repeat_sense,igr_sense, NM_122820.1,NM_126793.1,NM_103358.1,NM_180584.1,NM_116794.1,NM_113972.1,NM_148798.1,NM_148247.1,NM_122819.1,NM_103339.1,NM_122890.1,NM_103391.1,NM_148526.1,NM_147956.1,NM_114067.1,NM_126888.1,NM_148782.1,NM_180576.1,NM_179436.1,NM_116802.1,NM_126833.1,NM_147987.1,NM_103342.1,NM_147971.1,NM_123689.1,NM_202235.1,NM_126781.1,NM_122889.1,NM_113973.1,NM_179432.1,NM_147959.1,NM_…
369 24 NC_003070:14342281-14342465:-1	GTGAAGACACTCGGCCTCGGGGTCGAGTGATGTGATCGAGTGATGGTCAGGTGATGGGATGAAGACACTCGACCTCGGAGTCGAGTGATGTGGTCAAGTAGTGATGTCCTCTACTCGACCAGGGGGTCGAGTGATCTGTTGAGATCTTGAAGCTCCTACTCGACCTCGGGGTCGAGTGGTTTGAC	CTACTCGACCTCGGGGTCGAGTGG 0.182773 1	repeat_sense,igr_sense, NM_122820.1,NM_126793.1,NM_103358.1,NM_180584.1,NM_116794.1,NM_113972.1,NM_201705.1,NM_148798.1,NM_148247.1,NM_122819.1,NM_103339.1,NM_122890.1,NM_103391.1,NM_148526.1,NM_147956.1,NM_114067.1,NM_126888.1,NM_148782.1,NM_180576.1,NM_201718.1,NM_179436.1,NM_116802.1,NM_126833.1,NM_147987.1,NM_103342.1,NM_147971.1,NM_202235.1,NM_126781.1,NM_122822.1,NM_122889.1,NM_113973.1,NM_…
370 24 NC_003070:14434865-14435098:-1	GTGAAGACACTCGGCCTCGGGGTCGAGTGATGTGGTCGAGTGATTGTCAGGTGGTGGAGGTGAAGACACTCGACCTCGGGGTCGAGTGATGTGGTCGAGTGTCTCTCCTGATGGTACTCGGCCAGGCGGTCGAGTGGTGAGGTGAAGTGGTGATGTCTTCTACTCGACCTGGTGGTCGAATGGTCTGTTGAGGTCTTGAAGCTTCTACTCGACCTCAGGGTCGAGTGGTTTGAC	TACTCGACCTCAGGGTCGAGTGGT 0.219736 1	repeat_sense,igr_sense, NM_122820.1,NM_126793.1,NM_103358.1,NM_180584.1,NM_116794.1,NM_113972.1,NM_148798.1,NM_148247.1,NM_122819.1,NM_103339.1,NM_122890.1,NM_103391.1,NM_148526.1,NM_147956.1,NM_114067.1,NM_126888.1,NM_148782.1,NM_180576.1,NM_179436.1,NM_116802.1,NM_126833.1,NM_147987.1,NM_103342.1,NM_147971.1,NM_123689.1,NM_202235.1,NM_126781.1,NM_122889.1,NM_113973.1,NM_179432.1,NM_147959.1,NM_…
371 86 NC_003070:14443748-14443860:-1	GAGGTGAAGTGGTGATGTCTTCTACTCGACTTGGTGGTCGAGTGGTCTGTTGAGGTCTTGAAGCTTCTACTCGACCTCAGGGTCGAGTGGTTTGGCATGATCAGGTCCGCTTC	GGTCGAGTGGTTTGGCATGATCA 0.227384 0	repeat_sense,igr_sense, NM_148265.1,NM_113972.1,NM_103391.1,NM_126888.1,NM_102530.2,NM_147987.1,NM_202235.1,NM_113973.1,NM_127570.2,NM_147965.1, 179
372 24 NC_003070:14443765-14444011:-1	GTGAAGATACTCGGCCTCGGGGTCGAGTGATGTGGTCGAGTGATGTGGTCGAGTGATTATCAGGTGGTGGAGGTGAAGACACTCGACCTCGGGGTCGAGTGATGTGGTCGAGTGGCTCTCCTGATGGTACTCGGCTAGGCAGTCGAGTGGTGAGGTGAAGTGGTGATGTCTTCTACTCGACTTGGTGGTCGAGTGGTCTGTTGAGGTCTTGAAGCTTCTACTCGACCTCAGGGTCGAGTGGTTTGGC	TACTCGACCTCAGGGTCGAGTGGT 0.447035 1	repeat_sense,igr_sense, NM_122820.1,NM_126793.1,NM_103358.1,NM_180584.1,NM_116794.1,NM_113972.1,NM_148798.1,NM_148247.1,NM_122819.1,NM_103339.1,NM_122890.1,NM_103391.1,NM_148526.1,NM_147956.1,NM_114067.1,NM_126888.1,NM_148782.1,NM_180576.1,NM_179436.1,NM_116802.1,NM_126833.1,NM_147987.1,NM_103342.1,NM_147971.1,NM_123689.1,NM_202235.1,NM_126781.1,NM_122889.1,NM_113973.1,NM_179432.1,NM_147959.1,NM_…
373 24 NC_003070:14443903-14444071:-1	GATGGTGATACTCGACTTCCAGGTAGAGTGGTGTGATCGAGTGGTGATCTGGTAATGGAGGTGAAGATACTCGGCCTCGGGGTCGAGTGATGTGGTCGAGTGATGTGGTCGAGTGATTATCAGGTGGTGGAGGTGAAGACACTCGACCTCGGGGTCGAGTGATGTGGTC	AAGACACTCGACCTCGGGGTCGAGTG 0.238142 1	repeat_sense,igr_sense, NM_122820.1,NM_118048.1,NM_122997.1,NM_126793.1,NM_103358.1,NM_113671.2,NM_180584.1,NM_116794.1,NM_113972.1,NM_201705.1,NM_148798.1,NM_148247.1,NM_122819.1,NM_103339.1,NM_122890.1,NM_103391.1,NM_148526.1,NM_147956.1,NM_114067.1,NM_126888.1,NM_148782.1,NM_180576.1,NM_201718.1,NM_179436.1,NM_116802.1,NM_126833.1,NM_147987.1,NM_103342.1,NM_147971.1,NM_103206.1,NM_202235.1,NM_…
374 24 NC_003070:14452350-14452534:-1	GTGAAGACACTCGGCCTCGGGGTCGAGTGATGTGATCGAGTGATGGTTAGGTGATGGGATGAAGACACATGAGCTCGAGGTCAAGTGATGTGGTCAAGTAGTGATGTCCTCTACTCGACCAGGGGGTCGAGTGATCTGTTGAGATCTTGAAGCTCCTACTCGACCTCGGGGTCGAGTGGTTTGAC	CTACTCGACCTCGGGGTCGAGTGGT 0.626479 1	repeat_sense,igr_sense, NM_122820.1,NM_126793.1,NM_103358.1,NM_180584.1,NM_116794.1,NM_113972.1,NM_201705.1,NM_148798.1,NM_148247.1,NM_122819.1,NM_103339.1,NM_122890.1,NM_103391.1,NM_148526.1,NM_147956.1,NM_114067.1,NM_126888.1,NM_148782.1,NM_180576.1,NM_201718.1,NM_179436.1,NM_116802.1,NM_126833.1,NM_147987.1,NM_103342.1,NM_147971.1,NM_202235.1,NM_126781.1,NM_122822.1,NM_122889.1,NM_113973.1,NM_…
375 24 NC_003070:14492525-14492665:-1	TACTCGACCAGAGGGTCGAGTAAATTGGTAGAGTGAATGGTCGAGTGATGGTGATGGTGGCGCGAAGTGATACTCGACCAGGGGGTCGAGTAGTGTCATCGAGTAGCCTTAGCTGAGGGTACTCGACCAGGTGGTCGAGTA	GTACTCGACCAGGTGGTCGA 0.405174 0	repeat_sense,igr_sense, NM_126793.1,NM_103358.1,NM_180584.1,NM_116794.1,NM_113972.1,NM_201705.1,NM_148798.1,NM_148247.1,NM_103339.1,NM_103391.1,NM_148526.1,NM_147956.1,NM_126888.1,NM_201713.1,NM_123420.1,NM_179436.1,NM_116802.1,NM_126833.1,NM_147987.1,NM_103342.1,NM_202235.1,NM_126781.1,NM_122828.1,NM_113973.1,NM_179432.1,NM_126773.1,NM_147965.1, 561
376 24 NC_003070:14492565-14492671:-1	TGATGATACTCGACCAGAGGGTCGAGTAAATTGGTAGAGTGAATGGTCGAGTGATGGTGATGGTGGCGCGAAGTGATACTCGACCAGGGGGTCGAGTAGTGTCATCG	TACTCGACCAGGGGGTCGAGTAGT 0.638808 0	repeat_sense,igr_sense, NM_122905.1,NM_126793.1,NM_103358.1,NM_122817.1,NM_180584.1,NM_116794.1,NM_113972.1,NM_201705.1,NM_148798.1,NM_148247.1,NM_103339.1,NM_122890.1,NM_119847.2,NM_103391.1,NM_148526.1,NM_147956.1,NM_126888.1,NM_201713.1,NM_148782.1,NM_180576.1,NM_179436.1,NM_122815.1,NM_116802.1,NM_126833.1,NM_147987.1,NM_103342.1,NM_147971.1,NM_202235.1,NM_126781.1,NM_122822.1,NM_122889.1,NM_…
377 24 NC_003070:14926580-14926648:-1	CTACTCGACCTGGGGGTCGAGTGGTCTCTTGAGATCTGGAAGATCCTACTCGACTTTGGGGTCGAGTGG	TACTCGACTTTGGGGTCGAGT 0.244252 0	repeat_sense,igr_sense, NM_125185.2,NM_126793.1,NM_103358.1,NM_180584.1,NM_116794.1,NM_201705.1,NM_148798.1,NM_148247.1,NM_123224.2,NM_103339.1,NM_103391.1,NM_113202.1,NM_148526.1,NM_147956.1,NM_126888.1,NM_201713.1,NM_179436.1,NM_116802.1,NM_126833.1,NM_147987.1,NM_103342.1,NM_202235.1,NM_126781.1,NM_122822.1,NM_113973.1,NM_179432.1,NM_122821.1,NM_126773.1,NM_147965.1, 335
378 24 NC_003070:14926619-14926748:-1	AAGTGAAGACACTCGACCTCGTGGTCGAGTGATGGTCAAGTGATGGGGATGAAGACACTCGACCTCGTGGTCGAGTGATGTGATGAAATCGAGAAGCCCTCTACTCGACCTGGGGGTCGAGTGGTCTCTT	CTACTCGACCTGGGGGTCGAGTGGT 0.532115 1	repeat_sense,igr_sense, NM_126793.1,NM_122830.1,NM_103358.1,NM_180584.1,NM_116794.1,NM_113972.1,NM_201705.1,NM_148798.1,NM_148247.1,NM_122819.1,NM_103339.1,NM_103391.1,NM_148526.1,NM_147956.1,NM_126888.1,NM_201713.1,NM_148782.1,NM_179436.1,NM_116802.1,NM_126833.1,NM_147987.1,NM_103342.1,NM_202235.1,NM_126781.1,NM_122822.1,NM_113973.1,NM_179432.1,NM_122821.1,NM_120741.2,NM_126773.1,NM_147965.1, 11…
379 24 NC_003070:15181732-15181828:-1	GGTGAAGGCACTCGACCTCGTGGTCGAGTGAAGTGATCGAGTGACGGTCTGGTGATGGAGATGATGGCACTCGCCCTCGTGGTCGAGTGAAGTGATC	GGCACTCGCCCTCGTGGTCGAGTGA 0.173251 0	repeat_sense,cds_antisense,exon_antisense, NM_122820.1,NM_103358.1,NM_180584.1,NM_116794.1,NM_113972.1,NM_201705.1,NM_148798.1,NM_148247.1,NM_103339.1,NM_103391.1,NM_148526.1,NM_147956.1,NM_114067.1,NM_126888.1,NM_179436.1,NM_116802.1,NM_126833.1,NM_147987.1,NM_103342.1,NM_202235.1,NM_126781.1,NM_113973.1,NM_179432.1,NM_180578.1,NM_126773.1,NM_147965.1, 358
380 64 NC_003070:15291242-15291324:-1	GAGACCGGGTCGAGGAACCATTTTGAGTTGATGCTCCGAGGCGTTCTCGATGTCACCTCGGGATGGTTCCTCGATGTGATCTT	CTCGGGATGGTTCCTCGATG 0.243197 0	repeat_sense,igr_sense, NM_122697.1,NM_102931.1,NM_114167.1, 15
381 64 NC_003070:15389346-15389428:-1	GAGACCGGGTCGAGGAACCATTTTGAGTTGATGCTCCGAGGCGTTCTCGATGTCACCTCGGGATGGTTCCTCGATGTGATCTT	CTCGGGATGGTTCCTCGATG 0.243197 0	repeat_sense,igr_sense, NM_122697.1,NM_102931.1,NM_114167.1, 15
382 24 NC_003070:15424724-15424864:-1	GTGAAGACACTCGACCTCGGGGTCGAGTGATGTGATCGAGTGATGGTCAGGTGATGGAGATGAGGACACTCGACCTCGTGGACGAGTGGTGAGGTGAAGTGGTGATGTCTTCTACTCGACCTCGGGGTCGAGTGGTTTGAC	TACTCGACCTCGGGGTCGAGTGGT 0.912882 1	repeat_sense,igr_sense, NM_122820.1,NM_126793.1,NM_103358.1,NM_180584.1,NM_116794.1,NM_113972.1,NM_201705.1,NM_148798.1,NM_148247.1,NM_122819.1,NM_103339.1,NM_122890.1,NM_103391.1,NM_148526.1,NM_147956.1,NM_114067.1,NM_126888.1,NM_148782.1,NM_180576.1,NM_201718.1,NM_179436.1,NM_116802.1,NM_126833.1,NM_147987.1,NM_103342.1,NM_147971.1,NM_202235.1,NM_126781.1,NM_122822.1,NM_122889.1,NM_113973.1,NM_…
383 24 NC_003070:15465176-15465248:-1	ATACTCGACCAGGGGGTCGAGTAGTGTCATCGAGTGGCCTGAGCTGAGGTTACTCGACCTGGGGGTCGAGTAT	GTTACTCGACCTGGGGGTCGAGT 0.851483 0	repeat_sense,igr_sense, NM_126793.1,NM_122830.1,NM_103358.1,NM_180584.1,NM_116794.1,NM_113972.1,NM_201705.1,NM_148798.1,NM_148247.1,NM_122819.1,NM_103339.1,NM_103391.1,NM_148526.1,NM_147956.1,NM_126888.1,NM_201713.1,NM_148782.1,NM_179436.1,NM_116802.1,NM_126833.1,NM_147987.1,NM_103342.1,NM_202235.1,NM_126781.1,NM_122822.1,NM_113973.1,NM_179432.1,NM_122821.1,NM_126773.1,NM_147965.1, 1080
384 24 NC_003070:15472115-15472187:-1	ATACTCGACCAGGGGGTCGAGTAGTGTCATCGAGTGGCCTGAGCTGAGGTTACTCGACCTGGGGGTCGAGTAT	GTTACTCGACCTGGGGGTCGAGT 0.851483 0	repeat_sense,igr_sense, NM_126793.1,NM_122830.1,NM_103358.1,NM_180584.1,NM_116794.1,NM_113972.1,NM_201705.1,NM_148798.1,NM_148247.1,NM_122819.1,NM_103339.1,NM_103391.1,NM_148526.1,NM_147956.1,NM_126888.1,NM_201713.1,NM_148782.1,NM_179436.1,NM_116802.1,NM_126833.1,NM_147987.1,NM_103342.1,NM_202235.1,NM_126781.1,NM_122822.1,NM_113973.1,NM_179432.1,NM_122821.1,NM_126773.1,NM_147965.1, 1080
385 24 NC_003070:15479055-15479127:-1	ATACTCGACCAGGGGGTCGAGTAGTGTCATCGAGTGGCCTGAGCTGAGGTTACTCGACCTGGGGGTCGAGTAT	GTTACTCGACCTGGGGGTCGAGT 0.851483 0	repeat_sense,cds_antisense,exon_antisense, NM_126793.1,NM_122830.1,NM_103358.1,NM_180584.1,NM_116794.1,NM_113972.1,NM_201705.1,NM_148798.1,NM_148247.1,NM_122819.1,NM_103339.1,NM_103391.1,NM_148526.1,NM_147956.1,NM_126888.1,NM_201713.1,NM_148782.1,NM_179436.1,NM_116802.1,NM_126833.1,NM_147987.1,NM_103342.1,NM_202235.1,NM_126781.1,NM_122822.1,NM_113973.1,NM_179432.1,NM_122821.1,NM_126773.1,NM_14796…
386 24 NC_003070:15505897-15505985:-1	ATGGGATGAAGACACTCGACCTCGGGGTCGAGTGATGTGGTGAAGTAGTGATGTCCTCTACTCGACCGCGGGGTCGAGTGGTTTAACAT	TACTCGACCGCGGGGTCGAGTG 0.170144 0	repeat_sense,igr_sense, NM_122820.1,NM_126793.1,NM_103358.1,NM_180584.1,NM_116794.1,NM_113972.1,NM_201705.1,NM_148798.1,NM_148247.1,NM_122819.1,NM_103339.1,NM_122890.1,NM_103391.1,NM_148526.1,NM_147956.1,NM_114067.1,NM_126888.1,NM_148782.1,NM_180576.1,NM_179436.1,NM_116802.1,NM_126833.1,NM_147987.1,NM_103342.1,NM_147971.1,NM_202235.1,NM_126781.1,NM_122822.1,NM_122889.1,NM_113973.1,NM_179432.1,NM_…
387 24 NC_003070:15548327-15548401:-1	AGACCACTCGACCCCCTGGTCGAGTAGAGGACATCACCACTTCACCTCACCACTCGACCCCGAGGTCGAGTGTCT	ACTCGACCCCGAGGTCGAGTGT 0.349944 0	repeat_sense,igr_sense, NM_122820.1,NM_126793.1,NM_130345.2,NM_103358.1,NM_180584.1,NM_116794.1,NM_113972.1,NM_201705.1,NM_148798.1,NM_148247.1,NM_122819.1,NM_103339.1,NM_122890.1,NM_103391.1,NM_126651.1,NM_148526.1,NM_147956.1,NM_114067.1,NM_126888.1,NM_148782.1,NM_180576.1,NM_179436.1,NM_100205.3,NM_116802.1,NM_114441.1,NM_126833.1,NM_147987.1,NM_114100.1,NM_103342.1,NM_147971.1,NM_202235.1,NM_…
388 38 NC_003070:15593934-15594041:-1	AGGCTGGACTGGGTTGGTGTCGATCGACACACAATTGATGTAGGTTGACACTGTCGGGTTCTATAGTGTCTGTGTTGGCTGGTGTCGATCGACACTGGTGTCTAGTCT	GTGTCGATCGACACTGGTGTCT 0.0913266 0	igr_sense, NM_114016.1,NM_126950.1,NM_147252.1,NM_148529.1,NM_122848.1,NM_126918.1, 149
389 38 NC_003070:15593934-15594041:-1	AGGCTGGACTGGGTTGGTGTCGATCGACACACAATTGATGTAGGTTGACACTGTCGGGTTCTATAGTGTCTGTGTTGGCTGGTGTCGATCGACACTGGTGTCTAGTCT	CTGGTGTCGATCGACACTGG 0.0145143 0	repeat_sense,igr_sense, NM_114016.1,NM_116818.1,NM_147252.1,NM_114110.1,NM_114074.1,NM_114079.1,NM_126918.1, 176
390 24 NC_003070:15640594-15640789:-1	ATGATACTCGACAAGGGGGTCGAGTAATGTGGTAGAGTGAATGGTCAAGTGGTTGTCAAGTGGTGTGACAAAGTGTTGCTTGCCGATGCGGTCGAGTGGTGTCATCGAGTAACCTGGAGTGTGGTTACTCGACCATGGGGTCGAGTGATTGGCAAGAACGGCTCCAATGTTACTCGACCAAGGGGTCGAGTGTGGT	TACTCGACCAAGGGGTCGAGTGTG 0.392532 0	repeat_sense,cds_antisense,exon_antisense, NM_126793.1,NM_103358.1,NM_180584.1,NM_116794.1,NM_113972.1,NM_201705.1,NM_148798.1,NM_148247.1,NM_122819.1,NM_103339.1,NM_122890.1,NM_103391.1,NM_148526.1,NM_147956.1,NM_126888.1,NM_201713.1,NM_148782.1,NM_180576.1,NM_123420.1,NM_179436.1,NM_116802.1,NM_126833.1,NM_147987.1,NM_103342.1,NM_147971.1,NM_147993.1,NM_202235.1,NM_126781.1,NM_122822.1,NM_12288…
391 269 NC_003070:16148090-16148177:-1	TCCATTTAATTATAGTCAACTTTTGGACAACCCCAAAACTGAAGGGTTTATTTTGGGCTTGTCCAAAAGCTGACTATAATTAAATGGA	CTTGTCCAAAAGCTGACTATA 0.0819129 1	igr_sense, NM_123363.1,NM_128973.1,NM_127442.2,NM_105791.3,NM_113777.1,NM_127776.2,NM_117011.1,NM_124336.1,NM_122240.2, 8
392 270 NC_003070:16267880-16267990:-1	TCTAGAAGGGATGGGATTGATTGATCCCAAAGAGTGGATCGATTAACTAAGTGTCACGACGTCGAAGATTGTTTTTCAAACACCTTGGGGTCAAGCGGTCCACCTACTAGA	CTTGGGGTCAAGCGGTCCAC 0.0753259 0	igr_sense, NM_125115.3, 2
393 271 NC_003070:16455241-16455409:-1	GTGTTAATGAGAGAAAGTCTCACATCAAAAGTTGGAGAAATTATCAATATAAAGGGTTAATGCCAATCCACTTATTGCCAATTAGTTTTGAGTTGGATTGACCCTAAACCTTTATGTATCACTCGATAATTTTTCTAACTTTCGGTGTGGGAATTTCTCTCATTAATAT	TGTGGGAATTTCTCTCATTA 0.210823 1	repeat_sense,igr_sense, NM_105571.2,NM_114865.3, 6
394 272 NC_003070:16469031-16469168:-1	CAAGCCAGCGGTGTTACTATTGGAAACCCTACAAAATTTGTAAACAATATTTTTTTGGCTTTTCTAGATTTTTCTCAATCGCCATTGTTCTGATGAGAATGCCAAAAGTAGGTTTCCGATAGTAACACCGCTGGTTTG	CCGATAGTAACACCGCTGGT 1.14863 0	igr_sense, NM_105326.1,NM_105327.1,NM_105331.1, 2
395 110 NC_003070:17372029-17372184:-1	AAGTTGTTCGTTTGCCTGTCGCTGGTTCAACGACCAAAAGTAGCGACCAGCGACCGCAATTTTTGATCGCTGAAATTTTTAGCGATCAGTCGCTGGTTTCAGCGATTAGTCGCTGCTTTTGGTCGCTGAATCCAGCGACATGCAAACGAACAACTT	TCCAGCGACATGCAAACGAACAA 0.0279764 1	igr_sense, NM_100444.1,NM_122608.1,NM_202257.1,NM_128095.2, 73
396 154 NC_003070:17372035-17372178:-1	TTCGTTTGCCTGTCGCTGGTTCAACGACCAAAAGTAGCGACCAGCGACCGCAATTTTTGATCGCTGAAATTTTTAGCGATCAGTCGCTGGTTTCAGCGATTAGTCGCTGCTTTTGGTCGCTGAATCCAGCGACATGCAAACGAA	TTGGTCGCTGAATCCAGCGACA 0.0667503 1	igr_sense, NM_117911.2,NM_179071.1,NM_202257.1,NM_128095.2, 55
397 92 NC_003070:17372046-17372167:-1	GTCGCTGGTTCAACGACCAAAAGTAGCGACCAGCGACCGCAATTTTTGATCGCTGAAATTTTTAGCGATCAGTCGCTGGTTTCAGCGATTAGTCGCTGCTTTTGGTCGCTGAATCCAGCGAC	GTCGCTGCTTTTGGTCGCTGAA 0.480343 1	igr_sense, NM_117673.3,NM_127408.1,NM_202257.1,NM_128095.2, 23
398 273 NC_003070:18098496-18098592:-1	GGCATCGGTGCTTTGGGGAATCCATTCTTCTTCACCACGTATTCATAGTCCTGTATAATATCACAAAAATAGGATGGATTCCCAAAGCACCGATGCC	TGGATTCCCAAAGCACCGAT 1.40146 0	igr_sense, NM_116435.1,NM_202956.1,NM_105520.2,NM_127232.2,NM_119674.3, 5
399 274 ath-MIR406 NC_003070:19433747-19433946:-1	TAAAGTCTTAATTTTTAGTTATCACGATTTAGCACATATCAATCTATAGATTTGATTTTTCTTTTATTAGTTCTTAAATTTTGATTTGAGACAGTAACTATTCAAATAGAATGCTATTGTAATCCAGAATCCGAAAGAAACGAATCAAAAAAAAAAAAAACGAGTCTTCATAGTAAAAATCGATTAACTAAAAAGGATGG	TAGAATGCTATTGTAATCCAG 0	igr_sense, NM_115355.2,NM_100245.1,NM_120155.3, 3
400 275 NC_003070:19580756-19580825:-1	GTCGTATCTGTGACATCTACTGTCTCTTGAACTATTGTGTTCAAGGGACAGTAGATGTCACAGGTTCGAT	GGGACAGTAGATGTCACAGG 0.628383 1	igr_sense, NM_104202.2,NM_121003.2, 4
401 276 NC_003070:20594423-20594502:-1	AGTAAAAGGAAAGACTTGGAGGAGTATAGTGGAACCTTAAGAGCGTTATCACGAAATGCTCCTCCTGTTTCACCTCCTCT	AATGCTCCTCCTGTTTCACCT 0.0233833 0	exon_sense,cds_sense, NM_119871.2,NM_129632.1,NM_148048.2,NM_130372.1,NM_180405.1,NM_129277.2,NM_128409.2,NM_102355.3,NM_125438.2,NM_115205.1,NM_128005.2,NM_116273.3,NM_104029.2,NM_116077.2,NM_202969.1,NM_100730.2, 3
402 277 NC_003070:20985471-20985624:-1	AATGCTGATTTAGTCATGATTGACTAAGACAATGATGAGTGTACCAAAGTAACATCTAAATTCTAGAACTAAGAATCAGAAACTTAAACCATATACAAACAAAATGACCTTTTTCAAGATCATTGTCTTGGTCAATCATGACTAAATCAGCATT	TTGTCTTGGTCAATCATGACTA 0.298694 1	intron_sense, NM_123078.1,NM_100718.2,NM_111200.3,NM_116320.1,NM_126241.1,NM_106132.2,NM_202064.1,NM_112505.2,NM_116282.1,NM_124273.3, 11
403 278 NC_003070:20985992-20986080:-1	TGGTAAGTGATAATCATTACCACCCAAGCTAACATTCAAACCAAAAACCAGTTTAAGTTAACTTGGGTGGTGCTGATTATCACTTGTCG	ACTTGGGTGGTGCTGATTAT 0.563237 1	intron_sense, NM_122306.2, 4
404 279 NC_003070:22580777-22580885:-1	TAAGTGGGATGACGGATCTGACCATGATGGTGTTTCGATCCCTGGACAATAACTACATCATACATAAATTTCTGCAACACCATCATGGTCGGATTCATCATCCCGCTTA	TCATGGTCGGATTCATCATCCC 1.3245 1	igr_sense, NM_123215.1,NM_179735.1,NM_101483.1,NM_123975.1,NM_117300.2,NM_112514.2,NM_101263.3,NM_123216.2,NM_202008.1,NM_128126.3,NM_128157.3,NM_104703.1,NM_111606.1,NM_111277.1,NM_100082.3,NM_121956.2,NM_179778.1,NM_122735.1,NM_104094.1,NM_119494.3,NM_104087.1,NM_118639.2,NM_104554.2,NM_179234.1,NM_201908.1,NM_123971.1,NM_180264.1,NM_121249.2,NM_117302.2,NM_104704.1,NM_128790.2,NM_101201.1,NM_1…
405 82 ath-MIR171c NC_003070:22933754-22933869:-1	TGAGCGCACTATCGGACATCAAATACGAGATATTGGTGCGGTTCAATCAGAAAACCGTACTCTTTTGTTTTAAAGATCGGTTTATTTGATTGAGCCGTGCCAATATCACGCGTTTA	TTGAGCCGTGCCAATATCACG 0	igr_sense, NM_130079.2,NM_122231.2,NM_125541.1,NM_115927.4,NM_116232.4, 7
406 280 NC_003070:22951987-22952151:-1	CTGACCTTGTTCAGGAGCTGCATTGCACACAAGGTTTCTTGACTGTCTCTATACGTCTTGAGTTTGGATCATGTATTGTCTTATTTCTGTATCATGGTTTTTTGAACTGCAGATATGGATTGAAATTTGGAATGATGCAATGCAGCTCCTGAGCTCTTGGATTGG	ATGCAATGCAGCTCCTGAGCT 1.16517 1	igr_sense, NM_114539.2,NM_127974.1,NM_106062.2,NM_180723.1,NM_121912.2,NM_112208.3,NM_122128.2,NM_116509.1,NM_114532.1, 5
407 22 NC_003070:23097480-23097562:-1	AAACATGTGGGAGGACTCCAAGTGTGGTTCACATCGAGATAATACCGAGGATATAACCACACTTGGAGTCCTCCCACATGTTT	ACACTTGGAGTCCTCCCACA 0.929734 0	cds_antisense,exon_antisense, NM_103695.1,NM_117515.1,NM_148068.1,NM_104921.1,NM_129220.2, 7
408 281 NC_003070:23349044-23349174:-1	ACTAGTTTTAGGGCGCCTCTCCATTGGCAGGTCCTTTACTTCCAAATATACACATACATATATGAATATCGAAAATTTCCGATGATCGATTTATAAATGACCTGCCAAAGGAGAGTTGCCCTGAAACTGGT	AGGAGAGTTGCCCTGAAACT 0.63226 0	igr_sense, NM_122638.2, 3
409 66 ath-MIR399b NC_003070:23349044-23349174:-1	ACTAGTTTTAGGGCGCCTCTCCATTGGCAGGTCCTTTACTTCCAAATATACACATACATATATGAATATCGAAAATTTCCGATGATCGATTTATAAATGACCTGCCAAAGGAGAGTTGCCCTGAAACTGGT	TGCCAAAGGAGAGTTGCCCTG 0.828815 1	igr_sense, HASH(0xcc4de60) NM_116234.2,NM_113146.1,NM_179887.1,NM_111526.3,NM_115327.2, 9
410 282 NC_003070:23349047-23349171:-1	AGTTTTAGGGCGCCTCTCCATTGGCAGGTCCTTTACTTCCAAATATACACATACATATATGAATATCGAAAATTTCCGATGATCGATTTATAAATGACCTGCCAAAGGAGAGTTGCCCTGAAACT	TGACCTGCCAAAGGAGAGTTG 1.19342 1	igr_sense, NM_104533.3,NM_127993.2,NM_179887.1,NM_111526.3,NM_128661.2, 4
411 283 NC_003070:25617092-25617267:-1	GTTGATCCGGCCAAATCGACTCACCGTTAACACTTCTTAACAGCTCTCCTAACAGCGTAACTAACAACTGTTTTCGTCCTTAAACCAACGATAACGATTGTTAGGCCACGTTTTGTAACGGCTGTTAGGAGCGCTGTTAAGGAGTGTTAATGGTGAATCGATTTGGCCGGGTCAAC	TGAATCGATTTGGCCGGGTC 0.0420547 1	repeat_sense,igr_sense, NM_117003.2, 16
412 68 ath-MIR395d NC_003070:26273642-26273741:-1	ATGTCCTCTAGAGTTCTCCTGAACACTTCATTGGAAATTTGTTATTCAGTAAGCTAACAGTTAATTCCACTGAAGTGTTTGGGGGAACTCCCGATGTCAT	CTGAAGTGTTTGGGGGAACTC 1	igr_sense, HASH(0xcc603c8) NM_117550.2,NM_113189.2,NM_111756.2,NM_127695.1,NM_201773.1,NM_128437.2,NM_123745.3,NM_121056.2,NM_118515.3, 15
413 68 ath-MIR395e NC_003070:26276444-26276527:-1	TCTAGAGTTCCTCTGAGCACTTCATTGGAGATACAATTTTTTATAAAATAGTTTTCTACTGAAGTGTTTGGGGGAACTCCCGGG	CTGAAGTGTTTGGGGGAACTC 1	igr_sense, HASH(0xcc6a89c) NM_117550.2,NM_113189.2,NM_111756.2,NM_127695.1,NM_201773.1,NM_128437.2,NM_123745.3,NM_121056.2,NM_118515.3, 15
414 284 NC_003070:26367427-26367548:-1	CGATTCCACCGTCGCGGAAGATGGCTGATTTGAATCTTAACAAGAAAAAAACTCCAGCGACAACGGAGATGTTTCCGCTGTCGCTGAATTTGCAGAGGCCGTCTTCGTCGACATCGTCATCG	GGCCGTCTTCGTCGACATCGT 0.0940622 1	exon_sense,cds_sense, NM_122216.2,NM_103851.3,NM_126705.3,NM_180630.1,NM_127833.3,NM_105842.2,NM_116349.1,NM_112342.1,NM_180631.1,NM_117944.3,NM_103538.1,NM_129018.2,NM_124361.3,NM_120183.1, 3
415 285 NC_003070:26921281-26921353:-1	GAGGTGGGGGAAGAAGACGATCTTCGATCCAGAGTTGAGCTTCTCTTCTGCCATCGTCTTCTTCCTCGATCTC	CATCGTCTTCTTCCTCGATC 0.135178 0	utr_sense,exon_sense, NM_127202.1,NM_122656.3,NM_124978.2,NM_117875.2,NM_100153.2,NM_124563.2,NM_100932.2,NM_123487.2,NM_102019.3,NM_123489.3,NM_180319.1,NM_115710.1,NM_129547.2,NM_103853.3,NM_114459.3,NM_114280.2,NM_125922.1,NM_129719.2,NM_120634.2,NM_111833.3,NM_121534.1,NM_128884.2,NM_114871.2,NM_104531.1,NM_103852.1,NM_128881.2,NM_126553.2,NM_106461.2,NM_106327.1,NM_120447.2,NM_116595.1,NM_10…
416 126 ath-MIR159a NC_003070:27716890-27717081:-1	GGAAGTAGAGCTCCTTAAAGTTCAAACATGAGTTGAGCAGGGTAAAGAAAAGCTGCTAAGCTATGGATCCCATAAGCCCTAATCCTTGTAAAGTAAAAAAGGATTTGGTTATATGGATTGCATATCTCAGGAGCTTTAACTTGCCCTTTAATGGCTTTTACTCTTCTTTGGATTGAAGGGAGCTCTACATCT	TCTTTGGATTGAAGGGAGCTCTA 0.145442 1	igr_sense, HASH(0xccb3724) NM_111977.3,NM_124884.1,NM_120484.2,NM_148731.1,NM_128253.1,NM_180448.1,NM_128805.3,NM_128252.1,NM_120692.2,NM_124975.3,NM_102642.1,NM_100549.2,NM_115910.1,NM_118867.1, 21
417 286 NC_003070:29396913-29396984:-1	ACTACCGTGTCCTCCTCCACCGCCGCCGGAGAGTTTACTGAGCTGGCGACGGTGGTGAGGACGACGGTTAGT	TGGCGACGGTGGTGAGGACG 0.185907 0	cds_antisense,exon_antisense, NM_122228.2,NM_130150.2,NM_106461.2,NM_100827.2,NM_121525.2,NM_105528.3,NM_118753.2,NM_116341.1,NM_121237.1, 4
418 98 NC_003071:713486-713617:-1	ACCGTTAACACTTCTTAATAGCGCTCCTAACAGCCATTACAAAACATGGCCTAACAGCCGTTGTCGTTGGTTTAAGGACGAAAACAATTGTTAGTTACGCTGTTAGGAGAGCTGTTAAGAAGTGTTAACGGT	GTTAGGAGAGCTGTTAAGAAG 0.484689 1	repeat_sense,igr_sense, NM_114951.2,NM_124625.2,NM_128849.1,NM_102048.1, 26
419 24 NC_003071:2452672-2452753:-1	GATGAGGACGCTCGACCTCGTGGTCGAGTGGTGAGGTGAAGTGGTGATGCCATCTACTCGACCTGGGGTCGAGTGGTTTGTC	ACTCGACCTGGGGTCGAGTGGT 0.156048 1	repeat_sense,igr_sense, NM_126793.1,NM_102953.3,NM_103358.1,NM_180584.1,NM_180575.1,NM_116794.1,NM_113972.1,NM_201705.1,NM_148798.1,NM_148247.1,NM_103339.1,NM_103391.1,NM_148526.1,NM_147956.1,NM_126888.1,NM_148782.1,NM_179436.1,NM_116802.1,NM_179407.2,NM_126833.1,NM_147987.1,NM_103342.1,NM_202235.1,NM_126781.1,NM_122822.1,NM_103143.2,NM_113973.1,NM_179432.1,NM_122821.1,NM_126773.1,NM_147965.1, 802
420 24 NC_003071:2487979-2488152:-1	GTGAAGACACTCGACCTGGGGGTCGAGTGAAGTGATCGAGTATCTCTCGTGGTGGTACTCGGCCAGGGGTCGAGTGATGAGATGAAATCGAGAAGTCCCCTACTCAACCAGGGGGTCGAGTGGTCTGTTGAGGCCTTGAAGCTTCTACCCGACCTCGGGGTCGAGTGGTTTGAC	ACCCGACCTCGGGGTCGAGTGGT 0.181949 1	repeat_sense,igr_sense, NM_126793.1,NM_103358.1,NM_180584.1,NM_116794.1,NM_113972.1,NM_201705.1,NM_148798.1,NM_148247.1,NM_103339.1,NM_103391.1,NM_148526.1,NM_147956.1,NM_126888.1,NM_148782.1,NM_179436.1,NM_116802.1,NM_126833.1,NM_147987.1,NM_103342.1,NM_202235.1,NM_126781.1,NM_113973.1,NM_179432.1,NM_126773.1,NM_147965.1, 631
421 24 NC_003071:2577886-2578027:-1	GAAGACATACTCGACCACCAGGTCGTGTGCATCCAGCACCATACTTGACCCCCAGGTCGAGTGACTTTGGAGCCATTCTTCCCATCTACTCAGCTCAGGCCACTCGATGACGCCACTCGACCCCCTGGTCGAGTATCACTTC	CACTCGACCCCCTGGTCGAGTA 0.228165 1	repeat_sense,igr_sense, NM_122820.1,NM_103358.1,NM_180584.1,NM_116794.1,NM_113972.1,NM_201705.1,NM_148798.1,NM_122819.1,NM_103339.1,NM_122890.1,NM_103391.1,NM_114067.1,NM_126888.1,NM_148782.1,NM_180576.1,NM_116802.1,NM_126833.1,NM_147987.1,NM_114100.1,NM_103342.1,NM_147971.1,NM_148010.1,NM_202235.1,NM_126781.1,NM_122822.1,NM_122889.1,NM_103402.1,NM_113973.1,NM_179432.1,NM_147959.1,NM_122821.1,NM_…
422 24 NC_003071:2622507-2622663:-1	TGATGGTGATACTCGACTTCCGGGTAGAGTGATGAGGTCAAGTAGTGGTCTGGCAATGGGATGAAGACACTCGACCGCGTGGTCGAGTGACGTGATCGAGTGGTGGTCAGAAGATGGAGATGAAGTCACTCGACCTGGGGGTCGAGTGATGTGATCG	CACTCGACCTGGGGGTCGAGTGAT 0.14157 1	repeat_sense,igr_sense, NM_126793.1,NM_122830.1,NM_103358.1,NM_180584.1,NM_116794.1,NM_113972.1,NM_201705.1,NM_148798.1,NM_148247.1,NM_122819.1,NM_103339.1,NM_103391.1,NM_148526.1,NM_147956.1,NM_126888.1,NM_201713.1,NM_148782.1,NM_179436.1,NM_116802.1,NM_126833.1,NM_147987.1,NM_103342.1,NM_202235.1,NM_126781.1,NM_122822.1,NM_113973.1,NM_179432.1,NM_122821.1,NM_126773.1,NM_147965.1, 1100
423 58 NC_003071:2771825-2771935:-1	GTCTGACGATCGGCTTGTCCCACCCGATCCGTCCGATGATCGGTTTGTCCGGTCCAATCCGTCTGGCCGATCCGATCCGTCCGACGATCGGTCTGGCCGATCCGATCTGAC	CGATCGGTCTGGCCGATCCGATC 0.292728 0	repeat_sense,cds_antisense,exon_antisense, NM_180581.1,NM_148774.1,NM_116231.1,NM_104365.1,NM_116769.1,NM_122694.1,NM_126667.1,NM_114591.1,NM_122695.1,NM_113881.1, 127
424 24 NC_003071:2827589-2827781:-1	GTGATGAAGATACTCGACCTTGTGGTCAAGTGGTGTGATCGAGTGATGGTCAGGTGGTGGAGGTGATGATACTCGACCAGGTGGTCGAGTGATGTGATCGAGTGACTCTCATGGTGGTACTCGACCAGGGGGTCAAGTGGTCTGTTGAGGTCGTGAAGCATCTACTTGACCAGGGGGTTGAGTGGTTTGACAT	TCTACTTGACCAGGGGGTTGAGTG 0.0532016 1	repeat_sense,cds_antisense,exon_antisense, NM_117491.1,NM_126793.1,NM_103358.1,NM_180584.1,NM_116794.1,NM_201705.1,NM_148798.1,NM_148247.1,NM_103339.1,NM_106649.2,NM_103391.1,NM_148526.1,NM_147956.1,NM_148782.1,NM_179436.1,NM_116802.1,NM_126833.1,NM_147987.1,NM_103342.1,NM_202458.1,NM_126781.1,NM_111013.2, 281
425 24 NC_003071:2829306-2829434:-1	GTGATGATACTCGACCAGGTGGTCGAGTGATGTGATCGAGTGACTCTCATGGTGGTACTCGACTAGGGGGTCGAGTGGTCTCTTGAGGTCGTGAAGCATCTACTCGGCCAAGGGGTCGAGTGGTTTGAC	TCTACTCGGCCAAGGGGTCGAGTGGT 0.552462 1	repeat_sense,igr_sense, NM_126793.1,NM_103358.1,NM_180584.1,NM_116794.1,NM_201705.1,NM_148798.1,NM_148247.1,NM_103339.1,NM_103391.1,NM_202830.1,NM_148526.1,NM_147956.1,NM_148782.1,NM_179436.1,NM_116802.1,NM_126833.1,NM_147987.1,NM_103342.1,NM_202235.1,NM_126781.1,NM_122822.1,NM_122821.1,NM_126773.1,NM_147965.1, 424
426 24 NC_003071:2829398-2829494:-1	GATGAAGATACTCGACCTTTTGGTCGAGTGGTGTGATCGAGTGATGGTCAGGTGGTGGAGGTGATGATACTCGACCAGGTGGTCGAGTGATGTGATC	TACTCGACCAGGTGGTCGAGTGAT 0.844229 0	repeat_sense,igr_sense, NM_122820.1,NM_126793.1,NM_103358.1,NM_122817.1,NM_180584.1,NM_116794.1,NM_113972.1,NM_201705.1,NM_148798.1,NM_148247.1,NM_120418.2,NM_103339.1,NM_122890.1,NM_103391.1,NM_148526.1,NM_147956.1,NM_114067.1,NM_126888.1,NM_201713.1,NM_148782.1,NM_180576.1,NM_123420.1,NM_179436.1,NM_122815.1,NM_116802.1,NM_126833.1,NM_122143.1,NM_147987.1,NM_103342.1,NM_147971.1,NM_202235.1,NM_…
427 287 NC_003071:2983350-2983453:-1	CTCTCTTTCTCCGACCTCCTCCGAGAAACCCATCTCTCCTCCTCCATTTTTGCCCTTGGAGTTTCATCAGCAAGTTTCTCGGAGTCTCGTCGGAGAGATCGGAG	TCTCGGAGTCTCGTCGGAGAGA 0.634577 0	utr_sense,exon_sense, NM_105877.3,NM_202608.1,NM_115919.1,NM_115362.1,NM_180414.2,NM_129659.2,NM_112954.2,NM_124677.2,NM_112786.2,NM_118133.2,NM_112545.1,NM_115642.2,NM_129045.1,NM_123459.1,NM_128569.3,NM_128570.1,NM_115965.2, 9
428 24 NC_003071:3110203-3110350:-1	CGGTACTCGACCCAGGTGGTCGAGTAGTGGGTCGAGTGACAAGTCGGAGTCTTCTTCTCTTCCTCATGCTCGAGTGTCTGGTTGAGTGCGGAATCGAGAAGACTCTAAAGCGATGATGCTTTCTACTCGACCAGGGGGTCGAGTAGTG	TTCTACTCGACCAGGGGGTCGAGTA 1.42023 1	repeat_sense,igr_sense, NM_126793.1,NM_103358.1,NM_122817.1,NM_180584.1,NM_116794.1,NM_113972.1,NM_201705.1,NM_148798.1,NM_148247.1,NM_103339.1,NM_122890.1,NM_119847.2,NM_103391.1,NM_148526.1,NM_147956.1,NM_126888.1,NM_201713.1,NM_148782.1,NM_180576.1,NM_179436.1,NM_122815.1,NM_116802.1,NM_126833.1,NM_147987.1,NM_103342.1,NM_147971.1,NM_202235.1,NM_126781.1,NM_122822.1,NM_122889.1,NM_113973.1,NM_…
429 24 NC_003071:3541673-3541744:-1	TTACTCGACCTCGTGGTCGAGTGGTGTCATCGAGTGGCCTAGACTGAGGTACTCGACCACGAGGTCGAGTAA	GGTACTCGACCACGAGGTCGAGT 0.928176 1	repeat_sense,igr_sense, NM_122820.1,NM_117538.1,NM_117954.1,NM_123831.1,NM_126793.1,NM_103358.1,NM_180584.1,NM_116794.1,NM_113972.1,NM_201705.1,NM_148798.1,NM_148247.1,NM_122819.1,NM_103339.1,NM_122890.1,NM_103391.1,NM_148526.1,NM_147956.1,NM_114067.1,NM_126888.1,NM_201713.1,NM_148782.1,NM_180576.1,NM_179734.1,NM_123420.1,NM_179436.1,NM_100205.3,NM_116802.1,NM_126833.1,NM_147987.1,NM_114100.1,NM_…
430 24 NC_003071:3554760-3554834:-1	CTGCTACTCGACCTCGGGGTCGAGTGGTTGTGAGAAGTGGTGAGTCTTCTACTCGACCTAAGGGTCGAGTGGTGG	CTACTCGACCTAAGGGTCGAGTGGTG 0.715098 1	repeat_sense,cds_antisense,exon_antisense, NM_126793.1,NM_103358.1,NM_180584.1,NM_116794.1,NM_113972.1,NM_148798.1,NM_148247.1,NM_121575.2,NM_122819.1,NM_103339.1,NM_103391.1,NM_148526.1,NM_147956.1,NM_114067.1,NM_126888.1,NM_148782.1,NM_179436.1,NM_116802.1,NM_126833.1,NM_147987.1,NM_103342.1,NM_202235.1,NM_126781.1,NM_113973.1,NM_179432.1,NM_126773.1,NM_147965.1, 450
431 24 NC_003071:3644862-3645025:-1	GAAGATATACTCGACCACCATGTCGTGTGCATCCAGCGCCATACTCGACCCCCTGGTCGAGTGACTTTGGAGCCATTCTTCCCATCTACTGGACCCCCAGATCGAGTAACCTCAGCTCAGGCCACTCGATGACGCCACTCGACCCCCTGGTCGAGTATCACTTC	CCACTCGACCCCCTGGTCGAGTA 0.316582 0	repeat_sense,igr_sense, NM_122820.1,NM_103358.1,NM_180584.1,NM_116794.1,NM_113972.1,NM_201705.1,NM_148798.1,NM_122819.1,NM_103339.1,NM_122890.1,NM_103391.1,NM_114067.1,NM_126888.1,NM_148782.1,NM_180576.1,NM_116802.1,NM_126833.1,NM_147987.1,NM_114100.1,NM_103342.1,NM_147971.1,NM_148010.1,NM_202235.1,NM_126781.1,NM_122822.1,NM_122889.1,NM_103402.1,NM_113973.1,NM_179432.1,NM_147959.1,NM_122821.1,NM_…
432 24 NC_003071:3738534-3738625:-1	GATGAGGTCTTCTACTCGACCAGGGGGTCGAGTGGTCTGTTGAAGTCGTGAAACATCTACTCGACCAGGGGGTCGAGTGGTTTGATATGATC	TCTACTCGACCAGGGGGTCGAGTGGTT 0.565626 0	repeat_sense,igr_sense, NM_126793.1,NM_103358.1,NM_122817.1,NM_180584.1,NM_116794.1,NM_113972.1,NM_201705.1,NM_148798.1,NM_148247.1,NM_103339.1,NM_122890.1,NM_103391.1,NM_119847.2,NM_148526.1,NM_147956.1,NM_126888.1,NM_201713.1,NM_148782.1,NM_180576.1,NM_179436.1,NM_122815.1,NM_116802.1,NM_126833.1,NM_147987.1,NM_103342.1,NM_147971.1,NM_202235.1,NM_126781.1,NM_122822.1,NM_122889.1,NM_113973.1,NM_…
433 24 NC_003071:3738540-3738619:-1	GTCTTCTACTCGACCAGGGGGTCGAGTGGTCTGTTGAAGTCGTGAAACATCTACTCGACCAGGGGGTCGAGTGGTTTGAT	TACTCGACCAGGGGGTCGAGT 0.462115 0	repeat_sense,igr_sense, NM_126793.1,NM_103358.1,NM_122817.1,NM_180584.1,NM_116794.1,NM_113972.1,NM_201705.1,NM_148798.1,NM_148247.1,NM_103339.1,NM_122890.1,NM_119847.2,NM_103391.1,NM_148526.1,NM_147956.1,NM_126888.1,NM_201713.1,NM_148782.1,NM_180576.1,NM_179436.1,NM_122815.1,NM_116802.1,NM_126833.1,NM_147987.1,NM_103342.1,NM_147971.1,NM_202235.1,NM_126781.1,NM_122822.1,NM_122889.1,NM_113973.1,NM_…
434 28 NC_003071:3738835-3738930:-1	TGGTCGAGTGGTAAGCTGGAGTCTTCTTTTCTTCCTTTTGCTCGAGTGTCTAGTTGAATGCAGAATATAGAAGACTCCGAAGCTGGCAGTCGAGTA	AGAAGACTCCGAAGCTGGCA 0.349586 0	repeat_sense,igr_sense, NM_126430.1,NM_126793.1,NM_201705.1,NM_201713.1,NM_126833.1,NM_113995.1,NM_126773.1, 59
435 24 NC_003071:3746306-3746397:-1	GATGAGGTATTCTACTCGACTAGGGGGTCGAGTGGTCTGTTGAGGTCGTGAAGCATCTACTCGACCAGGGGGTCGAGTGGTTTGATATGATC	TCTACTCGACCAGGGGGTCGAGTGGTT 0.461735 0	repeat_sense,igr_sense, NM_126793.1,NM_103358.1,NM_122817.1,NM_180584.1,NM_116794.1,NM_113972.1,NM_201705.1,NM_148798.1,NM_148247.1,NM_103339.1,NM_122890.1,NM_119847.2,NM_103391.1,NM_148526.1,NM_147956.1,NM_126888.1,NM_201713.1,NM_148782.1,NM_180576.1,NM_179436.1,NM_122815.1,NM_116802.1,NM_126833.1,NM_147987.1,NM_103342.1,NM_147971.1,NM_202235.1,NM_126781.1,NM_122822.1,NM_122889.1,NM_113973.1,NM_…
436 24 NC_003071:3746314-3746390:-1	TATTCTACTCGACTAGGGGGTCGAGTGGTCTGTTGAGGTCGTGAAGCATCTACTCGACCAGGGGGTCGAGTGGTTTG	TACTCGACCAGGGGGTCGAGT 0.287194 0	repeat_sense,igr_sense, NM_126793.1,NM_103358.1,NM_122817.1,NM_180584.1,NM_116794.1,NM_113972.1,NM_201705.1,NM_148798.1,NM_148247.1,NM_103339.1,NM_122890.1,NM_119847.2,NM_103391.1,NM_148526.1,NM_147956.1,NM_126888.1,NM_201713.1,NM_148782.1,NM_180576.1,NM_179436.1,NM_122815.1,NM_116802.1,NM_126833.1,NM_147987.1,NM_103342.1,NM_147971.1,NM_202235.1,NM_126781.1,NM_122822.1,NM_122889.1,NM_113973.1,NM_…
437 24 NC_003071:3746353-3746442:-1	TGTCGTGGGGGTACTCGATCATGGGGTCGAGTGGTGACGTAAAGTGATGAGGTATTCTACTCGACTAGGGGGTCGAGTGGTCTGTTGAGG	TCTACTCGACTAGGGGGTCGAGTGGT 0.480777 0	repeat_sense,igr_sense, NM_126793.1,NM_103358.1,NM_147281.1,NM_180584.1,NM_116794.1,NM_113972.1,NM_201705.1,NM_148798.1,NM_148247.1,NM_103339.1,NM_103391.1,NM_148526.1,NM_147956.1,NM_201713.1,NM_148782.1,NM_179436.1,NM_116802.1,NM_126833.1,NM_147987.1,NM_103342.1,NM_202235.1,NM_126781.1,NM_122822.1,NM_113973.1,NM_179432.1,NM_122821.1,NM_120741.2,NM_126773.1,NM_147965.1, 695
438 24 NC_003071:3780144-3780221:-1	GAGACCACTCGACCCCCAGGTCGAGTAGAGGACATCACCACTTCACTTCACCACTCGACCACGAGGTCGGGTGCCCTC	CCACTCGACCACGAGGTCGGGTG 0.65887 0	repeat_sense,igr_sense, NM_117954.1,NM_126793.1,NM_103358.1,NM_180584.1,NM_116794.1,NM_201705.1,NM_148798.1,NM_148247.1,NM_122819.1,NM_103339.1,NM_122890.1,NM_103391.1,NM_148526.1,NM_147956.1,NM_126888.1,NM_148782.1,NM_180576.1,NM_179436.1,NM_116802.1,NM_126833.1,NM_147987.1,NM_147971.1,NM_202235.1,NM_126781.1,NM_122822.1,NM_122889.1,NM_113973.1,NM_179432.1,NM_147959.1,NM_122821.1,NM_180578.1,NM_…
439 24 NC_003071:3833000-3833071:-1	GCTACTCGACCAGGGGGTCGAGTGGTGTTGTGAAGTGGGGAAGTCATCTACTCGACCTCGTGGTCGAGTGGT	CTACTCGACCTCGTGGTCGAGTG 0.559535 0	repeat_sense,igr_sense, NM_122820.1,NM_126793.1,NM_103358.1,NM_180584.1,NM_116794.1,NM_113972.1,NM_201705.1,NM_148798.1,NM_148247.1,NM_122819.1,NM_103339.1,NM_122890.1,NM_103391.1,NM_148526.1,NM_147956.1,NM_114067.1,NM_126888.1,NM_201713.1,NM_148782.1,NM_180576.1,NM_179436.1,NM_116802.1,NM_126833.1,NM_147987.1,NM_114100.1,NM_103342.1,NM_147971.1,NM_202235.1,NM_126781.1,NM_122822.1,NM_122889.1,NM_…
440 24 NC_003071:3837609-3837680:-1	ACTACTCGACCAGGGGGTCGAGTGGTGTTGTGAAGTGGTGAAGTCATCTACTCGACCTCGTGGTCGAGTGGT	CTACTCGACCTCGTGGTCGAGTG 0.637514 0	repeat_sense,igr_sense, NM_122820.1,NM_126793.1,NM_103358.1,NM_180584.1,NM_116794.1,NM_113972.1,NM_201705.1,NM_148798.1,NM_148247.1,NM_122819.1,NM_103339.1,NM_122890.1,NM_103391.1,NM_148526.1,NM_147956.1,NM_114067.1,NM_126888.1,NM_201713.1,NM_148782.1,NM_180576.1,NM_179436.1,NM_116802.1,NM_126833.1,NM_147987.1,NM_114100.1,NM_103342.1,NM_147971.1,NM_202235.1,NM_126781.1,NM_122822.1,NM_122889.1,NM_…
441 24 NC_003071:3980015-3980091:-1	GAGACCACTCGACCCCAGGTCGAGTAGAAGACATCACCACTTCACTTCACCACTCGACCACGAGGTCGACTGCCCTC	CCACTCGACCACGAGGTCGACTG 0.324178 0	repeat_sense,igr_sense, NM_122820.1,NM_126793.1,NM_103358.1,NM_180584.1,NM_116794.1,NM_201705.1,NM_148798.1,NM_112218.1,NM_148247.1,NM_122819.1,NM_103339.1,NM_122890.1,NM_103391.1,NM_148526.1,NM_147956.1,NM_114067.1,NM_126888.1,NM_148782.1,NM_180576.1,NM_179436.1,NM_100205.3,NM_116802.1,NM_126833.1,NM_147987.1,NM_114100.1,NM_147971.1,NM_202235.1,NM_126781.1,NM_122822.1,NM_122889.1,NM_113973.1,NM_…
442 24 NC_003071:4160722-4160903:-1	GTAGTACTCGACCTCGTGGTCGAGTGGGAGTGATCGAGTGGACGGCGAGAATTGGATGTGGTGATACTCGATCACTTGGTCGAGTAGTGATGAGGAATGGTGAAGGCAGCTACTCGACCAGGGGGTCGAGTGGTCTTGTGAAGTGGTGGAGTCGTCTACTCGACAAGGGGGTCGAGTGGTAT	ACTCGACAAGGGGGTCGAGTG 0.261026 1	repeat_sense,igr_sense, NM_126793.1,NM_103358.1,NM_180584.1,NM_116794.1,NM_113972.1,NM_201705.1,NM_148798.1,NM_148247.1,NM_103339.1,NM_103391.1,NM_148526.1,NM_147956.1,NM_148782.1,NM_179436.1,NM_116802.1,NM_126833.1,NM_147987.1,NM_103342.1,NM_202235.1,NM_126781.1,NM_122822.1,NM_113973.1,NM_179432.1,NM_122821.1,NM_126773.1,NM_147965.1, 619
443 24 NC_003071:4225664-4225738:-1	AGACCACTCGACCCCCTGGTCGAGTAGAGGACATCACCACTTCACCTCACCACTCGACCCCGAGGTCGAGTGTCT	CCACTCGACCCCGAGGTCGAGTGT 0.56805 0	repeat_sense,igr_sense, NM_122820.1,NM_126793.1,NM_130345.2,NM_103358.1,NM_113671.2,NM_180584.1,NM_116794.1,NM_113972.1,NM_201705.1,NM_148798.1,NM_148247.1,NM_122819.1,NM_103339.1,NM_122890.1,NM_103391.1,NM_126651.1,NM_148526.1,NM_147956.1,NM_114067.1,NM_126888.1,NM_148782.1,NM_180576.1,NM_179436.1,NM_100205.3,NM_116802.1,NM_114441.1,NM_126833.1,NM_147987.1,NM_114100.1,NM_103342.1,NM_147971.1,NM_…
444 288 NC_003071:4254825-4254983:-1	GAATCTCTATTTCACTCCCCACAAAATGGAAGTTAATGTCCAGTTTTTCCCTAAATCGAAAGTTTGAATTCTAAGAGTTCGTAAGACTTGTTCGTTTGATTTGATCTATAATGAAATTGGACTTTAACTTCCATTTTGTGGGGACTGAGATAGACATTC	CCATTTTGTGGGGACTGAGA 0.240064 1	repeat_sense,igr_sense, NM_125806.2,NM_118731.1, 5
445 289 NC_003071:4316601-4316713:-1	AGAGGGGGTTAATGAAAGAGGTTCACCCCTAGGGGGTGAATCTATTCATTCACCCCTTTGAACAATTCTTGGGTTCACCCCCTAGGGGGTGAATCCATTCATTGACCCCTTTT	GGGGGTGAATCCATTCATTGA 0.420851 0	repeat_sense,igr_sense, NM_180634.1,NM_121117.1,NM_104411.3,NM_180636.1,NM_180635.1, 16
446 38 NC_003071:4407810-4407912:-1	TAGAGGGGTATCGATCGACACCTTCGTACTGGCTCGTCTCAGAGAAGAGCGTCCCGTAGGGTGTCAGATCGACAGTGGAAGGTGTCGATCGACACCATCTCTG	TGGAAGGTGTCGATCGACACCAT 0.474334 1	repeat_sense,igr_sense, NM_114016.1,NM_126896.1,NM_126950.1,NM_115550.3,NM_116818.1,NM_147252.1,NM_114110.1,NM_148529.1,NM_114074.1,NM_114079.1,NM_148522.1,NM_122848.1,NM_126918.1, 608
447 290 NC_003071:4411536-4411651:-1	GAAAAGAATCGCAAATCCCTCGCAACTGTTGCGAGGGAAGTACTAGAACTGTAGTTGCGTGTGTTTTGCGAGGAAAACAGTTGCTCGCAAAATTTGCGAGGGAATTGCGACTTTTT	ATTTGCGAGGGAATTGCGAC 0.132206 1	repeat_sense,igr_sense, NM_104162.1,NM_121609.2,NM_113908.1,NM_122762.1, 72
448 2 NC_003071:4411542-4411643:-1	TCGCAAATCCCTCGCAACTGTTGCGAGGGAAGTACTAGAACTGTAGTTGCGTGTGTTTTGCGAGGAAAACAGTTGCTCGCAAAATTTGCGAGGGAATTGCGA	CTCGCAAAATTTGCGAGGGAAT 0.389478 0	repeat_sense,igr_sense, NM_104162.1,NM_121142.2,NM_122762.1, 215
449 38 NC_003071:4470433-4470544:-1	GGGGTTGGTGTCGATCGACACCTCTGTTGTGTCGCTCGACACCAATCGCGTCTACATTATGCTCCCAAAGGTGTCGATCGACACCCAGTTGGTGTCGCTCGACACCGAGCCC	GTTGGTGTCGCTCGACACCG 0.228096 0	repeat_sense,igr_sense, NM_114016.1,NM_126896.1,NM_126950.1,NM_111421.2,NM_116818.1,NM_114110.1,NM_148529.1,NM_114079.1,NM_122848.1,NM_126918.1, 150
450 291 NC_003071:4471895-4471974:-1	AGAGGTGAGTCAATCGACACCATCGTGTGGAATCTTCTCAGAGAAGATTTTTTCATAGGGTGTCGATAGACACCATCTCT	GGTGTCGATAGACACCATCT 0.0904899 0	repeat_sense,igr_sense, NM_114016.1,NM_126896.1,NM_126950.1,NM_121375.3,NM_114079.1,NM_122848.1, 148
451 292 NC_003071:4847916-4848059:-1	TCGATCGACAGGACTTGGGTGTCGATCGACACCATCATGAATAGTTTCCTCCTCCTCCGCAAAATTGTCAATTCCACTCGACAAAGGAAAAACAGAGGCGTCAAGAGTAACTGGTGTCGATCGACACCCTGGTGTATCGATCGA	TGTCGATCGACACCCTGGTG 0.273699 1	repeat_sense,igr_sense, NM_126950.1,NM_114074.1,NM_114079.1,NM_148519.1,NM_103410.1, 172
452 24 NC_003071:4942806-4942932:-1	GATGAGGGCACTCGACCCTGAGGTCGAGTGGTGAAGTGCAGTGGTGATGTCCTTTACTCGCCTGGTGGTCGAGTGGTCTCTTGAGATCTTGAAGCTCCTACTCGACCTCTGGGTCGAGTGGTTTGTC	CTACTCGACCTCTGGGTCGAGTG 0.489566 1	repeat_sense,cds_antisense,exon_antisense, NM_122820.1,NM_126793.1,NM_103358.1,NM_180584.1,NM_116794.1,NM_113972.1,NM_148798.1,NM_148247.1,NM_111050.1,NM_122819.1,NM_103339.1,NM_122890.1,NM_103391.1,NM_148526.1,NM_147956.1,NM_114067.1,NM_126888.1,NM_201713.1,NM_148782.1,NM_180576.1,NM_179436.1,NM_116802.1,NM_126833.1,NM_147987.1,NM_103342.1,NM_147971.1,NM_202235.1,NM_126781.1,NM_122822.1,NM_12288…
453 24 NC_003071:5257501-5257597:-1	GGTGAAGACACTAGACCTCGGGGTCGAGTGATGTGATCGAGTGATGGTCAGGTTGTGGAGGTGAAGACACTCGGCCTCGGGGTCAAGTGATGTGATC	CACTCGGCCTCGGGGTCAAGT 0.596311 0	repeat_sense,igr_sense, NM_103358.1,NM_180584.1,NM_116794.1,NM_201705.1,NM_148798.1,NM_148247.1,NM_103391.1,NM_148526.1,NM_147956.1,NM_126888.1,NM_179436.1,NM_116802.1,NM_126833.1,NM_125121.1,NM_147987.1,NM_103342.1,NM_202235.1,NM_126781.1,NM_113973.1,NM_179432.1,NM_126773.1,NM_147965.1, 154
454 24 NC_003071:5257509-5257589:-1	CACTAGACCTCGGGGTCGAGTGATGTGATCGAGTGATGGTCAGGTTGTGGAGGTGAAGACACTCGGCCTCGGGGTCAAGTG	GAGGTGAAGACACTCGGCCTCG 0.0305481 0	repeat_sense,igr_sense, NM_180789.1,NM_113972.1,NM_103391.1,NM_147956.1,NM_126888.1,NM_123573.3,NM_147987.1,NM_202235.1,NM_126781.1,NM_122828.1,NM_113973.1,NM_179432.1,NM_147965.1, 166
455 24 NC_003071:5267920-5268094:-1	GTGAAGACACTCGGCCTCGGGGTCGAGTGATGTGATCGAGTGTTTCTCGTGGTGGTACTCGGCTAGGGAGTCGAGTGATGAGGTGAAATGGTGAAGGACACTACTCGAACAGGGGATCGAGTGTTCTGTTGAGGTCGTGAAGCGTCTACTCGACCTGGGGGTCGAGTGGTTTGAC	TCTACTCGACCTGGGGGTCGAGTGGT 0.464666 1	repeat_sense,igr_sense, NM_126793.1,NM_122830.1,NM_103358.1,NM_180584.1,NM_116794.1,NM_113972.1,NM_201705.1,NM_148798.1,NM_148247.1,NM_122819.1,NM_103339.1,NM_103391.1,NM_148526.1,NM_147956.1,NM_126888.1,NM_201713.1,NM_148782.1,NM_179436.1,NM_116802.1,NM_126833.1,NM_147987.1,NM_103342.1,NM_202235.1,NM_126781.1,NM_122822.1,NM_113973.1,NM_179432.1,NM_122821.1,NM_120741.2,NM_126773.1,NM_147965.1, 11…
456 24 NC_003071:5268058-5268154:-1	GGTGAAGACACTCGACCTCGGGGTCGAGTGATGTGATCGAGTGATGGTCATGTTGTGGAGGTGAAGACACTCGGCCTCGGGGTCGAGTGATGTGATC	CACTCGGCCTCGGGGTCGAGT 0.434197 0	repeat_sense,igr_sense, NM_126793.1,NM_103358.1,NM_180584.1,NM_116794.1,NM_113972.1,NM_148798.1,NM_148247.1,NM_103339.1,NM_103391.1,NM_148526.1,NM_147956.1,NM_126888.1,NM_179436.1,NM_116802.1,NM_126833.1,NM_147987.1,NM_103342.1,NM_202235.1,NM_126781.1,NM_113973.1,NM_179432.1,NM_122821.1,NM_126773.1,NM_147965.1, 469
457 24 NC_003071:5274826-5274922:-1	GGTGAAGACACTCGACCTCGGGGTCGAGTGATGTGATCGAGTGATGGTCAGGTTGTGGAGGTGAAGACACTCGGCCTCGTGGTCGAGTGATGTGATC	CCTCGTGGTCGAGTGATGTG 0.159666 0	repeat_sense,igr_sense, NM_116794.1,NM_113972.1,NM_201705.1,NM_148798.1,NM_103391.1,NM_147956.1,NM_147987.1,NM_103342.1,NM_202235.1,NM_126781.1,NM_113973.1,NM_179432.1,NM_147965.1, 209
458 24 NC_003071:5274826-5274922:-1	GGTGAAGACACTCGACCTCGGGGTCGAGTGATGTGATCGAGTGATGGTCAGGTTGTGGAGGTGAAGACACTCGGCCTCGTGGTCGAGTGATGTGATC	CACTCGGCCTCGTGGTCGAGT 0.777725 0	repeat_sense,igr_sense, NM_122820.1,NM_103358.1,NM_180584.1,NM_116794.1,NM_113972.1,NM_201705.1,NM_148798.1,NM_148247.1,NM_103339.1,NM_103391.1,NM_148526.1,NM_147956.1,NM_114067.1,NM_126888.1,NM_179436.1,NM_116802.1,NM_126833.1,NM_147987.1,NM_103342.1,NM_202235.1,NM_126781.1,NM_113973.1,NM_179432.1,NM_122821.1,NM_180578.1,NM_126773.1,NM_147965.1, 368
459 24 NC_003071:5274834-5274914:-1	CACTCGACCTCGGGGTCGAGTGATGTGATCGAGTGATGGTCAGGTTGTGGAGGTGAAGACACTCGGCCTCGTGGTCGAGTG	AGGTGAAGACACTCGGCCTCG 0.076515 0	repeat_sense,igr_sense, NM_113972.1,NM_103391.1,NM_147956.1,NM_126888.1,NM_147987.1,NM_202235.1,NM_126781.1,NM_122828.1,NM_113973.1,NM_179432.1,NM_147965.1, 149
460 24 NC_003071:5281549-5281645:-1	GGTGAAGACACTCGACCTCGGGGTCGAGTGATGTGATCGAGTGATGGTCAGGTTGTGGAGGTGAAGACACTCGGCCTCGTGGTCGAGTGATGTGATC	CCTCGTGGTCGAGTGATGTG 0.159666 0	repeat_sense,igr_sense, NM_116794.1,NM_113972.1,NM_201705.1,NM_148798.1,NM_103391.1,NM_147956.1,NM_147987.1,NM_103342.1,NM_202235.1,NM_126781.1,NM_113973.1,NM_179432.1,NM_147965.1, 209
461 24 NC_003071:5281549-5281645:-1	GGTGAAGACACTCGACCTCGGGGTCGAGTGATGTGATCGAGTGATGGTCAGGTTGTGGAGGTGAAGACACTCGGCCTCGTGGTCGAGTGATGTGATC	CACTCGGCCTCGTGGTCGAGT 0.777725 0	repeat_sense,igr_sense, NM_122820.1,NM_103358.1,NM_180584.1,NM_116794.1,NM_113972.1,NM_201705.1,NM_148798.1,NM_148247.1,NM_103339.1,NM_103391.1,NM_148526.1,NM_147956.1,NM_114067.1,NM_126888.1,NM_179436.1,NM_116802.1,NM_126833.1,NM_147987.1,NM_103342.1,NM_202235.1,NM_126781.1,NM_113973.1,NM_179432.1,NM_122821.1,NM_180578.1,NM_126773.1,NM_147965.1, 368
462 24 NC_003071:5281557-5281637:-1	CACTCGACCTCGGGGTCGAGTGATGTGATCGAGTGATGGTCAGGTTGTGGAGGTGAAGACACTCGGCCTCGTGGTCGAGTG	AGGTGAAGACACTCGGCCTCG 0.076515 0	repeat_sense,igr_sense, NM_113972.1,NM_103391.1,NM_147956.1,NM_126888.1,NM_147987.1,NM_202235.1,NM_126781.1,NM_122828.1,NM_113973.1,NM_179432.1,NM_147965.1, 149
463 38 NC_003071:5500140-5500261:-1	TGGTGTCGGTCGACACTATCAATGTGTGTCGAGCGATTTTGGAGATCAATGTCGAGCTTGCTCGATTCTGCTTCGTCACAGCCTGATGTCTCGTATATATGCGATGGTGTCGATCGACACCA	TGCGATGGTGTCGATCGACAC 0.273883 0	repeat_sense,cds_antisense,exon_antisense, NM_128025.1,NM_114016.1,NM_126896.1,NM_126950.1,NM_116818.1,NM_114110.1,NM_148529.1,NM_114074.1,NM_114079.1,NM_148282.1,NM_106401.3,NM_122848.1,NM_126918.1, 404
464 24 NC_003071:5506117-5506259:-1	GATTGTGGGACTCGACCATGTAATCGAGTGGTGGAGGCAGCTACTCGACCTGGGGGTCGACGGGTGTGTTGTAGAGGATGTGGACGAGTACATCAGGAACTCCAGGATGACGGTACTCGAGCTCGTGGTCGAGTATAATGATT	TACTCGAGCTCGTGGTCGAGT 0.0573756 1	repeat_sense,igr_sense, NM_122820.1,NM_101667.1,NM_103358.1,NM_113671.2,NM_180584.1,NM_116794.1,NM_113972.1,NM_201705.1,NM_148798.1,NM_148247.1,NM_103339.1,NM_103391.1,NM_148526.1,NM_147956.1,NM_114067.1,NM_126888.1,NM_111001.1,NM_179436.1,NM_116802.1,NM_126833.1,NM_147987.1,NM_114100.1,NM_103342.1,NM_202235.1,NM_126781.1,NM_113973.1,NM_179432.1,NM_180578.1,NM_126773.1,NM_147965.1, 325
465 28 NC_003071:5506325-5506422:-1	TTGGTCGAGTGATTAGCTGGAGTCTTCTTCTCTTCCTTATGCTCGAGTGTCTTGTTGAGTGCAGATTTGAGAAGACTCTGAAGCTGGCAGTCGAGTAG	GAGAAGACTCTGAAGCTGGCA 0.128214 0	repeat_sense,igr_sense, NM_126430.1,NM_123958.2,NM_126793.1,NM_201705.1,NM_148526.1,NM_147956.1,NM_201713.1,NM_126833.1,NM_179950.1,NM_128183.2,NM_111963.2,NM_126773.1,NM_121699.3, 104
466 24 NC_003071:5584560-5584688:-1	ATGATGGCACTCGACCTCGGGGTCGAGTGGTGAGGTGAAGTGGTGATGTGCTCTACTCGACCTGGTTGTCGAGTGGTCTCTTGAGATCTTGAAGCTCCTACTCGACCTCTTGGTCGAGTGGTTTGTCAT	CTACTCGACCTCTTGGTCGAGTGGT 0.86018 1	repeat_sense,igr_sense, NM_122820.1,NM_126793.1,NM_103358.1,NM_180584.1,NM_116794.1,NM_113972.1,NM_201705.1,NM_148798.1,NM_148247.1,NM_122819.1,NM_103339.1,NM_122890.1,NM_103391.1,NM_148526.1,NM_147956.1,NM_114067.1,NM_126888.1,NM_201713.1,NM_148782.1,NM_180576.1,NM_179436.1,NM_116802.1,NM_126833.1,NM_147987.1,NM_114100.1,NM_103342.1,NM_105009.2,NM_147971.1,NM_202235.1,NM_126781.1,NM_122889.1,NM_…
467 293 NC_003071:5756242-5756366:-1	AGTTTCCGTTGAACCAAACGACGTTGTTTTAAATTCACTAAGAAAAAAAATTAAGTACTTTAGGGAATCAAACAATTATTTTTTTTAGTGAATTCAAAACGACGTCGTTTCGTTCTACGAAGACT	AAACGACGTCGTTTCGTTCT 0.161387 1	repeat_sense,igr_sense, NM_113668.1,NM_123546.3,NM_123231.1,NM_122292.2,NM_124986.3,NM_128733.3,NM_119535.3,NM_120206.2,NM_119943.2,NM_202207.1,NM_124754.1,NM_102744.1,NM_123954.1,NM_126371.2,NM_111285.3,NM_117178.2,NM_125044.1,NM_100714.2,NM_180787.1, 95
468 36 ath-MIR405a NC_003071:9642077-9642139:-1	AATGAGTTATGGGTTGACCCAACTCATTTTGTTAAATGAGTTGGGTCTAACCCATAACTCATT	ATGAGTTGGGTCTAACCCATAACT 1	repeat_sense,igr_sense, NM_113768.2,NM_180674.2,NM_113585.2,NM_106502.1,NM_111609.1,NM_112601.3,NM_124203.1, 98
469 294 NC_003071:10233362-10233471:-1	GGGCTTGGGAAATATCCTTGGCCGTCCTGGTACTGGAGGAATGATGCCCGGCATGCCGGGAACTAGGGTGATGCCTATGGATGAAGACGGCTGGGAAATGGCACGGACCC	AAGACGGCTGGGAAATGGCA 0.0373493 0	exon_sense,cds_sense, NM_105451.2, 2
470 295 NC_003071:10641465-10641588:-1	TGACACGGAAGCATAGCTCCATATCCTTCAATGGAGGTGTGGTCCTTCAACAAAAATACCCCCCTCTTGAAACTCTGTTTCACCACACCTCCATTGAAGGACCTGAAGCTATGCTTCCTTGTCA	TTGAAGGACCTGAAGCTATGCT 0.430052 1	igr_sense, NM_127215.3,NM_100847.2, 8
471 110 NC_003071:10814405-10814573:-1	AAGTTGTTCGTTTGCCTGTCGCTGGTTCAGCGACCAAAAATAGCGATAATCGCCAGCGATCAGCGACCGCAATTTTTGGTCGCTGAAATTTTTAGCGATCAGTCGCTGGTTTTAGCGATTAGTCGATACTTTTGATCGCTGGATCCAGCGACATGCAAACGAACAACTT	TCCAGCGACATGCAAACGAACAA 0.00915539 1	intron_antisense, NM_100444.1,NM_122608.1,NM_202257.1,NM_128095.2, 73
472 296 NC_003071:11949980-11950105:-1	GGTCGTTGTTGGCTGCTGTGGCATCATCAAGATTCACATCTGTTGATGGACGGTGGTGATTCACTCTCCACAAAGTTCTCTATGAAAATGAGAATCTTGATGATGCTGCATCGGCAATCAACGACT	TGATGCTGCATCGGCAATCAAC 0.114526 1	exon_sense,cds_sense, NM_113468.3,NM_126040.2,NM_123447.2,NM_124097.1, 8
473 30 ath-MIR172a NC_003071:11949994-11950091:-1	GCTGTGGCATCATCAAGATTCACATCTGTTGATGGACGGTGGTGATTCACTCTCCACAAAGTTCTCTATGAAAATGAGAATCTTGATGATGCTGCATC	AGAATCTTGATGATGCTGCAT 1	exon_sense,cds_sense, HASH(0xd623b6c) NM_111990.2,NM_179982.1,NM_201823.1,NM_104294.2,NM_101959.1,NM_111656.2,NM_121293.2,NM_201824.1,NM_119856.2,NM_128415.2,NM_126118.2,NM_180132.1,NM_119670.2,NM_102967.2,NM_121961.1,NM_125976.2,NM_125405.3, 29
474 297 NC_003071:12302597-12302751:-1	CCGAAGCGATTTTCGGACGAAACCCGCTTGGAGATTCAAAGGAGTTTCTACAGCTCAAGTGACGAGGAATAGGGATTAAAGGCATCTCGGAAGAGAAGCAAGGGACAGTTTTATCCTTCTTCTTACTAGGGTTTTGGCTCCGGAGGTGGCTTTGG	AGGGTTTTGGCTCCGGAGGT 0.295922 1	cds_antisense,exon_antisense, NM_104053.2,NM_124204.3,NM_119959.2,NM_128427.2,NM_128741.1, 4
475 298 NC_003071:13668223-13668317:-1	GCGGCAGCGGCTGCGGTTGCGGCAGCGGCAACGGTAACACTGCCGCAGGTTGTTGTTCGTTTCGTCGCCGCCAACGTTGCCGCAGCCGCTGTCGC	AACGTTGCCGCAGCCGCTGT 0.0740814 0	igr_sense, NM_121417.2,NM_112304.2,NM_112337.2, 3
476 299 ath-MIR417 NC_003071:13715825-13715941:-1	AAATATATTCAAAAGTGGTCAAAACACGTCACTATTTCCTTTATGTTTTCCCCTTATTGATGGAAATGGTTAAACATGAAGGTAGTGAATTTGTTCGAATAATATGTTGATATATTT	GAAGGTAGTGAATTTGTTCGA 0	igr_sense, NM_113526.1,NM_124346.1, 4
477 300 NC_003071:14088912-14088978:-1	GTCGTTGCATCTGGGTGAATGGGCCTGTCATCGTCGGTGCTGGCCCATCAGGCCTAGCTGTCGCCGC	GGCCCATCAGGCCTAGCTGT 0.19298 0	exon_sense,cds_sense, NM_124189.2,NM_126521.2, 3
478 66 ath-MIR399d NC_003071:14450057-14450156:-1	GGTTGGATTACTGGGCGAATACTCCTATGGCAGATCGCATTGGCTAGATATGCAAGTAAAATGCTTCTCTGCCAAAGGAGATTTGCCCCGCAATTCATCC	TCTGCCAAAGGAGATTTGCCCCG 0.695298 1	igr_sense, HASH(0xd639484) NM_179017.1,NM_121010.2,NM_123353.2,NM_179887.1,NM_111526.3,NM_116428.2, 11
479 66 NC_003071:14450061-14450152:-1	GGATTACTGGGCGAATACTCCTATGGCAGATCGCATTGGCTAGATATGCAAGTAAAATGCTTCTCTGCCAAAGGAGATTTGCCCCGCAATTC	CTCTGCCAAAGGAGATTTGC 0.300469 0	igr_sense, HASH(0xd636164) NM_179887.1,NM_102822.1,NM_116561.1,NM_116428.2, 5
480 301 NC_003071:17070657-17070740:-1	GTTGTTTTGATGGTGGGAGTCTACGCCGTGTTATGGGGCAAACATGTAGATGATGACGGCGAAGAAACACGCCATGAAGATAAC	ACGGCGAAGAAACACGCCAT 0.288696 0	exon_sense,cds_sense, NM_104776.2,NM_117129.2,NM_106587.2, 2
481 302 NC_003071:18983688-18983775:-1	GGTTGTGGAACTGAAATCGCTGGATTTTGGGGTTTTCTGGTAAGAGGGTCTCCAGGATGAATCCGGCGAATTTTCAGCCTCCAAATCC	GAATCCGGCGAATTTTCAGC 0.0882414 0	exon_sense,cds_sense, NM_102103.2,NM_127149.2,NM_106379.3,NM_105083.1, 5
482 303 NC_003071:19062964-19063087:-1	GTTCTTACTCATTCCCTGAGTTGATCCTCATTGGTTGGAAATTAGCAGGTGCAGGGACTCCATTAACCACATGGCAGCTTGACATTCCACAGCTCATAGGATCAAGATGGGGATGACCTTGAGC	TAGGATCAAGATGGGGATGA 0.249255 0	cds_antisense,exon_antisense, NM_130206.1,NM_118249.3,NM_180832.1,NM_102026.1,NM_124470.2,NM_126484.3, 2
483 304 NC_003071:19527821-19527935:-1	TGGGTGAAGAGCTCATGTTGGAGAAGTTAAGTACGTGCAAATAAGCAAATGAGACGGATTTCGTGTTTGTTGGTTTGCACGTGCCCTGCTTCTCCAACATGGAGATTCTCACCCG	TCTCCAACATGGAGATTCTCACC 0.066439 0	igr_sense, NM_126091.2,NM_112030.1,NM_118690.2,NM_112821.4,NM_100497.2,NM_179831.1,NM_112172.1,NM_118702.2,NM_113436.2,NM_118320.2,NM_100506.3,NM_123297.1,NM_114275.1,NM_124609.2,NM_123829.2,NM_111658.3, 9
484 305 NC_003071:19527822-19527934:-1	GGGTGAAGAGCTCATGTTGGAGAAGTTAAGTACGTGCAAATAAGCAAATGAGACGGATTTCGTGTTTGTTGGTTTGCACGTGCCCTGCTTCTCCAACATGGAGATTCTCACCC	CTTCTCCAACATGGAGATTC 0.154014 1	igr_sense, NM_112030.1,NM_130054.1,NM_179825.1,NM_129307.3,NM_118068.1,NM_113436.2,NM_115015.1,NM_101186.3,NM_115899.2,NM_112606.1, 3
485 306 NC_003074:575071-575197:-1	CTTGTGGAGGAAGCAAGATGATGTGCTTACTTGTGGAATTTTTGTTATGTGAGTGAATACGATGAATATATTTTAAGGGCCCTATATTTCCACAACCAAGCACATCCTCTTGCTTCCTCTCCACAAG	AAGCACATCCTCTTGCTTCC 1.38214 1	igr_sense, NM_104719.1,NM_102349.2,NM_102861.2,NM_125049.2,NM_101769.3,NM_111138.2,NM_104725.1,NM_104722.1,NM_179141.1,NM_104721.1,NM_119167.2,NM_127321.2, 4
486 307 NC_003074:829513-829776:-1	CAACGCCACGAGAGCTCAAGCCTCTCTCCGACATAGACGACCAACAAGGACTAAGATTTCAAATTCCAGTTATTTTTTTCTATAGACCTAACCTTTCAAGTGATCTTGATCCGGTCCAGGTGATAAAGAAAGCCCTCGCCGATGCGCTGGTTTACTACTATCCGTTCGCTGGTAGGCTCCGGGAACTTTCAAACCGGAAACTCGCGGTGGACTGCACCGGTGAAGGCGTTTTGTTCATCGAGGCTGAAGCTGACGTGGCGCTTG	GAGGCTGAAGCTGACGTGGC 0.273011 1	exon_sense,cds_sense, NM_116195.3,NM_130144.3,NM_202756.1,NM_125909.1,NM_106311.1, 5
487 308 NC_003074:2246191-2246288:-1	TTTGTGAATTCACATGCTTGCAGCCATCAGCAGCCCACGATGACTTTAAAGACGTATTAAGGAGATTGCCGCTGGCTGCAGAGAGTTTGGATTCTAGA	GGCTGCAGAGAGTTTGGATTC 0.158385 1	exon_sense,cds_sense, NM_117881.3,NM_180505.1,NM_147975.1,NM_127618.2,NM_124228.2,NM_202502.1,NM_118302.2,NM_180504.1,NM_121707.2,NM_100628.1,NM_122708.1, 5
488 50 ath-MIR158a NC_003074:3366336-3366435:-1	ACACGTCATCTCTGTGCTTCTTTGTCTACAATTTTGGAAAAAGTGATGACGCCATTGCTCTTTCCCAAATGTAGACAAAGCAATACCGTGATGATGTCGT	TCCCAAATGTAGACAAAGCA 1	igr_sense, NM_202354.1,NM_111229.2,NM_111619.3,NM_125494.2,NM_105083.1,NM_100775.2,NM_105053.3, 6
489 309 NC_003074:3422956-3423068:-1	AGGTTCTGTGTTGTGATGTTTCTTATATTTTTGGTCTTTGTTTTGTTTTCTCAGGTATGAACTATACATTGATAAGAGATGAACTTATAGTTGGGTCACAGCCACAGAAACCT	TATAGTTGGGTCACAGCCAC 0.0210282 1	exon_sense,cds_sense, NM_201930.1,NM_112718.1,NM_180020.1, 3
490 310 NC_003074:3599783-3599913:-1	GCTACTGTTCGCTGTTGGAGCATCATCAAGATTCACAAATCATCAAGTATTCGTGTAAATAAACCCATTTATGATTAGATTTTTGATGTATGTATGAGAATCTTGATGATGCTGCAGCTGCAATCAGTGGC	TTGATGATGCTGCAGCTGCA 0.297212 1	igr_sense, NM_130165.2,NM_179349.1,NM_115013.1,NM_123063.1,NM_180914.1,NM_104828.1,NM_116132.1,NM_102276.2,NM_201966.1,NM_117588.2,NM_202825.1,NM_111242.2,NM_126060.1,NM_125602.2,NM_101605.3,NM_179713.1,NM_127939.2,NM_202180.1,NM_125503.1,NM_102126.2,NM_101446.2,NM_128279.3,NM_106659.1,NM_116570.3,NM_111615.3,NM_121250.2,NM_202134.1,NM_102338.2,NM_125504.1,NM_147877.2,NM_202135.1,NM_101792.2,NM_2…
491 30 ath-MIR172c NC_003074:3599783-3599913:-1	GCTACTGTTCGCTGTTGGAGCATCATCAAGATTCACAAATCATCAAGTATTCGTGTAAATAAACCCATTTATGATTAGATTTTTGATGTATGTATGAGAATCTTGATGATGCTGCAGCTGCAATCAGTGGC	TGAGAATCTTGATGATGCTGCAGC 0.510686 1	igr_sense, HASH(0xd68acac) NM_179982.1,NM_201823.1,NM_120453.2,NM_123540.3,NM_180786.1,NM_179308.2,NM_101013.1,NM_112759.3,NM_101959.1,NM_130229.1,NM_111656.2,NM_126801.1,NM_101311.3,NM_128230.2,NM_102673.4,NM_124799.2,NM_121293.2,NM_201824.1,NM_124830.3,NM_119856.2,NM_128415.2,NM_125504.1,NM_126118.2,NM_180132.1,NM_119670.2,NM_102967.2,NM_111737.3,NM_121961.1,NM_105956.1,NM_123783.2,NM_116414.3,…
492 311 NC_003074:3838724-3838788:-1	CGAAACGACGTCGTTTTGAAACATCGTTTTGGACGTTTTGGAGCTTCCAAAACGACGTCGTTTCG	AGCTTCCAAAACGACGTCGT 0.0297289 0	repeat_sense,igr_sense, NM_124409.2,NM_127844.1,NM_121402.2,NM_125300.2,NM_114630.3,NM_115354.2,NM_180870.1,NM_120853.2,NM_202707.1,NM_100589.2,NM_125100.2,NM_125297.2, 20
493 312 NC_003074:5051906-5052026:-1	CTGTGGGGGTGCTCCTCCGTATTGAGGTGGTGGTACTGCTCCATATTGAGGTGGTGGTCCTCCTCCATAGTTTGGTGGTGGTGCTCCTCCCATGTTGTTTGCTGGTGGTGCTCCTCCATAG	TGCTGGTGGTGCTCCTCCAT 0.0131311 0	cds_antisense,exon_antisense, NM_112362.2,NM_120857.1,NM_128693.3,NM_112612.2,NM_129462.2,NM_121997.2,NM_114284.2,NM_121239.3, 10
494 313 NC_003074:5914569-5914662:-1	TTTCTCAACGGCGAAGAAATCGTCGGATGTCGCATCCACTTCAAAGAAACCGTTGGGAGTCGCATCTCCGGTGATTTCTTCGCCGTCGATGGAG	CTCCGGTGATTTCTTCGCCG 0.423026 0	igr_sense, NM_121555.2,NM_105021.2,NM_123886.1,NM_105042.3,NM_127976.2,NM_202351.1,NM_126332.2,NM_101662.2,NM_117483.3,NM_101663.1, 8
495 314 NC_003074:7304495-7304559:-1	ACCACCACCATGGTTTGGCTGGAGGAGGTGGATACACTTTTCCATATTTAGAAGGTGGTGGTGGT	CATATTTAGAAGGTGGTGGTG 0.0239664 0	cds_antisense,exon_antisense, NM_112238.2,NM_123676.2,NM_124400.2,NM_113795.2,NM_121985.1,NM_127241.4,NM_103832.1,NM_102389.1,NM_121986.1, 7
496 315 NC_003074:8984591-8984694:-1	TTTTCGAAGTCCCAGATAGAATCTCTTCTACCAAATCCTACGAAAGATCAGAGATGATCGTCATTTTTTTTTGGTGGAAGAGATACTCTCTAGGACTTCGAGAA	TGGAAGAGATACTCTCTAGG 0.0713054 1	igr_sense, NM_128363.2, 17
497 316 NC_003074:10708009-10708159:-1	CTCTAGATCTCAACAGGTTTCCTCCTCCTTCTTTCTATTTAGCTACTTGGTTTCAATTGTTTCAAGCCTAGGTAAGCATATGTAAAAAAGAGACAATTGAAACCAAGTAACTAAATAGAAAGAAGGAGGAACAACCTGTTGAGATCTAGAG	AAGAAGGAGGAACAACCTGTTG 0.132002 1	igr_sense, NM_125206.2,NM_103013.2,NM_122338.1,NM_119138.1,NM_180620.2,NM_104623.2,NM_128017.1,NM_114799.2,NM_113374.1,NM_129981.2,NM_102187.3,NM_112813.1,NM_125039.2,NM_111778.2,NM_124196.2,NM_129713.2, 11
498 317 NC_003074:11416899-11417014:-1	GGGTCGGGTTTGGGTCAGGTATTTTGGGTTCGAGTTTTTCGGGTTTAGAAATTTAAGACCCGTTCTATATATAAATAAACCCAAACTCGAACCCGAACCTGAACCGAATCCGACCC	TCGAACCCGAACCTGAACCGA 0.606912 0	repeat_sense,igr_sense, NM_105504.2,NM_103844.1,NM_147302.1,NM_124865.2,NM_126277.1,NM_128727.1,NM_106247.2,NM_121587.2,NM_117938.2,NM_116317.2,NM_121416.2,NM_124832.1,NM_102123.2,NM_113634.2,NM_104286.2,NM_125129.1,NM_112294.3, 57
499 318 NC_003074:11416902-11417011:-1	TCGGGTTTGGGTCAGGTATTTTGGGTTCGAGTTTTTCGGGTTTAGAAATTTAAGACCCGTTCTATATATAAATAAACCCAAACTCGAACCCGAACCTGAACCGAATCCGA	AACTCGAACCCGAACCTGAA 0.298161 0	repeat_sense,igr_sense, NM_105504.2,NM_128278.1,NM_129366.1,NM_106247.2,NM_113634.2,NM_118341.2,NM_111156.2,NM_112294.3, 66
500 38 NC_003074:11496030-11496141:-1	GGGCTCGGTGTCGAGCGACACCAACTGGGTGTCGATCGACACCATCGGGAGCAGCACGCAAATGCAATAGGTGTCGAACGACACAACAGAGGTGTCGATCGACACCAACACC	GAGGTGTCGATCGACACCAAC 0.124694 0	repeat_sense,igr_sense, NM_114016.1,NM_126896.1,NM_126950.1,NM_147252.1,NM_148529.1,NM_114074.1,NM_114079.1,NM_201961.1,NM_114102.1,NM_148522.1,NM_122848.1,NM_126918.1, 555
501 24 NC_003074:11555939-11556017:-1	GCAGACCACTCGACCCCCTGGTCGAGTAGAGGACATCACCACTTCACCTCACCACTCGACCACGAGGTCGAGTGTCTTC	CCACTCGACCACGAGGTCGAGTGT 1.05113 0	repeat_sense,igr_sense, NM_122820.1,NM_117954.1,NM_126793.1,NM_103358.1,NM_113671.2,NM_180584.1,NM_116794.1,NM_113972.1,NM_201705.1,NM_148798.1,NM_148247.1,NM_122819.1,NM_103339.1,NM_122890.1,NM_103391.1,NM_148526.1,NM_147956.1,NM_114067.1,NM_126888.1,NM_201713.1,NM_148782.1,NM_180576.1,NM_179436.1,NM_100205.3,NM_116802.1,NM_126833.1,NM_147987.1,NM_114100.1,NM_103342.1,NM_147971.1,NM_202235.1,NM_…
502 24 NC_003074:11902815-11903010:-1	ATGATACTCGACCAGGGGGTTGAGTGATGTGGTAGAGTGAATGGCCGAGTGATGGTCAAGTGGTGTGGTGTAGTGATACTCGACCATGGGGTCGAGTGGTGTCATCGAGTGGCCTGAGCTATGGTTACTCGACCACGGGGTCGAGTAGATTGGAAGAATGGCTCCAATGTCACTCGACCAGGGGGTCGAGTATGGT	TCACTCGACCAGGGGGTCGAGTA 0.285786 0	repeat_sense,igr_sense, NM_126793.1,NM_103358.1,NM_122817.1,NM_180584.1,NM_116794.1,NM_113972.1,NM_201705.1,NM_148798.1,NM_148247.1,NM_103339.1,NM_122890.1,NM_119847.2,NM_103391.1,NM_148526.1,NM_147956.1,NM_126888.1,NM_201713.1,NM_148782.1,NM_180576.1,NM_179436.1,NM_122815.1,NM_116802.1,NM_126833.1,NM_147987.1,NM_103342.1,NM_147971.1,NM_202235.1,NM_126781.1,NM_122822.1,NM_122889.1,NM_113973.1,NM_…
503 24 NC_003074:11902903-11903017:-1	TTGAGTGATGATACTCGACCAGGGGGTTGAGTGATGTGGTAGAGTGAATGGCCGAGTGATGGTCAAGTGGTGTGGTGTAGTGATACTCGACCATGGGGTCGAGTGGTGTCATCGA	TACTCGACCATGGGGTCGAGTGGTG 0.544676 0	repeat_sense,igr_sense, NM_202974.1,NM_126793.1,NM_103358.1,NM_180584.1,NM_116794.1,NM_113972.1,NM_201705.1,NM_148798.1,NM_148247.1,NM_103339.1,NM_122890.1,NM_120797.1,NM_103391.1,NM_202830.1,NM_148526.1,NM_119977.3,NM_147956.1,NM_114067.1,NM_126888.1,NM_201713.1,NM_148782.1,NM_180576.1,NM_179436.1,NM_116802.1,NM_126833.1,NM_147987.1,NM_103342.1,NM_147971.1,NM_202235.1,NM_126781.1,NM_122822.1,NM_…
504 24 NC_003074:11902905-11903011:-1	GATGATACTCGACCAGGGGGTTGAGTGATGTGGTAGAGTGAATGGCCGAGTGATGGTCAAGTGGTGTGGTGTAGTGATACTCGACCATGGGGTCGAGTGGTGTCATC	TACTCGACCATGGGGTCGAGT 0.605168 0	repeat_sense,igr_sense, NM_202974.1,NM_126793.1,NM_103358.1,NM_180584.1,NM_116794.1,NM_201705.1,NM_148798.1,NM_148247.1,NM_103339.1,NM_122890.1,NM_103391.1,NM_148526.1,NM_119977.3,NM_147956.1,NM_114067.1,NM_126888.1,NM_201713.1,NM_148782.1,NM_180576.1,NM_179436.1,NM_116802.1,NM_126833.1,NM_147987.1,NM_103342.1,NM_147971.1,NM_202235.1,NM_126781.1,NM_122822.1,NM_122889.1,NM_122828.1,NM_113973.1,NM_…
505 319 NC_003074:12002619-12002726:-1	TTATCCGTATCCGGAACCGATCCGAAAAAACGATTATCCGAGATTTCCGGATCCAGATACGGATAACGAAATTACGGATCCGACGGATCCGGATCCGGATGCGGATAA	ACGGATCCGGATCCGGATGC 0.628278 1	igr_sense, NM_111488.1,NM_122605.1,NM_124961.1,NM_127392.1,NM_180177.1,NM_125388.2,NM_100039.1,NM_180898.1,NM_124558.1,NM_202244.1,NM_114861.2,NM_111258.3,NM_118496.2,NM_104150.2,NM_125365.2,NM_129624.4,NM_115413.3,NM_105372.2, 17
506 24 NC_003074:12075733-12075857:-1	GGTGGTACTCGACCATGTGGTCGAGTGGTGATGTGGAGTGATGAGGCCTTCTACTCGACCAGGGGGTCGAGTGGTTGTTGAAGGAGTGGAGCCATCTACTCGACCAGTGGGTCGAGTGTTCTGCT	CTACTCGACCAGTGGGTCGAGTGT 1.22548 1	repeat_sense,igr_sense, NM_122820.1,NM_126793.1,NM_103358.1,NM_180584.1,NM_116794.1,NM_113972.1,NM_201705.1,NM_148798.1,NM_148247.1,NM_103339.1,NM_122890.1,NM_119847.2,NM_103391.1,NM_148526.1,NM_147956.1,NM_126888.1,NM_201713.1,NM_148782.1,NM_180576.1,NM_179436.1,NM_116802.1,NM_126833.1,NM_147987.1,NM_103342.1,NM_147971.1,NM_202235.1,NM_126781.1,NM_122822.1,NM_122889.1,NM_103402.1,NM_113973.1,NM_…
507 24 NC_003074:12227984-12228060:-1	GAGACCACTCGACCAACAGGTCGAGTAGAGGACATCACCAATTCAACCACCACTCGACCCCGAGGTCGAGTGCCATC	CCACTCGACCCCGAGGTCGAGTG 0.352611 0	repeat_sense,igr_sense, NM_122820.1,NM_126793.1,NM_130345.2,NM_103358.1,NM_113671.2,NM_180584.1,NM_116794.1,NM_113972.1,NM_201705.1,NM_148798.1,NM_148247.1,NM_122819.1,NM_103339.1,NM_122890.1,NM_103391.1,NM_126651.1,NM_148526.1,NM_147956.1,NM_114067.1,NM_126888.1,NM_148782.1,NM_180576.1,NM_179436.1,NM_100205.3,NM_116802.1,NM_114441.1,NM_126833.1,NM_147987.1,NM_114100.1,NM_103342.1,NM_147971.1,NM_…
508 24 NC_003074:12247758-12247835:-1	GAGACCACTCGACCCACAGGTCGAGCAGAGGACATCACCACTTCACTTCACCACTCGACCACGAGATCGAGTGCCCTC	CACTCGACCACGAGATCGAGTG 0.0390796 0	exon_sense,repeat_sense,cds_sense, NM_125310.1,NM_104602.1,NM_123831.1,NM_126793.1,NM_103358.1,NM_122817.1,NM_180584.1,NM_116794.1,NM_201705.1,NM_148798.1,NM_118111.1,NM_148247.1,NM_100472.1,NM_122819.1,NM_103339.1,NM_122890.1,NM_103391.1,NM_148526.1,NM_147956.1,NM_126888.1,NM_148782.1,NM_179734.1,NM_180576.1,NM_179436.1,NM_122815.1,NM_116802.1,NM_126833.1,NM_147987.1,NM_147971.1,NM_202235.1,NM_1…
509 24 NC_003074:12257437-12257514:-1	GAGACCACTCGACCCACAGGTCGAGCAGAGGACATCACCACTTCACTTCACCACTCGACCACGAGGTCGAGTGCCCTC	CCACTCGACCACGAGGTCGAGTGC 0.401262 0	exon_sense,repeat_sense,cds_sense, NM_122820.1,NM_117954.1,NM_126793.1,NM_103358.1,NM_113671.2,NM_180584.1,NM_116794.1,NM_113972.1,NM_201705.1,NM_148798.1,NM_148247.1,NM_122819.1,NM_103339.1,NM_122890.1,NM_103391.1,NM_148526.1,NM_147956.1,NM_114067.1,NM_126888.1,NM_201713.1,NM_148782.1,NM_180576.1,NM_179436.1,NM_100205.3,NM_116802.1,NM_126833.1,NM_147987.1,NM_114100.1,NM_103342.1,NM_147971.1,NM_2…
510 24 NC_003074:12540709-12540783:-1	AGACACTCGACCTCGGGGTCGAGTGATGTGGTGAAGTAGTGATGTCCTCTACTCGACCAGGGGGTCGAGTGATCT	TACTCGACCAGGGGGTCGAGTGAT 0.779579 0	repeat_sense,igr_sense, NM_126793.1,NM_103358.1,NM_147281.1,NM_122817.1,NM_180584.1,NM_116794.1,NM_113972.1,NM_201705.1,NM_148798.1,NM_148247.1,NM_103339.1,NM_122890.1,NM_119847.2,NM_103391.1,NM_148526.1,NM_147956.1,NM_126888.1,NM_201713.1,NM_148782.1,NM_180576.1,NM_179436.1,NM_122815.1,NM_116802.1,NM_126833.1,NM_147987.1,NM_103342.1,NM_147971.1,NM_202235.1,NM_126781.1,NM_122822.1,NM_122889.1,NM_…
511 24 NC_003074:12724701-12724831:-1	TGATGATACTCGACCATGGGATTGAGTGGATGTGATCGAGTGACTCTCATGGTGGTACTCGACCAGGGGGTCGAGTGGTGACGTGAAGTGATGAGGTCTTCTACTCGACCAGGGGGTTGAGTGGTTTGTTA	TCTACTCGACCAGGGGGTTGAGTG 0.339023 0	repeat_sense,igr_sense, NM_202974.1,NM_126793.1,NM_103358.1,NM_180584.1,NM_116794.1,NM_113972.1,NM_201705.1,NM_148798.1,NM_148247.1,NM_103339.1,NM_103391.1,NM_148526.1,NM_119977.3,NM_147956.1,NM_201713.1,NM_148782.1,NM_179436.1,NM_116802.1,NM_126833.1,NM_147987.1,NM_103342.1,NM_202235.1,NM_126781.1,NM_122822.1,NM_113973.1,NM_179432.1,NM_122821.1,NM_126773.1,NM_147965.1, 632
512 24 NC_003074:12994629-12994824:-1	GGTGATACTCGACTTCCAGGTAGAGTGATGAGGTCGAGTAGTGGTCTGGCAATGGGATGAAGACACTCGACCTCTGGGTCGAGTGATGTGATCGAGTGGTGGTCAGGAGATGGAGATGAAGACACTCGACCTGGTGGTCGAGTGGTGAGGTGAAGTGGTGATGTCTTCTACTCGACCTGGGGGTCGAGTGGTCTCT	ACTCGACCTGGGGGTCGAGT 0.0221335 1	repeat_sense,igr_sense, NM_126793.1,NM_122830.1,NM_103358.1,NM_180584.1,NM_116794.1,NM_113972.1,NM_201705.1,NM_148798.1,NM_148247.1,NM_122819.1,NM_103339.1,NM_103391.1,NM_148526.1,NM_147956.1,NM_126888.1,NM_201713.1,NM_148782.1,NM_179436.1,NM_116802.1,NM_126833.1,NM_147987.1,NM_103342.1,NM_202235.1,NM_126781.1,NM_122822.1,NM_113973.1,NM_179432.1,NM_122821.1,NM_126773.1,NM_147965.1, 1064
513 24 NC_003074:13383878-13383956:-1	GCAGACCACTCGACCCCCTGGTCGAGTAGAGGACATCACCACTTCACCTCATCACTCGACCCCGAGGTCGAGTGTCTCC	TCACTCGACCCCGAGGTCGAGTGTCT 0.234718 0	repeat_sense,igr_sense, NM_122820.1,NM_126793.1,NM_130345.2,NM_103358.1,NM_113671.2,NM_180584.1,NM_116794.1,NM_113972.1,NM_201705.1,NM_148798.1,NM_148247.1,NM_122819.1,NM_103339.1,NM_122890.1,NM_103391.1,NM_126651.1,NM_148526.1,NM_147956.1,NM_114067.1,NM_126888.1,NM_148782.1,NM_180576.1,NM_179436.1,NM_100205.3,NM_116802.1,NM_114441.1,NM_126833.1,NM_147987.1,NM_114100.1,NM_103342.1,NM_147971.1,NM_…
514 24 NC_003074:13383881-13383953:-1	GACCACTCGACCCCCTGGTCGAGTAGAGGACATCACCACTTCACCTCATCACTCGACCCCGAGGTCGAGTGTC	CACTCGACCCCGAGGTCGAGT 0.394493 0	repeat_sense,igr_sense, NM_122820.1,NM_126793.1,NM_103358.1,NM_113671.2,NM_180584.1,NM_116794.1,NM_113972.1,NM_201705.1,NM_148798.1,NM_148247.1,NM_122819.1,NM_103339.1,NM_122890.1,NM_103391.1,NM_126651.1,NM_148526.1,NM_147956.1,NM_114067.1,NM_126888.1,NM_148782.1,NM_180576.1,NM_179436.1,NM_100205.3,NM_116802.1,NM_114441.1,NM_126833.1,NM_147987.1,NM_114100.1,NM_103342.1,NM_147971.1,NM_202235.1,NM_…
515 24 NC_003074:13408326-13408438:-1	CACTCGACCCAGAGGTCGAGTAGGAGCTTCGAGATCTCAAGAGATCACTCGACCCCCAGGTCGAGTAGAAGACATCACCACTTCACCTCACCACTCGACCTCGAGGTCGAGCG	CCACTCGACCTCGAGGTCGAG 0.342348 0	repeat_sense,igr_sense, NM_122820.1,NM_202029.1,NM_122830.1,NM_103358.1,NM_113671.2,NM_180584.1,NM_116794.1,NM_113972.1,NM_148798.1,NM_148247.1,NM_122819.1,NM_103339.1,NM_122890.1,NM_103391.1,NM_148526.1,NM_147956.1,NM_114067.1,NM_126888.1,NM_148782.1,NM_180576.1,NM_179436.1,NM_116802.1,NM_126833.1,NM_147987.1,NM_103342.1,NM_147971.1,NM_202235.1,NM_126781.1,NM_122822.1,NM_122889.1,NM_113973.1,NM_…
516 24 NC_003074:13616052-13616124:-1	GACCACTCGACCCCCTGGTCGAGTAGAGGACTTCACCACTTCACCTCACCACTCGACCCCCTGGTCGAGTCTC	CCACTCGACCCCCTGGTCGAGT 0.178619 0	repeat_sense,igr_sense, NM_122820.1,NM_103358.1,NM_180584.1,NM_116794.1,NM_113972.1,NM_201705.1,NM_148798.1,NM_122819.1,NM_103339.1,NM_122890.1,NM_103391.1,NM_114067.1,NM_126888.1,NM_148782.1,NM_180576.1,NM_116802.1,NM_126833.1,NM_147987.1,NM_114100.1,NM_103342.1,NM_147971.1,NM_148010.1,NM_202235.1,NM_126781.1,NM_122822.1,NM_122889.1,NM_103402.1,NM_113973.1,NM_179432.1,NM_147959.1,NM_122821.1,NM_…
517 24 NC_003074:13662824-13662898:-1	AGATCACTCGACCCCCTGGTCGAGTAGAGGACATCACTACTTCACCACATCACTCGACCACGAGGTCGAGTGTCT	TCACTCGACCACGAGGTCGAGTGT 0.956987 0	repeat_sense,igr_sense, NM_122820.1,NM_117954.1,NM_126793.1,NM_103358.1,NM_113671.2,NM_180584.1,NM_116794.1,NM_113972.1,NM_201705.1,NM_148798.1,NM_148247.1,NM_122819.1,NM_103339.1,NM_122890.1,NM_103391.1,NM_148526.1,NM_147956.1,NM_114067.1,NM_126888.1,NM_201713.1,NM_148782.1,NM_180576.1,NM_179436.1,NM_100205.3,NM_116802.1,NM_126833.1,NM_147987.1,NM_114100.1,NM_103342.1,NM_147971.1,NM_202235.1,NM_…
518 24 NC_003074:13685133-13685295:-1	GAAGACATACTCGACCACCAGGTCGTGTGCATCCAGCACCATACTCGACCCCCTGGTCGAGTGACTTTGGAGCCATTCTTCCCATCTACTCGACCCCCTAGTCGAGTATCCTCAGCTCAGGCTACTCGATGACGCCATCGACCCCCTGGTCGAGTATCACTTC	TCGACCCCCTGGTCGAGTAT 0.129008 1	repeat_sense,igr_sense, NM_122820.1,NM_122890.1,NM_114067.1,NM_180576.1,NM_114100.1,NM_147971.1,NM_122822.1,NM_122889.1,NM_103402.1,NM_147959.1,NM_122821.1,NM_180578.1, 551
519 24 NC_003074:13925005-13925133:-1	GATGAAGACGCTCGACTTCGTGGTCGAGTGTTGAGGTGAAGTTGTGATGTCTTCTACTCGACCTGGGGTTCGAGTGGTCTCTTGAGATCTTGAAGCTCCTACTCGACCTCTGGGTTGAGTGGTTTTGTC	TACTCGACCTCTGGGTTGAGTG 0.247474 0	repeat_sense,igr_sense, NM_103358.1,NM_180584.1,NM_116794.1,NM_113972.1,NM_148798.1,NM_148247.1,NM_103391.1,NM_148526.1,NM_147956.1,NM_126888.1,NM_201713.1,NM_179436.1,NM_116802.1,NM_126833.1,NM_147987.1,NM_103342.1,NM_202235.1,NM_126781.1,NM_122828.1,NM_113973.1,NM_179432.1,NM_126773.1,NM_147965.1, 224
520 24 NC_003074:13925051-13925308:-1	AGGTGAAGACACTCGGCCTCGGGGTCGAGTGATGGATCGAGTGATGGTCAGGTGATGGGATGAAGACACTCGACCTCGGGGTCGAGTGATGTGATCGAGTGATGGTCAGGTGATGGGATGAAGACACTCGACCTCGGGGTCGAGTGATGTGATCGAGTGATGGTCAGGTGATGGAGATGAAGACGCTCGACTTCGTGGTCGAGTGTTGAGGTGAAGTTGTGATGTCTTCTACTCGACCTGGGGTTCGAGTGGTCTCTT	TACTCGACCTGGGGTTCGAGT 0.103569 0	repeat_sense,igr_sense, NM_126793.1,NM_103358.1,NM_180584.1,NM_116794.1,NM_113972.1,NM_201705.1,NM_148798.1,NM_148247.1,NM_103339.1,NM_103391.1,NM_148526.1,NM_147956.1,NM_126888.1,NM_148782.1,NM_179436.1,NM_116802.1,NM_126833.1,NM_147987.1,NM_103342.1,NM_202235.1,NM_126781.1,NM_113973.1,NM_179432.1,NM_126773.1,NM_147965.1, 757
521 88 NC_003074:13925089-13925315:-1	GCAATGAAGGTGAAGACACTCGGCCTCGGGGTCGAGTGATGGATCGAGTGATGGTCAGGTGATGGGATGAAGACACTCGACCTCGGGGTCGAGTGATGTGATCGAGTGATGGTCAGGTGATGGGATGAAGACACTCGACCTCGGGGTCGAGTGATGTGATCGAGTGATGGTCAGGTGATGGAGATGAAGACGCTCGACTTCGTGGTCGAGTGTTGAGGTGAAGTTGT	TCGTGGTCGAGTGTTGAGGTGAAGT 0.704788 0	repeat_sense,igr_sense, NM_126793.1,NM_116794.1,NM_113972.1,NM_103389.1,NM_102091.1,NM_103391.1,NM_126888.1,NM_126833.1,NM_147987.1,NM_103342.1,NM_112562.3,NM_202235.1,NM_126781.1,NM_119246.2,NM_113973.1,NM_179432.1,NM_126773.1,NM_147965.1, 119
522 24 NC_003074:13925213-13925307:-1	GGTGAAGACACTCGGCCTCGGGGTCGAGTGATGGATCGAGTGATGGTCAGGTGATGGGATGAAGACACTCGACCTCGGGGTCGAGTGATGTGATC	CACTCGACCTCGGGGTCGAGTGATG 0.512456 0	repeat_sense,igr_sense, NM_122820.1,NM_118048.1,NM_122997.1,NM_126793.1,NM_103358.1,NM_113671.2,NM_180584.1,NM_116794.1,NM_113972.1,NM_201705.1,NM_148798.1,NM_148247.1,NM_122819.1,NM_103339.1,NM_122890.1,NM_103391.1,NM_148526.1,NM_147956.1,NM_114067.1,NM_126888.1,NM_148782.1,NM_180576.1,NM_201718.1,NM_179436.1,NM_116802.1,NM_126833.1,NM_147987.1,NM_103342.1,NM_147971.1,NM_103206.1,NM_202235.1,NM_…
523 24 NC_003074:13925213-13925307:-1	GGTGAAGACACTCGGCCTCGGGGTCGAGTGATGGATCGAGTGATGGTCAGGTGATGGGATGAAGACACTCGACCTCGGGGTCGAGTGATGTGATC	CACTCGACCTCGGGGTCGAGT 0.476113 0	repeat_sense,igr_sense, NM_122820.1,NM_118048.1,NM_122997.1,NM_126793.1,NM_103358.1,NM_113671.2,NM_180584.1,NM_116794.1,NM_113972.1,NM_201705.1,NM_148798.1,NM_148247.1,NM_122819.1,NM_103339.1,NM_122890.1,NM_103391.1,NM_148526.1,NM_147956.1,NM_114067.1,NM_126888.1,NM_148782.1,NM_180576.1,NM_201718.1,NM_179436.1,NM_116802.1,NM_126833.1,NM_147987.1,NM_103342.1,NM_147971.1,NM_103206.1,NM_202235.1,NM_…
524 24 NC_003074:13977582-13977715:-1	GACGGGATGATACTCGACCAGGGGGTCGAGTAATGTGATCGAGTGGTAGTCCTGGTCGTACTCGACCATGTGGGTCAAGTTGTGACGTGGAGTGCTGAGGTCTTCTACTCGACCAGGGGGTCGAGTGGTCTGTT	TACTCGACCAGGGGGTCGAGT 0.105364 0	repeat_sense,igr_sense, NM_126793.1,NM_103358.1,NM_122817.1,NM_180584.1,NM_116794.1,NM_113972.1,NM_201705.1,NM_148798.1,NM_148247.1,NM_103339.1,NM_122890.1,NM_119847.2,NM_103391.1,NM_148526.1,NM_147956.1,NM_126888.1,NM_201713.1,NM_148782.1,NM_180576.1,NM_179436.1,NM_122815.1,NM_116802.1,NM_126833.1,NM_147987.1,NM_103342.1,NM_147971.1,NM_202235.1,NM_126781.1,NM_122822.1,NM_122889.1,NM_113973.1,NM_…
525 24 NC_003074:14015907-14016081:-1	TTGACTGATATACTCGACCAGGGGGTCGAGTAACATTGTAGAGTGAATGGTCGATTGGTGGTGAGTGATGATACTCGACCTGGGGGTCGAGTAATGTGGTAGAGTGAATGGCCGAGTGGTGGTCAGGTGGTGTGACGTAGTGTTACTCGACCACGTGGTCGAGTGGTGTCATCGA	TGTTACTCGACCACGTGGTCGAGTGGTG 0.787466 1	repeat_sense,igr_sense, NM_122820.1,NM_117954.1,NM_126793.1,NM_103358.1,NM_122817.1,NM_180584.1,NM_116794.1,NM_113972.1,NM_201705.1,NM_148798.1,NM_148247.1,NM_122819.1,NM_103339.1,NM_122890.1,NM_103391.1,NM_148526.1,NM_147956.1,NM_114067.1,NM_126888.1,NM_201713.1,NM_148782.1,NM_180576.1,NM_123420.1,NM_179436.1,NM_122815.1,NM_116802.1,NM_126833.1,NM_147987.1,NM_114100.1,NM_103342.1,NM_147971.1,NM_…
526 24 NC_003074:14140001-14140093:-1	GTGGTGATGTCTTCTACTCGACCTGGGGGTCGAGTGGTCTGTTGAGATCTTGAAGCTCCTACTCGACCTCTGGGTCGAGTGGTTTGTCATGAT	TCGACCTCTGGGTCGAGTGGT 0.101882 0	repeat_sense,igr_sense, NM_122820.1,NM_126793.1,NM_103358.1,NM_180584.1,NM_116794.1,NM_113972.1,NM_148798.1,NM_103339.1,NM_103391.1,NM_147956.1,NM_126888.1,NM_148782.1,NM_116802.1,NM_126833.1,NM_147987.1,NM_103342.1,NM_202235.1,NM_126781.1,NM_113973.1,NM_179432.1,NM_126773.1,NM_147965.1, 331
527 24 NC_003074:14155590-14155682:-1	GTGGTGATGTCTTCTACTCGACCTGGGGGTCGAGTGGTCTGTTGAGATCTTGAAGCTCCTACTCGACCTCTGGGTCGAGTGGTTTGTCATGAT	TCGACCTCTGGGTCGAGTGGT 0.101882 0	repeat_sense,igr_sense, NM_122820.1,NM_126793.1,NM_103358.1,NM_180584.1,NM_116794.1,NM_113972.1,NM_148798.1,NM_103339.1,NM_103391.1,NM_147956.1,NM_126888.1,NM_148782.1,NM_116802.1,NM_126833.1,NM_147987.1,NM_103342.1,NM_202235.1,NM_126781.1,NM_113973.1,NM_179432.1,NM_126773.1,NM_147965.1, 331
528 24 NC_003074:14170461-14170543:-1	GATAATGATACTCGACCATGGGGTCGAGTAATGGTGTGAAGTGATGAGGCCATCTACTCGACTAGGTGGTCGAGTGGTGTGTT	TCTACTCGACTAGGTGGTCGAGTGG 0.843295 0	repeat_sense,igr_sense, NM_104588.2,NM_111911.3,NM_126793.1,NM_103358.1,NM_122817.1,NM_180584.1,NM_116794.1,NM_113972.1,NM_201705.1,NM_148798.1,NM_148247.1,NM_123549.1,NM_103339.1,NM_103391.1,NM_148526.1,NM_147956.1,NM_126888.1,NM_201713.1,NM_148782.1,NM_179436.1,NM_122815.1,NM_116802.1,NM_126833.1,NM_147987.1,NM_103342.1,NM_202235.1,NM_126781.1,NM_122822.1,NM_113973.1,NM_179432.1,NM_122821.1,NM_…
529 320 NC_003074:14180484-14180696:-1	CGATTGCTCGATCTTGGGGATCGAGTAAACAGGGTGCTGCAAAGTCTGCGCCTTTGCCTGCATGCTCTGAGTGATCAATTGGTCGAGTAGATGCTTCTTCCTCTCCTATCTGTATGCTTAGATGTCTTGTTGATTGGGGAATGAGGAGGATCCGAAGAGGCTTTGATAGATCAACAAATCTTGTAGAGTAGGTCGCCCTTGGTCGAGTAAATG	GGTCGCCCTTGGTCGAGTAAA 0.0851606 0	repeat_sense,igr_sense, NM_122905.1,NM_148218.1,NM_148255.1,NM_103341.1,NM_111387.2,NM_147289.1, 119
530 56 NC_003074:14205008-14205127:-1	TCGGACCTGGTCGACGAATCCTCGGACCCGGTCGATGAAGTCTCGGACCTGGTCGACGATTTCAACCCCTGGTCGACAAATCCTCGGACCCGGTCGACGATTCCTCGTCCTGGTCGACGA	CGACGATTCCTCGTCCTGGT 0.0762288 1	igr_sense, NM_114184.1,NM_127378.2, 23
531 56 NC_003074:14215417-14215536:-1	TCGGACCTGGTCGACGAATCCTCGGACCCGGTCGATGAAGTCTCGGACCTGGTCGACGATTTCAACCCCTGGTCGACAAATCCTCGGACCCGGTCGACGATTCCTCGTCCTGGTCGACGA	CGACGATTCCTCGTCCTGGT 0.0762288 1	igr_sense, NM_114184.1,NM_127378.2, 23
532 321 NC_003074:14255176-14255336:-1	GCTGGGTGTTGATCGACATGGGATGGGGTGTCAATCGACACCATCTGGAATAATTTCCTTCTCCTCTGTGAAATTGTCGATTCCACTCGACAAAGGCAAAACAGAGTCGTCAAGAGTAATTGGTGTCGATCGACACCCTGATGCATCGATCGACACTGAGT	GACACCCTGATGCATCGATC 0.0615011 1	repeat_sense,igr_sense, NM_103963.1,NM_103957.1,NM_103961.1,NM_125079.1, 22
533 24 NC_003074:14417292-14417387:-1	GGTGAAGACACTCGGCCTCGGGGTCGAGTGATGTGATCGAGTGATTGTCAGGTGATGGGATGAAGACACTCGACCTCGGGGTCGAGTGATGTGATC	CACTCGACCTCGGGGTCGAGTGATGTG 0.665477 1	repeat_sense,igr_sense, NM_122820.1,NM_118048.1,NM_122997.1,NM_126793.1,NM_103358.1,NM_113671.2,NM_180584.1,NM_116794.1,NM_113972.1,NM_201705.1,NM_148798.1,NM_148247.1,NM_122819.1,NM_103339.1,NM_122890.1,NM_103391.1,NM_148526.1,NM_147956.1,NM_114067.1,NM_126888.1,NM_148782.1,NM_180576.1,NM_201718.1,NM_179436.1,NM_116802.1,NM_126833.1,NM_147987.1,NM_126433.3,NM_103342.1,NM_147971.1,NM_103206.1,NM_…
534 24 NC_003074:14417292-14417387:-1	GGTGAAGACACTCGGCCTCGGGGTCGAGTGATGTGATCGAGTGATTGTCAGGTGATGGGATGAAGACACTCGACCTCGGGGTCGAGTGATGTGATC	AAGACACTCGACCTCGGGGTCGAGTGA 0.69407 0	repeat_sense,igr_sense, NM_122820.1,NM_118048.1,NM_122997.1,NM_126793.1,NM_103358.1,NM_113671.2,NM_180584.1,NM_116794.1,NM_113972.1,NM_201705.1,NM_148798.1,NM_148247.1,NM_122819.1,NM_103339.1,NM_122890.1,NM_103391.1,NM_148526.1,NM_147956.1,NM_114067.1,NM_126888.1,NM_148782.1,NM_180576.1,NM_201718.1,NM_179436.1,NM_116802.1,NM_126833.1,NM_147987.1,NM_103342.1,NM_147971.1,NM_103206.1,NM_202235.1,NM_…
535 24 NC_003074:14420875-14421076:-1	AGTGATGATACTCGACCAGGGGGTCGAGTAACTTGGTAGAGTGAATTGTCGAGTGTGGTCAGGTGGTGTGGCGAAGTGATACTCGACCAGGGGGTCGAGTGGCGTCATCGAGTGGCCTGAGCTGGGGATACTCGACCAGGGGGTCGAGTAGGTGGGAAGAATGGCTCCAAAGTTACTCGACTTGGGGGTCGAGTATGGTGCT	GTTACTCGACTTGGGGGTCGAGTATG 0.152356 1	repeat_sense,igr_sense, NM_122905.1,NM_123739.1,NM_126793.1,NM_103358.1,NM_180584.1,NM_116794.1,NM_113972.1,NM_201705.1,NM_148798.1,NM_148247.1,NM_103339.1,NM_103391.1,NM_148526.1,NM_147956.1,NM_126888.1,NM_201713.1,NM_148782.1,NM_179436.1,NM_116802.1,NM_126833.1,NM_147987.1,NM_103342.1,NM_202235.1,NM_126781.1,NM_113973.1,NM_179432.1,NM_126773.1,NM_147965.1, 756
536 24 NC_003074:14420969-14421075:-1	GTGATGATACTCGACCAGGGGGTCGAGTAACTTGGTAGAGTGAATTGTCGAGTGTGGTCAGGTGGTGTGGCGAAGTGATACTCGACCAGGGGGTCGAGTGGCGTCAT	TACTCGACCAGGGGGTCGAGTGG 0.835392 0	repeat_sense,igr_sense, NM_126793.1,NM_103358.1,NM_122817.1,NM_180584.1,NM_116794.1,NM_113972.1,NM_201705.1,NM_148798.1,NM_148247.1,NM_103339.1,NM_122890.1,NM_119847.2,NM_103391.1,NM_148526.1,NM_147956.1,NM_126888.1,NM_201713.1,NM_148782.1,NM_180576.1,NM_179436.1,NM_122815.1,NM_116802.1,NM_126833.1,NM_147987.1,NM_103342.1,NM_147971.1,NM_202235.1,NM_126781.1,NM_122822.1,NM_122889.1,NM_113973.1,NM_…
537 24 NC_003074:14426082-14426177:-1	GGTGAAGACACTCGGCCTCGGGGTGGAGTGATGTGATCGAGTTATTGTCAGGTGATGGGATGAAGACACTCGACCTCGGGGTCGAGTGATGTGATC	TCGACCTCGGGGTCGAGTGATGTG 0.0663325 1	repeat_sense,cds_antisense,exon_antisense, NM_126793.1,NM_103358.1,NM_180584.1,NM_116794.1,NM_113972.1,NM_201705.1,NM_148798.1,NM_148247.1,NM_103391.1,NM_148526.1,NM_147956.1,NM_126888.1,NM_148782.1,NM_180576.1,NM_179436.1,NM_116802.1,NM_126833.1,NM_147987.1,NM_103342.1,NM_126433.3,NM_147971.1,NM_202235.1,NM_126781.1,NM_113973.1,NM_179432.1,NM_147959.1,NM_180578.1,NM_126773.1,NM_147965.1, 579
538 24 NC_003074:14426082-14426177:-1	GGTGAAGACACTCGGCCTCGGGGTGGAGTGATGTGATCGAGTTATTGTCAGGTGATGGGATGAAGACACTCGACCTCGGGGTCGAGTGATGTGATC	AAGACACTCGACCTCGGGGTCGAGTGA 0.550748 1	repeat_sense,cds_antisense,exon_antisense, NM_122820.1,NM_118048.1,NM_122997.1,NM_126793.1,NM_103358.1,NM_113671.2,NM_180584.1,NM_116794.1,NM_113972.1,NM_201705.1,NM_148798.1,NM_148247.1,NM_122819.1,NM_103339.1,NM_122890.1,NM_103391.1,NM_148526.1,NM_147956.1,NM_114067.1,NM_126888.1,NM_148782.1,NM_180576.1,NM_201718.1,NM_179436.1,NM_116802.1,NM_126833.1,NM_147987.1,NM_103342.1,NM_147971.1,NM_10320…
539 38 NC_003074:14554813-14554938:-1	GGTGGTGTCGGTCGACACTATCAATGTGTGTCGAGCGATTCTGGAGATTAATGTCCAGCCTGGTCGATTCTACTTCGTCACAGCCTGATGTCTCGTATATATGCGATGGTGTCGATCGACACTGCC	GCGATGGTGTCGATCGACACTG 0.834636 0	repeat_sense,cds_antisense,exon_antisense, NM_128025.1,NM_114016.1,NM_126896.1,NM_126950.1,NM_116818.1,NM_147252.1,NM_112406.3,NM_114110.1,NM_148529.1,NM_114074.1,NM_114079.1,NM_148282.1,NM_106401.3,NM_122848.1,NM_126918.1, 474
540 24 NC_003074:14805142-14805222:-1	GGTCGTCTACTCGACCAGGGGGTCGAGTGGTGGTGAGAAGAGGTGATGCCATCTACTCGACCAGGGGGTCGAGTGGTGATC	TCTACTCGACCAGGGGGTCGAGTGGT 0.59656 0	repeat_sense,igr_sense, NM_126793.1,NM_103358.1,NM_122817.1,NM_180584.1,NM_116794.1,NM_113972.1,NM_201705.1,NM_148798.1,NM_148247.1,NM_103339.1,NM_122890.1,NM_119847.2,NM_103391.1,NM_148526.1,NM_147956.1,NM_126888.1,NM_201713.1,NM_148782.1,NM_180576.1,NM_179436.1,NM_122815.1,NM_116802.1,NM_126833.1,NM_147987.1,NM_103342.1,NM_147971.1,NM_202235.1,NM_126781.1,NM_122822.1,NM_122889.1,NM_113973.1,NM_…
541 24 NC_003074:14824457-14824583:-1	GTGAAGACACTCGGCCTCGGGGTCGAGTGATGTGGTGAAGTAGTGATGTCCTCTATTCGACCAGGGGGTCGAGTGATCTGTTGAGATCTTGAAGCTTCTACTCGACCTCGGGGTCGAGTGGTTTGAC	TACTCGACCTCGGGGTCGAGTGGT 0.77517 1	repeat_sense,igr_sense, NM_122820.1,NM_126793.1,NM_103358.1,NM_180584.1,NM_116794.1,NM_113972.1,NM_201705.1,NM_148798.1,NM_148247.1,NM_122819.1,NM_103339.1,NM_122890.1,NM_103391.1,NM_148526.1,NM_147956.1,NM_114067.1,NM_126888.1,NM_148782.1,NM_180576.1,NM_201718.1,NM_179436.1,NM_116802.1,NM_126833.1,NM_147987.1,NM_103342.1,NM_147971.1,NM_202235.1,NM_126781.1,NM_122822.1,NM_122889.1,NM_113973.1,NM_…
542 322 NC_003074:15115415-15115530:-1	TAATTTTGCGAGGGAGTTGCTAGGAAGACTCGCAAATCCCTCACAAAGTTGTTTAGGGTTTTCGGCAATTTTGCGAGGAATCTGCGTGCACTCCCAGCAACTCCCTCGCAAATTTA	TCCCAGCAACTCCCTCGCAA 0.624564 1	repeat_sense,igr_sense, NM_111263.2,NM_112790.1, 15
543 24 NC_003074:15163508-15163641:-1	AGACACTCGACCTCGAGGTCGAGTGATGTGATCGAGTGACGGTCAGGTGGTGGAGGTGAATATACTCGACCAGGGGGTCGAGGGGTGAGATGAAGTTGTGAAGTCCCCTACTCGACTAAGGGGTCGAGTGGTCT	TACTCGACTAAGGGGTCGAGTGGT 0.808966 1	repeat_sense,igr_sense, NM_118781.1,NM_126793.1,NM_103358.1,NM_180584.1,NM_116794.1,NM_201705.1,NM_148798.1,NM_148247.1,NM_103339.1,NM_103391.1,NM_122937.2,NM_148526.1,NM_147956.1,NM_148782.1,NM_179436.1,NM_116802.1,NM_126833.1,NM_147987.1,NM_103342.1,NM_202235.1,NM_126781.1,NM_122822.1,NM_122821.1,NM_126773.1,NM_147965.1, 393
544 60 NC_003074:15261824-15261891:-1	CACTCGACCTGGGGGTCGAGTGATGTGATCGAGTGGTGTCAGAAGATACTCGACTTCCAGGTTGAGTG	GATACTCGACTTCCAGGTTGAG 0.434589 0	repeat_sense,igr_sense, NM_122820.1,NM_116794.1,NM_113972.1,NM_148798.1,NM_123224.2,NM_130292.2,NM_147956.1,NM_126888.1,NM_180576.1,NM_147987.1,NM_103342.1,NM_147971.1,NM_126781.1,NM_122828.1,NM_113973.1,NM_147959.1,NM_180578.1,NM_147965.1, 127
545 323 NC_003074:15960591-15960704:-1	AGGAAAGTCCTTTTCTCCTTCACGGCTAGCATCATTTGTAGACTTGCTTTTGGACAAAACTTCCACCAATGCGATTTTGTTGATGCTAGCCGTGAAGGAGAAAAAGACTTTCCT	TGATGCTAGCCGTGAAGGAGAAAA 0.724097 1	exon_sense,cds_sense, NM_126104.1,NM_125799.2,NM_179322.1,NM_116155.1,NM_118065.3,NM_101178.3,NM_126070.2,NM_127197.3,NM_114293.1, 3
546 34 NC_003074:16044822-16044957:-1	GTTGGCGCTGCAGCGCATCAACCCTAACCTACCCGTGGCGTCCAGTTGGTCGAACGCCAAGCGCACCAATAACCTACCTGGTGGGCCAGAAGGGCCCACAGGAGAGAGGTTAGGGTTGATGCGCTGCAGCGCCAAC	AGGTTAGGGTTGATGCGCTG 0.0372599 0	intron_sense, NM_113554.2,NM_114305.1, 20
547 324 NC_003074:16170880-16171002:-1	CTAGTGTTTGAACCTAACGAGCAGTACTTTGTTCCTAACCCTTCTGAGACCGTGTTAGATTAGTAGACAAGTGACAGTCTAACACTAGGTAACAAGGTACTGCTCGTTAGGTTTGAACACTAG	AACAAGGTACTGCTCGTTAGGTT 0.356122 1	igr_sense, NM_113986.1,NM_126972.1,NM_128262.2,NM_117115.2, 3
548 325 NC_003074:17332497-17332572:-1	ATCTACGGCACTCACGCCGTTCACGGCAACAACAACGTCTACGGCAGTTGCCGTGAACGGCGTCAGTGCCATGGAT	CCGTGAACGGCGTCAGTGCCAT 0.528781 1	igr_sense, NM_147836.2,NM_114572.2,NM_114571.1,NM_114568.3,NM_114567.2, 6
549 6 NC_003074:17429924-17430035:-1	AAATATAAACCCTAAATCTCCAAATCGATTTTATTATCTCAAAATCACAGACCCACATTGACTTCAAAATCGCAGATAATAAAATCGATTTGGGGATTTAGGGTTTAAATTT	AAATCGATTTGGGGATTTAGG 0.155112 1	igr_sense, NM_202367.1,NM_122292.2,NM_124328.1,NM_105341.3,NM_100447.2,NM_120980.1,NM_125438.2,NM_122494.2, 47
550 326 NC_003074:17883736-17883850:-1	GGTGAAGACGTAACTAGCTCAGAAGAGTCTGGGAGAAGAAAAGAACGCGGTGATGATAGGTCACATCACTGTGTTCTTATTCACTTGATTCTTCTGAGCTAGCCTCGTCCTCTTC	GATTCTTCTGAGCTAGCCTC 0.580357 1	igr_sense, NM_101860.1,NM_100585.1, 3
551 327 NC_003074:19063848-19063935:-1	TGGAGTTTGAAGAACAAATATGTGGGTAAAAGGCAAAAAGGATGCAGATCAATAATCTTTTACCTACATACTTGTTCGTCAAGCTCCA	ACCTACATACTTGTTCGTCA 0.21962 1	igr_sense, NM_112835.3,NM_119583.2,NM_118260.2,NM_124602.2,NM_102345.3,NM_125108.2,NM_120387.1, 5
552 328 NC_003074:21201230-21201418:-1	ATACGTCCTTAGACCCACAAGCCAATTTCAATTCTGGTTAGATGCATGATTTGTGTTCACAGTGGTTCTTGGAACCATCCATGGCACCTTAAACATTTTAGTCACTAAAGTCGTTTCAATCTTGAAATTTACTGTGAACAAAAGTCATCTAACCATAATTGAACTTGGCTTGTGGGTCTAACGACGTAT	TGAACTTGGCTTGTGGGTCT 0.0473843 1	igr_sense, NM_106505.3,NM_105140.2, 5
553 329 NC_003074:22393621-22393722:-1	GCTAACAGCGGGACTTCATGAGATTGGAGCCGTAGATGATGCATGTGCTCGCGTTTTGCAACTTCAGTTTGAGCTCCAATCTCATGAAGTGCCGTGCATAGC	GCTCCAATCTCATGAAGTGCC 1.0588 0	cds_antisense,exon_antisense, NM_123898.2,NM_202321.1,NM_100320.2,NM_179257.1,NM_111305.3,NM_115920.1,NM_102555.1,NM_113689.1,NM_116939.3,NM_115572.1,NM_101418.3,NM_104676.3, 4
554 330 NC_003074:23154660-23154782:-1	GCGATCGCTTCCGCGATTTTCCCGGCGGATTTGTAAGCGGCGGCGCGGTGCATATAGCAATCAGCGAGGAATCCTTGTGGCGCGGGACGACGACGACCGTCGAGAATTTTGGAGAAGTGACGT	ACCGTCGAGAATTTTGGAGAA 0.126827 1	cds_antisense,exon_antisense, NM_126550.1,NM_120578.2,NM_116122.2, 3
555 122 ath-MIR165b NC_003075:369832-370011:-1	GAAGAGGCTATTTCTGTTGTGGGGAATGTTGTTTGGATCGAGGATATCATAAACGCATACACATGTTTATATGTTATGATGCATTATATGACTGATGTAATGTACATATATATACATACATGCCACATGGTATCGTCGGACCAGGCTTCATCCCCCTCAACATGTTAATTGCCTTCAATC	TCGGACCAGGCTTCATCCCCCTCA 0.369182 1	igr_sense, HASH(0xe23b448) NM_104096.2,NM_115918.2,NM_179464.1,NM_119441.3,NM_129025.2,NM_113158.2,NM_102785.3,NM_125462.2,NM_118877.2,NM_113168.1,NM_202738.1, 11
556 2 NC_003075:1016839-1016946:-1	CGAGGAAGCAGTCTCTCGCAATATTTGCGAGGGATTAGCAACGTTCGTCCGTGGTGTAGTAAAGTACTTGCAATTCCCTCGCAAATTTGCGAGGGATTCGTTCCCTCG	TCGCAAATTTGCGAGGGATT 0.139476 1	repeat_sense,igr_sense, NM_113908.1,NM_123837.2, 164
557 98 NC_003075:1023965-1024096:-1	ACCGTTAACACTCCTTAACAGCGCTCCTAACAGCCGTTACAAAACATGGCCTAACAGCCGTTATCGTTGGTTTAAGGACAAAAACAGTTGTTAGTTACGCTGTTAGGAGAGCTGTTAAGAAGTGTTAATGGT	GTTAGGAGAGCTGTTAAGAAG 0.265487 1	repeat_sense,intron_sense, NM_114951.2,NM_124625.2,NM_128849.1,NM_102048.1, 26
558 331 NC_003075:1180844-1180989:-1	ATCGTTTGAGTTCTTGGTGACAAACCTAAAGCATTTTCCTTTATTATTCTTGCACCTAATAAAGCCCCAATGAGCTATCTTATTTTCAAGCTTTAGGTTTGAAAATGTGAAAAAGCTTTGGGTTTGTCACCAAAGACTCAAATGAT	CTTTGGGTTTGTCACCAAAGA 0.230173 1	igr_sense, NM_117185.3,NM_127799.1,NM_125662.2,NM_118876.3,NM_112720.2,NM_179081.1,NM_111337.3,NM_115346.2,NM_105153.3,NM_180375.1,NM_118145.2,NM_123837.2,NM_180374.1, 19
559 152 ath-MIR447c NC_003075:1523304-1523501:-1	CATTCTTAATATACAATACTTCTTTTTCATGCATTAAGCCCCTTACAATGTCGAGTAAACAAAGCATGTGTCCGCTAATATTGTCTTCGAGCTTGGTATTTTTGTATTCTGATACGGTATTTGGGGACGACATCTTTTGTTGACTCGATATAAGAAGGGGGTTTGTGGAAGAAATTGTAGTATTATATATCAAGAATG	TTGGGGACGACATCTTTTGTTG 1	igr_sense, NM_123652.2,NM_116074.2, 5
560 152 ath-MIR447a NC_003075:1528132-1528368:-1	CATTCTTAATATATAATACTACTTTTTCATCCATTAAACCCCTTACAATGTCGAGTAAACGAAGCATCTGTCCCCTGGTATTGTCTTCGAGCTTGGTGTTTTTTTCTAGCCAACTCCAAGTTCTCGAGTTGATCATTGTTTGTATTCTTGAGACATTATTTGGGGACGAGATGTTTTGTTGACTCGATATAAGAAGGGGCTTTATGGAAGAAATTGTAGTATTATATATCGAGAGTG	TTGGGGACGAGATGTTTTGTTG 1	igr_sense, NM_118583.2,NM_202524.1,NM_179696.2,NM_101963.3,NM_125469.2,NM_202523.1, 7
561 152 ath-MIR447b NC_003075:1535424-1535659:-1	CATTCTTAATATACAATACTACTTTTTCATCCATTAATCCCCTTACAATGTCGAGTAAACGAAGCATCTGTCCCCTGGTATTGTCTTCGAGCTTGGTGTGTTTTTCTAGCCAGCCCCAAGTTCTCGAGTTGATCATTGTTTGTATTCTGACACATTATTTGGGGACGAGATGTTTTGTTGACTCGATATAAGAAGGGGCTTTATGGAAGAAATTGTAGTATTATATATTGAGAATG	TTGGGGACGAGATGTTTTGTTG 1	igr_sense, NM_118583.2,NM_202524.1,NM_179696.2,NM_101963.3,NM_125469.2,NM_202523.1, 7
562 24 NC_003075:1686414-1686492:-1	GAAGACCACTCGACCCCCTGGTCGAGTAGAGGACATCACAAATTCACCTCACCACTCGACCACGAGGTCGAGTGTCTTC	CCACTCGACCACGAGGTCGAGTGT 1.08826 1	repeat_sense,igr_sense, NM_122820.1,NM_117954.1,NM_126793.1,NM_103358.1,NM_113671.2,NM_180584.1,NM_116794.1,NM_113972.1,NM_201705.1,NM_148798.1,NM_148247.1,NM_122819.1,NM_103339.1,NM_122890.1,NM_103391.1,NM_148526.1,NM_147956.1,NM_114067.1,NM_126888.1,NM_201713.1,NM_148782.1,NM_180576.1,NM_179436.1,NM_100205.3,NM_116802.1,NM_126833.1,NM_147987.1,NM_114100.1,NM_103342.1,NM_147971.1,NM_202235.1,NM_…
563 24 NC_003075:1786766-1786936:-1	GGTGATACTCGACTTCTTGGTAGAGTGGTGTGATCGAGTGATGGTCAGGTGGTGGAGGTGATGATACTCGACCTGGTGGTCGAGTGAAGTGATCGAGTGACTCTCATGGTGGTACTCGGCCAGGTGGTCGAGTGGTGAAGTCTTCTACTCGACCAGGGGGTCGAGTGGTCC	TACTCGACCAGGGGGTCGAGT 0.00869644 1	repeat_sense,igr_sense, NM_126793.1,NM_103358.1,NM_122817.1,NM_180584.1,NM_116794.1,NM_113972.1,NM_201705.1,NM_148798.1,NM_148247.1,NM_103339.1,NM_122890.1,NM_119847.2,NM_103391.1,NM_148526.1,NM_147956.1,NM_126888.1,NM_201713.1,NM_148782.1,NM_180576.1,NM_179436.1,NM_122815.1,NM_116802.1,NM_126833.1,NM_147987.1,NM_103342.1,NM_147971.1,NM_202235.1,NM_126781.1,NM_122822.1,NM_122889.1,NM_113973.1,NM_…
564 24 NC_003075:1811557-1811682:-1	GTGGAGGTGATGATACTCGACCTGGTGGTCGAGTGAAGTGATTGAGTGACTCTCATGGTGGTATTCGGCCAGGTGGTCAAGTGGTGAAGTCTTCTACTCGACCAGGGGGTCGAGTGGTCCTTTGAT	CTACTCGACCAGGGGGTCGAGTG 0.0296536 1	repeat_sense,igr_sense, NM_126793.1,NM_103358.1,NM_122817.1,NM_180584.1,NM_116794.1,NM_113972.1,NM_201705.1,NM_148798.1,NM_148247.1,NM_103339.1,NM_122890.1,NM_119847.2,NM_103391.1,NM_148526.1,NM_147956.1,NM_126888.1,NM_201713.1,NM_148782.1,NM_180576.1,NM_179436.1,NM_122815.1,NM_116802.1,NM_126833.1,NM_147987.1,NM_103342.1,NM_147971.1,NM_202235.1,NM_126781.1,NM_122822.1,NM_122889.1,NM_113973.1,NM_…
565 28 NC_003075:1811757-1811846:-1	TCGAGTGATTAGCTGGAGTCTTCTTTTCTTCCTTGTGCTTGAGTGTCTGGTTGAGTGCGGAATGGAGAAGACTCTGAAGCTGGCAATCGA	GGAGAAGACTCTGAAGCTGG 0.15663 1	repeat_sense,igr_sense, NM_114639.2,NM_125915.2,NM_126793.1,NM_115174.2,NM_102203.2,NM_113972.1,NM_201705.1,NM_148798.1,NM_123378.2,NM_148526.1,NM_147956.1,NM_126888.1,NM_201713.1,NM_126833.1,NM_147987.1,NM_103342.1,NM_202235.1,NM_126781.1,NM_119578.2,NM_122828.1,NM_115173.2,NM_113973.1,NM_179432.1,NM_111963.2,NM_126773.1,NM_147965.1, 106
566 332 NC_003075:2018707-2018815:-1	GTAATTCCCTCGCAAATTTTGCAAAGGAATAAATGTCTCGCTATTCACTCGCAATTTGCGAGTAATAATAAATGTAGCAAATTCATTGCAAACTTTGTGAGGGAGTTGC	ATTGCAAACTTTGTGAGGGA 0.0338654 1	repeat_sense,igr_sense, NM_130094.2,NM_126342.2,NM_126327.3, 4
567 36 ath-MIR405d NC_003075:2789656-2789729:-1	ATGAAATGAGTTATGGGTTGACCCAACTCATTTTGTTAAATGAGTTGGGTCTAACCCATAACTCATTTAATCAT	ATGAGTTGGGTCTAACCCATAACT 1	repeat_sense,igr_sense, NM_113768.2,NM_180674.2,NM_113585.2,NM_106502.1,NM_111609.1,NM_112601.3,NM_124203.1, 98
568 333 NC_003075:2829654-2829875:-1	TCGAGTGGTGGTGATGGTGATACTCGACTTCCAGGTAGAGTAATGAGATCGAGTAGTGGTCTGGCAATGAAGGTGAAGACACTCGACCTTGTGGTCGAATGATGTGATCGAGTGATGGTCAGGTGATGGGATGAAGACACTCGACCTCGGGGTCGAGTGATGTGGTGAAGTAGTGATGTCCTCTACTCGACCTGGGGGTCGAGTGATCTGTTGAGATCTTGA	GGGTCGAGTGATCTGTTGAGATC 0.412485 0	repeat_sense,igr_sense, NM_102508.2,NM_116794.1,NM_125578.2,NM_113972.1,NM_201705.1,NM_148798.1,NM_103391.1,NM_101103.3,NM_147956.1,NM_126888.1,NM_120261.2,NM_123774.2,NM_126833.1,NM_147987.1,NM_114078.1,NM_103342.1,NM_126781.1,NM_113973.1,NM_179432.1,NM_147965.1, 162
569 24 NC_003075:2889714-2889783:-1	GATACTCGACCAGGGTCGAGTAAAAGGCATCACCACTTCTCACCACCACTCGACCCCTTGGTCGAGCATT	CACTCGACCCCTTGGTCGAG 0.351382 0	repeat_sense,igr_sense, NM_122820.1,NM_116794.1,NM_113972.1,NM_122819.1,NM_122890.1,NM_103391.1,NM_114067.1,NM_126888.1,NM_180576.1,NM_147987.1,NM_114100.1,NM_103342.1,NM_147971.1,NM_202235.1,NM_126781.1,NM_122822.1,NM_122889.1,NM_122828.1,NM_103402.1,NM_113973.1,NM_179432.1,NM_147959.1,NM_111844.3,NM_122821.1,NM_180578.1,NM_147965.1, 798
570 24 NC_003075:2890702-2890805:-1	ACGTGATGGAGTTACTCGACCAATTGGTCGAGTGGTGTGATTGAGTGATGGTTAGGTATTGAGGTGATGATACTCGACCAGGGGGTCGAGTGGTGTGATCGTGT	ACTCGACCAGGGGGTCGAGTGGTG 0.166095 0	repeat_sense,igr_sense, NM_126793.1,NM_103358.1,NM_122817.1,NM_180584.1,NM_116794.1,NM_113972.1,NM_201705.1,NM_148798.1,NM_148247.1,NM_103339.1,NM_122890.1,NM_119847.2,NM_103391.1,NM_148526.1,NM_147956.1,NM_126888.1,NM_201713.1,NM_148782.1,NM_180576.1,NM_179436.1,NM_122815.1,NM_116802.1,NM_126833.1,NM_147987.1,NM_103342.1,NM_147971.1,NM_202235.1,NM_126781.1,NM_122822.1,NM_122889.1,NM_113973.1,NM_…
571 24 NC_003075:3127486-3127573:-1	GAGGTGATGATACTCGACCTGGTGGTCGAGTGATGTGATCGAGTGACACTCAGGGTGTTACTCGACCATGGGGTCGAGTGGTGACTTT	GTTACTCGACCATGGGGTCGAGTG 0.457192 1	repeat_sense,igr_sense, NM_202974.1,NM_126793.1,NM_103358.1,NM_180584.1,NM_116794.1,NM_113972.1,NM_201705.1,NM_148798.1,NM_148247.1,NM_103339.1,NM_122890.1,NM_202830.1,NM_103391.1,NM_148526.1,NM_119977.3,NM_117637.3,NM_147956.1,NM_114067.1,NM_126888.1,NM_201713.1,NM_148782.1,NM_180576.1,NM_179436.1,NM_116802.1,NM_126833.1,NM_147987.1,NM_103342.1,NM_147971.1,NM_202235.1,NM_126781.1,NM_122822.1,NM_…
572 24 NC_003075:3174655-3174732:-1	GAGACCACTCGACCACCAGGTCGAGTAGAGGACATCACCACTTCACTTCACCACTCGACCCCGAGGTCGAGTGCCCTC	CCACTCGACCCCGAGGTCGAGTGC 0.625643 0	repeat_sense,igr_sense, NM_122820.1,NM_126793.1,NM_130345.2,NM_103358.1,NM_113671.2,NM_180584.1,NM_116794.1,NM_113972.1,NM_201705.1,NM_148798.1,NM_148247.1,NM_122819.1,NM_103339.1,NM_122890.1,NM_103391.1,NM_126651.1,NM_148526.1,NM_147956.1,NM_114067.1,NM_126888.1,NM_148782.1,NM_180576.1,NM_179436.1,NM_100205.3,NM_116802.1,NM_114441.1,NM_126833.1,NM_147987.1,NM_114100.1,NM_103342.1,NM_147971.1,NM_…
573 24 NC_003075:3183852-3183988:-1	GAGACCACTCGACCACCAGGTCGAGTAGAGGACATCACCACTTCACTTCACCACTCGACCCCGAGGTCGAGTGCCCTCATCTCCATCACCAGACCATCACTCGATCACTTTACTCGACCATGAGGTCGAGTGTCTTC	TTACTCGACCATGAGGTCGAGTGT 0.862273 1	repeat_sense,igr_sense, NM_126793.1,NM_103358.1,NM_180584.1,NM_116794.1,NM_103414.1,NM_201705.1,NM_148798.1,NM_148247.1,NM_122819.1,NM_103339.1,NM_122890.1,NM_103391.1,NM_148526.1,NM_147956.1,NM_114067.1,NM_126888.1,NM_201713.1,NM_148782.1,NM_180576.1,NM_179436.1,NM_116802.1,NM_126833.1,NM_147987.1,NM_103342.1,NM_147971.1,NM_202235.1,NM_126781.1,NM_122822.1,NM_122889.1,NM_122828.1,NM_113973.1,NM_…
574 24 NC_003075:3183911-3183988:-1	GAGACCACTCGACCACCAGGTCGAGTAGAGGACATCACCACTTCACTTCACCACTCGACCCCGAGGTCGAGTGCCCTC	CCACTCGACCCCGAGGTCGAGTG 0.546486 0	repeat_sense,igr_sense, NM_122820.1,NM_126793.1,NM_130345.2,NM_103358.1,NM_113671.2,NM_180584.1,NM_116794.1,NM_113972.1,NM_201705.1,NM_148798.1,NM_148247.1,NM_122819.1,NM_103339.1,NM_122890.1,NM_103391.1,NM_126651.1,NM_148526.1,NM_147956.1,NM_114067.1,NM_126888.1,NM_148782.1,NM_180576.1,NM_179436.1,NM_100205.3,NM_116802.1,NM_114441.1,NM_126833.1,NM_147987.1,NM_114100.1,NM_103342.1,NM_147971.1,NM_…
575 24 NC_003075:3263741-3263824:-1	GATGTCTTCTACTCGACCTGGGGGTCGAGTGGTCTCTTGAGATCTTGAAGCTTCTACTCGACCTCTGGGTCGAGTGGTTTTGTC	ACTCGACCTCTGGGTCGAGT 0.273343 0	repeat_sense,igr_sense, NM_122820.1,NM_126793.1,NM_103358.1,NM_180584.1,NM_116794.1,NM_113972.1,NM_148798.1,NM_148247.1,NM_103339.1,NM_122890.1,NM_103391.1,NM_148526.1,NM_147956.1,NM_114067.1,NM_126888.1,NM_201713.1,NM_148782.1,NM_180576.1,NM_179436.1,NM_116802.1,NM_126833.1,NM_147987.1,NM_103342.1,NM_147971.1,NM_202235.1,NM_126781.1,NM_122822.1,NM_122889.1,NM_103402.1,NM_113973.1,NM_179432.1,NM_…
576 24 NC_003075:3263787-3263871:-1	GAGATGAAGACGCTCGACCTCGTGGTCGAGTGGTGAGGTGAAGTTGTGATGTCTTCTACTCGACCTGGGGGTCGAGTGGTCTCTT	CTACTCGACCTGGGGGTCGAGTGG 0.112198 0	repeat_sense,igr_sense, NM_126793.1,NM_122830.1,NM_103358.1,NM_180584.1,NM_116794.1,NM_113972.1,NM_201705.1,NM_148798.1,NM_148247.1,NM_122819.1,NM_103339.1,NM_103391.1,NM_148526.1,NM_147956.1,NM_126888.1,NM_201713.1,NM_148782.1,NM_179436.1,NM_116802.1,NM_126833.1,NM_147987.1,NM_103342.1,NM_202235.1,NM_126781.1,NM_122822.1,NM_113973.1,NM_179432.1,NM_122821.1,NM_120741.2,NM_126773.1,NM_147965.1, 11…
577 24 NC_003075:3263891-3264034:-1	GGTGAAGACACTCGACCTCGGGGTCGAGTGATGTGATCGAGTGAAGGACAGGAGATACTCGACTTCCTGGTTGAGTGATGAGGTCGAGTAGTGGTCTGTCAATGAAGGTGAAGACACTCGACCTCGGGGTCGAGTGATGTGATC	CACTCGACCTCGGGGTCGAGTGATGTG 0.524689 1	repeat_sense,igr_sense, NM_122820.1,NM_118048.1,NM_122997.1,NM_126793.1,NM_103358.1,NM_113671.2,NM_180584.1,NM_116794.1,NM_113972.1,NM_201705.1,NM_148798.1,NM_148247.1,NM_122819.1,NM_103339.1,NM_122890.1,NM_103391.1,NM_148526.1,NM_147956.1,NM_114067.1,NM_126888.1,NM_148782.1,NM_180576.1,NM_201718.1,NM_179436.1,NM_116802.1,NM_126833.1,NM_147987.1,NM_126433.3,NM_103342.1,NM_147971.1,NM_103206.1,NM_…
578 24 NC_003075:3263891-3264034:-1	GGTGAAGACACTCGACCTCGGGGTCGAGTGATGTGATCGAGTGAAGGACAGGAGATACTCGACTTCCTGGTTGAGTGATGAGGTCGAGTAGTGGTCTGTCAATGAAGGTGAAGACACTCGACCTCGGGGTCGAGTGATGTGATC	AAGACACTCGACCTCGGGGTCGAGTGA 0.578619 1	repeat_sense,igr_sense, NM_122820.1,NM_118048.1,NM_122997.1,NM_126793.1,NM_103358.1,NM_113671.2,NM_180584.1,NM_116794.1,NM_113972.1,NM_201705.1,NM_148798.1,NM_148247.1,NM_122819.1,NM_103339.1,NM_122890.1,NM_103391.1,NM_148526.1,NM_147956.1,NM_114067.1,NM_126888.1,NM_148782.1,NM_180576.1,NM_201718.1,NM_179436.1,NM_116802.1,NM_126833.1,NM_147987.1,NM_103342.1,NM_147971.1,NM_103206.1,NM_202235.1,NM_…
579 24 NC_003075:3263899-3264026:-1	CACTCGACCTCGGGGTCGAGTGATGTGATCGAGTGAAGGACAGGAGATACTCGACTTCCTGGTTGAGTGATGAGGTCGAGTAGTGGTCTGTCAATGAAGGTGAAGACACTCGACCTCGGGGTCGAGTG	AGGTGAAGACACTCGACCTCGGGGT 0.0707921 0	repeat_sense,igr_sense, NM_103358.1,NM_180584.1,NM_113972.1,NM_201705.1,NM_148247.1,NM_103339.1,NM_103391.1,NM_147956.1,NM_126888.1,NM_179436.1,NM_116802.1,NM_116144.2,NM_147987.1,NM_202235.1,NM_126781.1,NM_122828.1,NM_113973.1,NM_179432.1,NM_147965.1, 292
580 38 NC_003075:3570391-3570498:-1	ATCCGGATCTAGTGTCGATCGACACTAGAGGGGTATCGATTGACACCGTCGTATTTAGTCGTCTCTGAGAAGAGCATCCCCTATGGTGTCGATCGACACTAGAGGGGT	CTATGGTGTCGATCGACACTA 0.282318 1	repeat_sense,igr_sense, NM_114016.1,NM_126896.1,NM_116818.1,NM_147252.1,NM_114110.1,NM_148529.1,NM_114074.1,NM_114079.1,NM_148282.1,NM_122848.1,NM_126918.1, 333
581 24 NC_003075:3737457-3737534:-1	GAGACCACTCGACAACCAGGTCGAGTAGAGCACATCACCACTTCACCTCACCACTCGACCCCGAGGTCGAGTGCCATC	CCACTCGACCCCGAGGTCGAGTG 0.267277 0	repeat_sense,igr_sense, NM_122820.1,NM_126793.1,NM_130345.2,NM_103358.1,NM_113671.2,NM_180584.1,NM_116794.1,NM_113972.1,NM_201705.1,NM_148798.1,NM_148247.1,NM_122819.1,NM_103339.1,NM_122890.1,NM_103391.1,NM_126651.1,NM_148526.1,NM_147956.1,NM_114067.1,NM_126888.1,NM_148782.1,NM_180576.1,NM_179436.1,NM_100205.3,NM_116802.1,NM_114441.1,NM_126833.1,NM_147987.1,NM_114100.1,NM_103342.1,NM_147971.1,NM_…
582 24 NC_003075:3749701-3749778:-1	GAGACCACTCGACAACCAGGTCGAGTAGAGCACATCACCACTTCACCTCACCACTCGACCCCGAGGTCGAGTGCCATC	CCACTCGACCCCGAGGTCGAGTG 0.267277 0	repeat_sense,igr_sense, NM_122820.1,NM_126793.1,NM_130345.2,NM_103358.1,NM_113671.2,NM_180584.1,NM_116794.1,NM_113972.1,NM_201705.1,NM_148798.1,NM_148247.1,NM_122819.1,NM_103339.1,NM_122890.1,NM_103391.1,NM_126651.1,NM_148526.1,NM_147956.1,NM_114067.1,NM_126888.1,NM_148782.1,NM_180576.1,NM_179436.1,NM_100205.3,NM_116802.1,NM_114441.1,NM_126833.1,NM_147987.1,NM_114100.1,NM_103342.1,NM_147971.1,NM_…
583 24 NC_003075:4034961-4035126:-1	CGAAGACATACTCGACCACCAGGTCGTGTGCATCCAGCACCATACTCGACCCCCAGGTCAAGTGACTTTGGAGCCATTCTTCCCATCTACTCGACCCCCTGATCGAGTATCCTCAGCTCAGGCCACTCGATGACGCCACTCGACCCCCTGGTCGAGTATCACTTCG	CCACTCGACCCCCTGGTCGAGTA 0.140083 1	repeat_sense,igr_sense, NM_122820.1,NM_103358.1,NM_180584.1,NM_116794.1,NM_113972.1,NM_201705.1,NM_148798.1,NM_122819.1,NM_103339.1,NM_122890.1,NM_103391.1,NM_114067.1,NM_126888.1,NM_148782.1,NM_180576.1,NM_116802.1,NM_126833.1,NM_147987.1,NM_114100.1,NM_103342.1,NM_147971.1,NM_148010.1,NM_202235.1,NM_126781.1,NM_122822.1,NM_122889.1,NM_103402.1,NM_113973.1,NM_179432.1,NM_147959.1,NM_122821.1,NM_…
584 334 NC_003075:4128926-4129030:-1	AAGATATGGTATAACCGGTTTACACTTGCCTTAACCAAAAAAATAAAATCAATTTTGTGGTTTTCTTGGTTAAGACTGGTTCAAACCGGTTTACATGCATGTGTT	ACTGGTTCAAACCGGTTTACA 0.0341798 1	igr_sense, NM_130094.2,NM_180591.1,NM_123538.1,NM_122278.2,NM_124808.2,NM_122145.2,NM_123836.1,NM_113597.2,NM_102418.2,NM_202639.1, 8
585 34 NC_003075:4193087-4193273:-1	GTTGGCGCTGCAGCGCATCAACCCTAATCTCTCTCATGTGGGTTAATTGGTAACAACTTGTCCTATGGGAAGATTGTTAAAGGGTGAGGTCTTGGGTTTGAGAAACGTCAAGCGCAACAATAATTTACATGGTGGGCTAGAAGGGCCCACATGAGAGAGGTTAGGGTTGATGCGCTGCAGCACCGAC	AGGTTAGGGTTGATGCGCTG 0.0628263 1	igr_sense, NM_113554.2,NM_114305.1, 20
586 335 NC_003075:4193093-4193267:-1	GCTGCAGCGCATCAACCCTAATCTCTCTCATGTGGGTTAATTGGTAACAACTTGTCCTATGGGAAGATTGTTAAAGGGTGAGGTCTTGGGTTTGAGAAACGTCAAGCGCAACAATAATTTACATGGTGGGCTAGAAGGGCCCACATGAGAGAGGTTAGGGTTGATGCGCTGCAGC	AGAGAGGTTAGGGTTGATGC 0.243812 1	igr_sense, NM_123119.2,NM_115298.3,NM_180685.1,NM_127157.1,NM_100840.1,NM_114305.1, 19
587 24 NC_003075:4530666-4530855:-1	ATACTCGACTTCGTGGTCGAGTAACGTGGCCGAGTGAACGTCAGAGTGGTGGTCAGGTGGTGTGACAAAGTGTTACTCGACCCAGTGGTCGAGTGGTGTCATCGAGTGGCCTGGAGTATGGTTACTCGACCAGGGGGTCTAGTGATTGGTAAGAATGGCTCCAATGTTACTCGACTAGGGGGTCGAGTGT	TACTCGACTAGGGGGTCGAGT 0.134001 0	repeat_sense,igr_sense, NM_126793.1,NM_103358.1,NM_180584.1,NM_116794.1,NM_201705.1,NM_148798.1,NM_148247.1,NM_103339.1,NM_103391.1,NM_148526.1,NM_147956.1,NM_201713.1,NM_148782.1,NM_179436.1,NM_116802.1,NM_126833.1,NM_147987.1,NM_103342.1,NM_202235.1,NM_126781.1,NM_122822.1,NM_179432.1,NM_122821.1,NM_126773.1,NM_147965.1, 646
588 24 NC_003075:4530756-4530919:-1	GATATACTCGACCAGTGGGTCGAGTAAGGTGGTAGAGTGTATGGCCGAGTGGTGGTGAGTGATGATACTCGACTTCGTGGTCGAGTAACGTGGCCGAGTGAACGTCAGAGTGGTGGTCAGGTGGTGTGACAAAGTGTTACTCGACCCAGTGGTCGAGTGGTGTC	TACTCGACCCAGTGGTCGAGTGGT 0.218923 1	repeat_sense,igr_sense, NM_122820.1,NM_126793.1,NM_179005.1,NM_103358.1,NM_180584.1,NM_116794.1,NM_113972.1,NM_201705.1,NM_148798.1,NM_148247.1,NM_122819.1,NM_103339.1,NM_103391.1,NM_148526.1,NM_147956.1,NM_114067.1,NM_126888.1,NM_201713.1,NM_148782.1,NM_180576.1,NM_123420.1,NM_179436.1,NM_116802.1,NM_126833.1,NM_147987.1,NM_114100.1,NM_103342.1,NM_147971.1,NM_202235.1,NM_126781.1,NM_122822.1,NM_…
589 24 NC_003075:4558959-4559036:-1	GAGGGCACTCGACCTCGTGGTCGAGTGGTGAAGTGAAGTGGTGATGTCCTCTGCTCGACCTGGGGGTCGAGTGGTCTC	CTGCTCGACCTGGGGGTCGAGTG 0.0231832 0	repeat_sense,igr_sense, NM_126793.1,NM_103358.1,NM_180584.1,NM_116794.1,NM_113972.1,NM_201705.1,NM_148798.1,NM_148247.1,NM_103339.1,NM_103391.1,NM_148526.1,NM_147956.1,NM_126888.1,NM_201713.1,NM_148782.1,NM_179436.1,NM_116802.1,NM_126833.1,NM_147987.1,NM_103342.1,NM_202235.1,NM_126781.1,NM_122822.1,NM_113973.1,NM_179432.1,NM_122821.1,NM_126773.1,NM_147965.1, 970
590 24 NC_003075:4559061-4559203:-1	GATGAAGTCACTCGGCCTGGGGGTCGAGTGATGTGATCGAGTGGTGTCAGAAGATACTCGACTTCCAAGTTGAGTGAGGAGGTCGAGTGGTGGTCTGATGATGGAGGTGAAGACACTCGACCTCATGGTCGAGTGATGTGATC	CACTCGACCTCATGGTCGAGTGA 0.753792 1	repeat_sense,igr_sense, NM_122820.1,NM_103358.1,NM_180584.1,NM_116794.1,NM_113972.1,NM_201705.1,NM_148798.1,NM_148247.1,NM_122819.1,NM_103339.1,NM_122890.1,NM_103391.1,NM_148526.1,NM_147956.1,NM_114067.1,NM_126888.1,NM_112543.1,NM_201713.1,NM_118849.2,NM_148782.1,NM_180576.1,NM_179436.1,NM_116802.1,NM_126833.1,NM_147987.1,NM_114100.1,NM_103342.1,NM_147971.1,NM_118850.3,NM_202235.1,NM_126781.1,NM_…
591 2 NC_003075:4635375-4635480:-1	GAGGAAACAGTCTCTCGCAAGATTTGCGAGGGATTTGCAACGTGCGTCCGTGTTCTAGAAAAATGCCTGCAATTCCCTCGCAAATTTGCGAGGGATTACTTCCCTC	TCGCAAATTTGCGAGGGATT 0.447531 1	repeat_sense,igr_sense, NM_113908.1,NM_123837.2, 164
592 2 NC_003075:4635384-4635472:-1	AGTCTCTCGCAAGATTTGCGAGGGATTTGCAACGTGCGTCCGTGTTCTAGAAAAATGCCTGCAATTCCCTCGCAAATTTGCGAGGGATT	TTCCCTCGCAAATTTGCGAG 0.934391 1	repeat_sense,igr_sense, NM_147313.1,NM_113908.1,NM_122762.1, 142
593 24 NC_003075:4705986-4706161:-1	GTTGAATACACTCGACCAGGGGGTCGAGTGAAGTGATCGAGTATCTCTCGTGGTGGTACTCGGCCAGGGGGTTGAGTGATGAGATGAAATTGTGAAGTCCCCTACTCGACCAGGGGGTCGAGTGGTCTGTTGAGGTCTTGAAGCTTCTACTCGACGTCGGGGTCGAGTGGTTTGAC	TCTACTCGACGTCGGGGTCGAGTG 0.15137 1	repeat_sense,igr_sense, NM_126793.1,NM_103358.1,NM_180584.1,NM_116794.1,NM_113972.1,NM_148798.1,NM_148247.1,NM_103484.1,NM_111050.1,NM_103339.1,NM_103391.1,NM_148526.1,NM_147956.1,NM_126888.1,NM_148782.1,NM_179436.1,NM_116802.1,NM_126833.1,NM_147987.1,NM_103342.1,NM_202235.1,NM_126781.1,NM_113973.1,NM_179432.1,NM_126773.1,NM_147965.1, 460
594 24 NC_003075:4709539-4709714:-1	GTTGAATACACTCGACCAAGGGGTCGAGTGAAGTGATCGAGTATCTCTCGTGGTGGTACTCGGCCAGGGGGTTGAGTGATGAGATGAAATGGTGAAGTCCCCTACTCGACCAGGGGGTCGAGTGGTCTGTTGAGGTCTTGAAGCTTCTACTCGACCTCGGGGTCGAGTGGTTTGAC	TCTACTCGACCTCGGGGTCGAGTGGT 0.355285 1	repeat_sense,igr_sense, NM_122820.1,NM_126793.1,NM_103358.1,NM_180584.1,NM_116794.1,NM_113972.1,NM_201705.1,NM_148798.1,NM_148247.1,NM_122819.1,NM_103339.1,NM_122890.1,NM_103391.1,NM_148526.1,NM_147956.1,NM_114067.1,NM_126888.1,NM_148782.1,NM_180576.1,NM_201718.1,NM_179436.1,NM_116802.1,NM_126833.1,NM_147987.1,NM_103342.1,NM_147971.1,NM_202235.1,NM_126781.1,NM_122822.1,NM_122889.1,NM_113973.1,NM_…
595 24 NC_003075:4757527-4757776:-1	GAACAGTACTCGACCCAGGTGGTCGAGTGAGAGGTCGAGTGATTAGCTGGCAATCGAGTATGTAATCGAGTGATGGTGATGGTGATACTCGACTTCATGGTAGAGTGGTGTGATCGAGTGAAGTGATCGAGTGACTCTCATGGTGGTACTCGGCCAGGTAGTCGAGTGGTGAAGTCTTCTACTCGACCAGGGGGTCAAGTGGTCCTTTGATGTCGTGGAGCATCTGCTCGACCTGGGGGTCGAGTGGTTT	TGCTCGACCTGGGGGTCGAGTG 0.619749 0	repeat_sense,igr_sense, NM_126793.1,NM_103358.1,NM_180584.1,NM_116794.1,NM_113972.1,NM_201705.1,NM_148798.1,NM_148247.1,NM_103339.1,NM_103391.1,NM_148526.1,NM_147956.1,NM_126888.1,NM_201713.1,NM_148782.1,NM_179436.1,NM_116802.1,NM_126833.1,NM_147987.1,NM_103342.1,NM_202235.1,NM_126781.1,NM_122822.1,NM_113973.1,NM_179432.1,NM_122821.1,NM_126773.1,NM_147965.1, 970
596 28 NC_003075:4780857-4780950:-1	GGTCGAGTGATTAGTTGGAGTCTTCTTTTCTTCCTTGTGCTCGAGTGTCTGGTTGAGTGCGAAATGGAGAAGACTCTGAAGCTGGCAATCGAGT	AGAAGACTCTGAAGCTGGCA 0.0298539 1	repeat_sense,igr_sense, NM_126430.1,NM_123958.2,NM_126793.1,NM_201705.1,NM_148526.1,NM_147956.1,NM_201713.1,NM_126833.1,NM_179950.1,NM_128183.2,NM_126773.1,NM_121699.3, 99
597 24 NC_003075:4893801-4893884:-1	ATGTCAAACCACTCGACCACGAGGTCGAGTAGGAGCTTCAAGATCTCAAAAGATCACTCGACCCCCTGGTCGAGTAGAGGACAT	ACTCGACCCCCTGGTCGAGTA 0.433924 0	repeat_sense,igr_sense, NM_122820.1,NM_103358.1,NM_180584.1,NM_116794.1,NM_113972.1,NM_201705.1,NM_148798.1,NM_122819.1,NM_103339.1,NM_122890.1,NM_103391.1,NM_114067.1,NM_126888.1,NM_148782.1,NM_180576.1,NM_116802.1,NM_126833.1,NM_147987.1,NM_114100.1,NM_103342.1,NM_147971.1,NM_202235.1,NM_126781.1,NM_122822.1,NM_122889.1,NM_103402.1,NM_113973.1,NM_179432.1,NM_147959.1,NM_122821.1,NM_180578.1,NM_…
598 24 NC_003075:4958393-4958614:-1	GGTGAAGGCACTCGACCTGGGGGTCGAGTGATGTGATCGAGTGGTGTCAGAAGATACTCGACTTCCAGGTTGAGTGAAGAGGTCGAGTGGTGGTGATGAGGGCACTCGACCACGTGGTCGAGTGGTGAAGTGAAGTGGTGATGTCCTCTGCTCGACCTGGGGGTCGAATAGTCTCTTGAGATCTTGAAGCTCCTACTCGACCTCTTGGTCGAGTGGTTTGTC	TACTCGACCTCTTGGTCGAGTGG 0.160321 1	repeat_sense,igr_sense, NM_122820.1,NM_126793.1,NM_103358.1,NM_180584.1,NM_116794.1,NM_113972.1,NM_201705.1,NM_148798.1,NM_148247.1,NM_122819.1,NM_103339.1,NM_122890.1,NM_103391.1,NM_148526.1,NM_147956.1,NM_114067.1,NM_126888.1,NM_201713.1,NM_148782.1,NM_180576.1,NM_179436.1,NM_116802.1,NM_126833.1,NM_147987.1,NM_114100.1,NM_103342.1,NM_105009.2,NM_147971.1,NM_202235.1,NM_126781.1,NM_122889.1,NM_…
599 24 NC_003075:4958487-4958699:-1	TCATCAAGTATGTAGTCGAGTGGTGTGATGGCGATACTCGACCTCTAGGTAGAGTGATGAGGTCGAGTAGTGGTCTGGCAGTGAAGGTGAAGGCACTCGACCTGGGGGTCGAGTGATGTGATCGAGTGGTGTCAGAAGATACTCGACTTCCAGGTTGAGTGAAGAGGTCGAGTGGTGGTGATGAGGGCACTCGACCACGTGGTCGAGTGGTGA	GGCACTCGACCACGTGGTCGAGTG 0.0941384 0	repeat_sense,igr_sense, NM_122820.1,NM_126793.1,NM_118532.2,NM_103358.1,NM_122817.1,NM_180584.1,NM_116794.1,NM_113972.1,NM_201705.1,NM_148798.1,NM_148247.1,NM_122819.1,NM_103339.1,NM_122890.1,NM_103391.1,NM_148526.1,NM_147956.1,NM_114067.1,NM_126888.1,NM_201713.1,NM_148782.1,NM_180576.1,NM_123420.1,NM_179436.1,NM_122815.1,NM_116802.1,NM_126833.1,NM_147987.1,NM_114100.1,NM_103342.1,NM_147971.1,NM_…
600 24 NC_003075:4967993-4968214:-1	GGTGAAGGCACTCGACCTGGGGGTCGAGTGATGTGATCGAGTGGTGTCAGAAGATACTCGACTTCCAGGTTGAGTGAAGAGGTCGAGTGGTGGTGATGAGGGCACTCGACCACGTGGTCGAGTGGTGAAGTGAAGTGGTGATGTCCTCTGCTCGACCTGGGGGTCGAGTGGTCTCTTGAGATCTTGAAGCTCCTACTCGACCTCTTGGTCGAGTGGTTTGTC	TACTCGACCTCTTGGTCGAGTG 0.098086 1	repeat_sense,igr_sense, NM_122820.1,NM_126793.1,NM_103358.1,NM_180584.1,NM_116794.1,NM_113972.1,NM_201705.1,NM_148798.1,NM_148247.1,NM_122819.1,NM_103339.1,NM_122890.1,NM_103391.1,NM_148526.1,NM_147956.1,NM_114067.1,NM_126888.1,NM_201713.1,NM_148782.1,NM_180576.1,NM_179436.1,NM_116802.1,NM_126833.1,NM_147987.1,NM_114100.1,NM_103342.1,NM_105009.2,NM_147971.1,NM_202235.1,NM_126781.1,NM_122889.1,NM_…
601 24 NC_003075:4968042-4968162:-1	GATACTCGACTTCCAGGTTGAGTGAAGAGGTCGAGTGGTGGTGATGAGGGCACTCGACCACGTGGTCGAGTGGTGAAGTGAAGTGGTGATGTCCTCTGCTCGACCTGGGGGTCGAGTGGTC	CTCGACCTGGGGGTCGAGTGG 0.172533 0	repeat_sense,igr_sense, NM_126793.1,NM_103358.1,NM_180584.1,NM_116794.1,NM_113972.1,NM_201705.1,NM_148798.1,NM_148247.1,NM_103339.1,NM_103391.1,NM_148526.1,NM_147956.1,NM_126888.1,NM_201713.1,NM_148782.1,NM_179436.1,NM_116802.1,NM_126833.1,NM_147987.1,NM_103342.1,NM_202235.1,NM_126781.1,NM_122822.1,NM_113973.1,NM_179432.1,NM_122821.1,NM_120741.2,NM_126773.1,NM_147965.1, 967
602 60 NC_003075:4968139-4968206:-1	CACTCGACCTGGGGGTCGAGTGATGTGATCGAGTGGTGTCAGAAGATACTCGACTTCCAGGTTGAGTG	GATACTCGACTTCCAGGTTGAG 0.17348 0	repeat_sense,igr_sense, NM_122820.1,NM_116794.1,NM_113972.1,NM_148798.1,NM_123224.2,NM_130292.2,NM_147956.1,NM_126888.1,NM_180576.1,NM_147987.1,NM_103342.1,NM_147971.1,NM_126781.1,NM_122828.1,NM_113973.1,NM_147959.1,NM_180578.1,NM_147965.1, 127
603 336 NC_003075:5094411-5094487:-1	TTGGTACTGGTGTCAATCGACACCCAAGTGGTATCTGTCGACACTATAGATGGGTGTCGAGTGATTCTAAAGTTCAA	GATGGGTGTCGAGTGATTCT 0.0357689 0	intron_antisense,repeat_sense, NM_148233.1,NM_112305.1, 2
604 337 NC_003075:7006378-7006464:-1	AAAGAACAAATTCTCCAGGTTCATGCGGCTCAGCTTGGTGATCTCAACCTCCGTTTGAGCCGCATGAACCCGAAGAATTTGTTCTTT	CCGCATGAACCCGAAGAATTT 0.50165 1	igr_sense, NM_127996.1,NM_113106.1,NM_114131.2,NM_112500.1,NM_105202.2, 4
605 90 NC_003075:9981366-9981508:-1	CTTTTAACTGTTTGATTCGTACACTTAGATCTGTACAACATTTTTTAGTGTACAGATGTAAGTGTACGTTGTGTATATTTATATATATATATATACACTAAAAATATTGTACAGGTCTAAGTGTACGAATCAACAGTGAAAAG	GGTCTAAGTGTACGAATCAA 0.563751 1	igr_sense, NM_179830.1,NM_100780.3,NM_099986.2,NM_202070.1, 18
606 338 NC_003075:11155776-11155985:-1	CTCTCCGAGAGTCGCTCCGGCGGAGATCCATGCCGAATTCGAGGCGATATCTACAGAGACGTCACGGATATTCGACATGTCGAGGATGAAAAATGGTTTGTCGGAAATGTAAGAGAGACCATCGTAGTCATGGCCGCCGCTTCGGATTTTGAGGAGGAAATTTAGGGTTTTTGAGCAAGTGACGGCGGCGCTGACGTGGCTCTCGGAGCG	GCGCTGACGTGGCTCTCGGA 0.102903 0	cds_antisense,exon_antisense, NM_129580.1,NM_202851.1,NM_118201.2,NM_118202.1, 3
607 339 NC_003075:12352953-12353155:-1	GGAATACAAAAGAGAGAGGGAGCTCCCTTCAGTCCAATCAAAGAGAATCAATGATCCAATTTGTCTACCGCATCATTCATTCATTTAACGAGTCTAGTTTGAATTTTGGCGACTCGGTATTTGGATGAATGAGTCGGAAGCTAATTGAATCATATCACGACCTGTGAATGGACTCAAGGAAGCTCTCTCTACATATATATTCC	GGAAGCTCTCTCTACATATATA 0.453643 0	igr_sense, NM_179471.1,NM_101315.2,NM_122176.2,NM_100179.2,NM_128850.2,NM_103856.1,NM_113947.1,NM_101141.3,NM_123454.2,NM_121562.2,NM_112888.2,NM_120035.2,NM_106464.2,NM_202018.1,NM_126269.2,NM_110973.2,NM_119031.1,NM_123777.2,NM_104525.2,NM_111477.2,NM_100180.2, 18
608 340 NC_003075:12822691-12822827:-1	AATTCGGTGGTAATTTTTCTAGTGGCATGAGTCAATAGTTTTTTGTTGGTTTAATGAAACATTCAATGAACATGTTACGTGTATCGGTGTATCATTAGTTACATTGAACTTTGCCGCTTGTAATTTACCATCGAATT	TTGCCGCTTGTAATTTACCATC 0.0619177 0	intron_sense, NM_117490.2,NM_120903.2, 3
609 341 NC_003075:13638952-13639052:-1	TTACTTTCTTTGTTATCCATCTTCGGAGAAATTAGCTTGACATTAATACTTTTTTGACAAATTGTAACGTTTTCTCCGGAGATGGATAACAACGAAAGTAA	CCGGAGATGGATAACAACGA 0.677025 1	igr_sense, NM_103087.1,NM_106320.2, 4
610 342 NC_003075:15467399-15467510:-1	TGCCTAAAAAAGCCAGCTTCTGCAGATGAAGTGCAATCGAGAGAGATTTCTTCTGCCGGGTGGAATCGTACTTACGACATTGCACTTCACTGCAGAAGCTGGCGTTGAGGTA	TTCACTGCAGAAGCTGGCGT 0.109941 0	cds_antisense,exon_antisense, NM_120304.2,NM_128513.2,NM_119349.1,NM_101830.2,NM_124732.1, 4
611 343 NC_003075:15467400-15467509:-1	GCCTAAAAAAGCCAGCTTCTGCAGATGAAGTGCAATCGAGAGAGATTTCTTCTGCCGGGTGGAATCGTACTTACGACATTGCACTTCACTGCAGAAGCTGGCGTTGAGGT	TGCACTTCACTGCAGAAGCTG 0.422063 0	cds_antisense,exon_antisense, NM_178992.2,NM_119493.1,NM_117176.2,NM_202906.1,NM_119349.1,NM_124732.1,NM_119060.3,NM_113124.1,NM_202623.1, 3
612 344 NC_003075:17324779-17324877:-1	GACGAAGATCTTGAGCGGTGACGAGATCTTAGCAGCCGTAGTAGTAATCGCTGGTGTTGTTGTTCCTCCAGTATTCGTCGCCGTTGTTCGATCGCCGTC	TTCGTCGCCGTTGTTCGATC 0.246386 0	cds_antisense,exon_antisense, NM_119839.2,NM_116510.2,NM_126149.2,NM_119725.4,NM_121943.1, 2
613 345 NC_003075:18017250-18017356:-1	CGTCGTTCAAGCCAACAGCTTGCTAGAGGACCAGAGCCAGCTCGAGTCTGGCTCTCTTAGCTCCCACGACTCTGGTCCCTTTGGCACCTTTGTTGGCGTCTACGACG	CCTTTGGCACCTTTGTTGGC 0.443713 0	exon_sense,cds_sense, NM_111040.2,NM_103718.2,NM_121678.2, 5
614 90 NC_003076:113288-113430:-1	CTTTTAACTGTTTGATTCGTACACTTAGATCTGTACAACACTTTTTAGTGTACAGATGTAAGTGTATGTTGTGTATATTTATATATATATATATACACTAAAAATATTGTACAGGTCTAAGTGTACGAATCAACAGTGAAAAG	GGTCTAAGTGTACGAATCAA 0.515105 1	igr_sense, NM_179830.1,NM_100780.3,NM_099986.2,NM_202070.1, 18
615 30 NC_003076:1188206-1188306:-1	TTGTAGGCGCAGCACCATTAAGATTCACATGGAAATTGATAAATACCCTAAATTAGGGTTTTGATATGTATATGAGAATCTTGATGATGCTGCATCAACAA	GAGAATCTTGATGATGCTGC 0.114889 1	igr_sense, HASH(0xec1bc80) NM_179982.1,NM_201823.1,NM_120453.2,NM_101959.1,NM_130229.1,NM_101311.3,NM_102673.4,NM_121293.2,NM_201824.1,NM_128415.2,NM_119856.2,NM_126118.2,NM_105956.1,NM_116414.3,NM_125976.2,NM_202097.1,NM_125405.3,NM_118527.1, 14
616 346 NC_003076:2394846-2395005:-1	GTGGACCTTCACCAGGTGGAGATGCAATGACTGGACCAACACCGGGAGGACCAACACCGAGTGGACTTACACCAGATGGACATTTACCTAGTGGAGATATATCAAGTGGAAATTTTCCGGGTGGATCTCCATCGGATGCATCTTCACCAGGTGGATCTAT	GATGCATCTTCACCAGGTGGA 0.363275 1	cds_antisense,exon_antisense, NM_117409.3,NM_179209.1,NM_121735.2,NM_100832.1,NM_123767.1,NM_100397.1,NM_128675.2,NM_118778.1,NM_120839.1, 8
617 118 ath-MIR162a NC_003076:2634935-2635023:-1	CGCTGGAGGCAGCGGTTCATCGATCTCTTCCTGTGAACACATTAAAAATGTAAAAGCATGAATAGATCGATAAACCTCTGCATCCAGCG	TCGATAAACCTCTGCATCCAG 1	igr_sense, HASH(0xec3f788) NM_110999.4,NM_115453.2,NM_103739.3,NM_099986.2, 4
618 72 NC_003076:3311972-3312062:-1	CAATACATTCGTAATCAGACCAAATCCAAGAGCTATACGGATTGTTGCCATGTGTATAGCTCTTGGATTTGGTCTGATTACGAATGTATTG	CTTGGATTTGGTCTGATTAC 0.153499 1	igr_sense, NM_202635.1,NM_113524.3,NM_180949.1,NM_113525.3,NM_115577.2,NM_126019.2, 7
619 347 NC_003076:3456641-3456738:-1	GAAGTTGACAGAAGAGAGTGAGCACACAAAGGGGAAGTTGTATAAAAGTTTTGTATATGGTTGCTTTTGCGTGCTCACTCTCTTTTTGTCATAACTTC	GCGTGCTCACTCTCTTTTTG 0.973689 1	igr_sense, NM_123544.2,NM_129048.2,NM_121969.1,NM_127899.2, 5
620 348 NC_003076:3510476-3510585:-1	TGTAGCGGCGGCAGAGGCAGCTGTGTGGAGATTGAGGAAGTTGTTGTCGGAGCGGAGGAGCCAATTAGGGGGTGCTGATTCTTGAAAATGTTGTTGCTGCTGCTGTTGCG	TTGAAAATGTTGTTGCTGCTGCTG 0.0221917 0	cds_antisense,exon_antisense, NM_123819.2,NM_121351.1,NM_125520.1,NM_124814.1,NM_179349.1,NM_105445.1,NM_101598.2,NM_180408.1,NM_122905.1,NM_113670.3,NM_103165.1,NM_126084.2,NM_180914.1,NM_116221.1,NM_202440.1,NM_113045.1,NM_126359.2,NM_179461.1,NM_116159.2,NM_100488.3,NM_121757.3,NM_116132.1,NM_102276.2,NM_119156.2,NM_106721.1,NM_128263.3,NM_102148.3,NM_105026.2,NM_180520.1,NM_121209.3,NM_122080…
621 349 NC_003076:5590314-5590447:-1	TCGCACATCTGTTAGGAGGGGAGCAAATTAATGCTTTATAGGACTTTAGGGCACCCACACTCTTAATTTATAGTGGTGACTACTTTCCAAGGTCTTATAATATTTTAACTTGTTCCCCTCCTAAAGGATGTGGA	TTGTTCCCCTCCTAAAGGAT 0.684435 1	intron_sense, NM_118269.2,NM_103432.1,NM_123006.1, 3
622 350 NC_003076:6568494-6568647:-1	GAAAGTAACGTCCTTATGAGCAATCTCCATTCCTCAGGCGTCGGTATAGATCCAAGTAACCCGGTGACTCTGGTCTGATTAACCTGCATAGACAAAATGGAACAGAATGTATTGCCAAAGGGAATTGGAGATTGCTCATAAGGATGTTACTATC	TTGCTCATAAGGATGTTACT 0.778205 0	intron_antisense, NM_201982.1,NM_130353.2, 5
623 351 NC_003076:7250157-7250296:-1	ACTTGGTTTTCTCCGTCTCCGTCTCCGTCTGACTCTTCCTCTTCTCCTTCATCTTCTGCTTCTTCTTCCATTGGGAGGAATAGCGACGACGGTGAGAAATCGTCGGAGGACGGTGGAGATGACGCCGGAGAGAATGAAGT	TGGAGATGACGCCGGAGAGA 0.33544 1	exon_sense,cds_sense, NM_129204.2,NM_121696.1,NM_118887.2,NM_122565.2,NM_121291.2,NM_112745.1,NM_113073.1,NM_202514.1,NM_106389.3,NM_118536.2,NM_111559.2, 7
624 352 NC_003076:7595043-7595273:-1	TCGAAATCTCTCTCATGGCATTTCATGGAAATTTCAGGTCCTTCAGCGAATATTGATGGGCACAGATGTTGTGAAAAATGTGAATAAAAACAATGCGTCTCATGCCGTGCTGTTTGAAGCTCTCTCCCTGGTAAGCTCTATCTAAGAAATAGCATTAACTTTTTGAGGTTCAATTGTTGATTATACTCAAGTCAACTATCTGTCCATGAAATGCCATGAGAGAGAATTCGA	TCCATGAAATGCCATGAGAG 0.14336 1	intron_sense, NM_113698.2,NM_111235.2, 4
625 118 ath-MIR162b NC_003076:7740601-7740711:-1	GAGTGAAGTCGCTGGAGGCAGCGGTTCATCGATCAATTCCTGTGAATATTTATTTTTGTTTACAAAAGCAAGAATCGATCGATAAACCTCTGCATCCAGCGCTGCTTGCTC	TCGATAAACCTCTGCATCCAG 1	igr_sense, HASH(0xec692c0) NM_110999.4,NM_115453.2,NM_103739.3,NM_099986.2, 4
626 138 NC_003076:8181536-8181639:-1	GGTGCGCTTGGCGTTCCTCGAACCCAAGACCTCATCCTTTAACAACTTTCCCAAAGGACAAGCTGTTACCAATTGACTTGGGTTCGAGGAACGCCAAGCGCACC	TGGGTTCGAGGAACGCCAAG 0.270654 1	igr_sense, NM_102771.2,NM_118625.2, 16
627 353 NC_003076:8527503-8527625:-1	AGAGCAAAATGTAGCCGAAGGACAACTTGCCAGAAATATGTTCATCACATAATTAATCATCACATTATTCATATGCATGGTTAACAACGTTCCGGCAAGTCATCCTTGGCTGCATTATACTCT	CGGCAAGTCATCCTTGGCTGC 0.19028 1	igr_sense, NM_101044.2,NM_104293.2,NM_124870.3, 17
628 354 NC_003076:8922699-8922800:-1	TTTACGAGTTGGAGATTTGGAGTGATGCTGATATTTTTTTTATCCATCCATCTCCGATCAAGAAACTATTAGCATCACTCCAAGTCTCTAATTACTCGTAAG	ATCACTCCAAGTCTCTAATT 0.410916 1	igr_sense, NM_126615.3,NM_120523.2,NM_111885.2, 7
629 355 NC_003076:9980767-9980867:-1	GCGATTGTCTAGAAGTGATGAGCAACGTCCTGAGTGTACGACAAGCTTAGATCTTGATCCTATAGGCAACAGCGTTGCTTCGTCATCTTCTGACCAAGAGC	AGCGTTGCTTCGTCATCTTCT 0.386207 0	repeat_sense,igr_sense, NM_103492.3,NM_118371.1,NM_130075.3,NM_104531.1,NM_180283.2,NM_120337.1,NM_111441.2,NM_105838.3,NM_105795.3,NM_106609.2,NM_111099.2,NM_127560.3,NM_114601.1,NM_124456.1,NM_119268.3,NM_180187.1,NM_112847.2,NM_120363.2,NM_125240.2,NM_179227.1,NM_180885.1,NM_128285.2, 5
630 58 NC_003076:10107147-10107223:-1	CGTCCGACGATCGGTCAGTCCGATCCGTCTGGCCGATCCGATCCGTCTGACGATCGGTCTGGCCGATCCGTCTGACG	GACGATCGGTCTGGCCGATCCG 0.0609586 1	repeat_sense,igr_sense, NM_180581.1,NM_148774.1,NM_116231.1,NM_104365.1,NM_116769.1,NM_117112.1,NM_122694.1,NM_179689.1,NM_126667.1,NM_114591.1,NM_122695.1,NM_113881.1, 124
631 356 NC_003076:10164301-10164443:-1	ATCAAACGGCAAGCAGTTGCAGTTGCAGAGATATATTCTCATTTATTAGACATGTATAAAGCTGTTTGGTCTCCATAGAAAGTTGTACACGTAGATCTGTTTAAGTTCTTTATCTTTGCAACTGCAACTGCTTGTATACTGGT	CAACTGCAACTGCTTGTATA 0.0169313 0	igr_sense, NM_147905.2,NM_116459.2,NM_202772.1,NM_179998.1,NM_201831.1,NM_115390.1,NM_179803.2,NM_115347.3,NM_101816.2,NM_202208.1,NM_122406.2,NM_121866.1,NM_129600.2,NM_178956.2,NM_115472.3,NM_122525.2, 5
632 38 NC_003076:10729141-10729223:-1	CCTTCCAGTGTCGATCGACACCCTATGGAACACTCTTCTCTAAGACGATTCCATACGACGGTGTCGATCGACACTGGGTCCGG	GACGGTGTCGATCGACACTG 0.418578 0	repeat_sense,igr_sense, NM_114016.1,NM_116818.1,NM_147252.1,NM_114110.1,NM_148529.1,NM_114074.1,NM_114079.1,NM_126918.1, 53
633 54 NC_003076:10816771-10816854:-1	TCCCTCGCAAATTTGCGATGTTTTTGCGAAGAATCGTGCTTTCCACGCAGTTTCCTCGCAAACGTCTCGCAAATTTGCGAGGGA	CCTCGCAAACGTCTCGCAAATTTG 0.0420908 1	repeat_sense,igr_sense, NM_121049.3,NM_104162.1,NM_147313.1,NM_119793.3,NM_103854.2,NM_100604.1, 46
634 2 NC_003076:10820198-10820309:-1	TCCTCGCAAACTTTGCGAGGGATTTGCAATCAATAATTCTGTAGCAAACCTGCGAAGGAGTTGCGAGTTCCTGCGTTTGTAGTAGCAAATCCCTCGCAACTTTTGCGATGGA	ATCCCTCGCAACTTTTGCGA 0.275312 0	repeat_sense,cds_antisense,exon_antisense, NM_112129.1,NM_104162.1,NM_147313.1,NM_122762.1, 78
635 2 NC_003076:10820279-10820422:-1	GGTCGTAATTCTCTCGCAAAATTTGCGAGGAAATAGATGTCTCGCTAACCTCTTGCAATTTGCAAGGGAAATAAAACGTCGCAAATTCACCGCAAATGAGCTGTCTCCCTAATTCCTCGCAAACTTTGCGAGGGATTTGCAATC	CCTCGCAAACTTTGCGAGGGA 0.805798 1	repeat_sense,cds_antisense,exon_antisense, NM_104162.1,NM_147313.1,NM_113908.1,NM_122762.1,NM_123178.2, 127
636 24 NC_003076:11078431-11078510:-1	GTCCTCTACTCGACCAGGGGGTCGAGTGGTCTCTTGAGGTCTTGAAGCTTCTACTCGACCTCGGGGTCGAGTGGTTTGAC	TCTACTCGACCTCGGGGTCGAGTGGT 0.571522 0	repeat_sense,igr_sense, NM_122820.1,NM_126793.1,NM_103358.1,NM_180584.1,NM_116794.1,NM_113972.1,NM_201705.1,NM_148798.1,NM_148247.1,NM_122819.1,NM_103339.1,NM_122890.1,NM_103391.1,NM_148526.1,NM_147956.1,NM_114067.1,NM_126888.1,NM_148782.1,NM_180576.1,NM_201718.1,NM_179436.1,NM_116802.1,NM_126833.1,NM_147987.1,NM_103342.1,NM_147971.1,NM_202235.1,NM_126781.1,NM_122822.1,NM_122889.1,NM_113973.1,NM_…
637 357 NC_003076:11081743-11081838:-1	GGTCGAGTGGCAGCTCGAGTGACTGGTCGAGTGGCTGCTCGAGTGACTGGTCGAGTGGCTGGTCGAGTGGTTGCTCGAGTGGCTGCTCAAGTGACT	GGTTGCTCGAGTGGCTGCTCA 0.0743372 0	repeat_sense,igr_sense, NM_179269.1,NM_120093.2,NM_122432.1,NM_100503.2,NM_119960.1, 34
638 24 NC_003076:11213396-11213571:-1	GGTGAAGACACTCGACCTCATGGTCGAGTGAAGCGATCGAGTGATGGAGACGAGGGCACTCGACCTCGGGGTCGAGTGGTGAAGTGAAGTAGTGATGTCCTCTACTCGACCTGGTGGTCGAGTGGTCTCTTGAGATCTTGAAGCTCCTACTCGACCTTTGGGTCGAGTGGTTTGTC	CTACTCGACCTTTGGGTCGAGTGGT 0.198869 1	repeat_sense,igr_sense, NM_126793.1,NM_103358.1,NM_180584.1,NM_116794.1,NM_113972.1,NM_201705.1,NM_148798.1,NM_148247.1,NM_103339.1,NM_103391.1,NM_105517.1,NM_148526.1,NM_147956.1,NM_126888.1,NM_201713.1,NM_148782.1,NM_201718.1,NM_179436.1,NM_116802.1,NM_126833.1,NM_147987.1,NM_103342.1,NM_202235.1,NM_126781.1,NM_122822.1,NM_113973.1,NM_179432.1,NM_122821.1,NM_126773.1,NM_147965.1, 540
639 24 NC_003076:11213443-11213520:-1	GAGGGCACTCGACCTCGGGGTCGAGTGGTGAAGTGAAGTAGTGATGTCCTCTACTCGACCTGGTGGTCGAGTGGTCTC	CTACTCGACCTGGTGGTCGAGTGGT 0.410572 0	repeat_sense,igr_sense, NM_122820.1,NM_126793.1,NM_179005.1,NM_122830.1,NM_103358.1,NM_122817.1,NM_180584.1,NM_116794.1,NM_113967.1,NM_113972.1,NM_201705.1,NM_148798.1,NM_148247.1,NM_122819.1,NM_103339.1,NM_103391.1,NM_148526.1,NM_147956.1,NM_114067.1,NM_126888.1,NM_201713.1,NM_148782.1,NM_179436.1,NM_122815.1,NM_116802.1,NM_126833.1,NM_147987.1,NM_103342.1,NM_202235.1,NM_126781.1,NM_122822.1,NM_…
640 84 NC_003076:11366006-11366150:-1	CTCCCAACTCGTCACCAGCCAGTTCCACGGGGAATACGAAGCTAAAGACGAGCGCATAGAAGCGTACCTCGAACTGGTCAAAACCTTGACCCAACAGTTCGAATCGTTTGAATTAACCTGGAACTGGCTGGTGACGAGTTGGGAG	GGAACTGGCTGGTGACGAGT 0.680016 1	repeat_sense,igr_sense, NM_105252.1,NM_120945.2, 23
641 24 NC_003076:11423111-11423190:-1	GTCCCCTACTCGACAAGGGGGTCGAGTGGTCTGTTGAGGTCGTGAAGTGTCTGCTCGACCTGGGGGTCGAGTGGTTTGAC	TCTGCTCGACCTGGGGGTCGAGTGGT 0.504197 0	repeat_sense,igr_sense, NM_126793.1,NM_103358.1,NM_180584.1,NM_116794.1,NM_113972.1,NM_201705.1,NM_148798.1,NM_148247.1,NM_103339.1,NM_103391.1,NM_148526.1,NM_147956.1,NM_126888.1,NM_201713.1,NM_148782.1,NM_179436.1,NM_116802.1,NM_126833.1,NM_147987.1,NM_103342.1,NM_202235.1,NM_126781.1,NM_122822.1,NM_113973.1,NM_179432.1,NM_122821.1,NM_120741.2,NM_126773.1,NM_147965.1, 984
642 24 NC_003076:11438559-11438754:-1	GGTGATACTCGACTTCCAGGTAGAGTGATGAGGTCGAGTAGTGGTCTGACAATGGGATGAAGACACTCGACCTCGGGGTCGAGTGATGTGATCGAGTGGTGGTCAGGAGATGGAGATGAAGACACTCGACCTGGTGGTCGAGTGGTGAGGTGAAGTGGTGATGTCTTCTACTCGACCTGGGGGTCGAGTGGTCTCT	CTCGACCTGGGGGTCGAGTGGT 0.0162499 1	repeat_sense,igr_sense, NM_126793.1,NM_103358.1,NM_180584.1,NM_116794.1,NM_113972.1,NM_201705.1,NM_148798.1,NM_148247.1,NM_103339.1,NM_103391.1,NM_148526.1,NM_147956.1,NM_126888.1,NM_201713.1,NM_148782.1,NM_179436.1,NM_116802.1,NM_126833.1,NM_147987.1,NM_103342.1,NM_202235.1,NM_126781.1,NM_122822.1,NM_113973.1,NM_179432.1,NM_122821.1,NM_120741.2,NM_126773.1,NM_147965.1, 971
643 24 NC_003076:11440386-11440465:-1	GTCCCCTACTCGACCAGGGGGTCGAGTGGTCTGTTGAGGTCTTGAAGCTTCTACTCGACCTTGTGGTCGAGTGGTTTGAC	TCTACTCGACCTTGTGGTCGAGTGGT 0.695924 1	repeat_sense,igr_sense, NM_122820.1,NM_126383.1,NM_201757.1,NM_126793.1,NM_179004.1,NM_179005.1,NM_103358.1,NM_180584.1,NM_116794.1,NM_113972.1,NM_201705.1,NM_148798.1,NM_148247.1,NM_127566.2,NM_122819.1,NM_103339.1,NM_103391.1,NM_148526.1,NM_147956.1,NM_114067.1,NM_126888.1,NM_201713.1,NM_148782.1,NM_148517.1,NM_179436.1,NM_116802.1,NM_126833.1,NM_147987.1,NM_103342.1,NM_201715.1,NM_202235.1,NM_…
644 24 NC_003076:11445619-11445847:-1	TCACATCACTCGACCTCGAGGTCGAGTGTCTTCACCTCCACCACCTGACCATCACTCGATCACGTCACTCTACCTTGAAGTCGAGTATCTTCATCACCACTGTTAAATGCCGAGGCCGACTCAAATCGTAAAACGAGATGAAATTATGAAGTCCCCTACTCGACCAGGGGGTCGAGTGGTCTGTTGAGGTCTTGAAGCTTCTACTCGACCTCGTGGTCGAGTGGTTTGA	ACTCGACCTCGTGGTCGAGTGGT 0.119199 1	repeat_sense,igr_sense, NM_122820.1,NM_126793.1,NM_103358.1,NM_180584.1,NM_116794.1,NM_113972.1,NM_201705.1,NM_148798.1,NM_148247.1,NM_122819.1,NM_103339.1,NM_122890.1,NM_103391.1,NM_148526.1,NM_147956.1,NM_114067.1,NM_126888.1,NM_201713.1,NM_148782.1,NM_180576.1,NM_179436.1,NM_116802.1,NM_126833.1,NM_147987.1,NM_114100.1,NM_103342.1,NM_147971.1,NM_202235.1,NM_126781.1,NM_122822.1,NM_122889.1,NM_…
645 38 NC_003076:11497405-11497469:-1	GCATTCTGCTCCCGAAGGTGTCGATCGACACCTAGTTGGTGTCGCTCGACACCGAGCCCTAATGC	GTTGGTGTCGCTCGACACCGAG 0.347483 0	repeat_sense,igr_sense, NM_114016.1,NM_121001.2,NM_126896.1,NM_126950.1,NM_111421.2,NM_116818.1,NM_114110.1,NM_148529.1,NM_114079.1,NM_114102.1,NM_122848.1,NM_126918.1, 356
646 104 NC_003076:11774084-11774304:-1	AGCTTCTTCTTCCATCTCAAAGCTTTGATGGTGTAGCCGAAGTCCATATGAGTCTTTGTCTTTGTATCTTTTAATAAGGATACAATACTTAGGCTTTTAAGATCTGTTTGCAGTTCTAGTTGTTATACTCACTCATACACATGGCATCTAGTCATATTTGACTCCAAAACACTAACCAAGGTTCTTCTGCTGGTCAAAGCTTTGATGGTGTAGCTAAAGTT	TCAAAGCTTTGATGGTGTAGCTAAA 0.29264 1	repeat_sense,igr_sense, NM_105382.3,NM_117705.2,NM_127151.1,NM_202573.1,NM_101415.2,NM_121535.2,NM_127095.1,NM_123771.3,NM_103377.1,NM_128745.1,NM_115800.3,NM_123678.1,NM_102062.1,NM_103376.1,NM_110979.1,NM_179610.1,NM_202574.1,NM_179615.1,NM_105052.2,NM_112202.3,NM_124220.1,NM_104478.3,NM_128384.3,NM_127653.3,NM_115638.1,NM_122821.1,NM_118042.1,NM_116925.1,NM_128655.3, 2332
647 24 NC_003076:11789309-11789401:-1	GTGGTGATGTCCTCTGCTCGACCTGGGGGTCGAGTGGTCTCTTGAGGTCTTGAAGCTCCTACTCGACCTCTGGGTCGAGTGGTTTGTCACGAT	CTACTCGACCTCTGGGTCGAGTGGT 0.128758 0	repeat_sense,igr_sense, NM_122820.1,NM_126793.1,NM_103358.1,NM_180584.1,NM_116794.1,NM_113972.1,NM_148798.1,NM_148247.1,NM_111050.1,NM_122819.1,NM_103339.1,NM_122890.1,NM_103391.1,NM_148526.1,NM_147956.1,NM_114067.1,NM_126888.1,NM_201713.1,NM_148782.1,NM_180576.1,NM_179436.1,NM_116802.1,NM_126833.1,NM_147987.1,NM_103342.1,NM_147971.1,NM_202235.1,NM_126781.1,NM_122822.1,NM_122889.1,NM_103402.1,NM_…
648 24 NC_003076:11789361-11789438:-1	GAGGGCACTCGACCTCGTGGTCGAGTGGTGAAGTGAAGTGGTGATGTCCTCTGCTCGACCTGGGGGTCGAGTGGTCTC	CTGCTCGACCTGGGGGTCGAGTGGT 0.317168 0	repeat_sense,igr_sense, NM_126793.1,NM_103358.1,NM_180584.1,NM_116794.1,NM_113972.1,NM_201705.1,NM_148798.1,NM_148247.1,NM_103339.1,NM_103391.1,NM_148526.1,NM_147956.1,NM_126888.1,NM_201713.1,NM_148782.1,NM_179436.1,NM_116802.1,NM_126833.1,NM_147987.1,NM_103342.1,NM_202235.1,NM_126781.1,NM_122822.1,NM_113973.1,NM_179432.1,NM_122821.1,NM_120741.2,NM_126773.1,NM_147965.1, 984
649 24 NC_003076:11798473-11798565:-1	GTGGTGATGTCCTCTGCTCGACCTGGGGGTCGAGTGGTCTCTTGAGGTCTTGAAGCTCCTACTCGACCTCTGGGTCGAGTGGTTTGTCACGAT	CTACTCGACCTCTGGGTCGAGTGGT 0.167622 0	repeat_sense,igr_sense, NM_122820.1,NM_126793.1,NM_103358.1,NM_180584.1,NM_116794.1,NM_113972.1,NM_148798.1,NM_148247.1,NM_111050.1,NM_122819.1,NM_103339.1,NM_122890.1,NM_103391.1,NM_148526.1,NM_147956.1,NM_114067.1,NM_126888.1,NM_201713.1,NM_148782.1,NM_180576.1,NM_179436.1,NM_116802.1,NM_126833.1,NM_147987.1,NM_103342.1,NM_147971.1,NM_202235.1,NM_126781.1,NM_122822.1,NM_122889.1,NM_103402.1,NM_…
650 24 NC_003076:11798525-11798602:-1	GAGGGCACTCGACCTCATGGTCGAGTGGTGAAGTGAAGTGGTGATGTCCTCTGCTCGACCTGGGGGTCGAGTGGTCTC	CTGCTCGACCTGGGGGTCGAGTGGT 0.375458 0	repeat_sense,igr_sense, NM_126793.1,NM_103358.1,NM_180584.1,NM_116794.1,NM_113972.1,NM_201705.1,NM_148798.1,NM_148247.1,NM_103339.1,NM_103391.1,NM_148526.1,NM_147956.1,NM_126888.1,NM_201713.1,NM_148782.1,NM_179436.1,NM_116802.1,NM_126833.1,NM_147987.1,NM_103342.1,NM_202235.1,NM_126781.1,NM_122822.1,NM_113973.1,NM_179432.1,NM_122821.1,NM_120741.2,NM_126773.1,NM_147965.1, 984
651 24 NC_003076:11848249-11848328:-1	CTGAGGTTACTCGACCTGGTGGTCGAGTGGACGGGAAGAATGGCTCCAAAGTCACTCGACCTGGGGGTCGAGTATGTGGG	CACTCGACCTGGGGGTCGAGTA 0.467101 0	repeat_sense,cds_antisense,exon_antisense, NM_126793.1,NM_122830.1,NM_103358.1,NM_180584.1,NM_116794.1,NM_113972.1,NM_201705.1,NM_148798.1,NM_148247.1,NM_122819.1,NM_103339.1,NM_103391.1,NM_148526.1,NM_147956.1,NM_126888.1,NM_201713.1,NM_148782.1,NM_179436.1,NM_116802.1,NM_126833.1,NM_147987.1,NM_103342.1,NM_202235.1,NM_126781.1,NM_122822.1,NM_113973.1,NM_179432.1,NM_122821.1,NM_126773.1,NM_14796…
652 24 NC_003076:11857874-11857953:-1	CTGAGGTTACTCGACCTGGTGGTCGAGTGGACGGGAAGAATGGCTCCAAAGTCACTCGACCTGGGGGTCGAGTATGTGGG	CACTCGACCTGGGGGTCGAGTA 0.467101 0	repeat_sense,igr_sense, NM_126793.1,NM_122830.1,NM_103358.1,NM_180584.1,NM_116794.1,NM_113972.1,NM_201705.1,NM_148798.1,NM_148247.1,NM_122819.1,NM_103339.1,NM_103391.1,NM_148526.1,NM_147956.1,NM_126888.1,NM_201713.1,NM_148782.1,NM_179436.1,NM_116802.1,NM_126833.1,NM_147987.1,NM_103342.1,NM_202235.1,NM_126781.1,NM_122822.1,NM_113973.1,NM_179432.1,NM_122821.1,NM_126773.1,NM_147965.1, 1071
653 24 NC_003076:11867497-11867576:-1	CTGAGGTTACTCGACCTGGTGGTCGAGTGGACGGGAAGAATGGCTCCAAAGTCACTCGACCTAGGGGTCGAGTATGTGGG	TCACTCGACCTAGGGGTCGAGTA 0.496969 0	repeat_sense,igr_sense, NM_126793.1,NM_103358.1,NM_180584.1,NM_116794.1,NM_113972.1,NM_201705.1,NM_148798.1,NM_148247.1,NM_122819.1,NM_103339.1,NM_103391.1,NM_148526.1,NM_147956.1,NM_126888.1,NM_201713.1,NM_179436.1,NM_116802.1,NM_126833.1,NM_147987.1,NM_103342.1,NM_202235.1,NM_126781.1,NM_122822.1,NM_113973.1,NM_179432.1,NM_122821.1,NM_126773.1,NM_147965.1, 1084
654 24 NC_003076:11934183-11934300:-1	ATACTCGACCAGGGGGTCGAGTGGCGTCATCGAGTGGACTGAGCTGGGGTTACTCGACCTGGGGGTCGAGTAGATGGGAAGAATGGCTCCAAAGTCACTCGACCAGGGGGTCGAGTAT	ACTCGACCAGGGGGTCGAGT 0.200116 0	repeat_sense,igr_sense, NM_126793.1,NM_103358.1,NM_122817.1,NM_180584.1,NM_116794.1,NM_113972.1,NM_201705.1,NM_148798.1,NM_148247.1,NM_103339.1,NM_122890.1,NM_119847.2,NM_103391.1,NM_148526.1,NM_147956.1,NM_126888.1,NM_201713.1,NM_148782.1,NM_180576.1,NM_179436.1,NM_122815.1,NM_116802.1,NM_126833.1,NM_147987.1,NM_103342.1,NM_147971.1,NM_202235.1,NM_126781.1,NM_122822.1,NM_122889.1,NM_113973.1,NM_…
655 24 NC_003076:11943793-11943910:-1	ATACTCGACCAGGGGGTCGAGTGGCGTCATCGAGTGGCCTGAGCTGAGGTTACTCGACCTGGGGGTCAAGTAGATGGGAAGATTGGCTCCAAAGTCACTCGACCCGGGGGTCGAGTAT	ACTCGACCCGGGGGTCGAGT 0.250899 1	repeat_sense,igr_sense, NM_122820.1,NM_126793.1,NM_103358.1,NM_180584.1,NM_116794.1,NM_113972.1,NM_201705.1,NM_148798.1,NM_148247.1,NM_118534.3,NM_103339.1,NM_103391.1,NM_126651.1,NM_148526.1,NM_147956.1,NM_114067.1,NM_126888.1,NM_201713.1,NM_148782.1,NM_180576.1,NM_179436.1,NM_116802.1,NM_126833.1,NM_147987.1,NM_103342.1,NM_147971.1,NM_202235.1,NM_126781.1,NM_122822.1,NM_113973.1,NM_179432.1,NM_…
656 24 NC_003076:11993430-11993513:-1	TTTGTGATACTCGACCAGGGGGTCGAGTGGTGGTGAGAAGTTGTGATGCCTTCTACTCGACCAGGGGGTCGAGTGGTGAACAAG	TCTACTCGACCAGGGGGTCGAGTGGT 0.761442 0	repeat_sense,igr_sense, NM_126793.1,NM_103358.1,NM_122817.1,NM_180584.1,NM_116794.1,NM_113972.1,NM_201705.1,NM_148798.1,NM_148247.1,NM_103339.1,NM_122890.1,NM_119847.2,NM_103391.1,NM_148526.1,NM_147956.1,NM_126888.1,NM_201713.1,NM_148782.1,NM_180576.1,NM_179436.1,NM_122815.1,NM_116802.1,NM_126833.1,NM_147987.1,NM_103342.1,NM_147971.1,NM_202235.1,NM_126781.1,NM_122822.1,NM_122889.1,NM_113973.1,NM_…
657 38 NC_003076:12018439-12018525:-1	ATCGACACCCTATTGGTGTCGGTCGACACTGTCGCGTTCTGTAGTGTCTACCGTGGCTGGTGTCGATCGACACCCAGTAGTGTCGGT	CTGGTGTCGATCGACACCCAG 0.342918 1	repeat_sense,igr_sense, NM_114016.1,NM_126896.1,NM_116452.2,NM_126950.1,NM_147252.1,NM_148529.1,NM_114074.1,NM_114079.1,NM_148282.1,NM_114102.1,NM_148519.1,NM_103410.1,NM_122848.1,NM_126918.1, 629
658 24 NC_003076:12024642-12024828:-1	GGTGAAAGCACTCGACCTGGGGGTCGAGCGAGGTGATCGAGTGGTGTCAGAAGATACTCGACTTCCAGGTGGAGTGAAGAGGTCGAGTGGTGAAGTGAAGTGGTGATGTCCTATGCTCGACCTGGGGGTCGAGTGGTCTCTTGGGATCTTGAAGCTCCTGCTCGACCTCTTGGTCGAGTGGTTTGTC	CTCGACCTCTTGGTCGAGTGGT 0.338676 1	repeat_sense,intron_sense, NM_122820.1,NM_126793.1,NM_103358.1,NM_180584.1,NM_116794.1,NM_113972.1,NM_201705.1,NM_148798.1,NM_148247.1,NM_122819.1,NM_103339.1,NM_103391.1,NM_147956.1,NM_114067.1,NM_126888.1,NM_201713.1,NM_148782.1,NM_180576.1,NM_116802.1,NM_126833.1,NM_147987.1,NM_103342.1,NM_147971.1,NM_202235.1,NM_126781.1,NM_113973.1,NM_179432.1,NM_147959.1,NM_180578.1,NM_126773.1,NM_147965.1,…
659 24 NC_003076:12024681-12024786:-1	GGTGTCAGAAGATACTCGACTTCCAGGTGGAGTGAAGAGGTCGAGTGGTGAAGTGAAGTGGTGATGTCCTATGCTCGACCTGGGGGTCGAGTGGTCTCTTGGGATC	TGCTCGACCTGGGGGTCGAGTGGTCT 0.353307 1	repeat_sense,intron_sense, NM_126793.1,NM_103358.1,NM_180584.1,NM_116794.1,NM_113972.1,NM_201705.1,NM_148798.1,NM_148247.1,NM_103339.1,NM_103391.1,NM_148526.1,NM_147956.1,NM_126888.1,NM_201713.1,NM_148782.1,NM_179436.1,NM_116802.1,NM_126833.1,NM_147987.1,NM_103342.1,NM_202235.1,NM_126781.1,NM_122822.1,NM_113973.1,NM_179432.1,NM_122821.1,NM_120741.2,NM_126773.1,NM_147965.1, 988
660 24 NC_003076:12024687-12024829:-1	AGGTGAAAGCACTCGACCTGGGGGTCGAGCGAGGTGATCGAGTGGTGTCAGAAGATACTCGACTTCCAGGTGGAGTGAAGAGGTCGAGTGGTGAAGTGAAGTGGTGATGTCCTATGCTCGACCTGGGGGTCGAGTGGTCTCTT	ATGCTCGACCTGGGGGTCGAGTG 0.662325 1	repeat_sense,intron_sense, NM_126793.1,NM_103358.1,NM_180584.1,NM_116794.1,NM_113972.1,NM_201705.1,NM_148798.1,NM_148247.1,NM_103339.1,NM_103391.1,NM_148526.1,NM_147956.1,NM_126888.1,NM_201713.1,NM_148782.1,NM_179436.1,NM_116802.1,NM_126833.1,NM_147987.1,NM_103342.1,NM_202235.1,NM_126781.1,NM_122822.1,NM_113973.1,NM_179432.1,NM_122821.1,NM_126773.1,NM_147965.1, 976
661 24 NC_003076:12034281-12034460:-1	AAGGCACTCGACCTGGGGGTCGAGTGAGGTGATCGAGTGGTGTTAGAAGATACTCGACTTCCAGGTGGAGTGAAGAGGTCGAGTGGTGAAGTGAAGTGGTGATGTCCTATGCTCGACCTGGGGGTCGATTGGTCTCTTGGGATCTTGAAGCTCCTGCTCGACCTCTTGGTCGAGTGGTTT	CTCGACCTCTTGGTCGAGTG 0.572373 0	repeat_sense,igr_sense, NM_126793.1,NM_103358.1,NM_180584.1,NM_116794.1,NM_113972.1,NM_201705.1,NM_148798.1,NM_148247.1,NM_122819.1,NM_103339.1,NM_103391.1,NM_147956.1,NM_114067.1,NM_126888.1,NM_201713.1,NM_148782.1,NM_180576.1,NM_116802.1,NM_126833.1,NM_147987.1,NM_103342.1,NM_147971.1,NM_202235.1,NM_126781.1,NM_113973.1,NM_179432.1,NM_147959.1,NM_180578.1,NM_126773.1,NM_147965.1, 472
662 24 NC_003076:12047894-12048018:-1	GAGACCACTCGACCCCCAGGTCGAGCAGAGGACATCACCACTTCACTTCACCACTCGACCACGAGGTCGAGTGCCCTCGTCTCCATCACTCGATCACTTCACTCGACCATGAGGTCGAGTGTCTT	CACTCGACCATGAGGTCGAGTG 0.212476 1	repeat_sense,cds_antisense,exon_antisense, NM_126793.1,NM_103358.1,NM_180584.1,NM_116794.1,NM_103414.1,NM_201705.1,NM_148798.1,NM_148247.1,NM_122819.1,NM_103339.1,NM_122890.1,NM_103391.1,NM_148526.1,NM_147956.1,NM_114067.1,NM_126888.1,NM_201713.1,NM_148782.1,NM_180576.1,NM_179436.1,NM_116802.1,NM_126833.1,NM_147987.1,NM_103342.1,NM_147971.1,NM_202235.1,NM_126781.1,NM_122822.1,NM_122889.1,NM_12282…
663 24 NC_003076:12060163-12060287:-1	GAGACCACTCGACCCCCAGGTCGAGCAGAGGACATCACCACTTCACTTCACCACTCGAACACGAGGTCGAGTGCCCTCGTCTCCATCACTCGATCACTTCACTCGACCATGAGGTCGAGTGTCTT	CACTCGACCATGAGGTCGAGTG 0.208485 1	repeat_sense,cds_antisense,exon_antisense, NM_126793.1,NM_103358.1,NM_180584.1,NM_116794.1,NM_103414.1,NM_201705.1,NM_148798.1,NM_148247.1,NM_122819.1,NM_103339.1,NM_122890.1,NM_103391.1,NM_148526.1,NM_147956.1,NM_114067.1,NM_126888.1,NM_201713.1,NM_148782.1,NM_180576.1,NM_179436.1,NM_116802.1,NM_126833.1,NM_147987.1,NM_103342.1,NM_147971.1,NM_202235.1,NM_126781.1,NM_122822.1,NM_122889.1,NM_12282…
664 24 NC_003076:12117960-12118037:-1	GAGACCACTCGACCCCCAGGTCGAGCAGAGGACATCACCACTTCACTTCACCACTCGACCACGAGGTCGAGTGCCCTC	CCACTCGACCACGAGGTCGAGTGC 0.383559 0	repeat_sense,igr_sense, NM_122820.1,NM_117954.1,NM_126793.1,NM_103358.1,NM_113671.2,NM_180584.1,NM_116794.1,NM_113972.1,NM_201705.1,NM_148798.1,NM_148247.1,NM_122819.1,NM_103339.1,NM_122890.1,NM_103391.1,NM_148526.1,NM_147956.1,NM_114067.1,NM_126888.1,NM_201713.1,NM_148782.1,NM_180576.1,NM_179436.1,NM_100205.3,NM_116802.1,NM_126833.1,NM_147987.1,NM_114100.1,NM_103342.1,NM_147971.1,NM_202235.1,NM_…
665 100 NC_003076:12285764-12285905:-1	AACGATCGGGAATGAGAGAGAACACTGCAAATTAACCCCTTATCAATGCTCTTACCAATTACGATCCAAGCTGAATCGATTACTCTCCATCCATTGAATTTGGATCTCTAATTTGCAGTGTTCTCTCTCATTCCCGATCGTT	GTTCTCTCTCATTCCCGATCG 1.47368 1	igr_sense, NM_116381.2,NM_105567.1,NM_120551.2,NM_100876.3,NM_100470.3,NM_112558.3,NM_120385.2, 7
666 24 NC_003076:12367479-12367556:-1	GAGACCACTCGACCCCCTGGTCGAGCAGAGGACATCACCACTTCACTTCACCACTCGACCACGAGGTCGAGTGCCCTC	CCACTCGACCACGAGGTCGAGTG 0.799805 0	exon_sense,repeat_sense,cds_sense, NM_122820.1,NM_117954.1,NM_126793.1,NM_103358.1,NM_113671.2,NM_180584.1,NM_116794.1,NM_113972.1,NM_201705.1,NM_148798.1,NM_148247.1,NM_122819.1,NM_103339.1,NM_122890.1,NM_103391.1,NM_148526.1,NM_147956.1,NM_114067.1,NM_126888.1,NM_201713.1,NM_148782.1,NM_180576.1,NM_179436.1,NM_100205.3,NM_116802.1,NM_126833.1,NM_147987.1,NM_114100.1,NM_103342.1,NM_147971.1,NM_2…
667 24 NC_003076:12413555-12413623:-1	ATACTCGACCTAGGGGTCGAGTAGATGGGAAGAATGGCTCCAAAGTCACTCGACCAGGGGGTCGAGTAT	CACTCGACCAGGGGGTCGAGT 0.059965 0	repeat_sense,igr_sense, NM_126793.1,NM_103358.1,NM_122817.1,NM_180584.1,NM_116794.1,NM_113972.1,NM_201705.1,NM_148798.1,NM_148247.1,NM_103339.1,NM_122890.1,NM_119847.2,NM_103391.1,NM_148526.1,NM_147956.1,NM_126888.1,NM_201713.1,NM_148782.1,NM_180576.1,NM_179436.1,NM_122815.1,NM_116802.1,NM_126833.1,NM_147987.1,NM_103342.1,NM_147971.1,NM_202235.1,NM_126781.1,NM_122822.1,NM_122889.1,NM_113973.1,NM_…
668 24 NC_003076:12427517-12427585:-1	ATACTCGACCTAAGGGTCGAGTAGATGGGTAGAATGGCTCCAAAGTCACTCGACCAGGGGGTCGAGTAT	CACTCGACCAGGGGGTCGAGT 0.218139 0	repeat_sense,igr_sense, NM_126793.1,NM_103358.1,NM_122817.1,NM_180584.1,NM_116794.1,NM_113972.1,NM_201705.1,NM_148798.1,NM_148247.1,NM_103339.1,NM_122890.1,NM_119847.2,NM_103391.1,NM_148526.1,NM_147956.1,NM_126888.1,NM_201713.1,NM_148782.1,NM_180576.1,NM_179436.1,NM_122815.1,NM_116802.1,NM_126833.1,NM_147987.1,NM_103342.1,NM_147971.1,NM_202235.1,NM_126781.1,NM_122822.1,NM_122889.1,NM_113973.1,NM_…
669 24 NC_003076:12430923-12430991:-1	ATACTCGACCTAAGGGTCGAGTAGATGGGAAGAATGGCTCCAAAGTCACTCGACCAGGGGGTCGAGTAT	CACTCGACCAGGGGGTCGAGT 0.147462 0	repeat_sense,igr_sense, NM_126793.1,NM_103358.1,NM_122817.1,NM_180584.1,NM_116794.1,NM_113972.1,NM_201705.1,NM_148798.1,NM_148247.1,NM_103339.1,NM_122890.1,NM_119847.2,NM_103391.1,NM_148526.1,NM_147956.1,NM_126888.1,NM_201713.1,NM_148782.1,NM_180576.1,NM_179436.1,NM_122815.1,NM_116802.1,NM_126833.1,NM_147987.1,NM_103342.1,NM_147971.1,NM_202235.1,NM_126781.1,NM_122822.1,NM_122889.1,NM_113973.1,NM_…
670 24 NC_003076:12434331-12434399:-1	ATACTCGACCTAGGGGTCGAGTAGATGGGAAGAATGACTTCAAAGTCACTCGACCAGGGGGTCGAGTAT	CACTCGACCAGGGGGTCGAGT 0.181524 0	repeat_sense,igr_sense, NM_126793.1,NM_103358.1,NM_122817.1,NM_180584.1,NM_116794.1,NM_113972.1,NM_201705.1,NM_148798.1,NM_148247.1,NM_103339.1,NM_122890.1,NM_119847.2,NM_103391.1,NM_148526.1,NM_147956.1,NM_126888.1,NM_201713.1,NM_148782.1,NM_180576.1,NM_179436.1,NM_122815.1,NM_116802.1,NM_126833.1,NM_147987.1,NM_103342.1,NM_147971.1,NM_202235.1,NM_126781.1,NM_122822.1,NM_122889.1,NM_113973.1,NM_…
671 358 NC_003076:12445033-12445152:-1	TTGGCAATGGGATGAAGTCACTCGACCTGGGGGTCGAGTGATGTGATCGAGTGGTGGTCAAAAGATGGAGGTGAAGTCACTCGACCTGGGGGTCGAGTGATGTGATCGAGTGGTGGTCAA	GGTCGAGTGATGTGATCGAGT 0.0183751 0	repeat_sense,igr_sense, NM_122905.1,NM_126793.1,NM_103358.1,NM_180584.1,NM_147973.1,NM_116794.1,NM_180583.1,NM_113972.1,NM_201705.1,NM_148798.1,NM_148247.1,NM_103339.1,NM_103391.1,NM_148526.1,NM_147956.1,NM_201713.1,NM_179436.1,NM_116802.1,NM_126833.1,NM_147987.1,NM_103342.1,NM_202235.1,NM_126781.1,NM_147980.1,NM_122828.1,NM_113973.1,NM_179432.1,NM_111971.1,NM_126773.1,NM_147965.1, 378
672 24 NC_003076:12445046-12445142:-1	GATGAAGTCACTCGACCTGGGGGTCGAGTGATGTGATCGAGTGGTGGTCAAAAGATGGAGGTGAAGTCACTCGACCTGGGGGTCGAGTGATGTGATC	CACTCGACCTGGGGGTCGAGTGATGT 0.83326 1	repeat_sense,igr_sense, NM_129770.2,NM_126793.1,NM_122830.1,NM_103358.1,NM_180584.1,NM_116794.1,NM_113972.1,NM_201705.1,NM_148798.1,NM_148247.1,NM_122819.1,NM_103339.1,NM_103391.1,NM_148526.1,NM_147956.1,NM_126888.1,NM_201713.1,NM_148782.1,NM_179436.1,NM_116802.1,NM_126833.1,NM_147987.1,NM_103342.1,NM_202235.1,NM_126781.1,NM_122822.1,NM_113973.1,NM_179432.1,NM_122821.1,NM_126773.1,NM_147965.1, 11…
673 24 NC_003076:12445046-12445142:-1	GATGAAGTCACTCGACCTGGGGGTCGAGTGATGTGATCGAGTGGTGGTCAAAAGATGGAGGTGAAGTCACTCGACCTGGGGGTCGAGTGATGTGATC	AAGTCACTCGACCTGGGGGTCGAGTG 0.677314 1	repeat_sense,igr_sense, NM_126793.1,NM_122830.1,NM_103358.1,NM_180584.1,NM_116794.1,NM_113972.1,NM_201705.1,NM_148798.1,NM_148247.1,NM_122819.1,NM_103339.1,NM_103391.1,NM_148526.1,NM_147956.1,NM_126888.1,NM_201713.1,NM_148782.1,NM_179436.1,NM_116802.1,NM_126833.1,NM_147987.1,NM_103342.1,NM_202235.1,NM_126781.1,NM_122822.1,NM_113973.1,NM_179432.1,NM_122821.1,NM_126773.1,NM_147965.1, 1101
674 24 NC_003076:12452220-12452317:-1	TGATGATGATACTCAACATCCAGGTGGAGTGATGAGGTCGAGTGAAGGTCTGGCAATGGGATGAAGTCACTCGACCTGGGAGTCGAGTGACGTGATCG	TCACTCGACCTGGGAGTCGAGTGA 0.230654 0	repeat_sense,igr_sense, NM_126793.1,NM_122830.1,NM_103358.1,NM_180584.1,NM_116794.1,NM_113972.1,NM_201705.1,NM_148798.1,NM_148247.1,NM_118534.3,NM_122819.1,NM_103339.1,NM_103391.1,NM_126651.1,NM_148526.1,NM_147956.1,NM_126888.1,NM_148782.1,NM_179436.1,NM_116802.1,NM_126833.1,NM_147987.1,NM_103342.1,NM_202235.1,NM_126781.1,NM_113973.1,NM_179432.1,NM_126773.1,NM_147965.1, 716
675 359 NC_003076:12512425-12512535:-1	AAAAAAAAATGTTCCCCAGTTCGGGATCGATCGATCCAAAACTCATCCACGAAGTAAAATCGTCTGCTAGAACGGGAACGATCGATCCCGAGCTGGCGGACATTGTTTTTT	ATCCCGAGCTGGCGGACATT 1.26123 1	igr_sense, NM_101094.1, 6
676 24 NC_003076:12657032-12657111:-1	GTCCCATACTCGACCAGGGGGTCGAGTGGTCTATTGAGGTCATGAAGCTTCTACTCGACCTCGGGGTCGAGTGGTTTGAC	TCTACTCGACCTCGGGGTCGAGTGGT 0.342723 0	repeat_sense,igr_sense, NM_122820.1,NM_126793.1,NM_103358.1,NM_180584.1,NM_116794.1,NM_113972.1,NM_201705.1,NM_148798.1,NM_148247.1,NM_122819.1,NM_103339.1,NM_122890.1,NM_103391.1,NM_148526.1,NM_147956.1,NM_114067.1,NM_126888.1,NM_148782.1,NM_180576.1,NM_201718.1,NM_179436.1,NM_116802.1,NM_126833.1,NM_147987.1,NM_103342.1,NM_147971.1,NM_202235.1,NM_126781.1,NM_122822.1,NM_122889.1,NM_113973.1,NM_…
677 24 NC_003076:12657078-12657158:-1	GTGGTGGTACTCGGCCAGGGGGTCGAGTGATGAGATGAAATTGTGAAGTCCCATACTCGACCAGGGGGTCGAGTGGTCTAT	ATACTCGACCAGGGGGTCGAGTGGT 0.336729 0	repeat_sense,igr_sense, NM_126793.1,NM_103358.1,NM_122817.1,NM_180584.1,NM_116794.1,NM_113972.1,NM_201705.1,NM_148798.1,NM_148247.1,NM_103339.1,NM_122890.1,NM_119847.2,NM_103391.1,NM_148526.1,NM_147956.1,NM_126888.1,NM_201713.1,NM_148782.1,NM_180576.1,NM_179436.1,NM_122815.1,NM_116802.1,NM_126833.1,NM_147987.1,NM_103342.1,NM_147971.1,NM_202235.1,NM_126781.1,NM_122822.1,NM_122889.1,NM_113973.1,NM_…
678 360 NC_003076:12657289-12657380:-1	GATGTCGAGTGAATAGATGGAGTCTTCTTTTCTTCCTTGTGCTCGAGTGTCTAGTTGAGTGCGGAATGGAGAAGACTCTGAAGCTCGACATC	GAAGACTCTGAAGCTCGACA 0.0369132 0	repeat_sense,igr_sense, NM_116794.1,NM_113972.1,NM_201705.1,NM_148798.1,NM_147956.1,NM_126888.1,NM_147987.1,NM_103342.1,NM_202235.1,NM_126781.1,NM_122828.1,NM_113973.1,NM_179432.1,NM_117501.2,NM_124056.1,NM_147965.1, 55
679 24 NC_003076:12666659-12666757:-1	TGATGGTGATACTCGACTTCCAGGTAGAGTGGTGTGATCGAGTGATGGTCAGGTGGTGGAGCTGAAGACACTCGACCTGGGGGTCGAGTGAAGTGATCG	TCGACCTGGGGGTCGAGTGA 0.00648543 0	repeat_sense,igr_sense, NM_126793.1,NM_103358.1,NM_180584.1,NM_116794.1,NM_113972.1,NM_201705.1,NM_148798.1,NM_148247.1,NM_103339.1,NM_103391.1,NM_148526.1,NM_147956.1,NM_126888.1,NM_201713.1,NM_148782.1,NM_179436.1,NM_116802.1,NM_126833.1,NM_147987.1,NM_103342.1,NM_202235.1,NM_126781.1,NM_113973.1,NM_179432.1,NM_126773.1,NM_147965.1, 646
680 361 NC_003076:15775338-15775415:-1	AAGATGCAAAATGACGACTCCGACAACAATAAGTATTAGTTTTGTATTATTGTTGTCCGAGTCGTCATTTTGCTTCTT	ATTGTTGTCCGAGTCGTCAT 0.504647 0	igr_sense, NM_101937.3,NM_120781.1,NM_122636.3,NM_130202.1, 4
681 126 ath-MIR319b NC_003076:16677697-16677868:-1	AGAGAGCTTTCTTCGGTCCACTCATGGAGTAATATGTGAGATTTAATTGACTCTCGACTCATTCATCCAAATACCAAATGAAAGAATTTGTTCTCATATGGTAAATGAATGAATGATGCGAGAGACAAATTGAGTCTTCACTTCTCTATGCTTGGACTGAAGGGAGCTCCCT	TTGGACTGAAGGGAGCTCCC 1	igr_sense, HASH(0xf9c7eb8) NM_111977.3,NM_101286.2,NM_180448.1,NM_128252.1,NM_120692.2, 7
682 122 ath-MIR166e NC_003076:16792748-16792890:-1	TTGAGGGGAATGTTGTCTGGCACGAGGCCCTTAACTTAGATCTATATTTGATTATATATATATGTCTCTTCTTTATTCATTAGTCTATACATGAATGATCATTTTACGGTTAATGACGTCGGACCAGGCTTCATTCCCCTCAA	TCGGACCAGGCTTCATTCCCC 0.208939 1	igr_sense, HASH(0xf9c7cf0) NM_104096.2,NM_124302.1,NM_179464.1,NM_119441.3,NM_129025.2,NM_102785.3,NM_125462.2,NM_106374.2, 11
683 98 NC_003076:16988001-16988132:-1	ACCGTTAACACTCCTTAACAGCGCTCCTAACAGCCGTTACAAAACATGGCCTAACAGCCGTTATTGTTGGTTTAAGGACAAAAACAGTTGTTAGTTACGCTGTTAGGAGAGCTGTTAAGAAGTGTTAATGGT	GTTAGGAGAGCTGTTAAGAAG 0.231478 1	repeat_sense,igr_sense, NM_114951.2,NM_124625.2,NM_128849.1,NM_102048.1, 26
684 362 NC_003076:20368389-20368484:-1	TGTTTTAAAAACCGGACCGGTCCGGTCCTGCAGACCAAGAATCGTTCATGTGGCTGAAATTGGGATGAACCGGTATCTGGTCCGGTTTCTAAAACA	ACCGGTATCTGGTCCGGTTTC 0.148873 1	igr_sense, NM_123279.1,NM_100573.3,NM_111792.2,NM_123282.1,NM_120092.3,NM_121744.2,NM_123276.1, 5
685 363 NC_003076:22598069-22598196:-1	CCGGATCGGATCCGGTCCGCGGATACTCGTACTTTTTCACAGACTTCAGGATCCCGAATATCCGAGGTTGGCAGATACGGATCCAGAGACTGAAATGACGGATCCGCCGGATACGGATCCGGATCCGG	CCGGATACGGATCCGGATCC 0.0447118 0	exon_sense,cds_sense, NM_111107.1,NM_111488.1,NM_122605.1,NM_124961.1,NM_124559.2,NM_127392.1,NM_180177.1,NM_125388.2,NM_180898.1,NM_122402.2,NM_103996.3,NM_102402.3,NM_118198.2,NM_124558.1,NM_130006.2,NM_202244.1,NM_127539.2,NM_114861.2,NM_111258.3,NM_128425.1,NM_147888.2,NM_125365.2,NM_119192.3,NM_129624.4,NM_148575.1,NM_115413.3,NM_123505.2,NM_124191.2,NM_119126.2, 38
686 364 NC_003076:22722039-22722141:-1	TGTTAAGAAGGATACTTTCCTTACTAGATTATCATGTATATTCTAAAGGAATATACACTAGAATATACATGATAATCTAGTAAGGAAAGTATCCTTCTTAACA	AAGGAAAGTATCCTTCTTAA 0.175043 0	cds_antisense,exon_antisense, NM_119710.3,NM_111980.2,NM_119664.2,NM_121877.1,NM_113451.2,NM_124988.1,NM_105570.1,NM_179168.1,NM_130293.2,NM_179166.1,NM_179167.1,NM_202555.1, 5
687 365 NC_003076:23814863-23814936:-1	GTATTGGGAGATATCTGAGATCGACCCAAACCAAATCGACTCGGTTAGGGTCGATCTCATCGATCTCCCAATAT	TCGATCTCATCGATCTCCCA 0.506965 0	igr_sense, NM_104293.2,NM_127860.1,NM_128902.2,NM_105187.2,NM_112741.1, 8
688 366 NC_003076:23899471-23899595:-1	GTGGATACTGTTCTGGTGGAGGATACTTCACCGGCGGATGAGGGTAAGTCTTGATCGGTGGTGGATACTTCACCGGTGGATGCTCGTATGGTGGCGGTGGATACTTCTTGATCGGTGGTGGATAC	TGGCGGTGGATACTTCTTGATCGG 0.102176 0	cds_antisense,exon_antisense, NM_099993.1,NM_102906.3,NM_130365.2,NM_125307.2,NM_125681.1,NM_112207.2,NM_113329.1,NM_117418.1, 11
689 367 NC_003076:24005692-24005829:-1	TAGCCATGTATTTGCTGATGCAGCATCATCAAGATTCCCACTCGATAAGGAACCCTTTTCTGCGGATCGAGAGGCGAAAGCAAAGGGAACCACATCTCTTGTGAATCTTAATGGTGCTGCATCTGCGACTACTGGCTG	ATGGTGCTGCATCTGCGACT 0.36206 1	igr_sense, NM_105514.2,NM_112774.2,NM_114911.1,NM_111422.2, 2
690 116 NC_003076:24220545-24220703:-1	AAAGTTTCTGCTAGAACCATTAGCAGGAAGATCCGTTTGTGATATCTAGAGATTTCTGATGGCTATGAGACATTTGTATCTATCTTGATAAGATTGTTATCTGAGTATAAGCTGTATGCTCTTCGTGATTTTCCTGCTAATGGTTCTAGCAGAAACTTT	TCCTGCTAATGGTTCTAGCAGAA 0.804742 1	igr_sense, NM_120341.2,NM_102664.3,NM_106594.2,NM_119923.2,NM_125249.2,NM_105839.2,NM_112178.2,NM_128089.2,NM_101806.2,NM_180142.1, 6
691 70 NC_003076:24712572-24712727:-1	CCGCTACCGCCCGCAACCGCAAACGCTTGCGGGAAGGAGCTTTTGAAAACGGGCGATTTCGAGCGGCCCAAAGCGATGTCTAGCGGTTTTTATGATTGGTGTCAATCGCTAACAACCGCTACCAACCGCAAACGCTGCGTTTGCGGGTGGTAGAGG	CTGCGTTTGCGGGTGGTAGA 0.725312 0	igr_sense, NM_125712.1,NM_111039.2,NM_179277.1,NM_100680.3, 51
692 368 NC_003076:26035099-26035175:-1	TAGACGGAGACAATATCTGTTTATAGTGTCCTTGACGAACAATGTCTGGGAAATTGAGACGAGCGTTGTCTCCTCTG	AAATTGAGACGAGCGTTGTCTCC 0.108325 0	cds_antisense,exon_antisense, NM_121553.2,NM_104678.1,NM_105814.2,NM_105113.3,NM_125912.1,NM_148628.1,NM_123982.1,NM_112693.2,NM_129310.2, 4
693 82 ath-MIR170 NC_003076:26428816-26428888:-1	CCTCTGATATTGGCCTGGTTCACTCAGATTCTCTTTTACTAACTCATCTGATTGAGCCGTGTCAATATCTCAG	TGATTGAGCCGTGTCAATATC 0	igr_sense, HASH(0xfa22448) NM_130079.2,NM_115927.4,NM_115399.2,NM_116232.4, 8
694 369 NC_003070:615878-615972:1	CAGAGTTGCTTCTCCAAGTCATTCTCTGGTTTGGAGGAAGCTTTCCGGATCTTTGACCTTCGAAGAAGAGAATGGACTTGGAGAGAGCGTCTTTG	CTTCTCCAAGTCATTCTCTG 0.419875 1	cds_antisense,exon_antisense, NM_101544.1,NM_121210.2,NM_100159.2,NM_128892.2,NM_147942.1,NM_102537.2,NM_116462.2,NM_121060.2,NM_112110.2,NM_105009.2,NM_125838.2,NM_100170.2,NM_102226.2,NM_105556.3,NM_102106.3,NM_123641.2,NM_124756.2,NM_202157.1,NM_113774.2, 8
695 137 NC_003070:1456725-1456862:1	TTCATTTGATTTGGGGCTTTGAGAATTTCTGGCCCATCCAACCCAAATCTGTTAAAGGTTGCCGACCACACCTTTCAATATTGGCCAGAGAAAGTGTGGCGATGGCCCAGAAAATCTCAAAGCCCCAAATCCAATGAA	TTGGGGCTTTGAGAATTTCTGGC 0.659781 1	igr_sense, NM_104435.2,NM_111570.1,NM_124606.1,NM_148578.1,NM_106172.2,NM_180101.1,NM_179515.1,NM_102515.1, 19
696 370 NC_003070:2130308-2130377:1	GACGAAATTGCCCTCTTCTGCAGCAGAAGATAATGCTCCATCTTCCATTTCACGGAGGGCAGTTGCAGTT	TTGCCCTCTTCTGCAGCAGA 0.347667 0	cds_antisense,exon_antisense, NM_123975.1,NM_105770.4,NM_101353.1,NM_100568.2,NM_100703.2, 2
697 371 NC_003070:3546867-3547030:1	AAAGTTGTTTGTTTGCCTATCGCTGATTCAGCGACAAAAATTAGCGACAGTCGCCAGCGACTGCAATTTTTAGTCGCTGAAATTTTTAGCGATCAGTCGTTGGTTTCAGCGATTAGTTGCTGCTTTTGGTCGCTGGATCCAGCGACATGCAAACGAACAACTTT	GTTTGCCTATCGCTGATTCAGCGAC 0.399813 1	igr_sense, NM_102610.2,NM_112615.3,NM_123424.1,NM_122975.2,NM_100528.1,NM_128095.2, 10
698 141 NC_003070:3933285-3933374:1	TGGATTGTACATCACTTTTAGTGTACAAATGTAAAGTGTACACTGTGTATTTTTATATATATTTGTACACTAAAAGTGATGTACAATCTA	TTGTACATCACTTTTAGTGT 0.187648 1	igr_sense, NM_113788.1,NM_117297.1,NM_103055.2,NM_120159.2,NM_100774.1, 35
699 372 NC_003070:5035928-5036034:1	TGGAGAATGAGCTCTCGAAAAGAAGAACAGGGAGAAAAACAGCCAAAAGTAGGTCAGGGTTGATACCATTCCCTGTAAAGTTGCCATTTTTTAGAGCTCGTAATCTA	AATGAGCTCTCGAAAAGAAGA 0.517158 0	cds_antisense,exon_antisense, NM_115353.3,NM_122852.2,NM_106686.2,NM_179937.2,NM_112134.2,NM_115330.1,NM_127543.1,NM_179938.1,NM_105936.2,NM_126259.3,NM_127777.2,NM_101333.3, 7
700 373 NC_003070:6251681-6251816:1	TGTTCCTGTTGCCGTAGCTGCAGCGGCTGTTGTTGCGTCTTCCATGGTTGTTGCTGCCGCCAAGTCAGCAAACTCGGATTCCTCCACTTTAGAACTTTCTGCTGCAGCTGCTGCTGCAGTTATGGCGACAGCTGCA	TGTTGCCGTAGCTGCAGCGGC 1.06711 1	exon_sense,cds_sense, NM_113696.2,NM_100715.2,NM_100638.3,NM_113113.3,NM_106332.2,NM_202374.1,NM_105460.3,NM_130015.2,NM_123613.2, 4
701 374 NC_003070:6251686-6251811:1	CTGTTGCCGTAGCTGCAGCGGCTGTTGTTGCGTCTTCCATGGTTGTTGCTGCCGCCAAGTCAGCAAACTCGGATTCCTCCACTTTAGAACTTTCTGCTGCAGCTGCTGCTGCAGTTATGGCGACAG	CGTAGCTGCAGCGGCTGTTG 0.209137 1	exon_sense,cds_sense, NM_180853.1,NM_120530.1,NM_202374.1,NM_180181.2,NM_104622.2,NM_112455.3,NM_105460.3,NM_202416.1,NM_124742.2,NM_106164.3,NM_120834.2,NM_122524.2,NM_111330.3,NM_114966.2,NM_118919.1,NM_125969.2, 3
702 151 ath-MIR394a NC_003070:7058184-7058300:1	CTTACAGTCATCTTTGGCATTCTGTCCACCTCCTTCTATACATATATGCATGTGTATATATATATGCGTTTCGTGTGAAAGAAGGAGGTGGGTATACTGCCAATAGAGATCTGTTAG	TTGGCATTCTGTCCACCTCC 1	igr_sense, HASH(0xfa5a81c) NM_102496.3,NM_118162.1,NM_122065.2,NM_118411.2,NM_125851.3,NM_180470.1,NM_202865.1,NM_100014.3,NM_121004.2, 5
703 375 NC_003070:7192816-7192895:1	GAGAACTACGAGAAGTGGATTGGAGCAATTCGCGTTGTTGATAAATGGGCGGGAAAATTCGACCCCTTTTCGAGTTTCTC	GAGAAGTGGATTGGAGCAATTC 0.075409 0	igr_sense, NM_148029.1,NM_127604.2,NM_113508.1,NM_101743.2,NM_113410.1, 3
704 376 NC_003070:7297686-7297848:1	TTCCTGCAGCTTCTTGATACGTCCCATGTAATCTTGATCTTCAACACAGAGACTCACTGCTTTAGCATCCGCACCAGGACCATCGTACTGTAGCGGTCCTGGGTTTCTGTACAGATCTTCCATCAAGAATTTTTGTGCATTCTGTCTCAAGAGGCTGCAAGAA	CAGCTTCTTGATACGTCCCA 0.703671 0	cds_antisense,exon_antisense, NM_101948.2,NM_118728.3,NM_105929.3,NM_124986.3, 2
705 377 NC_003070:7423505-7423602:1	TTTCAAATTAGAGTTTTCTGGATACTTATTAGTTACTAACAAAGAGAGGGCTTCTTCGATATTAACTTTTAAGTATCCAGAAAACTCTAAATTTGAAA	ATTAGAGTTTTCTGGATACT 0.644226 1	igr_sense, NM_122255.1,NM_100293.2,NM_106570.2,NM_125087.2, 6
706 378 NC_003070:8234537-8234646:1	GGTGGTGAGCACCATCTTCGTTGCTCTCTGGCTGGAGAGTGGTGATATTGGCGAGGTATGAGGCTAAGTCGAGAGTCTTGGTGAGAGTGACGGAGATGGCGGCTCGAGCC	CACCATCTTCGTTGCTCTCT 0.457577 1	cds_antisense,exon_antisense, NM_120996.2,NM_179467.1,NM_100090.3,NM_104128.2,NM_122134.2,NM_125940.1,NM_102169.2,NM_113352.2,NM_105630.2,NM_128525.1,NM_100139.3,NM_114786.3,NM_106747.1,NM_202011.1,NM_128527.3,NM_104052.1,NM_114901.2,NM_124396.2,NM_120645.2,NM_102483.1,NM_202012.1,NM_127940.1, 12
707 379 NC_003070:10730549-10730675:1	GCAGTCAATGCAACTTAATGAACCAGCGTGGATAGGTTACATCTATGCAATCTCAATCTTTGTTGGAGTGGTATGCAACAAATTCTCTTTTTCTTCGCTGCCTTTATTATTCTCTTGCATGGACTGC	CGCAGTCAATGCAACTTAAT 0.0517274 0	exon_sense,cds_sense, NM_117594.1,NM_113563.2,NM_105228.2,NM_124207.1,NM_128406.1,NM_104866.1, 2
708 13 ath-MIR167d NC_003070:11137521-11137895:1	GTTGGTTTTTAGAAGCTGAAGCTGCCAGCATGATCTGGTAATCGCTACATACGACATACACACATCACTAAACTTCTTTATAATTTATGCACACACATACAGCTCTTAATGGCCACAACTCAAAGTTATAATTAGTGCATGATCTCTAGTTATTTGACTGCTTTTAATATATGTTTATGGATTCACGCATGTGTGTGTATGTACATAATTTACATGCATGCACTTTGTGTATGGTACACATCAATTTGAACCCGTTCAAAATTCTGTTTTTATTAGTATATATATAGATGTATGTGGTGTGTGTGTCAGTGTGTGTGTGTGTTTATAGATAGTAGTACTAGGTCATCCTGCAGCTTCAGTCACTAAATCACCAAC	TGAAGCTGCCAGCATGATCTGG 1	igr_sense, HASH(0xfa9cc90) NM_102771.2,NM_103940.1,NM_113884.2,NM_122002.2,NM_124210.1,NM_112853.3,NM_180523.1, 5
709 380 ath-MIR400 NC_003070:11785917-11786014:1	GAGGATTGTTTATGAGAGTATTATAAGTCACTACATTTGGTAAGCAAAGTGTTGTTTCTCAAACGAAGTGACTTATGATAATCTCATGAATGGATTTT	TATGAGAGTATTATAAGTCAC 1	igr_sense, NM_101102.1,NM_105133.1,NM_105019.1,NM_113236.2,NM_118802.1,NM_126613.3,NM_112471.2,NM_104969.2,NM_100086.3,NM_113146.1,NM_118128.1,NM_104949.1,NM_201700.1,NM_100537.2,NM_122227.2,NM_124038.2,NM_105012.1,NM_104964.1,NM_118064.1,NM_104971.1,NM_102143.1,NM_104993.1,NM_104991.2,NM_100864.1,NM_121248.2,NM_123333.1,NM_128429.2,NM_127241.4,NM_104985.1,NM_106602.1,NM_104986.1,NM_117238.1,NM_1…
710 381 NC_003070:11942723-11942785:1	ATTGCTACCGGAGCATTCCATGCAGTCGCAAAGGGCATTGTAGTTGTTTGTGCTGGTGGTAAT	GCTACCGGAGCATTCCATGC 0.340289 1	exon_sense,cds_sense, NM_102884.1,NM_117439.2,NM_129310.2, 6
711 382 NC_003070:13186801-13186981:1	ATGATATGATGCTGCGATAGAGTGGTTTTGGTGTGTCATATCCAAGCACGATCAAGCTCGGAAGTTCAAAGGTCTTTCACATCCTTTGGAAGTTCTACTCGATCCCCATTCCATCACCATACTCGATCTCATCTCCATATCATCACTTCACCAAAACCACTCTATCGCAGCATCATATCAT	GCTGCGATAGAGTGGTTTTG 0.769332 1	repeat_sense,igr_sense, NM_179004.1,NM_179005.1,NM_113967.1,NM_147279.1,NM_179006.1,NM_148517.1,NM_201715.1,NM_114069.1,NM_180580.1, 71
712 3 NC_003070:13574873-13574984:1	TCCTCGCAAAAGTTGCGAGGGATTTGCAATGAATATTTCTATAGCAAACCTGCGAGGGAGTTGCAAGTTCCAGCGATCGTAGTAGCAAATCCCTCGCAATGTTTGCGATGGA	TCGCAAAAGTTGCGAGGGAT 0.433011 1	repeat_sense,igr_sense, NM_179750.2,NM_104162.1,NM_100450.1,NM_179749.1, 78
713 25 NC_003070:13794940-13795043:1	GATGACGCCACTCGACCCCCTTGTCGAGTATCACTTCGCCACACCACCTGACCACACTCGGTTTCACTCTACCAAGTTACTCGACCCCCTGGTCGAGTATCATC	ACTCGACCCCCTTGTCGAGTA 0.0896884 0	repeat_sense,igr_sense, NM_122820.1,NM_113972.1,NM_113511.3,NM_122819.1,NM_122890.1,NM_103391.1,NM_114067.1,NM_180576.1,NM_147987.1,NM_114100.1,NM_147971.1,NM_202235.1,NM_126781.1,NM_122889.1,NM_113973.1,NM_179432.1,NM_147959.1,NM_180578.1, 608
714 25 NC_003070:13799191-13799281:1	TGATTTCTTTTACTCGACCTGGGGGTCGAGTGGTCTCTTGAGATCTTGAAGCTCCTACTCGACCTCGGGTTCGAGTGGTTTGACATGATCA	TTACTCGACCTGGGGGTCGAGTGG 1.12539 1	repeat_sense,igr_sense, NM_126793.1,NM_122830.1,NM_103358.1,NM_180584.1,NM_116794.1,NM_113972.1,NM_201705.1,NM_148798.1,NM_148247.1,NM_122819.1,NM_103339.1,NM_103391.1,NM_148526.1,NM_147956.1,NM_126888.1,NM_201713.1,NM_148782.1,NM_179436.1,NM_116802.1,NM_126833.1,NM_147987.1,NM_103342.1,NM_202235.1,NM_126781.1,NM_122822.1,NM_113973.1,NM_179432.1,NM_122821.1,NM_120741.2,NM_126773.1,NM_147965.1, 11…
715 25 NC_003070:13865521-13865626:1	GTGATGATACTTGACCAGGGGGTCGAGTAACTTGGTAGAGTGAATGGTCGAGTGATGGTGATGGTGTGGCGAAGTGATACTCGACCAGGGGGTCGAGTAGTGTCAT	TACTTGACCAGGGGGTCGAGTA 0.684794 0	repeat_sense,cds_antisense,exon_antisense, NM_126793.1,NM_103358.1,NM_180584.1,NM_116794.1,NM_201705.1,NM_148798.1,NM_148247.1,NM_103339.1,NM_103391.1,NM_148526.1,NM_147956.1,NM_148782.1,NM_179436.1,NM_116802.1,NM_126833.1,NM_147987.1,NM_103342.1,NM_202235.1,NM_126781.1,NM_122822.1,NM_179432.1,NM_122821.1,NM_126773.1,NM_147965.1, 613
716 25 NC_003070:13865637-13865726:1	GAGCTGAGGTTACTCGACCTGGTGGTCGAGTGGATGGGAAGAATAGCTTCAAAGTCACTCGACCAGGGGGTCGAGTATGTCTTCTGGTTC	GTTACTCGACCTGGTGGTCGAGTGG 1.16619 1	repeat_sense,cds_antisense,exon_antisense, NM_122820.1,NM_126793.1,NM_122830.1,NM_103358.1,NM_122817.1,NM_180584.1,NM_116794.1,NM_113972.1,NM_201705.1,NM_148798.1,NM_148247.1,NM_122819.1,NM_103339.1,NM_103391.1,NM_148526.1,NM_147956.1,NM_114067.1,NM_126888.1,NM_201713.1,NM_148782.1,NM_179436.1,NM_122815.1,NM_116802.1,NM_126833.1,NM_147987.1,NM_103342.1,NM_112861.2,NM_202235.1,NM_126781.1,NM_12282…
717 25 NC_003070:13865642-13865720:1	GAGGTTACTCGACCTGGTGGTCGAGTGGATGGGAAGAATAGCTTCAAAGTCACTCGACCAGGGGGTCGAGTATGTCTTC	CTCGACCTGGTGGTCGAGTGG 0.835916 0	repeat_sense,cds_antisense,exon_antisense, NM_126793.1,NM_103358.1,NM_122817.1,NM_180584.1,NM_116794.1,NM_113972.1,NM_201705.1,NM_148798.1,NM_148247.1,NM_103339.1,NM_103391.1,NM_148526.1,NM_147956.1,NM_114067.1,NM_126888.1,NM_201713.1,NM_148782.1,NM_179436.1,NM_122815.1,NM_116802.1,NM_126833.1,NM_147987.1,NM_103342.1,NM_202235.1,NM_126781.1,NM_122822.1,NM_113973.1,NM_179432.1,NM_122821.1,NM_12677…
718 95 NC_003070:13922619-13922731:1	GAGGTGAATTGGTGATGTCTTCTACTCGACCTGGGGGTCGAGTGGTCTCTTGAGATCTTGAAGCTCCTACTCGACCTCTGGGTCGAGTGGTTTGTCATGATCAGGTCCGCTTC	TGGTGATGTCTTCTACTCGACCTGG 0.374036 1	repeat_sense,cds_antisense,exon_antisense, NM_116792.2,NM_202631.1,NM_179101.1,NM_116794.1,NM_113972.1,NM_148798.1,NM_118556.3,NM_101330.1,NM_103391.1,NM_147956.1,NM_105044.2,NM_126833.1,NM_147987.1,NM_103342.1,NM_129352.2,NM_202235.1,NM_121568.2,NM_126781.1,NM_118925.2,NM_122971.1,NM_113973.1,NM_179432.1,NM_113453.2,NM_126773.1,NM_147965.1, 152
719 25 NC_003070:13922640-13922708:1	CTACTCGACCTGGGGGTCGAGTGGTCTCTTGAGATCTTGAAGCTCCTACTCGACCTCTGGGTCGAGTGG	CTCGACCTGGGGGTCGAGTGGT 0.165088 1	repeat_sense,cds_antisense,exon_antisense, NM_126793.1,NM_103358.1,NM_180584.1,NM_116794.1,NM_113972.1,NM_201705.1,NM_148798.1,NM_148247.1,NM_103339.1,NM_103391.1,NM_148526.1,NM_147956.1,NM_126888.1,NM_201713.1,NM_148782.1,NM_179436.1,NM_116802.1,NM_126833.1,NM_147987.1,NM_103342.1,NM_202235.1,NM_126781.1,NM_122822.1,NM_113973.1,NM_179432.1,NM_122821.1,NM_120741.2,NM_126773.1,NM_147965.1, 971
720 25 NC_003070:14085247-14085432:1	TACTCGACCCCCAGGTCGAGTGACTTTGGAGCCATTCTTCCCATCCACTCGACCACCAGGTCGAGTAACCTCAGCTCAGGCCACTCGATGACACTACTCGACCCCCTGGTCGAGTATCACTTCGCCACACCATCACCATCACTCGACCATTCGCTCTACCAAGTTACTCGACCCCCTGGTCGAGTA	ATACTCGACCCCCAGGTCGAGTG 0.329588 0	exon_sense,repeat_sense,cds_sense, NM_122820.1,NM_116794.1,NM_113972.1,NM_148798.1,NM_122819.1,NM_122890.1,NM_103391.1,NM_147956.1,NM_114067.1,NM_126888.1,NM_148782.1,NM_180576.1,NM_126833.1,NM_147987.1,NM_114100.1,NM_103342.1,NM_147971.1,NM_130308.2,NM_202235.1,NM_126781.1,NM_122822.1,NM_122889.1,NM_122828.1,NM_113973.1,NM_179432.1,NM_147959.1,NM_122821.1,NM_180578.1,NM_126773.1,NM_147965.1, 1072
721 25 NC_003070:14249238-14249310:1	GACCACTCGACCCCCTGGTCGAGTAGAGGACACCACCACTTCACCTCACCACTCGACCCCGAGGTCGAGTGTC	ACTCGACCCCCTGGTCGAGTA 0.225742 1	repeat_sense,igr_sense, NM_122820.1,NM_103358.1,NM_180584.1,NM_116794.1,NM_113972.1,NM_201705.1,NM_148798.1,NM_122819.1,NM_103339.1,NM_122890.1,NM_103391.1,NM_114067.1,NM_126888.1,NM_148782.1,NM_180576.1,NM_116802.1,NM_126833.1,NM_147987.1,NM_114100.1,NM_103342.1,NM_147971.1,NM_202235.1,NM_126781.1,NM_122822.1,NM_122889.1,NM_103402.1,NM_113973.1,NM_179432.1,NM_147959.1,NM_122821.1,NM_180578.1,NM_…
722 25 NC_003070:15045092-15045162:1	TACTCGACCAGGGGGTCGAGTAATGTCGTCGAGTGGCCTGAGCTGAGGTTACTCGACCTGGTGGTCGAGTG	GTACTCGACCAGGGGGTCGAGTA 0.542714 0	repeat_sense,igr_sense, NM_126793.1,NM_123660.2,NM_103358.1,NM_122817.1,NM_180584.1,NM_116794.1,NM_113972.1,NM_201705.1,NM_148798.1,NM_148247.1,NM_103339.1,NM_122890.1,NM_119847.2,NM_103391.1,NM_148526.1,NM_147956.1,NM_126888.1,NM_201713.1,NM_148782.1,NM_180576.1,NM_123420.1,NM_179436.1,NM_122815.1,NM_116802.1,NM_126833.1,NM_147987.1,NM_103342.1,NM_147971.1,NM_202235.1,NM_126781.1,NM_122822.1,NM_…
723 25 NC_003070:15054902-15054968:1	TACTCGACCTGGTGGTCGAGTGGACGGGAAGAATGGCTCCAAAGTCACTCGACCTGGGGGTCGAGTA	TCGACCTGGTGGTCGAGTGG 0.0494009 0	repeat_sense,igr_sense, NM_126793.1,NM_103358.1,NM_122817.1,NM_180584.1,NM_116794.1,NM_113972.1,NM_201705.1,NM_148798.1,NM_148247.1,NM_103339.1,NM_103391.1,NM_147956.1,NM_126888.1,NM_201713.1,NM_148782.1,NM_179436.1,NM_122815.1,NM_116802.1,NM_126833.1,NM_147987.1,NM_103342.1,NM_202235.1,NM_126781.1,NM_113973.1,NM_179432.1,NM_126773.1,NM_147965.1, 474
724 25 NC_003070:15063998-15064066:1	CTACTCGACCTGGGGGTCGAGTGGTCTCTTGAGATCTTGAAGATCCTACTCGACCTCGGGGTCGAGTGG	CTCGACCTGGGGGTCGAGTGGT 0.0879174 0	repeat_sense,igr_sense, NM_126793.1,NM_103358.1,NM_180584.1,NM_116794.1,NM_113972.1,NM_201705.1,NM_148798.1,NM_148247.1,NM_103339.1,NM_103391.1,NM_148526.1,NM_147956.1,NM_126888.1,NM_201713.1,NM_148782.1,NM_179436.1,NM_116802.1,NM_126833.1,NM_147987.1,NM_103342.1,NM_202235.1,NM_126781.1,NM_122822.1,NM_113973.1,NM_179432.1,NM_122821.1,NM_120741.2,NM_126773.1,NM_147965.1, 971
725 25 NC_003070:15067478-15067556:1	GGAGACGCTCGACCTCGTGGTCGAGTGGTGAGGTGAAGTGGTGATGTCTTCTACTCGACCTCGGGGTCGAGTGGTCTCT	GCTCGACCTCGTGGTCGAGTGGT 0.433201 1	repeat_sense,igr_sense, NM_122820.1,NM_126793.1,NM_103358.1,NM_180584.1,NM_116794.1,NM_113972.1,NM_201705.1,NM_148798.1,NM_148247.1,NM_122819.1,NM_103339.1,NM_103391.1,NM_148526.1,NM_147956.1,NM_114067.1,NM_126888.1,NM_201713.1,NM_148782.1,NM_180576.1,NM_179436.1,NM_116802.1,NM_126833.1,NM_147987.1,NM_103342.1,NM_147971.1,NM_202235.1,NM_126781.1,NM_122822.1,NM_113973.1,NM_179432.1,NM_147959.1,NM_…
726 25 NC_003070:15067517-15067608:1	GGTGATGTCTTCTACTCGACCTCGGGGTCGAGTGGTCTCTTGAGATCTTGAAGCTTCTACTCGACCTCTGGGTCGAGTGGTTTGTCATGATC	TCTACTCGACCTCGGGGTCGAGTGGT 1.32603 0	repeat_sense,igr_sense, NM_122820.1,NM_126793.1,NM_103358.1,NM_180584.1,NM_116794.1,NM_113972.1,NM_201705.1,NM_148798.1,NM_148247.1,NM_122819.1,NM_103339.1,NM_122890.1,NM_103391.1,NM_148526.1,NM_147956.1,NM_114067.1,NM_126888.1,NM_148782.1,NM_180576.1,NM_201718.1,NM_179436.1,NM_116802.1,NM_126833.1,NM_147987.1,NM_103342.1,NM_147971.1,NM_202235.1,NM_126781.1,NM_122822.1,NM_122889.1,NM_113973.1,NM_…
727 25 NC_003070:15067521-15067604:1	ATGTCTTCTACTCGACCTCGGGGTCGAGTGGTCTCTTGAGATCTTGAAGCTTCTACTCGACCTCTGGGTCGAGTGGTTTGTCAT	CTCGACCTCGGGGTCGAGTGGT 0.909619 0	repeat_sense,igr_sense, NM_126793.1,NM_103358.1,NM_180584.1,NM_116794.1,NM_113972.1,NM_201705.1,NM_148798.1,NM_148247.1,NM_122819.1,NM_103339.1,NM_103391.1,NM_148526.1,NM_147956.1,NM_114067.1,NM_126888.1,NM_148782.1,NM_180576.1,NM_201718.1,NM_179436.1,NM_116802.1,NM_126833.1,NM_147987.1,NM_103342.1,NM_147971.1,NM_202235.1,NM_126781.1,NM_122822.1,NM_113973.1,NM_179432.1,NM_147959.1,NM_122821.1,NM_…
728 25 NC_003070:15078236-15078327:1	GGTGATGTCTTCTACTCGACCTGGGGGTCGAGTGGTGTCTTGAGATCTTGAAGCTTCTACTCGACCTCTGGGTCGAATGGTTTGTCATGATC	TCTACTCGACCTGGGGGTCGAGTG 0.25275 0	repeat_sense,igr_sense, NM_126793.1,NM_122830.1,NM_103358.1,NM_180584.1,NM_116794.1,NM_113972.1,NM_201705.1,NM_148798.1,NM_148247.1,NM_122819.1,NM_103339.1,NM_103391.1,NM_148526.1,NM_147956.1,NM_126888.1,NM_201713.1,NM_148782.1,NM_179436.1,NM_116802.1,NM_126833.1,NM_147987.1,NM_103342.1,NM_202235.1,NM_126781.1,NM_122822.1,NM_113973.1,NM_179432.1,NM_122821.1,NM_126773.1,NM_147965.1, 1104
729 115 NC_003070:15192130-15192214:1	GGATTTGTCCTGAGTACTCTCTTCCAAGTTTATTCACACAGTGGACTGTGTGATTTAAGTTTGGGGGAGGGCTCAGGAAGTGTGT	GTCCTGAGTACTCTCTTCCA 0.221342 0	repeat_sense,igr_sense, NM_114965.2,NM_119730.2,NM_102696.1,NM_128559.2,NM_102697.1, 141
730 25 NC_003070:15435118-15435245:1	GATGAGGACACTCGACCTCGTGGTCGAGTGGTGAGGTGAAGTGGTGATTTCTTCTACTCGACCTGGGGGTCGAGTGGTCTCTTGAGATCTTGAAGCTCCTAGTCGACCTCGGGGTCGAGTGCTTTGAC	ACTCGACCTCGTGGTCGAGTGGTG 0.59316 1	repeat_sense,cds_antisense,exon_antisense, NM_122820.1,NM_126793.1,NM_103358.1,NM_180584.1,NM_116794.1,NM_113972.1,NM_201705.1,NM_148798.1,NM_148247.1,NM_122819.1,NM_103339.1,NM_122890.1,NM_103391.1,NM_148526.1,NM_147956.1,NM_114067.1,NM_126888.1,NM_201713.1,NM_148782.1,NM_180576.1,NM_179436.1,NM_116802.1,NM_126833.1,NM_147987.1,NM_114100.1,NM_103342.1,NM_147971.1,NM_202235.1,NM_126781.1,NM_12282…
731 25 NC_003070:15449228-15449296:1	CTACTCGACCTGGGGGTCGAGTGGTCTCTTGATATCTTGAAGCTCCTACTCGACCTCTGGGTCGAGTGG	CTCGACCTGGGGGTCGAGTGGT 0.0842948 1	repeat_sense,igr_sense, NM_126793.1,NM_103358.1,NM_180584.1,NM_116794.1,NM_113972.1,NM_201705.1,NM_148798.1,NM_148247.1,NM_103339.1,NM_103391.1,NM_148526.1,NM_147956.1,NM_126888.1,NM_201713.1,NM_148782.1,NM_179436.1,NM_116802.1,NM_126833.1,NM_147987.1,NM_103342.1,NM_202235.1,NM_126781.1,NM_122822.1,NM_113973.1,NM_179432.1,NM_122821.1,NM_120741.2,NM_126773.1,NM_147965.1, 971
732 25 NC_003070:15456468-15456536:1	CTACTCGACCTGGGGGTCGAGTGGTCTCTTGAGATCTTGAAGCTCCTACTTGACCTCTAGGTCGAGTGG	CTCGACCTGGGGGTCGAGTGGT 0.0869883 1	repeat_sense,igr_sense, NM_126793.1,NM_103358.1,NM_180584.1,NM_116794.1,NM_113972.1,NM_201705.1,NM_148798.1,NM_148247.1,NM_103339.1,NM_103391.1,NM_148526.1,NM_147956.1,NM_126888.1,NM_201713.1,NM_148782.1,NM_179436.1,NM_116802.1,NM_126833.1,NM_147987.1,NM_103342.1,NM_202235.1,NM_126781.1,NM_122822.1,NM_113973.1,NM_179432.1,NM_122821.1,NM_120741.2,NM_126773.1,NM_147965.1, 971
733 25 NC_003070:15486081-15486186:1	GATGACACTACTCGACCCCCTGGTCGAGTATCACTTCGCCACACCACCTGACAACACTCGACCAATCACTCTACCAAGTTACTCGACCCCCTGGTCGAGTATCATC	ACTACTCGACCCCCTGGTCGAGTA 0.624363 0	repeat_sense,igr_sense, NM_122820.1,NM_103358.1,NM_180584.1,NM_116794.1,NM_113972.1,NM_201705.1,NM_148798.1,NM_122819.1,NM_103339.1,NM_122890.1,NM_103391.1,NM_114067.1,NM_126888.1,NM_148782.1,NM_180576.1,NM_116802.1,NM_126833.1,NM_147987.1,NM_114100.1,NM_103342.1,NM_147971.1,NM_148010.1,NM_202235.1,NM_126781.1,NM_122822.1,NM_122889.1,NM_103402.1,NM_113973.1,NM_179432.1,NM_147959.1,NM_122821.1,NM_…
734 25 NC_003070:15548327-15548401:1	AGACACTCGACCTCGGGGTCGAGTGGTGAGGTGAAGTGGTGATGTCCTCTACTCGACCAGGGGGTCGAGTGGTCT	CACTCGACCTCGGGGTCGAGTGGT 0.516775 1	repeat_sense,igr_sense, NM_122820.1,NM_118048.1,NM_122997.1,NM_126793.1,NM_103358.1,NM_113671.2,NM_180584.1,NM_116794.1,NM_113972.1,NM_201705.1,NM_148798.1,NM_148247.1,NM_122819.1,NM_103339.1,NM_122890.1,NM_103391.1,NM_148526.1,NM_147956.1,NM_114067.1,NM_126888.1,NM_148782.1,NM_180576.1,NM_201718.1,NM_179436.1,NM_116802.1,NM_126833.1,NM_147987.1,NM_103342.1,NM_147971.1,NM_103206.1,NM_202235.1,NM_…
735 25 NC_003070:15620169-15620231:1	CTCGACATGGGGGTCGAGTGGTCTCTTGAAATCTTGAAGCTCCTACTCGACCTCTGGGTCGAG	TACTCGACATGGGGGTCGAGTGG 0.0262125 0	repeat_sense,igr_sense, NM_126793.1,NM_103358.1,NM_180584.1,NM_116794.1,NM_113972.1,NM_201705.1,NM_148798.1,NM_148247.1,NM_103339.1,NM_103391.1,NM_104420.1,NM_148526.1,NM_147956.1,NM_126888.1,NM_201713.1,NM_148782.1,NM_179436.1,NM_116802.1,NM_126833.1,NM_147987.1,NM_103342.1,NM_202235.1,NM_126781.1,NM_113973.1,NM_179432.1,NM_120741.2,NM_126773.1,NM_147965.1, 696
736 25 NC_003070:15717108-15717230:1	AGACACTCGACCAGGTGGTCGAGTGAAGTGATCGAATGACTCTCGTGGTGGTACTCGGCCAGAGGGTCGAGTGATGAGGCGAAGTGGTGAAGTCCTATACTCGACCAGGGGGTCGAGTGGTCT	CACTCGACCAGGTGGTCGAGTGA 0.441996 1	repeat_sense,igr_sense, NM_122820.1,NM_126793.1,NM_103358.1,NM_122817.1,NM_180584.1,NM_116794.1,NM_113972.1,NM_201705.1,NM_148798.1,NM_148247.1,NM_120418.2,NM_103339.1,NM_122890.1,NM_103391.1,NM_148526.1,NM_147956.1,NM_114067.1,NM_126888.1,NM_201713.1,NM_117794.1,NM_148782.1,NM_180576.1,NM_123420.1,NM_179436.1,NM_122815.1,NM_116802.1,NM_126833.1,NM_122143.1,NM_147987.1,NM_103342.1,NM_147971.1,NM_…
737 25 NC_003070:15788532-15788666:1	GAGCTGAGGTTACTCGACCTGGTGGTCGAGTGGATGGGAAGAATGGCTCCAAAGTCACTCGACCTGGGGGTCGAGTATGTGGGAAGAATGGCTCCAAAGTCACTCGACCTGGGGGTCGAGTATGTCTTCTAGTTC	GTTACTCGACCTGGTGGTCGAGTGG 1.50332 1	repeat_sense,igr_sense, NM_122820.1,NM_126793.1,NM_122830.1,NM_103358.1,NM_122817.1,NM_180584.1,NM_116794.1,NM_113972.1,NM_201705.1,NM_148798.1,NM_148247.1,NM_122819.1,NM_103339.1,NM_103391.1,NM_148526.1,NM_147956.1,NM_114067.1,NM_126888.1,NM_201713.1,NM_148782.1,NM_179436.1,NM_122815.1,NM_116802.1,NM_126833.1,NM_147987.1,NM_103342.1,NM_112861.2,NM_202235.1,NM_126781.1,NM_122822.1,NM_113973.1,NM_…
738 25 NC_003070:15788534-15788664:1	GCTGAGGTTACTCGACCTGGTGGTCGAGTGGATGGGAAGAATGGCTCCAAAGTCACTCGACCTGGGGGTCGAGTATGTGGGAAGAATGGCTCCAAAGTCACTCGACCTGGGGGTCGAGTATGTCTTCTAGT	CTCGACCTGGTGGTCGAGTGG 1.22334 0	repeat_sense,igr_sense, NM_126793.1,NM_103358.1,NM_122817.1,NM_180584.1,NM_116794.1,NM_113972.1,NM_201705.1,NM_148798.1,NM_148247.1,NM_103339.1,NM_103391.1,NM_148526.1,NM_147956.1,NM_114067.1,NM_126888.1,NM_201713.1,NM_148782.1,NM_179436.1,NM_122815.1,NM_116802.1,NM_126833.1,NM_147987.1,NM_103342.1,NM_202235.1,NM_126781.1,NM_122822.1,NM_113973.1,NM_179432.1,NM_122821.1,NM_126773.1,NM_147965.1, 834
739 3 NC_003070:15953435-15953523:1	CCGCTAATGCCTCGCAAAATTTGCGATGGATTTGCGTGGCTTTTATCTGTAGTCGCAAATCCGTAGCAAAGTTTGCGATGGATTCGCGG	CCTCGCAAAATTTGCGATGGA 0.38564 1	repeat_sense,igr_sense, NM_104162.1,NM_147313.1,NM_122762.1, 119
740 17 NC_003070:15956927-15957068:1	GTCCCTCGTAAATCCCCCGCAAATTGCGAGGGACTTGCGTGGGGCGTAGTAATTCCCACGCAAAGCTGTAGGGTTACACACTTACGAGGAAGCGTGTATTCGTCGTAAATCCCTCGCAAATTGCTAGGGGTTTGCGAGGGAC	AATCCCCCGCAAATTGCGAGG 0.582747 1	repeat_sense,igr_sense, NM_115236.3,NM_128872.2,NM_128826.3, 24
741 383 NC_003070:16003173-16003285:1	TGCATTGCATATTTCTGAAACAAAGCAAAAGCAAAAAAAAATGTATTATGCTCTTGTATTGTGGTCGTTGTAATTTTTATTTTTTTTGCTTTGTTTCAGAAATATGCAATGCA	ATTTCTGAAACAAAGCAAAAGC 0.507026 1	igr_sense, NM_103036.2,NM_102976.1,NM_125359.3,NM_180638.2,NM_114766.1,NM_112614.2,NM_106197.1,NM_105993.2,NM_123847.2,NM_103072.2,NM_124315.1,NM_103700.2,NM_106080.2,NM_123698.2,NM_117663.3,NM_124092.2,NM_106453.2,NM_126982.1,NM_121569.2,NM_118959.3,NM_129437.1,NM_104989.2,NM_202229.1,NM_127469.1,NM_106077.2,NM_101610.2,NM_202346.1,NM_201899.1, 43
742 384 NC_003070:16210471-16210547:1	GATTAGATTCCACCCTGAGGAGATTATGCCAAGTTCTAACTCTTGGAAAAATGTGTTTGTTCTGGTGGAATTTAATC	TTCCACCCTGAGGAGATTATG 0.598022 0	repeat_sense,igr_sense, NM_100076.2,NM_103364.2, 6
743 21 NC_003070:16740616-16740793:1	CCGCCAAAAGCGTAAACCTGTAATTTTCCCGCCAAAAACTCGTAACGTTATGAATTTTTTTGGCGTGAAAATTCCGGGTTTACGCTTTTGGCGGGAAAATTCCGGGTTTTGGTTTTTGGCGGAAAAATTACAGGTTTACGCTTTTGGCGGGAAAATTACAGGTTTACGCTTTTGGCGG	CGTAAACCTGTAATTTTCCCGCCA 0.558792 1	repeat_sense,igr_sense, NM_105880.3,NM_101150.3,NM_113719.1,NM_115101.1,NM_122278.2,NM_148235.1,NM_122992.1,NM_119921.1,NM_120650.2,NM_123000.1,NM_122977.1,NM_117922.2, 670
744 21 NC_003070:16740621-16740788:1	AAAAGCGTAAACCTGTAATTTTCCCGCCAAAAACTCGTAACGTTATGAATTTTTTTGGCGTGAAAATTCCGGGTTTACGCTTTTGGCGGGAAAATTCCGGGTTTTGGTTTTTGGCGGAAAAATTACAGGTTTACGCTTTTGGCGGGAAAATTACAGGTTTACGCTTTT	ACCTGTAATTTTCCCGCCAAAAAC 0.863105 1	repeat_sense,igr_sense, NM_118845.1,NM_125545.2,NM_122979.1,NM_104152.2,NM_101206.3,NM_121623.1,NM_124369.2,NM_113719.1,NM_115101.1,NM_103002.1,NM_148235.1,NM_122992.1,NM_119921.1,NM_123000.1,NM_122977.1,NM_124384.1, 1084
745 21 NC_003070:16740625-16740784:1	GCGTAAACCTGTAATTTTCCCGCCAAAAACTCGTAACGTTATGAATTTTTTTGGCGTGAAAATTCCGGGTTTACGCTTTTGGCGGGAAAATTCCGGGTTTTGGTTTTTGGCGGAAAAATTACAGGTTTACGCTTTTGGCGGGAAAATTACAGGTTTACGC	GTAATTTTCCCGCCAAAAACT 0.341278 1	repeat_sense,igr_sense, NM_118845.1,NM_125545.2,NM_122979.1,NM_101206.3,NM_113719.1,NM_115101.1,NM_103002.1,NM_148235.1,NM_122992.1,NM_119921.1,NM_123000.1,NM_101797.3,NM_122977.1,NM_180615.1, 1026
746 385 NC_003070:17027574-17027680:1	TTTGTTTGTTTAGCTGAAGAAGCAGAGGAGTCGGCATTGGGGCACAGTCACTCATCGATGCTGCAATGGGTAAGTCCTCTGCATACTTTTGCTGAGATAGGAATAGA	TTAGCTGAAGAAGCAGAGGAG 0.32708 1	repeat_sense,igr_sense, NM_125988.1,NM_116502.2,NM_112036.2,NM_180643.1,NM_120575.2,NM_124271.1,NM_122377.3,NM_125584.3,NM_121268.1,NM_102508.2,NM_125218.2,NM_121600.2,NM_103283.1,NM_117961.1,NM_113437.2,NM_119157.1,NM_114402.1,NM_129452.2,NM_102765.3,NM_129798.3,NM_103062.1,NM_123249.2,NM_114412.1,NM_180883.1,NM_105415.2,NM_129690.3,NM_100979.2,NM_130220.1,NM_122668.1,NM_112993.1,NM_105286.3,NM_…
747 147 NC_003070:17372023-17372189:1	ATCGCTAAGTTGTTCGTTTGCATGTCGCTGGATTCAGCGACCAAAAGCAGCGACTAATCGCTGAAACCAGCGACTGATCGCTAAAAATTTCAGCGATCAAAAATTGCGGTCGCTGGTCGCTACTTTTGGTCGTTGAACCAGCGACAGGCAAACGAACAACTTTTGGT	TGTTCGTTTGCATGTCGCTGGAT 0.30923 1	igr_sense, NM_119870.1,NM_121398.2,NM_130291.2,NM_179180.1,NM_115163.2,NM_119869.1,NM_120434.3,NM_119904.2,NM_103788.1,NM_125357.1,NM_202257.1,NM_101940.1,NM_179181.1,NM_128095.2, 59
748 143 NC_003070:17372035-17372178:1	TTCGTTTGCATGTCGCTGGATTCAGCGACCAAAAGCAGCGACTAATCGCTGAAACCAGCGACTGATCGCTAAAAATTTCAGCGATCAAAAATTGCGGTCGCTGGTCGCTACTTTTGGTCGTTGAACCAGCGACAGGCAAACGAA	TGTCGCTGGATTCAGCGACC 0.261389 1	igr_sense, NM_100679.3,NM_121880.2,NM_127570.2,NM_128095.2, 45
749 386 NC_003070:17372045-17372168:1	TGTCGCTGGATTCAGCGACCAAAAGCAGCGACTAATCGCTGAAACCAGCGACTGATCGCTAAAAATTTCAGCGATCAAAAATTGCGGTCGCTGGTCGCTACTTTTGGTCGTTGAACCAGCGACA	TTCAGCGACCAAAAGCAGCGA 0.145677 1	igr_sense, NM_180165.1,NM_125358.1,NM_111052.2,NM_102915.1,NM_128095.2, 20
750 19 NC_003070:17829377-17829511:1	TTTATTGCGTCGATCAATGCATTGAAAGTGACTACATCGGGGTTCCGATTTTTTTTGTTCTTCATATGATGAAGCGGAAACAGTAATCAACCCTGGTTTAGTCACTTTCACTGCATTAATCAATGCATTTGTAAA	TCGATCAATGCATTGAAAGTGAC 0.427027 1	igr_sense, NM_105040.1,NM_105133.1,NM_105019.1,NM_180026.2,NM_103755.2,NM_118814.2,NM_104969.2,NM_100086.3,NM_127536.2,NM_104515.2,NM_129382.1,NM_128886.1,NM_112692.2,NM_104949.1,NM_100537.2,NM_105012.1,NM_104964.1,NM_127263.1,NM_104971.1,NM_180025.1,NM_104993.1,NM_106383.1,NM_104991.2,NM_105002.2,NM_100864.1,NM_124966.1,NM_117690.1,NM_127241.4,NM_125454.2,NM_104985.1,NM_104986.1,NM_105083.1,NM_1…
751 387 ath-MIR161 NC_003070:17829382-17829503:1	TGCGTCGATCAATGCATTGAAAGTGACTACATCGGGGTTCCGATTTTTTTTGTTCTTCATATGATGAAGCGGAAACAGTAATCAACCCTGGTTTAGTCACTTTCACTGCATTAATCAATGCA	TTGAAAGTGACTACATCGGGGTT 1.19919 1	igr_sense, NM_105133.1,NM_105019.1,NM_100734.1,NM_111756.2,NM_118772.1,NM_104969.2,NM_112683.1,NM_104949.1,NM_100537.2,NM_104964.1,NM_117901.1,NM_104971.1,NM_104993.1,NM_112179.1,NM_104991.2,NM_127241.4,NM_118698.1,NM_104986.1,NM_123482.1,NM_121670.2,NM_104944.1,NM_125954.2, 8
752 27 NC_003070:18551824-18551985:1	CAAAATAGTCACTTTTCACTGTTTGATTCGTACACTTGGATTGTACATCACTTTTAGTGTACAAATATATATAAAAATACACAGCGTACATTTTACATTTGTACACTAAAAGTGATGTACAATCCAAGTGTACGAATCAAACAGTGAAAAGTGACTATTTTG	ACTTTTCACTGTTTGATTCGT 0.0333741 1	intron_sense, NM_202317.1,NM_121557.2,NM_127090.1,NM_100465.2,NM_105503.2,NM_104601.2,NM_179791.1,NM_127347.2, 57
753 141 NC_003070:18551854-18551955:1	TACACTTGGATTGTACATCACTTTTAGTGTACAAATATATATAAAAATACACAGCGTACATTTTACATTTGTACACTAAAAGTGATGTACAATCCAAGTGTA	TTGTACATCACTTTTAGTGT 0.760161 1	intron_sense, NM_113788.1,NM_117297.1,NM_103055.2,NM_120159.2,NM_100774.1, 35
754 388 NC_003070:18683139-18683209:1	AGACCACGCTCCTCTGGTTTGAGATCTTTGAGACAATGAAACGGAGATGAAGAAGCGAGGAGAGTCGGTCT	ACGCTCCTCTGGTTTGAGATC 0.399559 0	cds_antisense,exon_antisense, NM_123418.2,NM_118717.2,NM_103558.2,NM_102851.3,NM_113535.2,NM_105787.2,NM_128589.2,NM_124732.1,NM_120195.2,NM_103925.3, 3
755 389 NC_003070:19764004-19764104:1	GGACAAGCACAACATATCCTCTTCTTTGGTTTTGTCTCTGTGGCAACTACATCTTTGCTTGGCTTGTCCAAAGAACACGCACTGTCTTGTGCTTGTAAACC	CAAGCACAACATATCCTCTT 0.142943 0	cds_antisense,exon_antisense, NM_101569.2,NM_102777.2,NM_104033.3,NM_115318.2,NM_180009.1,NM_126034.2,NM_129229.2,NM_105162.2,NM_104181.2,NM_122678.2,NM_112400.1, 6
756 33 ath-MIR169e NC_003070:20045215-20045366:1	GTATCATAGAGTCTTGCATGGAAAAATAGAAAATGAGATTGAGCCAAGGATGACTTGCCGATTTTCTCAACGAATCTTACTGATTATGGTATCCGGCAAGTTGACTTTGGCTCTGTTTCCTTCCCTTCTTTTCGATGTCAAACTCTAGATAC	TGAGCCAAGGATGACTTGCCG 1	igr_sense, HASH(0x1040a128) NM_112983.2,NM_202405.1,NM_202121.1,NM_202122.1,NM_180480.1,NM_104294.2,NM_120734.1,NM_111443.3,NM_105738.3,NM_105941.4,NM_121287.3,NM_105527.2,NM_127347.2,NM_101621.2, 19
757 390 NC_003070:20918776-20918868:1	GAGAGTCACCTTTGAAAGTAGATACACTATCATCTTTGTCCATGAGAACGTCCGGATGAGTATGATAGTGTATCTATTTCAAAAGTGACTCTT	CTTTGAAAGTAGATACACTATCATC 0.0546949 1	igr_sense, NM_113517.3,NM_117491.1,NM_126705.3,NM_202634.1,NM_124085.2,NM_113299.3,NM_105796.2,NM_111696.2,NM_101328.2,NM_116968.1,NM_116319.1,NM_102104.3,NM_124880.2,NM_125899.2,NM_124727.1,NM_126241.1,NM_102745.1,NM_126332.2,NM_121211.3,NM_120231.2,NM_124453.2,NM_116282.1,NM_106519.1, 17
758 391 NC_003070:20985470-20985625:1	AAATGCTGATTTAGTCATGATTGACCAAGACAATGATCTTGAAAAAGGTCATTTTGTTTGTATATGGTTTAAGTTTCTGATTCTTAGTTCTAGAATTTAGATGTTACTTTGGTACACTCATCATTGTCTTAGTCAATCATGACTAAATCAGCATTT	TTAGTCATGATTGACCAAGA 0.120145 1	intron_antisense, NM_103263.1,NM_117526.2, 7
759 392 NC_003070:22088092-22088192:1	TCGAACATGTATAGAGCGAGAAAGGCATCATAACTAAGGTTCCAAAGACTCTAAAAAACGTTAGAGAGTTAAGATGCCTATCTTGTTCTATTTTTGTGCGA	ATAGAGCGAGAAAGGCATCAT 0.882801 1	igr_sense, NM_106695.1,NM_130378.1,NM_112708.3,NM_101554.1,NM_103616.1,NM_180277.1, 3
760 393 ath-MIR426 NC_003070:22111022-22111109:1	ATTTTTGGAAATTTGTCCTTACGGGTAGTACTAGAATACTTGTCCACATGACGATTTGAAATAACCGAAGGACATATGAGGAAAAAAT	TTTTGGAAATTTGTCCTTACG 0	igr_sense, NM_179458.1,NM_202269.1,NM_122371.1,NM_103882.2,NM_125529.2,NM_120982.2, 1
761 394 NC_003070:22153387-22153504:1	GTAGATGTCGAAATCTCTCTGTTGTGAAGTCAAACATGAGTATGAATTAACATTAATGGATCTTTTTGATTCATAATACTCATGTTTGGTTTCACAGTAGATAGATATCGACGTCTAT	AAATCTCTCTGTTGTGAAGTCAAAC 0.00883666 1	igr_sense, NM_104221.2,NM_112235.1,NM_179375.1,NM_113170.1,NM_112879.1,NM_119518.2,NM_120448.2,NM_111296.1,NM_123515.1,NM_114811.2,NM_124868.2,NM_105412.1,NM_112784.2,NM_113169.1,NM_113369.1,NM_112556.1,NM_128012.1,NM_104907.1,NM_114890.2,NM_106251.2,NM_102312.1,NM_125578.2,NM_119483.1,NM_123513.1,NM_202142.1,NM_101053.1,NM_113172.1,NM_202978.1,NM_112636.1,NM_123011.1,NM_111041.3,NM_126242.1,NM_1…
762 395 NC_003070:22272838-22272954:1	TTCTTCTCTCTTTCTCCATGGCTGACTTGTTGTTGTTGTTTTTTCTTCTTCATGGAGCGATGTTTGGCTGTATTGATTGCGTCAATAATTTTTCTTTTAAAAAGAAAGAGAGACGAA	CTCTCTTTCTCCATGGCTGAC 0.328142 0	utr_antisense,exon_antisense, NM_121189.2,NM_115048.2,NM_104141.4,NM_106086.2,NM_104218.3,NM_102571.2,NM_127305.2,NM_148701.1,NM_180470.1,NM_101691.4,NM_202279.1,NM_119883.2,NM_100349.2,NM_121004.2,NM_101313.2,NM_104731.2, 13
763 396 NC_003070:22498316-22498438:1	GGTGCCGCTGCAGTTCCTGGAGGTGGAGGAGGTGGTGGTGGGGCCACTGCAGCTCTTGGAGGTGGAGGCGGTGGAGGTGGAGCCGCTATAGTTGTTGGAAGTGGAGGAGGTGGCGGTGGTGGT	TGCAGTTCCTGGAGGTGGAGGA 0.0394026 0	repeat_sense,cds_antisense,exon_antisense, NM_104789.1,NM_100906.1,NM_148117.1,NM_118941.3,NM_111509.2,NM_100980.2,NM_147979.1,NM_111645.2,NM_121458.2,NM_114992.1, 9
764 397 ath-MIR413 NC_003070:23061699-23061821:1	GATCCATAGTTTCTCTTGTTCTGCACATCCACTAACTTCAGGAACCATGTCCCAGTTTCAGGTTAGATCAAGTGGGAAAACAAATGGAAGATTGTGGCTATGCAGAAACTGGAACTATTCGTC	ATAGTTTCTCTTGTTCTGCAC 0	igr_sense, NM_119935.2,NM_123926.1,NM_122342.2,NM_124607.2,NM_179664.1,NM_127569.2,NM_118164.2,NM_120361.2,NM_100253.2,NM_119817.2,NM_180398.2,NM_100372.2,NM_103096.1,NM_104197.3,NM_179177.1,NM_128240.1,NM_115923.2,NM_202739.1,NM_125830.2,NM_116269.3,NM_119346.2, 7
765 97 NC_003070:23097480-23097562:1	AAACATGTGGGAGGACTCCAAGTGTGGTTATATCCTCGGTATTATCTCGATGTGAACCACACTTGGAGTCCTCCCACATGTTT	GTGGGAGGACTCCAAGTGTG 0.232095 1	exon_sense,cds_sense, NM_124824.3,NM_117067.2, 7
766 398 NC_003070:23097480-23097562:1	AAACATGTGGGAGGACTCCAAGTGTGGTTATATCCTCGGTATTATCTCGATGTGAACCACACTTGGAGTCCTCCCACATGTTT	GAGGACTCCAAGTGTGGTTA 0.278374 1	exon_sense,cds_sense, NM_123499.3, 12
767 399 NC_003070:24547463-24547617:1	GACAATTCTAGCAGAAGTAGCGAGGTTGAGTCTTATTGTAGGTGTTATAATAACAAAACTTAGTGTTATCAGAATCACATCTTGACATCAAAAAGTTTTTTTTTATTACAACTAGTACAGTGAGACTCAACCGCACTACTTCTACAAGAACTGTC	GCAGAAGTAGCGAGGTTGAGT 0.253665 1	igr_sense, NM_102039.2,NM_114430.2,NM_180664.1,NM_125413.2,NM_180607.1,NM_202713.1,NM_129315.2,NM_115395.3,NM_118264.2,NM_115104.1,NM_125688.2,NM_118222.1,NM_111355.3,NM_126256.3,NM_114901.2,NM_125957.1,NM_202406.1,NM_105980.3,NM_120324.2,NM_102982.2,NM_101986.1,NM_128411.2,NM_115775.1,NM_100637.3,NM_103658.2,NM_101716.2,NM_118223.1,NM_128444.1, 14
768 77 ath-MIR157b NC_003070:24924749-24924880:1	TGGGAGGCATTGATAGTGTTGACAGAAGATAGAGAGCACAGATGATAAGATACAATTCCTCGCAGCTTCTTTGCATCTTACTCCTTTGTGCTCTCTAGCCTTCTGTCATCACCCGTTATTTGCCATCACCCA	GTTGACAGAAGATAGAGAGCACA 1.6632 1	igr_sense, HASH(0x104c8f70) NM_179401.1,NM_130162.2,NM_113015.2,NM_123693.2,NM_104194.2,NM_129084.2,NM_202191.1,NM_120949.2,NM_119850.2,NM_123222.1,NM_112390.2,NM_105584.4,NM_116571.1,NM_102498.2,NM_102049.1,NM_115654.1,NM_124734.2,NM_127276.2,NM_201749.1,NM_114584.2,NM_115968.2,NM_180034.1,NM_102947.1,NM_113087.1,NM_180400.1,NM_124435.2,NM_180830.1,NM_180515.1,NM_124445.1,NM_202968.1,NM_179400.1…
769 400 NC_003070:25998072-25998262:1	GCGAGAAACGCGATGGTCATGACGGTTGATGTTTATGACCCATGGAAATCCAGAGCAATCATTGTGGCTTGTGAAATCACAGGGAAGACATACATATGGGCTCCGGTCTCCTTTTAGCCCGCAAGAGGTACAAGAAAAAGAGATGGATTTTGGCATAAGGGTGAGTTGATGGCCATGGATGTTTGGGTCGT	GCGATGGTCATGACGGTTGATGTT 0.492179 1	cds_antisense,exon_antisense, NM_148862.1,NM_117224.1,NM_123121.1,NM_114548.2,NM_124858.2,NM_125056.1,NM_127840.2,NM_103886.2,NM_125385.1,NM_111580.2,NM_114840.3,NM_124781.1,NM_118531.3,NM_148192.1,NM_127523.2,NM_105191.3,NM_123844.1,NM_180566.1,NM_126498.2,NM_113665.1,NM_124782.1,NM_124783.1,NM_147903.2,NM_117210.1,NM_125386.1,NM_114547.1,NM_123669.1,NM_116406.1,NM_124784.1,NM_129884.3,NM_116423…
770 401 NC_003070:26023468-26023548:1	GTGTCTTCTTCGTCGCCATTACTACCGGCGGTTTTTGGCGGTCGAGCTGAAGGAGAAGGAGAAGAAGACGAAGAAGAAAAC	TCTTCTTCGTCGCCATTACT 0.601596 0	cds_antisense,exon_antisense, NM_115062.2,NM_120909.2,NM_179340.1,NM_125896.2,NM_100943.2,NM_120634.2,NM_106053.1,NM_121279.2,NM_128066.3,NM_105540.1,NM_104787.2,NM_130073.1,NM_114859.2,NM_112729.3,NM_120243.2,NM_111951.2,NM_105588.2,NM_119740.2,NM_179823.2,NM_105906.3,NM_116494.3,NM_179169.1,NM_201933.1,NM_119747.2,NM_179303.1,NM_100544.2,NM_113398.2,NM_105201.3, 14
771 402 ath-MIR415 NC_003070:27990677-27990786:1	AGAACAGAGCAGAAACAGAACATATATTCTCTGTCTTTTTTTGTGGCAAAAGTAAATGGCGAGAAGACAACTCTTTTACCATCGAATGTTCTTGGTTTTAGCTCTTCTCT	AACAGAGCAGAAACAGAACAT 1	igr_sense, NM_100392.2,NM_124574.2,NM_130079.2,NM_117107.3,NM_100302.3,NM_123106.1,NM_127957.2,NM_100038.2,NM_113200.2,NM_118662.2,NM_116528.4,NM_118133.2,NM_121076.2,NM_121764.2,NM_123804.2,NM_112754.2,NM_119637.2,NM_202885.1,NM_111612.3,NM_121493.2,NM_119843.2,NM_102899.1,NM_102942.2,NM_100083.1,NM_106232.3,NM_124360.2,NM_100931.2,NM_124363.2,NM_123837.2,NM_104980.2,NM_100236.1,NM_117035.2,NM_1…
772 403 NC_003070:28549476-28549560:1	TAGTGATGTTCTCTTGCAACCCATCGAGAAAGGGTTTAATCTTGCATGATAAGCTTTGTGGATGGGTTGCAGCAGAAGATGACTA	TCTCTTGCAACCCATCGAGA 0.0553863 1	igr_sense, NM_122081.2,NM_125330.1,NM_122669.1, 3
773 151 ath-MIR394b NC_003070:28573702-28573822:1	CTTACAGAGATCTTTGGCATTCTGTCCACCTCCTCTCTCTATATTTATGTGTAATAAGTGTACGTATCTACGGTGTGTTTCGTAAGAGGAGGTGGGCATACTGCCAATAGAGATCTGTTAG	TTGGCATTCTGTCCACCTCC 0	igr_sense, HASH(0x1055ed84) NM_102496.3,NM_118162.1,NM_122065.2,NM_118411.2,NM_125851.3,NM_180470.1,NM_202865.1,NM_100014.3,NM_121004.2, 5
774 404 ath-MIR402 NC_003070:29021476-29021680:1	ATGATTCGAGGCCTATTAAACCTCTGTTACATCTGCTTTTTGAAAAGTTGTCATTTTTCTGAAATCTTCTTGCCTCAATTTCCAACAGCAGATTCATCTTTCATTGGATGATCCGTTAGTTTTTGATAGAAAAAATGAGGTGGGAAGAAATTAAGACTGACTTCGAAATAGCCTTTAAAATAGGGGTTTATAGACCTCGAATCAT	TTCGAGGCCTATTAAACCTCTG 1	intron_sense, NM_119567.2, 2
775 405 NC_003070:29370197-29370348:1	ATCGGACTCGTCTCTGGCTTGGGACTTTTGACACGGCGGAGGAAGCTGCGTTGGCCTATGATAAGGCGGCGTACAAGCTGCGCGGCGATTTCGCCCGGCTTAACTTCCCTAACCTACGTCATAACGGATCTCACATCGGAGGCGATTTCGGT	TCTCTGGCTTGGGACTTTTG 0.082158 0	exon_sense,cds_sense, NM_106316.3,NM_103037.2,NM_106196.3,NM_101827.2, 5
776 406 NC_003070:29382977-29383133:1	TGGAAGTACATTCTTCACAGGGATTGAGTTCAAAGAAGCTATTTTAGAGGTGACATTAAAGCACGGGCATAATGTTGTTCAAGATAGATGGGAAAAGGAGAAGATTTCATTCAAGTGTGGTATGAGCGGGAAATGTAAATGGAGAGTGTATTGTTCA	ACATTCTTCACAGGGATTGA 0.136854 0	repeat_sense,igr_sense, NM_119138.1,NM_111152.2,NM_179450.1,NM_102537.2,NM_123679.2,NM_103678.1,NM_103680.1, 3
777 407 NC_003071:442906-443078:1	CGATCTCCGGTGGGATTTCTCCGGCGATGTTGTTGTACCAAGCTATGAATTGCTCGAGTTTCTGGAGGTTTCCGATCTCCGGTGGGATTGTACCGTTGAGATAATTGAGACTGAGATCAATCGTTCGTAGCTCAGAGCATTGAGATATCGCCGGTGGAATCTCTCCGGTGACG	CCGGTGGGATTTCTCCGGCGAT 0.142936 1	cds_antisense,exon_antisense, NM_100871.3,NM_122492.1,NM_130184.2,NM_127957.2,NM_180611.1,NM_127974.1,NM_115813.1,NM_148402.2,NM_113329.1,NM_103273.1,NM_103838.1,NM_202961.1,NM_126256.3,NM_148435.1,NM_122494.2,NM_114835.2,NM_119888.2,NM_104437.1, 10
778 75 NC_003071:752524-752624:1	GGTATTCCTCGAACCCAAGACCTCACCCTTTAGATTAATTGGTAACAGTTTGTCCTGTGGGAAGGTTGTTAAAGGGTGAGGTCTTGGGTTCGAGGAACGCC	GAACCCAAGACCTCACCCTT 0.330612 1	igr_sense, NM_127316.2,NM_122055.2,NM_104919.2,NM_121173.2,NM_129453.3, 14
779 408 NC_003071:1282072-1282186:1	CTCGTTTCTCCCACACGGCGGCGCTTTAAGAACCGGCGTTTCGTGTAGCTGGAATCTCGAAAAGAGATGTAACCGATTCGCCGTGAAGTGTGACGCCGCCGTGGCGGAGAAAGAG	GTTTCTCCCACACGGCGGCG 0.0597615 1	exon_sense,cds_sense, NM_100185.2,NM_179601.1,NM_118292.1,NM_106706.1,NM_126439.2, 2
780 115 NC_003071:2450900-2450970:1	TCCTGAGTACTCTCTTCCAAGTTTATTCGCACAGTGGACTGTGTGATTTAAGTTTGGGAGAGGGCTCAGGA	GTCCTGAGTACTCTCTTCCA 0.0337187 0	repeat_sense,igr_sense, NM_114965.2,NM_119730.2,NM_102696.1,NM_128559.2,NM_102697.1, 141
781 25 NC_003071:2577815-2577921:1	GTGATGATACTCGACCAGGGGGTCGAGTAACTTGGTAGAGTGAATGGCCGAGTGTGGTCAGGTGGTGTGGCGAAGTGATACTCGACCAGGGGGTCGAGTGGCGTCAT	TGATACTCGACCAGGGGGTCGAGTA 0.135876 0	repeat_sense,igr_sense, NM_126793.1,NM_103358.1,NM_122817.1,NM_180584.1,NM_116794.1,NM_113972.1,NM_201705.1,NM_148798.1,NM_148247.1,NM_103339.1,NM_122890.1,NM_119847.2,NM_103391.1,NM_148526.1,NM_147956.1,NM_126888.1,NM_201713.1,NM_148782.1,NM_180576.1,NM_179436.1,NM_122815.1,NM_116802.1,NM_126833.1,NM_147987.1,NM_103342.1,NM_147971.1,NM_202235.1,NM_126781.1,NM_122822.1,NM_122889.1,NM_113973.1,NM_…
782 409 NC_003071:2597021-2597137:1	TGACTACGCCTGGGTTGTGATGTTCTGCAGGAGGAGGCATGTCTTCATTATTATCATCATCAAAGTGCTGCTCTTCGCCACCATTCTGCAGGACACATGCTCCAGTGTCATGAGTCA	CTGGGTTGTGATGTTCTGCA 0.0162303 1	repeat_sense,igr_sense, NM_106715.3,NM_202410.1,NM_106018.3, 2
783 25 NC_003071:2787690-2787769:1	GTCTTCTACTCGACCAGGGGGTCGAGTGGTCTATTGAGGTTGTGAAGGATCTACTCGACCAAAGGGTCGAGTGGTTTGAT	CTCGACCAGGGGGTCGAGTGGTCT 0.43381 0	repeat_sense,igr_sense, NM_124806.1,NM_126793.1,NM_103358.1,NM_122817.1,NM_180584.1,NM_116794.1,NM_113972.1,NM_201705.1,NM_148798.1,NM_148247.1,NM_103339.1,NM_103391.1,NM_148526.1,NM_147956.1,NM_126888.1,NM_201713.1,NM_148782.1,NM_179436.1,NM_122815.1,NM_116802.1,NM_126833.1,NM_147987.1,NM_103342.1,NM_202235.1,NM_126781.1,NM_113973.1,NM_179432.1,NM_126773.1,NM_147965.1, 998
784 410 NC_003071:2983350-2983455:1	CTCCGATCTCTCCGACGAGACTCCGAGAAACTTGCTGATGAAACTCCAAGGGCAAAAATGGAGGAGGAGAGATGGGTTTCTCGGAGGAGGTCGGAGAAAGAGAGAG	TCTCCGACGAGACTCCGAGAAA 1.29513 0	utr_antisense,exon_antisense, NM_122305.2,NM_124633.3,NM_114566.1,NM_128597.2,NM_104943.2,NM_126690.4, 7
785 25 NC_003071:3092026-3092173:1	CGGTACTCGACCCAGGTGGTCGAGTAGTGGGTCGAGTGACAAGTCGGAGTCTTCTTCTCTTTCTCATGCTCGAATGTCTGGTTGAGTGCGGAATCGAGAAGAATCTAAAGCGATGATGCTTTCTACTCGACCAGGGGGTCGAGTGGTG	TACTCGACCCAGGTGGTCGAGT 0.697467 1	repeat_sense,igr_sense, NM_126793.1,NM_103358.1,NM_180584.1,NM_116794.1,NM_113972.1,NM_201705.1,NM_148798.1,NM_148247.1,NM_103339.1,NM_148526.1,NM_147956.1,NM_126888.1,NM_201713.1,NM_148782.1,NM_179436.1,NM_116802.1,NM_126833.1,NM_147987.1,NM_103342.1,NM_202235.1,NM_126781.1,NM_122828.1,NM_113973.1,NM_179432.1,NM_126773.1,NM_147965.1, 670
786 25 NC_003071:3092150-3092267:1	ACTCGACCAGGGGGTCGAGTGGTGAACCAGAGTGTTGCGGTCGAGGGACTAGCTACGGAGGTCATGACCGAGTACTTCAAGAATGCTAGGATGACGGTACTCGAGCTCGTGGTCGAGT	ACTCGACCAGGGGGTCGAGT 0.201671 0	repeat_sense,igr_sense, NM_126793.1,NM_103358.1,NM_122817.1,NM_180584.1,NM_116794.1,NM_113972.1,NM_201705.1,NM_148798.1,NM_148247.1,NM_103339.1,NM_122890.1,NM_119847.2,NM_103391.1,NM_148526.1,NM_147956.1,NM_126888.1,NM_201713.1,NM_148782.1,NM_180576.1,NM_179436.1,NM_122815.1,NM_116802.1,NM_126833.1,NM_147987.1,NM_103342.1,NM_147971.1,NM_202235.1,NM_126781.1,NM_122822.1,NM_122889.1,NM_113973.1,NM_…
787 411 NC_003071:3212233-3212359:1	AAAATATAGGCCCGCGGTATACCACGGGTTAATATCTAGTTCCCAAATATTATACAATTATACATAGTCTTAACAGAATAACATATCTTACTAGATTTTAACCCGCGGTATACCGCGGGACGATTTT	CCCGCGGTATACCACGGGTTAA 0.775779 1	repeat_sense,igr_sense, NM_129866.3,NM_118504.2,NM_118156.1,NM_104486.3, 407
788 412 NC_003071:3561307-3561429:1	ACAGGTGGAAAGTCAAGGCTGATTGGTGCAGTCTGCGTCCAATGTCGATCTTTATACTTTTTTGAGGCATCCGTTAGTTAACTGGACGCATACTGCACCAATCAGCCTTGACTTTCCAAAAGT	GAAAGTCAAGGCTGATTGGTGC 0.826853 1	repeat_sense,igr_sense, NM_102238.2,NM_114016.1,NM_116818.1,NM_179370.2,NM_103937.2,NM_125485.2,NM_103935.3,NM_105366.3,NM_121094.2, 16
789 413 NC_003071:3561312-3561424:1	TGGAAAGTCAAGGCTGATTGGTGCAGTCTGCGTCCAATGTCGATCTTTATACTTTTTTGAGGCATCCGTTAGTTAACTGGACGCATACTGCACCAATCAGCCTTGACTTTCCA	AGGCTGATTGGTGCAGTCTG 0.270184 1	repeat_sense,igr_sense, NM_114016.1,NM_116818.1,NM_120242.2, 8
790 25 NC_003071:3604405-3604470:1	ACTTGACCCCGTGGTCGAGTAAAAGACCTCAGCACTCCACGTCACCACTCGACCACGTGGTCGAGT	ACTTGACCCCGTGGTCGAGTA 0.0154806 0	repeat_sense,igr_sense, NM_122820.1,NM_103358.1,NM_180584.1,NM_116794.1,NM_113972.1,NM_201705.1,NM_148798.1,NM_103339.1,NM_103391.1,NM_114067.1,NM_126888.1,NM_180576.1,NM_116802.1,NM_126833.1,NM_147987.1,NM_114100.1,NM_147971.1,NM_202235.1,NM_126781.1,NM_113973.1,NM_179432.1,NM_147959.1,NM_111844.3,NM_180578.1,NM_126773.1,NM_147965.1, 512
791 25 NC_003071:3644793-3644895:1	GATGATACTCGACCCACTGGTCGAGTAACGTGGTAGAGTGAACGGCCGAGTGTGGTCAGGTGGTTTGGCGAAGTGATACTCGACCAGGGGGTCGAGTGGCGTC	ATACTCGACCCACTGGTCGAGTA 0.481627 1	repeat_sense,igr_sense, NM_122820.1,NM_103358.1,NM_180584.1,NM_116794.1,NM_113972.1,NM_201705.1,NM_122819.1,NM_103339.1,NM_122890.1,NM_103391.1,NM_148526.1,NM_147956.1,NM_114067.1,NM_126888.1,NM_201713.1,NM_180576.1,NM_116802.1,NM_126833.1,NM_147987.1,NM_114100.1,NM_103342.1,NM_147971.1,NM_130308.2,NM_202235.1,NM_126781.1,NM_122889.1,NM_122828.1,NM_113973.1,NM_179432.1,NM_147959.1,NM_180578.1,NM_…
792 25 NC_003071:3644870-3644983:1	ACTCGACCAGGGGGTCGAGTGGCGTCATCGAGTGGCCTGAGCTGAGGTTACTCGATCTGGGGGTCCAGTAGATGGGAAGAATGGCTCCAAAGTCACTCGACCAGGGGGTCGAGT	ACTCGACCAGGGGGTCGAGTG 0.38542 0	repeat_sense,igr_sense, NM_126793.1,NM_103358.1,NM_122817.1,NM_180584.1,NM_116794.1,NM_113972.1,NM_201705.1,NM_148798.1,NM_148247.1,NM_103339.1,NM_122890.1,NM_103391.1,NM_119847.2,NM_148526.1,NM_147956.1,NM_126888.1,NM_201713.1,NM_148782.1,NM_180576.1,NM_179436.1,NM_122815.1,NM_116802.1,NM_126833.1,NM_147987.1,NM_103342.1,NM_147971.1,NM_202235.1,NM_126781.1,NM_122822.1,NM_122889.1,NM_113973.1,NM_…
793 39 NC_003071:3663881-3663955:1	CAACAGATGGTGTCGAACGACACCAACAGATGGTGTTGAACGACACCAACAGGGTGTCGATCGACACTGTCGTTG	GATGGTGTCGAACGACACCAAC 0.708513 0	repeat_sense,igr_sense, NM_114016.1,NM_126896.1,NM_126950.1,NM_111625.2,NM_147252.1,NM_114110.1,NM_148529.1,NM_129699.1,NM_114074.1,NM_114079.1,NM_124725.2,NM_114102.1,NM_105544.2,NM_148522.1,NM_122848.1,NM_126918.1, 498
794 414 NC_003071:3688277-3688381:1	GTTGTTGTGGAGGATACACCTTATCCTCAGGATTGGCAACGTTGGTGCTGCGGTAGGAGAGGTTGGAGTTGTTGGTTTTGAAGTTGTTGTATCCTTTGTAGCCAC	TGTGGAGGATACACCTTATCCT 0.0938113 0	repeat_sense,igr_sense, NM_103138.2,NM_147976.1,NM_180582.1,NM_180095.1,NM_122068.2, 71
795 25 NC_003071:3758861-3758947:1	GTGATGTCCTCTACTCGACCTGGGGGTCGAGTGGTCTCTTGAGATCTTGAAGCTCCTACTCGACCTCTGGGTCGAGTGGTTTATCAT	CTACTCGACCTGGGGGTCGAGTGGT 0.906314 0	repeat_sense,cds_antisense,exon_antisense, NM_126793.1,NM_122830.1,NM_103358.1,NM_180584.1,NM_116794.1,NM_113972.1,NM_201705.1,NM_148798.1,NM_148247.1,NM_122819.1,NM_103339.1,NM_103391.1,NM_148526.1,NM_147956.1,NM_126888.1,NM_201713.1,NM_148782.1,NM_179436.1,NM_116802.1,NM_126833.1,NM_147987.1,NM_103342.1,NM_202235.1,NM_126781.1,NM_122822.1,NM_113973.1,NM_179432.1,NM_122821.1,NM_120741.2,NM_12677…
796 25 NC_003071:3758871-3758939:1	CTACTCGACCTGGGGGTCGAGTGGTCTCTTGAGATCTTGAAGCTCCTACTCGACCTCTGGGTCGAGTGG	TCGACCTGGGGGTCGAGTGGT 0.0282143 0	repeat_sense,cds_antisense,exon_antisense, NM_126793.1,NM_103358.1,NM_180584.1,NM_116794.1,NM_113972.1,NM_201705.1,NM_148798.1,NM_148247.1,NM_103339.1,NM_103391.1,NM_148526.1,NM_147956.1,NM_126888.1,NM_148782.1,NM_179436.1,NM_116802.1,NM_126833.1,NM_147987.1,NM_103342.1,NM_202235.1,NM_126781.1,NM_113973.1,NM_179432.1,NM_120741.2,NM_126773.1,NM_147965.1, 713
797 25 NC_003071:3881164-3881231:1	ACTCGACCAGGGGGTCGAGTGATGTGATCGAGTGTCTCCCTTGGCTGTACTCGACCAGGGGGTCGAGT	ACTCGACCAGGGGGTCGAGTGA 0.453286 0	repeat_sense,igr_sense, NM_126793.1,NM_103358.1,NM_147281.1,NM_122817.1,NM_180584.1,NM_116794.1,NM_113972.1,NM_201705.1,NM_148798.1,NM_148247.1,NM_103339.1,NM_122890.1,NM_119847.2,NM_103391.1,NM_148526.1,NM_147956.1,NM_126888.1,NM_201713.1,NM_148782.1,NM_180576.1,NM_179436.1,NM_122815.1,NM_116802.1,NM_126833.1,NM_147987.1,NM_103342.1,NM_147971.1,NM_202235.1,NM_126781.1,NM_122822.1,NM_122889.1,NM_…
798 25 NC_003071:3895301-3895393:1	CTGAGGTCTTCTACTCGACCAAGAGGTCGAGTGGTCTGTTGAAGTCGTGAAGCATCTACTCGACCAGGGGGTCGAGTGGTTTGACATGATCAG	TCTACTCGACCAAGAGGTCGAGTGGT 1.15465 0	repeat_sense,igr_sense, NM_118781.1,NM_117491.1,NM_104588.2,NM_126793.1,NM_103358.1,NM_179097.1,NM_180584.1,NM_116794.1,NM_202867.1,NM_201705.1,NM_148798.1,NM_148247.1,NM_118472.2,NM_117204.2,NM_113230.1,NM_122819.1,NM_103339.1,NM_122890.1,NM_103391.1,NM_148526.1,NM_126941.1,NM_147956.1,NM_112545.1,NM_126888.1,NM_201713.1,NM_148782.1,NM_180576.1,NM_123420.1,NM_179436.1,NM_116802.1,NM_118471.2,NM_…
799 95 NC_003071:3980044-3980155:1	GAAGTGAAGTGGTGATGTCTTCTACTCGACCTGGGGTCGAGTGGTCTCTTGAGATCTTGAAGCTCCTACTCGACCTCTAGGTCGAGTGGTTTGTCATGATTAGGTCCGCTTC	TGGTGATGTCTTCTACTCGACCT 0.372564 1	repeat_sense,igr_sense, NM_116792.2,NM_202631.1,NM_116794.1,NM_113972.1,NM_148798.1,NM_101330.1,NM_103391.1,NM_147956.1,NM_126888.1,NM_105044.2,NM_126833.1,NM_147987.1,NM_103342.1,NM_129352.2,NM_202235.1,NM_121568.2,NM_126781.1,NM_118925.2,NM_113973.1,NM_179432.1,NM_113453.2,NM_126773.1,NM_147965.1, 150
800 25 NC_003071:4140823-4140889:1	TACTCGACCATGGGGTCGAGTATATTGTAAGAACGACTTATATGTTACTCGACCTAGGGGTCGAGTA	TACTCGACCATGGGGTCGAGTAT 1.32405 1	repeat_sense,igr_sense, NM_202974.1,NM_126793.1,NM_103358.1,NM_180584.1,NM_116794.1,NM_201705.1,NM_148798.1,NM_148247.1,NM_103339.1,NM_122890.1,NM_103391.1,NM_148526.1,NM_119977.3,NM_147956.1,NM_114067.1,NM_126888.1,NM_201713.1,NM_148782.1,NM_180576.1,NM_179436.1,NM_116802.1,NM_126833.1,NM_147987.1,NM_103342.1,NM_147971.1,NM_112450.1,NM_202235.1,NM_126781.1,NM_122822.1,NM_122889.1,NM_122828.1,NM_…
801 415 NC_003071:4254820-4254988:1	AATTTGAATGTCTATCTCAGTCCCCACAAAATGGAAGTTAAAGTCCAATTTCATTATAGATCAAATCAAACGAACAAGTCTTACGAACTCTTAGAATTCAAACTTTCGATTTAGGGAAAAACTGGACATTAACTTCCATTTTGTGGGGAGTGAAATAGAGATTCGAGTT	TCTATCTCAGTCCCCACAAA 0.428449 1	repeat_sense,igr_sense, NM_101689.1,NM_105288.2,NM_120407.2, 7
802 25 NC_003071:4406736-4406918:1	GAAGGTACTCGACCACGTGGTTGAGTAGTGTGATCGAGTGAAGGTGATGTGGTGGACGTGATGATACTCGACCAGGGGGTCGAGTAATGTGATCGAGTGGTTGTCCAGGTGGTACTCGACCATGGGGTCGAGTGGTGACGTGAAGTGCTGAGGTCTTCTACTCGACCACGGGGTCGAGTGGTC	TACTCGACCACGTGGTTGAGT 0.308683 1	repeat_sense,cds_antisense,exon_antisense, NM_122820.1,NM_126793.1,NM_103358.1,NM_180584.1,NM_116794.1,NM_113972.1,NM_201705.1,NM_148798.1,NM_148247.1,NM_103339.1,NM_122890.1,NM_116985.2,NM_103391.1,NM_128902.2,NM_148526.1,NM_147956.1,NM_114067.1,NM_201713.1,NM_148782.1,NM_180576.1,NM_179436.1,NM_116802.1,NM_126833.1,NM_147987.1,NM_147971.1,NM_202235.1,NM_126781.1,NM_122822.1,NM_122889.1,NM_12048…
803 39 NC_003071:4407812-4407910:1	GAGATGGTGTCGATCGACACCTTCCACTGTCGATCTGACACCCTACGGGACGCTCTTCTCTGAGACGAGCCAGTACGAAGGTGTCGATCGATACCCCTC	AGATGGTGTCGATCGACACCTTC 0.841209 1	repeat_sense,igr_sense, NM_114016.1,NM_126896.1,NM_126950.1,NM_111421.2,NM_116818.1,NM_147252.1,NM_112406.3,NM_114110.1,NM_118703.2,NM_148529.1,NM_114097.1,NM_114074.1,NM_114079.1,NM_148522.1,NM_103410.1,NM_124231.1,NM_122848.1,NM_126918.1, 867
804 95 NC_003071:4522228-4522340:1	GAGGTGAAGTGGTGATGTCCTCTAGTCGACCAGGGGGTCGAGTGGTCTGCTGAGGTTGTGAAGCTTCTACTCGACCAGGGGGTCGAGTGGTTTTGCATGATCAAGTCCGCTTC	TGGTGATGTCCTCTAGTCGACC 0.0454262 0	repeat_sense,igr_sense, NM_116794.1,NM_113972.1,NM_148798.1,NM_103391.1,NM_147956.1,NM_126888.1,NM_119134.1,NM_147987.1,NM_103342.1,NM_202235.1,NM_126781.1,NM_118925.2,NM_113973.1,NM_179432.1,NM_147965.1, 93
805 25 NC_003071:4602125-4602288:1	GAAGTGTTACTCGACCCAGTGGTCGAGTGGTGTCATCGAGTAGCATGGAGTGTGGTTACTCGACCAGGGGGTCGAGTGATTGGTAAGAACGGCCTCAATGTTACTAGACCAAGGGGCCGAGTGTGCTGCTGGAGTTACTCGACCAAGGGGTCGAGTATGTCTTC	ACTCGACCCAGTGGTCGAGT 0.801064 1	repeat_sense,igr_sense, NM_122820.1,NM_126793.1,NM_103358.1,NM_180584.1,NM_116794.1,NM_113972.1,NM_201705.1,NM_148798.1,NM_148247.1,NM_122819.1,NM_103339.1,NM_103391.1,NM_148526.1,NM_147956.1,NM_114067.1,NM_126888.1,NM_201713.1,NM_180576.1,NM_123420.1,NM_179436.1,NM_116802.1,NM_126833.1,NM_147987.1,NM_114100.1,NM_103342.1,NM_147971.1,NM_202235.1,NM_126781.1,NM_122822.1,NM_122828.1,NM_113973.1,NM_…
806 25 NC_003071:5131988-5132137:1	ATGATGGTGATACTCGACCTGTTGGTAGAGTGATTGGTCGAGTGAATGATGATGGTGGGAGTCGGGCATGTTGGTAGAGTGATTGGTCGAGTGAATGATGATGGTGATACTCGATCTGTTGGTAGAGTGATTGGTCGAGTGAATGATGAT	GATACTCGACCTGTTGGTAGAGTGA 0.0949093 1	repeat_sense,igr_sense, NM_120857.1,NM_126793.1,NM_103358.1,NM_124122.2,NM_180584.1,NM_116794.1,NM_113972.1,NM_201705.1,NM_148247.1,NM_103339.1,NM_103391.1,NM_148526.1,NM_104075.2,NM_147956.1,NM_126888.1,NM_201713.1,NM_179436.1,NM_116802.1,NM_126833.1,NM_147987.1,NM_103342.1,NM_202235.1,NM_126781.1,NM_113973.1,NM_179432.1,NM_147965.1, 166
807 416 NC_003071:5530848-5530946:1	CAAATGGTAAAAAGTCGCAATTCCCTTGCAACACACGCAACTACAGTTCTAGTACTTCCCTCGCAACTGTTGCGAGGGATTTGCGATTTTTTTCTTTTG	AAAGTCGCAATTCCCTTGCAACA 1.21394 1	repeat_sense,igr_sense, NM_105932.2,NM_100301.3,NM_122762.1, 16
808 417 NC_003071:5541214-5541364:1	GGCTCGGTGGTCGTTCGAGAGGTCGCTTTGGGCAACCGGTGTATTCTGGCTCGGGACATGCTGGATGACTCTTCATTGAAATTGGTTGACTATCTCCCGAGGCGATACAAGCGGTTCCCAAAGCGTTTTCTCGATCGGCTCGGACTGCGTT	TCGTTCGAGAGGTCGCTTTGGG 0.706091 1	igr_sense, NM_202425.1,NM_127859.1,NM_114425.1,NM_105274.1,NM_202424.1,NM_106287.2,NM_148532.1, 4
809 418 NC_003071:6007143-6007199:1	GAGCCGGTGCGGATGGTTCTATCATAGTCCTCGCTGTAATTGCCATCCGACTGAGCC	GGTGCGGATGGTTCTATCATA 0.130774 0	repeat_sense,igr_sense, NM_122817.1,NM_122815.1,NM_147979.1, 35
810 419 NC_003071:8177156-8177279:1	TTTGATGAAGCTGATTCGATGAACTTGTATTAGGTTTCGATTGCTAGAACTTGCAATTGCGTATACGCTTTGATTCAACAGAGGCAACGAGATGTGGAATTTAGAGAATCTGCTAATGATCAGA	AGCTGATTCGATGAACTTGT 0.144405 0	intron_sense, NM_128926.1,NM_126801.1,NM_111950.2, 2
811 420 NC_003071:10641458-10641597:1	AGGAATATGACAAGGAAGCATAGCTTCAGGTCCTTCAATGGAGGTGTGGTGAAACAGAGTTTCAAGAGGGGGGTATTTTTGTTGAAGGACCACACCTCCATTGAAGGATATGGAGCTATGCTTCCGTGTCAAATATTTCT	GACAAGGAAGCATAGCTTCA 0.412058 1	igr_sense, NM_121888.2,NM_179817.1,NM_112691.1,NM_103957.1,NM_180519.1,NM_128607.3,NM_112860.1, 6
812 421 NC_003071:10641471-10641582:1	GGAAGCATAGCTTCAGGTCCTTCAATGGAGGTGTGGTGAAACAGAGTTTCAAGAGGGGGGTATTTTTGTTGAAGGACCACACCTCCATTGAAGGATATGGAGCTATGCTTCC	GCTTCAGGTCCTTCAATGGAGG 0.565858 1	igr_sense, NM_119385.2,NM_113604.2,NM_103963.1,NM_103959.1,NM_111528.1,NM_117708.1,NM_116621.1,NM_101354.2,NM_105741.3,NM_126182.2,NM_112651.3,NM_202930.1,NM_180596.1,NM_180384.1,NM_119369.2,NM_102687.2,NM_123762.2, 7
813 422 NC_003071:11139051-11139109:1	GCGGCTGTTGCAGCTGCTGCGGCGGCGGCGGCTGCAGCTGCGGCAGCTGCTGCGGCTGC	GCGGCTGTTGCAGCTGCTGC 0.0176628 0	repeat_sense,cds_antisense,exon_antisense, NM_130165.2,NM_125520.1,NM_123208.1,NM_202573.1,NM_111488.1,NM_111442.2,NM_127369.2,NM_116132.1,NM_127130.2,NM_201966.1,NM_128263.3,NM_179836.1,NM_128694.1,NM_126030.2,NM_103511.3,NM_114306.2,NM_124764.2,NM_105235.3,NM_102675.3,NM_120060.1,NM_129849.3,NM_105521.3,NM_117905.2,NM_115857.1,NM_102771.2,NM_119407.2,NM_100727.2,NM_103863.2,NM_202574.1,NM_11484…
814 423 NC_003071:11166782-11166879:1	TCGACTCGTTCAAGCACCAGCTCGAAGAAGCTTAGCTAATTTATCTTAGAAAATAATGAAAAAGCTATGCTTCTCAAGAAGGTGCATGAACAAGTTGA	CAAGCACCAGCTCGAAGAAGCTTAG 0.273228 1	igr_sense, NM_124291.1,NM_123539.3,NM_180841.1,NM_123776.2,NM_112184.2,NM_116649.1,NM_179067.1,NM_124021.2,NM_102893.2,NM_179069.1,NM_105107.2,NM_124542.2,NM_105050.1,NM_118070.3,NM_122175.2,NM_104531.1,NM_122274.2,NM_123246.2,NM_180205.1,NM_121802.1,NM_117187.1,NM_105062.2,NM_179068.1,NM_101622.1,NM_123995.1,NM_123456.1,NM_117515.1,NM_105071.2,NM_124017.1,NM_121840.1,NM_180747.1,NM_123518.1,NM_1…
815 424 ath-MIR407 NC_003071:13873282-13873541:1	TGGGAAAAATGTTAAAAAAATCGCCAACTTTTAAAAATGGGACAAAAAAATCGCCAACTCCTGAAATGTCATTTAAATCATATACTTTTGGTTGACTTTTCCAGAAAGATAATAAAGCAAAGATTCGTAATCAACAAAACTTTGCTCTGTTATCTTTCTAAAGAACTCAATCAAAAGTATGTGATTAAAACGACATTTCAGGAGTTGGTGATTTTTCATCCCATTTTTCAAAGTTGGCAATTTTTTTGACATTTTTTCCA	TTTAAATCATATACTTTTGGT 1	repeat_sense,igr_sense, NM_105517.1,NM_101640.1,NM_116397.2, 23
816 425 NC_003071:14900868-14900952:1	TCTCAGAAGATCATGAAGGAGAGATCTTTCAGAAAGTTTGGGAATATGCAGTTAATCAAGATCTTTTCTTCATAGATTTTGTGGA	ATCATGAAGGAGAGATCTTT 0.0419187 0	exon_sense,cds_sense, NM_179980.1,NM_104280.2,NM_112621.4,NM_128225.3,NM_128783.2,NM_115814.2,NM_105216.3,NM_180168.1, 7
817 11 ath-MIR390a NC_003071:16069032-16069138:1	GTAGAGAAGAATCTGTAAAGCTCAGGAGGGATAGCGCCATGATGATCACATTCGTTATCTATTTTTTGGCGCTATCCATCCTGAGTTTCATTGGCTCTTCTTACTAC	AAGCTCAGGAGGGATAGCGCC 1	igr_sense, NM_120445.1,NM_104491.1, 4
818 131 ath-MIR160a NC_003071:16347360-16347438:1	TGCCTGGCTCCCTGTATGCCATATGCTGAGCCCATCGAGTATCGATGACCTCCGTGGATGGCGTATGAGGAGCCATGCA	TGCCTGGCTCCCTGTATGCCA 0.391038 1	repeat_sense,igr_sense, HASH(0x10a2dbd4) NM_106434.1,NM_119154.3,NM_128394.3, 6
819 141 NC_003071:16603407-16603508:1	TACACTTGGATTGTACATCACTTTTAGTGTACAAATATAAAATGTACGCTGTGTATTTTTATATATATTTGTACACTAAAAGTGATGTACAATCCAAGTGTA	TTGTACATCACTTTTAGTGT 0.666186 1	igr_sense, NM_113788.1,NM_117297.1,NM_103055.2,NM_120159.2,NM_100774.1, 35
820 109 ath-MIR393a NC_003071:16659180-16659310:1	GAGGAAGGATCCAAAGGGATCGCATTGATCCTAATTAAGGTGAATTCTCCCCATATTTTCTTTATAATTGGCAAATAAATCACAAAAATTTGCTTGGTTTTGGATCATGCTATCTCTTTGGATTCATCCTT	TCCAAAGGGATCGCATTGATC 1	igr_sense, HASH(0x10a69a2c) NM_116555.2,NM_113273.3,NM_116163.3,NM_113593.2,NM_128914.2,NM_101152.3,NM_103784.1, 8
821 426 NC_003071:18020930-18021014:1	TGATGAGTAAGTATGGCAGGATTAAGAACTTGCGCTTGGTAAGACACATTGGTAAGATTTTGCAATTGCTCTACTTATGACATCA	TAAGTATGGCAGGATTAAGA 0.0907659 0	exon_sense,cds_sense, NM_103489.2, 1
822 135 ath-MIR164a NC_003071:19527822-19527934:1	GGGTGAGAATCTCCATGTTGGAGAAGCAGGGCACGTGCAAACCAACAAACACGAAATCCGTCTCATTTGCTTATTTGCACGTACTTAACTTCTCCAACATGAGCTCTTCACCC	TGGAGAAGCAGGGCACGTGCA 1	igr_sense, HASH(0x10a603fc) NM_125536.2,NM_100928.3,NM_104479.1,NM_120850.2,NM_124774.1,NM_180458.1,NM_116351.3,NM_179486.1,NM_123323.1,NM_112380.1, 12
823 427 NC_003074:575062-575206:1	TTGTAATTTCTTGTGGAGAGGAAGCAAGAGGATGTGCTTGGTTGTGGAAATATAGGGCCCTTAAAATATATTCATCGTATTCACTCACATAACAAAAATTCCACAAGTAAGCACATCATCTTGCTTCCTCCACAAGAAATTACAA	CTTGTGGAGAGGAAGCAAGA 0.907812 1	igr_sense, NM_202105.1,NM_124676.2,NM_102945.2,NM_116651.2,NM_113507.2,NM_101390.2,NM_121450.1,NM_111665.2,NM_113060.3,NM_106694.2,NM_129078.2, 6
824 141 NC_003074:1924121-1924223:1	TACACTTGGATTGTACATCACTTTTAGTGTGCAAATGTAAAGTGTACGCTGTGTATTTTTTATATACATCTGTACACTAAAAATAGTGTACAAACTAAGTGTA	TTGTACATCACTTTTAGTGT 0.219636 1	igr_sense, NM_113788.1,NM_117297.1,NM_103055.2,NM_120159.2,NM_100774.1, 35
825 428 NC_003074:2597346-2597483:1	GCTGTATATCTCTAGCTCTTTAGTCCTGTAGGTATAAATTTGTATTTAAGGTATGCAGTTTTCGATAAATGTAGTCCCATGTCTCTTGCAGGGTGTTAAAGTAATATACAGGACGAAAGAGCTTGAGGAGAAGCAAGC	CTCTAGCTCTTTAGTCCTGT 0.62022 1	intron_sense, NM_118892.2,NM_102049.1,NM_105406.1,NM_111689.3,NM_118891.3, 4
826 429 NC_003074:2769741-2769794:1	TCCTCCACCACCGAGAGCATTGACGGCGGCGGAGGAGCTCTCGCGGCGGGAGGA	TCCTCCACCACCGAGAGCAT 0.00486123 0	cds_antisense,exon_antisense, NM_124290.1,NM_124356.1,NM_113008.3,NM_130366.2,NM_128458.1,NM_103931.2,NM_111741.1, 4
827 430 NC_003074:3599782-3599914:1	AGCCACTGATTGCAGCTGCAGCATCATCAAGATTCTCATACATACATCAAAAATCTAATCATAAATGGGTTTATTTACACGAATACTTGATGATTTGTGAATCTTGATGATGCTCCAACAGCGAACAGTAGCT	TGCAGCTGCAGCATCATCAA 0.0381297 1	igr_sense, HASH(0x10ab3324) NM_120484.2,NM_121156.1,NM_201823.1,NM_124824.3,NM_119040.1,NM_121102.3,NM_111960.2,NM_120636.2,NM_116989.3,NM_116522.3,NM_104463.1,NM_115836.2,NM_126617.2,NM_105228.2,NM_127142.2,NM_126153.2,NM_119940.2,NM_101692.1,NM_127934.2,NM_180091.1,NM_117005.1,NM_114601.1,NM_102240.2,NM_112800.2,NM_123098.1,NM_116999.2,NM_112117.3,NM_148087.1,NM_127529.2,NM_125772.3,NM_116993.1…
828 431 NC_003074:4111441-4111617:1	CTTTGTAAGTTGGGTTCTTATTCTGCTGCATTTGGCTATTCCGTGTCTGATGACCTTTGTTTTTTCCTTTTGCAGCTTTGTTAGAGTCTCATTTAGATCCATGTCTCTTTGCTTTAATTGGTCACAATGCTTCTTCTGGTTTTATTGCAGCGGAAACGGTTTATTGAACAAACGAAG	TGGGTTCTTATTCTGCTGCA 0.0416236 0	igr_sense, NM_117409.3,NM_179209.1,NM_128054.1,NM_202184.1, 4
829 432 NC_003074:4303969-4304073:1	AGATCCGCCGAGTCTTCTTTTTGTGGAATCTTTTCAAGGAGCTCAGTATTCTATATACACCTCTCTTTGTTTGATCGATTTCACAAACCCTAGCTTCGGCGATCT	TCCGCCGAGTCTTCTTTTTG 0.140833 0	utr_sense,exon_sense, NM_127192.1,NM_101584.2,NM_117614.3, 4
830 433 NC_003074:6063847-6063910:1	AACTAGCTTGAGAGTCAAGTTAATGTTGCTGATACAGAGTCTTTCTTTTACTCTCTAGCTAGTT	TAGCTTGAGAGTCAAGTTAAT 0.156946 0	igr_sense, NM_104222.1,NM_106721.1,NM_121492.1,NM_102568.1,NM_117924.2, 8
831 434 NC_003074:6217496-6217590:1	CAAGTATGGTTTTCTTGGCCCATCCACTTCTAATGTGTTTTGTAACTAATGCAAAATGTGCATTAGAAGTGGATTGGTCAAGGGAAGCGTACTTG	TTTCTTGGCCCATCCACTTCTA 0.926602 1	igr_sense, NM_111055.3,NM_179771.1,NM_147999.1,NM_126462.1,NM_179975.1,NM_128309.2,NM_120934.1,NM_118326.2, 5
832 27 NC_003074:8003442-8003604:1	CAAAATAGTTACTTTTCACTGTTTGATTCGTACACTTAGATTGTACACCACTTTTAGTGTACAAATGTATATAAAAAATACACAGCGTACACTTTACATTTGTACACTAAAAGTGATGTACAATCCAAGTGTACGAATCAAACAGTGAAAAGTGACTACTTTG	ACTTTTCACTGTTTGATTCGT 0.384496 1	igr_sense, NM_202317.1,NM_121557.2,NM_127090.1,NM_100465.2,NM_105503.2,NM_104601.2,NM_179791.1,NM_127347.2, 57
833 13 ath-MIR167a NC_003074:8108080-8108215:1	GGTGCACCGGCATCTGATGAAGCTGCCAGCATGATCTAATTAGCTTTCTTTATCCTTTGTTGTGTTTCATGACGATGGTTAAGAGATCAGTCTCGATTAGATCATGTTCGCAGTTTCACCCGTTGACTGTCGCACC	TGAAGCTGCCAGCATGATCTA 1	igr_sense, HASH(0x10ac1bfc) NM_102771.2,NM_122002.2,NM_123060.2,NM_180523.1, 6
834 435 ath-MIR173 NC_003074:8236160-8236261:1	TAAGTACTTTCGCTTGCAGAGAGAAATCACAGTGGTCAAAAAAGTTGTAGTTTTCTTAAAGTCTCTTTCCTCTGTGATTCTCTGTGTAAGCGAAAGAGCTTG	TTCGCTTGCAGAGAGAAATCAC 1	igr_sense, NM_116923.3,NM_125962.2,NM_179839.1,NM_113766.4, 4
835 436 NC_003074:8984594-8984691:1	TCGAAGTCCTAGAGAGTATCTCTTCCACCAAAAAAAAATGACGATCATCTCTGATCTTTCGTAGGATTTGGTAGAAGAGATTCTATCTGGGACTTCGA	AGTCCTAGAGAGTATCTCTTCCACCA 0.178242 0	igr_sense, NM_126686.1,NM_112235.1,NM_123093.2,NM_112528.1,NM_112879.1,NM_124686.2,NM_180413.1,NM_115823.2,NM_114280.2,NM_112784.2,NM_116747.1,NM_112628.1,NM_112878.1,NM_103959.1,NM_100973.1,NM_113169.1,NM_113227.1,NM_113369.1,NM_101089.1,NM_123062.1,NM_112531.2,NM_112643.1,NM_126524.1,NM_113172.1,NM_112777.2,NM_112636.1,NM_123011.1,NM_101091.1,NM_102513.1,NM_104010.1,NM_113456.2,NM_117143.2,NM_1…
836 437 NC_003074:9832705-9832863:1	TCATCTTCCAGCTTCTGGTCAGAGGCTTGACCATTTGTATATGCGCTTCTCCCATGTCCCGTATAAACCAAAATTCTCAAGGTTCTAGAGATTTTCTATACCGACATGGCGAAAGCGTAAACAAGAACAGTCAAGCATCTGACCAGGAGTTGAAAATGG	AGCTTCTGGTCAGAGGCTTG 0.00416444 1	igr_sense, NM_115879.2,NM_102398.1,NM_120576.1,NM_106377.2,NM_123559.2,NM_105968.2,NM_180436.1, 3
837 438 NC_003074:10166395-10166549:1	GGCGGTGGTGAAGAAGCATGGTTTGGAAATCTCACAGCCTGGATTAGAGCCATATGAAGGGCTCACATGGGAGATGACCAAGAAAAGAGACGACACTGAAGTCCACAAGTTAGAATTATATAGTGAAGTTTCTACATTATTTTCTCACCACCGCT	GGTGGTGAAGAAGCATGGTT 0.385902 0	exon_sense,cds_sense, NM_105032.1,NM_129738.3,NM_119682.3,NM_115601.2,NM_119801.2,NM_100976.2,NM_122712.2, 3
838 439 NC_003074:10196308-10196380:1	GGGAGAGAAGATGAAGCTGTTCTGCATCTCTTCAAACTTTGAGAAGTATGATGTCAGCCCCATCTTCTGGCCC	GAGAAGATGAAGCTGTTCTG 0.311367 0	cds_antisense,exon_antisense, NM_202904.1,NM_123854.2,NM_113669.1,NM_180896.1,NM_103198.2,NM_113513.2,NM_112986.2,NM_118992.1,NM_119020.2,NM_123447.2,NM_114071.2,NM_121581.2,NM_112904.2,NM_125381.2, 7
839 440 NC_003074:10527755-10527897:1	AGAGAGCTTGGAACCAATTGTGTTCTGTTTTTTAAGTGTTTTTGTGCTAATAATTGGAGGATTGGTCTTCCTAAGGTTTAGGAGCCTATCTCCCACTTTTCCCAATTCCCTAGTTTGTAGAAATCGTTGATTCCAAGCTAGCT	GAGCTTGGAACCAATTGTGTTC 0.331105 0	utr_sense,exon_sense, NM_202340.1,NM_110974.3,NM_180157.1,NM_127319.2,NM_101096.2,NM_104110.2,NM_116290.2,NM_119888.2,NM_122778.1, 6
840 441 NC_003074:11416901-11417012:1	GTCGGATTCGGTTCAGGTTCGGGTTCGAGTTTGGGTTTATTTATATATAGAACGGGTCTTAAATTTCTAAACCCGAAAAACTCGAACCCAAAATACCTGACCCAAACCCGAC	GTTCAGGTTCGGGTTCGAGT 0.204933 0	repeat_sense,igr_sense, NM_123544.2,NM_122458.2,NM_121840.1,NM_113451.2,NM_119442.2,NM_124630.3,NM_106389.3,NM_201967.1,NM_180744.1,NM_180117.1, 57
841 25 NC_003074:11555941-11556015:1	AGACACTCGACCTCGTGGTCGAGTGGTGAGGTGAAGTGGTGATGTCCTCTACTCGACCAGGGGGTCGAGTGGTCT	CACTCGACCTCGTGGTCGAGTGGT 0.442105 1	repeat_sense,igr_sense, NM_122820.1,NM_126793.1,NM_103358.1,NM_113671.2,NM_180584.1,NM_116794.1,NM_113972.1,NM_201705.1,NM_148798.1,NM_148247.1,NM_122819.1,NM_103339.1,NM_122890.1,NM_103391.1,NM_148526.1,NM_147956.1,NM_114067.1,NM_126888.1,NM_201713.1,NM_148782.1,NM_180576.1,NM_179436.1,NM_116802.1,NM_126833.1,NM_147987.1,NM_114100.1,NM_103342.1,NM_147971.1,NM_202235.1,NM_126781.1,NM_122822.1,NM_…
842 25 NC_003074:12051859-12051950:1	GGTGGTGTCTTCTACTCGGCCTAGGGGTCGAGTGGTCTCTTGAGATCTTGAAGCTCCTACTCGACCTCTAGGTCGAGTGGTTTGTCATGATC	TCTACTCGGCCTAGGGGTCGAGTG 0.493084 0	repeat_sense,igr_sense, NM_126793.1,NM_103358.1,NM_180584.1,NM_116794.1,NM_113972.1,NM_148798.1,NM_148247.1,NM_122819.1,NM_103339.1,NM_103391.1,NM_148526.1,NM_147956.1,NM_126888.1,NM_148782.1,NM_179436.1,NM_116802.1,NM_126833.1,NM_147987.1,NM_103342.1,NM_202235.1,NM_126781.1,NM_122822.1,NM_113973.1,NM_179432.1,NM_122821.1,NM_126773.1,NM_147965.1, 391
843 25 NC_003074:12215748-12215875:1	ATGATGGCACTCGACCTCGGGGTCGAGTGGTGGTTGAATTGGTGATGTCCTCTACTCGACCTGTTGGTCGAGTGGTCTCTTGAGATCTTGAAGCTCCTACTCGACCTCTGGGTCGAGTGGTTTGTCAT	GGCACTCGACCTCGGGGTCGAGTGGTGG 1.05209 1	repeat_sense,igr_sense, NM_122820.1,NM_118048.1,NM_122997.1,NM_126793.1,NM_103358.1,NM_113671.2,NM_180584.1,NM_116794.1,NM_113972.1,NM_201705.1,NM_148798.1,NM_148247.1,NM_122819.1,NM_103339.1,NM_122890.1,NM_103391.1,NM_148526.1,NM_147956.1,NM_114067.1,NM_126888.1,NM_148782.1,NM_180576.1,NM_201718.1,NM_179436.1,NM_116802.1,NM_126833.1,NM_147987.1,NM_103342.1,NM_147971.1,NM_103206.1,NM_202235.1,NM_…
844 25 NC_003074:12215748-12215875:1	ATGATGGCACTCGACCTCGGGGTCGAGTGGTGGTTGAATTGGTGATGTCCTCTACTCGACCTGTTGGTCGAGTGGTCTCTTGAGATCTTGAAGCTCCTACTCGACCTCTGGGTCGAGTGGTTTGTCAT	CTCGACCTCGGGGTCGAGTGGTG 0.796783 1	repeat_sense,igr_sense, NM_126793.1,NM_103358.1,NM_180584.1,NM_116794.1,NM_113972.1,NM_201705.1,NM_148798.1,NM_148247.1,NM_122819.1,NM_103339.1,NM_103391.1,NM_148526.1,NM_147956.1,NM_114067.1,NM_126888.1,NM_148782.1,NM_180576.1,NM_201718.1,NM_179436.1,NM_116802.1,NM_126833.1,NM_147987.1,NM_103342.1,NM_147971.1,NM_202235.1,NM_126781.1,NM_122822.1,NM_113973.1,NM_179432.1,NM_147959.1,NM_122821.1,NM_…
845 25 NC_003074:12227978-12228114:1	TGAGATGATGGCACTCGACCTCGGGGTCGAGTGGTGGTTGAATTGGTGATGTCCTCTACTCGACCTGTTGGTCGAGTGGTCTCTTGAGATCTTGAAGCTCCTACTCGACCTCTGGGTCGAGTGGTTTGTCATGATCA	GGCACTCGACCTCGGGGTCGAGTGGTGG 1.13524 1	repeat_sense,igr_sense, NM_122820.1,NM_118048.1,NM_122997.1,NM_126793.1,NM_103358.1,NM_113671.2,NM_180584.1,NM_116794.1,NM_113972.1,NM_201705.1,NM_148798.1,NM_148247.1,NM_122819.1,NM_103339.1,NM_122890.1,NM_103391.1,NM_148526.1,NM_147956.1,NM_114067.1,NM_126888.1,NM_148782.1,NM_180576.1,NM_201718.1,NM_179436.1,NM_116802.1,NM_126833.1,NM_147987.1,NM_103342.1,NM_147971.1,NM_103206.1,NM_202235.1,NM_…
846 25 NC_003074:12227982-12228109:1	ATGATGGCACTCGACCTCGGGGTCGAGTGGTGGTTGAATTGGTGATGTCCTCTACTCGACCTGTTGGTCGAGTGGTCTCTTGAGATCTTGAAGCTCCTACTCGACCTCTGGGTCGAGTGGTTTGTCAT	CTCGACCTCGGGGTCGAGTGGTG 0.811374 1	repeat_sense,igr_sense, NM_126793.1,NM_103358.1,NM_180584.1,NM_116794.1,NM_113972.1,NM_201705.1,NM_148798.1,NM_148247.1,NM_122819.1,NM_103339.1,NM_103391.1,NM_148526.1,NM_147956.1,NM_114067.1,NM_126888.1,NM_148782.1,NM_180576.1,NM_201718.1,NM_179436.1,NM_116802.1,NM_126833.1,NM_147987.1,NM_103342.1,NM_147971.1,NM_202235.1,NM_126781.1,NM_122822.1,NM_113973.1,NM_179432.1,NM_147959.1,NM_122821.1,NM_…
847 17 NC_003074:12467993-12468138:1	GTCCCTAGTAAATCCCCCGCAAATTGCGAGGGACTTGCGTGGGGCCGTAGTAAATCCCACGCCAAGCTGTAAGGTTACACGCTTGCGAGGAAGTTGCGTGTATCCGTCGTAAATCCCTCGCAAATTGCTAGGGGTTTGCGAGGGAC	AATCCCCCGCAAATTGCGAGG 0.569511 1	repeat_sense,igr_sense, NM_115236.3,NM_128872.2,NM_128826.3, 24
848 442 NC_003074:12787917-12788014:1	TAGGGAATATCTTGATCTTTCCACCATCTACAAAGAATAAAAAAAAAGCTTCCAATATTACTAGGTATTTGGTGGTGGAAAGATCAAGATATTCCTTA	ATATCTTGATCTTTCCACCA 1.11026 0	igr_sense, NM_113045.1,NM_116416.3,NM_114505.1,NM_179205.2,NM_180289.1,NM_127974.1,NM_112790.1,NM_130146.3,NM_127887.2,NM_115642.2,NM_119266.1,NM_201965.1,NM_114026.1, 8
849 443 NC_003074:12787918-12788013:1	AGGGAATATCTTGATCTTTCCACCATCTACAAAGAATAAAAAAAAAGCTTCCAATATTACTAGGTATTTGGTGGTGGAAAGATCAAGATATTCCTT	TTGATCTTTCCACCATCTAC 0.106859 0	igr_sense, NM_125635.2,NM_123923.2,NM_118532.2,NM_123554.1,NM_118531.3,NM_114614.2,NM_104462.2,NM_130221.2,NM_122648.1,NM_114026.1,NM_118533.2, 6
850 3 NC_003074:13216182-13216368:1	GCAAATGCCTCGCAATATTTGCGACGGACGTACGACACTATAATTAGCAATGACATTGCAAGTAATATGTCCGTCGCAACAAAAGCAATGTCGCAAATGCCTCGCAATATTTGCGACGGATGTACGACACAATAATTAGCAATGCTATTGCAAGTAATATGTTCGTCGCAAAATACGAGGCGTTTGC	ATGCCTCGCAATATTTGCGACGGA 0.0720662 0	repeat_sense,igr_sense, NM_104162.1,NM_147313.1,NM_122762.1, 83
851 95 NC_003074:13408350-13408462:1	GAGGTGAAGTGGTGATGTCTTCTACTCGACCTGGGGGTCGAGTGATCTCTTGAGATCTCGAAGCTCCTACTCGACCTCTGGGTCGAGTGGTTTGTCATGATCAGGTCCGCTTC	TGGTGATGTCTTCTACTCGACCT 0.438204 1	repeat_sense,igr_sense, NM_116792.2,NM_202631.1,NM_116794.1,NM_113972.1,NM_148798.1,NM_101330.1,NM_103391.1,NM_147956.1,NM_126888.1,NM_105044.2,NM_126833.1,NM_147987.1,NM_103342.1,NM_129352.2,NM_202235.1,NM_121568.2,NM_126781.1,NM_118925.2,NM_113973.1,NM_179432.1,NM_113453.2,NM_126773.1,NM_147965.1, 150
852 25 NC_003074:13624248-13624327:1	GTCCCCTACTCAGCCAGGGGGTCGAGTGGTCTGTTGAGGTCTTGAAGCTTCTACTCGACCTCGGGGTCTAGTGGTTTGAC	CTACTCAGCCAGGGGGTCGAGTGGT 0.145313 0	exon_sense,repeat_sense,cds_sense, NM_111911.3,NM_126793.1,NM_103358.1,NM_180584.1,NM_116794.1,NM_201705.1,NM_148798.1,NM_148247.1,NM_103339.1,NM_103391.1,NM_148526.1,NM_147956.1,NM_148782.1,NM_179436.1,NM_116802.1,NM_126833.1,NM_147987.1,NM_103342.1,NM_126781.1,NM_112419.2, 327
853 25 NC_003074:13625937-13626043:1	GTGATGATACTCGACCAGGGGGTCGAGTAACTTGGTAGAGTGAATGGCTGAGTGTGGTCAGGTTGTGTGGCGAAGTGATATTCGACCAGGGGGTCGAGTGGCGTCAT	TACTCGACCAGGGGGTCGAGTA 0.295658 0	repeat_sense,igr_sense, NM_126793.1,NM_103358.1,NM_122817.1,NM_180584.1,NM_116794.1,NM_113972.1,NM_201705.1,NM_148798.1,NM_148247.1,NM_103339.1,NM_122890.1,NM_119847.2,NM_103391.1,NM_148526.1,NM_147956.1,NM_126888.1,NM_201713.1,NM_148782.1,NM_180576.1,NM_179436.1,NM_122815.1,NM_116802.1,NM_126833.1,NM_147987.1,NM_103342.1,NM_147971.1,NM_202235.1,NM_126781.1,NM_122822.1,NM_122889.1,NM_113973.1,NM_…
854 444 NC_003074:13629452-13629658:1	GATCGGATTCTGAGGCATCTCATTCCTTCTGCTGATGTTCCCTTTCCTTTGACATGAGTCACATTTCGAGATAAATTCCTGAGCATCCTTAAACATTGTCGTCCACCAAAAACCAGCTTGCAAGATTTTTGACACTGTCTTGAACGTTGCAAAGTGGCAACCATAGGCGGACCCATGGTAGTGCAGTAGGATGCCTTCGATTTCGTC	TGAGGCATCTCATTCCTTCT 0.147497 0	repeat_sense,igr_sense, NM_127097.1,NM_105805.2,NM_106540.2,NM_124121.2,NM_180707.1,NM_120422.2,NM_147974.1,NM_121430.3,NM_127095.1,NM_101276.2,NM_147982.1,NM_111183.1,NM_123887.2,NM_201739.1,NM_127099.2,NM_101993.2, 70
855 25 NC_003074:13656862-13657062:1	GAAGACATACTCGACCCCCAGGTCGAGTGACTTTGGAGTCATTCTTCCCACCTACTCGACCACTTGGTCGAGTATCCTCAGCTCAGGCTACTCAATGACACTACTCGATCCCCTGGTCGAGTATCACTTCGCCACACCACCTGACAACACTCGACCGTTCACTCTACCACATCACTCGACCCCATGGTCGAGTATCACTTC	ATACTCGACCCCCAGGTCGAGTGAC 0.938798 0	repeat_sense,igr_sense, NM_122820.1,NM_116794.1,NM_113972.1,NM_148798.1,NM_122819.1,NM_122890.1,NM_103391.1,NM_147956.1,NM_114067.1,NM_126888.1,NM_148782.1,NM_180576.1,NM_126833.1,NM_147987.1,NM_114100.1,NM_103342.1,NM_147971.1,NM_130308.2,NM_202235.1,NM_126781.1,NM_122822.1,NM_122889.1,NM_122828.1,NM_113973.1,NM_179432.1,NM_147959.1,NM_122821.1,NM_180578.1,NM_126773.1,NM_147965.1, 1073
856 25 NC_003074:14110945-14111051:1	GTGATGATACTCGACCAGGGGGTCGAGTAATTTGGTAGAGTGAATGGCCGAGTGTGGTCAGGTGGTGTGGCGAAGTGATACTCGACCAGGGGGTCGAGTGGCATCAT	TACTCGACCAGGGGGTCGAGTA 0.219489 0	repeat_sense,igr_sense, NM_126793.1,NM_103358.1,NM_122817.1,NM_180584.1,NM_116794.1,NM_113972.1,NM_201705.1,NM_148798.1,NM_148247.1,NM_103339.1,NM_122890.1,NM_119847.2,NM_103391.1,NM_148526.1,NM_147956.1,NM_126888.1,NM_201713.1,NM_148782.1,NM_180576.1,NM_179436.1,NM_122815.1,NM_116802.1,NM_126833.1,NM_147987.1,NM_103342.1,NM_147971.1,NM_202235.1,NM_126781.1,NM_122822.1,NM_122889.1,NM_113973.1,NM_…
857 25 NC_003074:14426040-14426114:1	AGATCACTCGACCCCCTGGTCGAGTAGAGGACATCACTACTTGATCACATCACTCGACCCCGAGGTCGAGTGTCT	TCACTCGACCCCCTGGTCGAGTAGA 0.593599 1	exon_sense,repeat_sense,cds_sense, NM_122820.1,NM_103358.1,NM_180584.1,NM_116794.1,NM_113972.1,NM_201705.1,NM_148798.1,NM_122819.1,NM_103339.1,NM_122890.1,NM_103391.1,NM_114067.1,NM_126888.1,NM_148782.1,NM_180576.1,NM_116802.1,NM_126833.1,NM_147987.1,NM_114100.1,NM_103342.1,NM_147971.1,NM_148010.1,NM_202235.1,NM_126781.1,NM_122822.1,NM_122889.1,NM_103402.1,NM_113973.1,NM_179432.1,NM_147959.1,NM_1…
858 25 NC_003074:14432600-14432668:1	CTACTCGACCTGGGGGTCGAGTGGTCTTTGAAGGTCTTGAAGCTTCTACTCGACCTTGGGGTCGAGTGG	CTCGACCTGGGGGTCGAGTGGT 0.149912 1	repeat_sense,igr_sense, NM_126793.1,NM_103358.1,NM_180584.1,NM_116794.1,NM_113972.1,NM_201705.1,NM_148798.1,NM_148247.1,NM_103339.1,NM_103391.1,NM_148526.1,NM_147956.1,NM_126888.1,NM_201713.1,NM_148782.1,NM_179436.1,NM_116802.1,NM_126833.1,NM_147987.1,NM_103342.1,NM_202235.1,NM_126781.1,NM_122822.1,NM_113973.1,NM_179432.1,NM_122821.1,NM_120741.2,NM_126773.1,NM_147965.1, 971
859 95 NC_003074:14495545-14495666:1	TGGTGAAGTGAAGTGGTGAAGTCTTCTACTCGACCAGGGGATCGAGTGGTCTGTTAAGGTCGTGAAGCGTCTACTTGACCAGGGGGTCGAGTGGTTTGACATGATCAGGTCCGCTTCTTCCA	AAGTGGTGAAGTCTTCTACTCGACC 0.0578641 1	exon_sense,repeat_sense,cds_sense, NM_116794.1,NM_113972.1,NM_148798.1,NM_111476.1,NM_103391.1,NM_147956.1,NM_126888.1,NM_126833.1,NM_147987.1,NM_103342.1,NM_202235.1,NM_126781.1,NM_113973.1,NM_179432.1,NM_122117.2,NM_126489.1,NM_126773.1,NM_147965.1, 137
860 115 NC_003074:14560277-14560347:1	TCCTGAGTACTCTCTTCCAAGTTTGGTCACACAGTGGACTGTGTGATTTAAGTTTGGGAGAGGGCTCAGGA	GTCCTGAGTACTCTCTTCCA 0.140049 0	repeat_sense,igr_sense, NM_114965.2,NM_119730.2,NM_102696.1,NM_128559.2,NM_102697.1, 141
861 25 NC_003074:14594702-14594771:1	TACTCGACCAGGAGGTCGAGTGATGTGATCAAATGATTGTCTTGGCGGTACTCGACCAGGGGGTCGAGTG	ATACTCGACCAGGAGGTCGAGTG 0.34487 0	repeat_sense,igr_sense, NM_126793.1,NM_122830.1,NM_103358.1,NM_122817.1,NM_180584.1,NM_116794.1,NM_113972.1,NM_201705.1,NM_148798.1,NM_148247.1,NM_122819.1,NM_103339.1,NM_122890.1,NM_103391.1,NM_126651.1,NM_148526.1,NM_147956.1,NM_126888.1,NM_201713.1,NM_148782.1,NM_180576.1,NM_179436.1,NM_122815.1,NM_116802.1,NM_126833.1,NM_147987.1,NM_103342.1,NM_147971.1,NM_117342.2,NM_202235.1,NM_126781.1,NM_…
862 445 NC_003074:15273445-15273638:1	AGACCACTACTCGACCTCATCATTCTACCTAGAGGTCGAGTATCGCCATCACACCACTCGACTGCATACTCGATCACAAGCTTCAGAGCCTTCTTCATTCCGCACTTAACCAGACACTCGAGCACAAGGAAGAAAAGAAGACTCCAGTTATTCACTCGACCTCTCACTCGACCAGATGGGTCGAGTACAGTTCT	ACTCGACCTCATCATTCTACCTAGA 0.910445 0	repeat_sense,igr_sense, NM_122830.1,NM_122819.1,NM_126651.1,NM_127245.2,NM_147979.1,NM_122822.1,NM_116567.3,NM_122821.1,NM_116043.1, 98
863 446 NC_003074:15409526-15409660:1	GGTTACAGCGGTCCAAGCAGACAAAACTGTCTACAGAGTGAACCGCTTTTTATTCACCATTCACAAACAAAATGGATGGTAAATAAAACGCAGTTCAGTCGGTAGACGGTTTTGTCCGCTTGGACCGCTGTAGCC	GTCCAAGCAGACAAAACTGT 0.00749976 1	igr_sense, NM_111451.1,NM_129057.2,NM_126404.1, 6
864 25 NC_003074:15723837-15723917:1	CACTCGACCTCGAGGTCGAGTGAAGTGATCGAGTGACCGTCTGGTGATGGAGATGATGGCACTCGACCACGGGGTCGAGTG	TCGACCTCGAGGTCGAGTGA 0.192615 0	repeat_sense,igr_sense, NM_116794.1,NM_113972.1,NM_201705.1,NM_148798.1,NM_122819.1,NM_122890.1,NM_103391.1,NM_148526.1,NM_147956.1,NM_126888.1,NM_148782.1,NM_180576.1,NM_126833.1,NM_147987.1,NM_103342.1,NM_147971.1,NM_202235.1,NM_126781.1,NM_122822.1,NM_122889.1,NM_122828.1,NM_113973.1,NM_179432.1,NM_147959.1,NM_122821.1,NM_180578.1,NM_126773.1,NM_147965.1, 484
865 25 NC_003074:15733301-15733381:1	CACTCGACCTCGAGGTCGAGTGAAGTGATCGAGTGACCGTCTGGTGATGGAGATGATGGCACTCGACCACGGGGTCGAGTG	TCGACCTCGAGGTCGAGTGA 0.192615 0	repeat_sense,igr_sense, NM_116794.1,NM_113972.1,NM_201705.1,NM_148798.1,NM_122819.1,NM_122890.1,NM_103391.1,NM_148526.1,NM_147956.1,NM_126888.1,NM_148782.1,NM_180576.1,NM_126833.1,NM_147987.1,NM_103342.1,NM_147971.1,NM_202235.1,NM_126781.1,NM_122822.1,NM_122889.1,NM_122828.1,NM_113973.1,NM_179432.1,NM_147959.1,NM_122821.1,NM_180578.1,NM_126773.1,NM_147965.1, 484
866 5 NC_003074:15960581-15960714:1	AGTAGATTTGAGGAAAGTCTTTTTCTCCTTCACGGCTAGCATCAACAAAATCGCATTGGTGGAAGTTTTGTCCAAAAGCAAGTCTACAAATGATGCTAGCCGTGAAGGAGAAAAGGACTTTCCTCAAATCTACT	GAGGAAAGTCTTTTTCTCCTTCA 0.483541 1	intron_antisense, NM_113608.2,NM_102197.3,NM_115550.3,NM_112444.1,NM_115462.2,NM_180308.1,NM_124556.1,NM_120415.1,NM_119849.2,NM_124237.1,NM_117823.2,NM_117955.2,NM_202883.1,NM_106346.2,NM_117064.2,NM_121505.2,NM_118441.1,NM_180621.2,NM_112716.2,NM_112857.2,NM_202836.1,NM_106284.2,NM_147883.1,NM_121679.2,NM_118771.1,NM_116500.2,NM_100188.1,NM_103921.2,NM_102250.3,NM_100553.2,NM_123398.1,NM_122558…
867 5 NC_003074:15960584-15960711:1	AGATTTGAGGAAAGTCTTTTTCTCCTTCACGGCTAGCATCAACAAAATCGCATTGGTGGAAGTTTTGTCCAAAAGCAAGTCTACAAATGATGCTAGCCGTGAAGGAGAAAAGGACTTTCCTCAAATCT	AAAGTCTTTTTCTCCTTCAC 0.490196 1	intron_antisense, NM_105777.2,NM_130094.2,NM_122216.2,NM_180308.1,NM_179543.1,NM_117823.2,NM_115118.2,NM_118135.1,NM_119281.1,NM_126058.1,NM_118441.1,NM_121304.2,NM_202836.1,NM_106284.2,NM_148004.1,NM_118771.1,NM_104721.1,NM_119255.1,NM_116500.2,NM_100279.3,NM_147880.2,NM_100188.1,NM_105747.1,NM_100553.2,NM_101265.2,NM_122558.2,NM_105927.3,NM_105640.2,NM_111645.2,NM_123069.1,NM_122716.1,NM_104121…
868 447 NC_003074:16562966-16563057:1	TTGTTTCGTGAGTTTAGGGTTCTTGAATCAAAGAATCGATAAAGTAATCGCCAATGAATCTTCGATTCGAGAACCCTAAGCTCACGAAACGA	GTGAGTTTAGGGTTCTTGAA 0.875711 1	igr_sense, NM_105648.3,NM_124580.2,NM_130292.2,NM_105104.2,NM_119610.2,NM_102763.2, 9
869 448 NC_003074:16980988-16981146:1	GAGTTCTCTGTGGGAGAAGTTCCTTGTTACATCAGAAGGTATATCCTCTGAGGAATTTAGTTATCATTGCCTCTAGTTTTGTGTTGGGGAACTGGAGAGCTTCCAGGTGGTTTGATCAGGTTTCTTATCGTTATAGTTTTGTTCTCTCACAGATGACTC	CTCTGTGGGAGAAGTTCCTT 0.321195 0	exon_sense,cds_sense, NM_120718.2,NM_120015.2, 3
870 449 NC_003074:17350999-17351098:1	CGAGAACGACGGCGTTTAGATGAAGTTAGGGTTTGCGAAAATGACGGACATTGAGGAATCGCTGTGTGTCGTCCTGACCAATGAAACGACGTCGTTGTTG	ACGACGGCGTTTAGATGAAG 0.317779 1	cds_antisense,exon_antisense, NM_120392.3,NM_113177.2,NM_180273.1,NM_114575.3,NM_180274.1,NM_104436.1, 6
871 450 NC_003074:17753121-17753249:1	ATCTATTTTCTTTTAGGTCGAGCTTCATTGGAACCAAATGGTGGCTCATCCATCTATTACTAAAGCTATACAGCAGGTGGACAAGCCATCATCATGTTCCTGTGAAGCTCGATCTAAAAGACTACAGAT	CTTTTAGGTCGAGCTTCATTG 0.64392 1	igr_sense, NM_111995.2,NM_128361.1,NM_128383.2,NM_180582.1,NM_101053.1,NM_110981.1,NM_112236.1, 5
872 451 NC_003074:18611761-18611863:1	GTCATTCCGCAACTTTTGGCGTTGACGGGCTCGCCTGATAATTCCATAATAAGTACGGACTATCCGCGAAAACCGTCTATTCTTCTTGTTGCTGGAAACTGAC	TTCCGCAACTTTTGGCGTTG 0.274876 0	cds_antisense,exon_antisense, NM_114876.1,NM_105264.2,NM_118929.3,NM_180000.1,NM_122658.2,NM_121376.2, 4
873 452 NC_003074:19331840-19331998:1	TGGTTTTTGGGGCATACTTGTTGTGATGCTTGTGGAAGGTTGTTTGTTAAGGGGAATTATTGTCCTGTATGTTTGAAGGTATATTTACATATTCTCCTCCTCGGTGATAGGAAAACGTGCGCTCTGTTTCCAAGCATCATATTTAGATATTCTTGGCCA	GGCATACTTGTTGTGATGCTTGTG 0.0029227 1	exon_sense,cds_sense, NM_111802.1,NM_102754.1,NM_114796.2,NM_106258.3,NM_111071.1,NM_179695.1,NM_106441.2,NM_115162.2,NM_116039.3,NM_148497.1,NM_123319.2,NM_127360.2,NM_102084.1,NM_125354.1,NM_116115.1,NM_111251.1, 22
874 109 ath-MIR393b NC_003074:20702624-20702787:1	CTAGAGAAAGGATCCAAAGGGATCGCATTGATCCTAATTAAGCTGATTTATTCCCCAATAATTGTTTTTTTTTTCCTTCTCAATCGAAAGATGGAAGAAAAACAAATTCCAAACATTTTGCTTACTTTTCCGGATCATGCGATCTCTTTGGATTCATTCTTTGG	GATCCAAAGGGATCGCATTGATC 0.311396 1	igr_sense, HASH(0x11037dfc) NM_116555.2,NM_127982.1,NM_113273.3,NM_116163.3,NM_113593.2,NM_128914.2,NM_101152.3,NM_103784.1, 8
875 47 NC_003074:22118878-22118999:1	TCATAGTCATTATCACAGTACTATGATTATGAATTGCATGCATAAAGTATGTTTGGTAAGATAAAATTTAAAATAGTGTATGGTCTAATTCATAATCATAGTACTGTGATAATGACTAGTGA	CATTATCACAGTACTATGAT 0.90803 1	igr_sense, NM_148293.1,NM_121778.1,NM_124371.2,NM_122899.2, 4
876 13 ath-MIR167b NC_003074:23417143-23417251:1	GGGAACAAGTGAAGCTGCCAGCATGATCTATCTTTGGTTAAGAGATGAATGTGGAAACATATTGCTTAAACCCAAGCTAGGTCATGCTCTGACAGCCTCACTCCTTCCT	TGAAGCTGCCAGCATGATCTA 0.0988082 1	igr_sense, HASH(0x11057cb0) NM_102771.2,NM_122002.2,NM_123060.2,NM_180523.1, 6
877 27 NC_003075:1116647-1116809:1	CAAAGTAGTCACTTTTCACTGTTTGATTCGTACACTTGGATTGTACATCACTTTTATTGTACAAATGTAAAGTGTACGCTGTGTATTTTTTATATACATCTGATCACTAAAAGTGGTGTACAAACTAAGTGTACGAATCAAACAGTGAAAAGTGACTATTTTG	ACTTTTCACTGTTTGATTCGT 0.457385 1	igr_sense, NM_202317.1,NM_121557.2,NM_127090.1,NM_100465.2,NM_105503.2,NM_104601.2,NM_179791.1,NM_127347.2, 57
878 25 NC_003075:1686416-1686490:1	AGACACTCGACCTCGTGGTCGAGTGGTGAGGTGAATTTGTGATGTCCTCTACTCGACCAGGGGGTCGAGTGGTCT	CACTCGACCTCGTGGTCGAGTGGT 0.463926 1	repeat_sense,igr_sense, NM_122820.1,NM_126793.1,NM_103358.1,NM_113671.2,NM_180584.1,NM_116794.1,NM_113972.1,NM_201705.1,NM_148798.1,NM_148247.1,NM_122819.1,NM_103339.1,NM_122890.1,NM_103391.1,NM_148526.1,NM_147956.1,NM_114067.1,NM_126888.1,NM_201713.1,NM_148782.1,NM_180576.1,NM_179436.1,NM_116802.1,NM_126833.1,NM_147987.1,NM_114100.1,NM_103342.1,NM_147971.1,NM_202235.1,NM_126781.1,NM_122822.1,NM_…
879 453 NC_003075:1765093-1765241:1	TGTGTGGTTGAGTGCGGAATGGAGAAGACAGTGAAGCTGGCAGTCGAGTATGAAGTCGAGTAGGAAGTCGAGTGATGGAGATGGTGGTACTCGGCTTGGTGGTAGAGTGATCGGTCGAGTGTGTGATGATGGTGGGACTCAGCCGTGTA	TGGTTGAGTGCGGAATGGAGAAGAC 0.0411281 0	repeat_sense,igr_sense, NM_106409.2,NM_113189.2,NM_126793.1,NM_128748.2,NM_179005.1,NM_117850.2,NM_128899.1,NM_180584.1,NM_116794.1,NM_113972.1,NM_201705.1,NM_148798.1,NM_148247.1,NM_103339.1,NM_126094.2,NM_179006.1,NM_148526.1,NM_147956.1,NM_126888.1,NM_201713.1,NM_179436.1,NM_116802.1,NM_126833.1,NM_147987.1,NM_103342.1,NM_201715.1,NM_202235.1,NM_126781.1,NM_122828.1,NM_113973.1,NM_179432.1,NM_…
880 25 NC_003075:1765324-1765408:1	GAGATGAAGATACTCGACCATGGGGTCGAGTGGTGGTGTGATGTGATGAGGCCATCTACTCGACTAGGGGGTCGAGTGTTGTCTT	TACTCGACCATGGGGTCGAGTGGTG 0.920961 0	repeat_sense,igr_sense, NM_202974.1,NM_126793.1,NM_103358.1,NM_180584.1,NM_116794.1,NM_113972.1,NM_201705.1,NM_148798.1,NM_148247.1,NM_103339.1,NM_122890.1,NM_120797.1,NM_202830.1,NM_103391.1,NM_148526.1,NM_119977.3,NM_147956.1,NM_114067.1,NM_126888.1,NM_201713.1,NM_148782.1,NM_180576.1,NM_179436.1,NM_116802.1,NM_126833.1,NM_147987.1,NM_103342.1,NM_147971.1,NM_202235.1,NM_126781.1,NM_122822.1,NM_…
881 25 NC_003075:1786767-1786874:1	GACCACTCGACCCCCTGGTCGAGTAGAAGACTTCACCACTCGACCACCTGGCCGAGTACCACCATGAGAGTCACTCGATCACTTCACTCGACCACCAGGTCGAGTATC	CACTCGACCCCCTGGTCGAGTA 0.595339 1	repeat_sense,igr_sense, NM_122820.1,NM_103358.1,NM_180584.1,NM_116794.1,NM_113972.1,NM_201705.1,NM_148798.1,NM_122819.1,NM_103339.1,NM_122890.1,NM_103391.1,NM_114067.1,NM_126888.1,NM_148782.1,NM_180576.1,NM_116802.1,NM_126833.1,NM_147987.1,NM_114100.1,NM_103342.1,NM_147971.1,NM_148010.1,NM_202235.1,NM_126781.1,NM_122822.1,NM_122889.1,NM_103402.1,NM_113973.1,NM_179432.1,NM_147959.1,NM_122821.1,NM_…
882 25 NC_003075:1811564-1811671:1	GACCACTCGACCCCCTGGTCGAGTAGAAGACTTCACCACTTGACCACCTGGCCGAATACCACCATGAGAGTCACTCAATCACTTCACTCGACCACCAGGTCGAGTATC	CACTCGACCCCCTGGTCGAGTA 0.482589 1	repeat_sense,igr_sense, NM_122820.1,NM_103358.1,NM_180584.1,NM_116794.1,NM_113972.1,NM_201705.1,NM_148798.1,NM_122819.1,NM_103339.1,NM_122890.1,NM_103391.1,NM_114067.1,NM_126888.1,NM_148782.1,NM_180576.1,NM_116802.1,NM_126833.1,NM_147987.1,NM_114100.1,NM_103342.1,NM_147971.1,NM_148010.1,NM_202235.1,NM_126781.1,NM_122822.1,NM_122889.1,NM_103402.1,NM_113973.1,NM_179432.1,NM_147959.1,NM_122821.1,NM_…
883 454 NC_003075:2178998-2179120:1	TGCTCTTCTATGTCTTCATCGTCATCACAAATTTCTTCAAACTTAAATATCTTAAGGACCTTCAACGGACTTGATAATAGAGATTAACGAACTTTGTGATGACAACGAAGATACAGAGGATCA	TGTCTTCATCGTCATCACAA 0.118371 1	igr_sense, NM_118224.2,NM_123491.1,NM_102757.1,NM_103693.2,NM_112467.1,NM_104236.2,NM_112838.2,NM_104524.2,NM_112147.2,NM_122463.2,NM_124020.1,NM_128597.2,NM_111302.1,NM_100941.2,NM_118572.2,NM_179878.1,NM_119140.1,NM_123893.1,NM_202571.1,NM_124416.2,NM_117680.2,NM_124779.1,NM_202878.1,NM_103879.1,NM_121450.1,NM_103064.2,NM_124936.2,NM_180244.1,NM_114774.2,NM_105658.2,NM_123220.2,NM_124022.1,NM_1…
884 3 NC_003075:2212107-2212207:1	GGAAGCAGTCTCTCGCAATATTTGCGAGGGATTAGCAATGTGCGTCCGTGGTCTTGCAAAATATCTGCAATTCCCTCGCAAATTTGCGAGGGATTCCTTCC	TCTCTCGCAATATTTGCGAGG 1.37177 1	repeat_sense,igr_sense, NM_123349.1,NM_122183.3,NM_126984.2,NM_126985.2,NM_111050.1,NM_124688.2,NM_180727.1,NM_125373.2,NM_113908.1,NM_122762.1,NM_122184.2,NM_180726.1, 58
885 107 ath-MIR397a NC_003075:2625949-2626052:1	GAATGAACATCATTGAGTGCAGCGTTGATGTAATTTCGTTTTGTTTTTCATTGTTGAATGGATTAAAAGAATTTATACCAGCGTTGCGCTCAATTATGTTTTTC	CATCATTGAGTGCAGCGTTGATG 0.491047 1	igr_sense, HASH(0x111e2a5c) NM_101948.2,NM_120059.2,NM_128470.3,NM_111522.2,NM_119477.1,NM_100390.1,NM_115889.3,NM_125395.2,NM_126605.2,NM_129364.2, 8
886 25 NC_003075:3088521-3088589:1	CTACTCGACCTGGGGGTCGAGTGGTCTCTTCAGATCTTGAAGCTCCTACTCGACCTCTAGGTCGAGTGG	CTCGACCTGGGGGTCGAGTG 0.028301 1	repeat_sense,igr_sense, NM_126793.1,NM_103358.1,NM_180584.1,NM_116794.1,NM_113972.1,NM_201705.1,NM_148798.1,NM_148247.1,NM_103339.1,NM_103391.1,NM_148526.1,NM_147956.1,NM_126888.1,NM_201713.1,NM_148782.1,NM_179436.1,NM_116802.1,NM_126833.1,NM_147987.1,NM_103342.1,NM_202235.1,NM_126781.1,NM_122822.1,NM_113973.1,NM_179432.1,NM_122821.1,NM_126773.1,NM_147965.1, 957
887 25 NC_003075:3097600-3097689:1	GTGGTGTCTTCTACTCGACCTGGGGGTCGAGTGGTCTCTTGAGATCTTGAAGCTCCTACTCGACCTCAGGGTCGAGTGGTTTGTCATGAT	CTACTCGACCTGGGGGTCGAGTGGT 1.3323 0	repeat_sense,igr_sense, NM_126793.1,NM_122830.1,NM_103358.1,NM_180584.1,NM_116794.1,NM_113972.1,NM_201705.1,NM_148798.1,NM_148247.1,NM_122819.1,NM_103339.1,NM_103391.1,NM_148526.1,NM_147956.1,NM_126888.1,NM_201713.1,NM_148782.1,NM_179436.1,NM_116802.1,NM_126833.1,NM_147987.1,NM_103342.1,NM_202235.1,NM_126781.1,NM_122822.1,NM_113973.1,NM_179432.1,NM_122821.1,NM_120741.2,NM_126773.1,NM_147965.1, 11…
888 25 NC_003075:3097610-3097678:1	CTACTCGACCTGGGGGTCGAGTGGTCTCTTGAGATCTTGAAGCTCCTACTCGACCTCAGGGTCGAGTGG	TCGACCTGGGGGTCGAGTGGT 0.0795579 0	repeat_sense,igr_sense, NM_126793.1,NM_103358.1,NM_180584.1,NM_116794.1,NM_113972.1,NM_201705.1,NM_148798.1,NM_148247.1,NM_103339.1,NM_103391.1,NM_148526.1,NM_147956.1,NM_126888.1,NM_148782.1,NM_179436.1,NM_116802.1,NM_126833.1,NM_147987.1,NM_103342.1,NM_202235.1,NM_126781.1,NM_113973.1,NM_179432.1,NM_120741.2,NM_126773.1,NM_147965.1, 713
889 25 NC_003075:3174695-3174784:1	GTGATGTCCTCTACTCGACCTGGTGGTCGAGTGGTCTCTTGAGATCTTGAAGCTCCTACTCGACCTCTGGGTCGAGTGGTTTGGCATGAT	CTACTCGACCTGGTGGTCGAGTGGT 1.26518 0	repeat_sense,igr_sense, NM_122820.1,NM_126793.1,NM_179005.1,NM_122830.1,NM_103358.1,NM_122817.1,NM_180584.1,NM_116794.1,NM_113967.1,NM_113972.1,NM_201705.1,NM_148798.1,NM_148247.1,NM_122819.1,NM_103339.1,NM_103391.1,NM_148526.1,NM_147956.1,NM_114067.1,NM_126888.1,NM_201713.1,NM_148782.1,NM_179436.1,NM_122815.1,NM_116802.1,NM_126833.1,NM_147987.1,NM_103342.1,NM_202235.1,NM_126781.1,NM_122822.1,NM_…
890 25 NC_003075:3174705-3174773:1	CTACTCGACCTGGTGGTCGAGTGGTCTCTTGAGATCTTGAAGCTCCTACTCGACCTCTGGGTCGAGTGG	TCGACCTGGTGGTCGAGTGGT 0.129645 0	repeat_sense,igr_sense, NM_126793.1,NM_179005.1,NM_103358.1,NM_122817.1,NM_180584.1,NM_116794.1,NM_113972.1,NM_113967.1,NM_201705.1,NM_148798.1,NM_148247.1,NM_103339.1,NM_103391.1,NM_147956.1,NM_126888.1,NM_201713.1,NM_148782.1,NM_179436.1,NM_122815.1,NM_116802.1,NM_126833.1,NM_147987.1,NM_103342.1,NM_202235.1,NM_126781.1,NM_113973.1,NM_179432.1,NM_126773.1,NM_147965.1, 505
891 25 NC_003075:3183911-3183988:1	GAGGGCACTCGACCTCGGGGTCGAGTGGTGAAGTGAAGTGGTGATGTCCTCTACTCGACCTGGTGGTCGAGTGGTCTC	CGACCTCGGGGTCGAGTGGT 0.219569 1	repeat_sense,igr_sense, NM_126793.1,NM_103358.1,NM_180584.1,NM_116794.1,NM_113972.1,NM_201705.1,NM_148798.1,NM_148247.1,NM_103339.1,NM_103391.1,NM_148526.1,NM_147956.1,NM_126888.1,NM_148782.1,NM_179436.1,NM_116802.1,NM_126833.1,NM_147987.1,NM_103342.1,NM_202235.1,NM_126781.1,NM_113973.1,NM_179432.1,NM_126773.1,NM_147965.1, 525
892 25 NC_003075:3183961-3184029:1	CTACTCGACCTGGTGGTCGAGTGGTCTCTTGAGATCTTGAAGCTCCTACTCGACCTCTGGGTCGAGTGG	CTCGACCTGGTGGTCGAGTGGT 0.196764 0	repeat_sense,igr_sense, NM_126793.1,NM_179005.1,NM_103358.1,NM_122817.1,NM_180584.1,NM_116794.1,NM_113967.1,NM_113972.1,NM_201705.1,NM_148798.1,NM_148247.1,NM_103339.1,NM_103391.1,NM_148526.1,NM_147956.1,NM_114067.1,NM_126888.1,NM_201713.1,NM_148782.1,NM_179436.1,NM_122815.1,NM_116802.1,NM_126833.1,NM_147987.1,NM_103342.1,NM_202235.1,NM_126781.1,NM_122822.1,NM_113973.1,NM_179432.1,NM_122821.1,NM_…
893 25 NC_003075:3269846-3269915:1	TACTCGACCACATGGTCGAGTATTAACATCGAGTGGTTGTCTTGGTGGTACTCGACCACAGGGTCGAGTG	ATACTCGACCACATGGTCGAGT 0.54349 0	repeat_sense,igr_sense, NM_122820.1,NM_126793.1,NM_118532.2,NM_103358.1,NM_113463.1,NM_180584.1,NM_116794.1,NM_113972.1,NM_201705.1,NM_148798.1,NM_148247.1,NM_103339.1,NM_122890.1,NM_103391.1,NM_148526.1,NM_147956.1,NM_114067.1,NM_126888.1,NM_201713.1,NM_148782.1,NM_180576.1,NM_179436.1,NM_116802.1,NM_126833.1,NM_147987.1,NM_114100.1,NM_103342.1,NM_147971.1,NM_202235.1,NM_126781.1,NM_122822.1,NM_…
894 25 NC_003075:3284428-3284533:1	GATGACATTACTCGACCCCCTGGTCGGGTATCACTTTGCCACACCACCTTACCACACTCGACCATTCACTCTACCCCGTTACTCGACCCACTGGTCGAGTATCATC	TACTCGACCCCCTGGTCGGGTA 0.243025 0	repeat_sense,igr_sense, NM_122820.1,NM_113972.1,NM_122819.1,NM_122890.1,NM_103391.1,NM_114067.1,NM_180576.1,NM_147987.1,NM_114100.1,NM_147971.1,NM_202235.1,NM_126781.1,NM_122889.1,NM_113973.1,NM_179432.1,NM_147959.1,NM_180578.1, 597
895 25 NC_003075:3537532-3537600:1	CTACTCGACCTGGGGGTCGAGTGGTCTCTTGAGATCTTGAAGCTCCTACTCGACCTCTGGGTCGAGTGG	CTCGACCTGGGGGTCGAGTGGT 0.157166 0	repeat_sense,igr_sense, NM_126793.1,NM_103358.1,NM_180584.1,NM_116794.1,NM_113972.1,NM_201705.1,NM_148798.1,NM_148247.1,NM_103339.1,NM_103391.1,NM_148526.1,NM_147956.1,NM_126888.1,NM_201713.1,NM_148782.1,NM_179436.1,NM_116802.1,NM_126833.1,NM_147987.1,NM_103342.1,NM_202235.1,NM_126781.1,NM_122822.1,NM_113973.1,NM_179432.1,NM_122821.1,NM_120741.2,NM_126773.1,NM_147965.1, 971
896 25 NC_003075:3546904-3546972:1	CTACTCGACCTGGGGGTCGAGTGGTCTCTTGAGATCTTGAAGCTCCTACTCGACCGCTGGGTCGAGTGG	CTCGACCTGGGGGTCGAGTGGT 0.158959 0	repeat_sense,igr_sense, NM_126793.1,NM_103358.1,NM_180584.1,NM_116794.1,NM_113972.1,NM_201705.1,NM_148798.1,NM_148247.1,NM_103339.1,NM_103391.1,NM_148526.1,NM_147956.1,NM_126888.1,NM_201713.1,NM_148782.1,NM_179436.1,NM_116802.1,NM_126833.1,NM_147987.1,NM_103342.1,NM_202235.1,NM_126781.1,NM_122822.1,NM_113973.1,NM_179432.1,NM_122821.1,NM_120741.2,NM_126773.1,NM_147965.1, 971
897 39 NC_003075:3570388-3570499:1	GATACCCCTCTAGTGTCGATCGACACCATAGGGGATGCTCTTCTCAGAGACGACTAAATACGACGGTGTCAATCGATACCCCTCTAGTGTCGATCGACACTAGATCCGGATC	TCTAGTGTCGATCGACACCAT 0.613431 1	repeat_sense,igr_sense, NM_114016.1,NM_126896.1,NM_126950.1,NM_116818.1,NM_147252.1,NM_114074.1,NM_114079.1,NM_104186.2,NM_114102.1,NM_148522.1,NM_122848.1,NM_126918.1, 437
898 25 NC_003075:3617033-3617158:1	TGGTGGTACTCGACCACGGGGTCGAGTGGTGATGTGAAGTTATGGGTTCGTCTACTTGACCAGGGGTCAAGTGGTGGTGAGAAGTGGTGATGCCATATACTCGACCAGGGGGTCGAGTGGTGATCA	GGTACTCGACCACGGGGTCGAGTG 0.36304 0	repeat_sense,igr_sense, NM_122820.1,NM_123615.2,NM_126793.1,NM_103358.1,NM_180584.1,NM_116794.1,NM_113972.1,NM_201705.1,NM_148798.1,NM_148247.1,NM_122819.1,NM_103339.1,NM_122890.1,NM_103391.1,NM_148526.1,NM_147956.1,NM_114067.1,NM_126888.1,NM_201713.1,NM_148782.1,NM_180576.1,NM_123420.1,NM_179436.1,NM_116802.1,NM_126833.1,NM_147987.1,NM_103342.1,NM_147971.1,NM_202235.1,NM_126781.1,NM_122822.1,NM_…
899 25 NC_003075:3637506-3637591:1	TGGGTTCATCTACTCGACCAAGGGGTCGAGTGGTGGTGAGAAGTGGTGATGCCATCTACTCGACAAGGGGGTCGTGTGGTGATCCA	CTACTCGACCAAGGGGTCGAGTGGTG 0.355906 0	repeat_sense,igr_sense, NM_104588.2,NM_126793.1,NM_103358.1,NM_180584.1,NM_116794.1,NM_113972.1,NM_201705.1,NM_148798.1,NM_148247.1,NM_122819.1,NM_103339.1,NM_122890.1,NM_103391.1,NM_148526.1,NM_147956.1,NM_126888.1,NM_201713.1,NM_148782.1,NM_180576.1,NM_123420.1,NM_179436.1,NM_116802.1,NM_126833.1,NM_147987.1,NM_103342.1,NM_147971.1,NM_202235.1,NM_126781.1,NM_122822.1,NM_122889.1,NM_113973.1,NM_…
900 25 NC_003075:3737403-3737483:1	CACTCGACCTCAAGGTCGAGTGAAGTGATCGAGTGACCGTGTGGTGATGGAGATGATGGCACTCGACCTCGGGGTCGAGTG	TCGACCTCAAGGTCGAGTGA 0.209028 0	repeat_sense,igr_sense, NM_116766.1,NM_116794.1,NM_113972.1,NM_148798.1,NM_122819.1,NM_122890.1,NM_103391.1,NM_147956.1,NM_126888.1,NM_148782.1,NM_180576.1,NM_147987.1,NM_103342.1,NM_147971.1,NM_180913.1,NM_202235.1,NM_126781.1,NM_122889.1,NM_122828.1,NM_113973.1,NM_179432.1,NM_125593.2,NM_147959.1,NM_180578.1,NM_126773.1,NM_147965.1, 227
901 25 NC_003075:3737495-3737588:1	TGGTGATGTGCTCTACTCGACCTGGTTGTCGAGTGGTCTCTTGAGATCTTGAAGCTCCTACTCGACCTCTGGGTCGAGTGGTTTGTCATGATCA	CTCTACTCGACCTGGTTGTCGAGTG 0.241579 0	repeat_sense,igr_sense, NM_201757.1,NM_126793.1,NM_122830.1,NM_103358.1,NM_180584.1,NM_116794.1,NM_113972.1,NM_119078.3,NM_201705.1,NM_148798.1,NM_148247.1,NM_127566.2,NM_122819.1,NM_103339.1,NM_103391.1,NM_148526.1,NM_147956.1,NM_126888.1,NM_201713.1,NM_148782.1,NM_179436.1,NM_116410.1,NM_116802.1,NM_126833.1,NM_147987.1,NM_103342.1,NM_202235.1,NM_126781.1,NM_101418.3,NM_113973.1,NM_179432.1,NM_…
902 25 NC_003075:3737507-3737575:1	CTACTCGACCTGGTTGTCGAGTGGTCTCTTGAGATCTTGAAGCTCCTACTCGACCTCTGGGTCGAGTGG	TCGACCTGGTTGTCGAGTGGT 0.117583 0	repeat_sense,igr_sense, NM_126793.1,NM_103358.1,NM_180584.1,NM_116794.1,NM_113972.1,NM_201705.1,NM_148798.1,NM_148247.1,NM_113400.3,NM_103339.1,NM_103391.1,NM_147956.1,NM_126888.1,NM_116802.1,NM_147987.1,NM_103342.1,NM_202235.1,NM_126781.1,NM_113973.1,NM_179432.1,NM_126773.1,NM_147965.1, 171
903 25 NC_003075:3749647-3749727:1	CACTCGACCTCAAGGTCGAGTGAAGTGATCGAGTGACCGTGTGGTGATGGAGATGATGGCACTCGACCTCGGGGTCGAGTG	TCGACCTCAAGGTCGAGTGA 0.209028 0	repeat_sense,igr_sense, NM_116766.1,NM_116794.1,NM_113972.1,NM_148798.1,NM_122819.1,NM_122890.1,NM_103391.1,NM_147956.1,NM_126888.1,NM_148782.1,NM_180576.1,NM_147987.1,NM_103342.1,NM_147971.1,NM_180913.1,NM_202235.1,NM_126781.1,NM_122889.1,NM_122828.1,NM_113973.1,NM_179432.1,NM_125593.2,NM_147959.1,NM_180578.1,NM_126773.1,NM_147965.1, 227
904 25 NC_003075:3749739-3749832:1	TGGTGATGTGCTCTACTCGACCTGGTTGTCGAGTGGTCTCTTGAGATCTTGAAGCTCCTACTCGACCTCTGGGTCGAGTGGTTTGTCATGATCA	CTCTACTCGACCTGGTTGTCGAGTG 0.241579 0	repeat_sense,igr_sense, NM_201757.1,NM_126793.1,NM_122830.1,NM_103358.1,NM_180584.1,NM_116794.1,NM_113972.1,NM_119078.3,NM_201705.1,NM_148798.1,NM_148247.1,NM_127566.2,NM_122819.1,NM_103339.1,NM_103391.1,NM_148526.1,NM_147956.1,NM_126888.1,NM_201713.1,NM_148782.1,NM_179436.1,NM_116410.1,NM_116802.1,NM_126833.1,NM_147987.1,NM_103342.1,NM_202235.1,NM_126781.1,NM_101418.3,NM_113973.1,NM_179432.1,NM_…
905 25 NC_003075:3749751-3749819:1	CTACTCGACCTGGTTGTCGAGTGGTCTCTTGAGATCTTGAAGCTCCTACTCGACCTCTGGGTCGAGTGG	TCGACCTGGTTGTCGAGTGGT 0.117583 0	repeat_sense,igr_sense, NM_126793.1,NM_103358.1,NM_180584.1,NM_116794.1,NM_113972.1,NM_201705.1,NM_148798.1,NM_148247.1,NM_113400.3,NM_103339.1,NM_103391.1,NM_147956.1,NM_126888.1,NM_116802.1,NM_147987.1,NM_103342.1,NM_202235.1,NM_126781.1,NM_113973.1,NM_179432.1,NM_126773.1,NM_147965.1, 171
906 25 NC_003075:3905030-3905145:1	ATACTCGACCATGGGGTCGAGTGGTGGTGTGAAGTGATAAGGCCTTCTACTCGACCAGGAGGTCGAGTGGTTTGTTAAAATCGCGGAGCCATCTACTCGACCATGGGGTCGAGTGT	CTCGACCATGGGGTCGAGTG 0.044992 0	repeat_sense,igr_sense, NM_126793.1,NM_103358.1,NM_180584.1,NM_116794.1,NM_113972.1,NM_201705.1,NM_148798.1,NM_148247.1,NM_103339.1,NM_103391.1,NM_202830.1,NM_148526.1,NM_147956.1,NM_114067.1,NM_126888.1,NM_201713.1,NM_148782.1,NM_179436.1,NM_116802.1,NM_126833.1,NM_147987.1,NM_103342.1,NM_202235.1,NM_126781.1,NM_122822.1,NM_122828.1,NM_113973.1,NM_179432.1,NM_122821.1,NM_126773.1,NM_147965.1, 858
907 25 NC_003075:3957564-3957707:1	GGTGAAGGCACTCGACCACGGGGTCGAGTGACGTGATCGAGTGTTGGTCAGGAGATACTCGACTTCCAGGTTGAGTGAAGAGGTCGAGTGGTTGTCTGATGATGGAGGTGAAGACACTCGACCTCATGGTCGAGTGAAGTGATC	CTCGACCACGGGGTCGAGTG 0.411548 1	repeat_sense,igr_sense, NM_122820.1,NM_126793.1,NM_103358.1,NM_180584.1,NM_116794.1,NM_113972.1,NM_201705.1,NM_148798.1,NM_148247.1,NM_122819.1,NM_103339.1,NM_122890.1,NM_103391.1,NM_148526.1,NM_147956.1,NM_114067.1,NM_126888.1,NM_201713.1,NM_148782.1,NM_180576.1,NM_179436.1,NM_116802.1,NM_126833.1,NM_147987.1,NM_103342.1,NM_147971.1,NM_202235.1,NM_126781.1,NM_122822.1,NM_122889.1,NM_103402.1,NM_…
908 25 NC_003075:3957782-3957850:1	CTACTCGACCTGGTGGTCGAGTGGTCTCTTGAGATCTTGAAGCTCCTACTCGACCTCTGGGTCGAGTGG	CTCGACCTGGTGGTCGAGTGGT 0.23026 0	repeat_sense,igr_sense, NM_126793.1,NM_179005.1,NM_103358.1,NM_122817.1,NM_180584.1,NM_116794.1,NM_113967.1,NM_113972.1,NM_201705.1,NM_148798.1,NM_148247.1,NM_103339.1,NM_103391.1,NM_148526.1,NM_147956.1,NM_114067.1,NM_126888.1,NM_201713.1,NM_148782.1,NM_179436.1,NM_122815.1,NM_116802.1,NM_126833.1,NM_147987.1,NM_103342.1,NM_202235.1,NM_126781.1,NM_122822.1,NM_113973.1,NM_179432.1,NM_122821.1,NM_…
[truncated: 414 more rows]
